# Supplementary material for: Analysis and Experimental Study on Bearing Capacity of “All‐Inclusive” Underpinning Joint
Source: Hindawi journal article supplement (doi:10.1155/2020/9124534), 2020-01-01
Supplement: f1 [file 9124534.f1.csv]

LOAD	Z2						Z1								Z3		Z7			Z5					Z6								RIGHT					AFTER				LEFT		DOWN
CH001	CH030	CH031	CH032	CH035	CH036	CH037	CH039	CH040	CH041	CH042	CH043	CH044	CH045	CH046	CH047	CH048	CH049	CH050	CH051	CH052	CH053	CH054	CH055	CH056	CH057	CH059	CH060	CH061	CH062	CH063	CH064	CH065	CH067	CH069	CH070	CH071	CH072	CH073	CH074	CH075	CH077	CH078	CH079	CH080	CH081	CH082	CH083	CH084	CH085
6.32	1	0	4	8	8	14	1	7	-7	9	0	-1	0	-2	0	-2	-1	-1	0	-1	0	0	-1	0	0	-1	-1	1	-1	-1	1	-1	-2	0	0	-1	-1	-1	0	0	-2	-1	-3	2	1	0	-1	-2	0
0	0	-4	-2	0	-1	-1	1	-1	-4	-1	0	0	0	-2	0	-1	0	0	-1	-1	0	0	0	-1	-1	-1	-1	0	-2	0	0	0	0	0	0	0	0	0	0	0	-1	0	-1	-1	-1	-1	0	-2	-1
0	0	-3	-2	0	0	-1	-1	-2	-3	-2	-1	-1	-1	-2	-1	-1	0	0	-1	-1	0	0	0	-1	-1	-1	-2	-1	-2	-1	-1	0	2	0	0	1	0	-1	0	-1	-6	0	-2	-1	0	-1	-2	0	-2
40.55	-3	-4	-2	0	-2	-3	-23	-5	-3	-5	-2	-1	0	-1	0	-1	-1	-1	-2	-1	5	0	-3	91	-2	-26	-2	0	-2	0	-2	-1	1	-1	-2	0	1	-3	-2	0	3	-2	-9	13	1	5	-1	4	5
47.09	-4	-6	-12	-11	-1	-2	-22	-5	-45	-6	-2	0	3	-1	3	-2	-2	-2	-3	-1	5	0	-3	89	-1	-27	-3	-2	-2	0	-4	-6	-5	-2	-1	0	1	-3	1	1	-25	-2	-15	15	-6	3	-4	-2	3
47.09	-4	-8	-12	-11	-1	-2	-23	-5	-45	-6	-2	0	3	-1	3	-2	-1	-2	-3	-1	4	1	-3	88	-1	-28	-3	-2	-3	0	-4	-6	-6	-1	-1	0	1	-4	1	1	-12	-3	-17	14	-6	1	-5	-2	0
47.09	-3	-6	-12	-12	-1	-2	-24	-5	-48	-6	-2	0	3	0	3	-2	-1	-2	-3	-1	4	0	-3	88	-1	-28	-4	-2	-2	0	-4	-7	-5	-2	-1	1	1	-3	2	1	-17	-2	-20	14	-7	2	-4	-3	0
47.09	-3	-7	-14	-13	0	-2	-24	-5	-48	-6	-2	0	4	0	3	-2	-1	-2	-3	-1	4	0	-3	88	-1	-27	-3	-3	-3	0	-4	-7	-5	-2	-1	1	1	-4	2	2	-21	-3	-20	15	-3	4	-4	-2	1
53.62	-2	-1	-14	-13	0	-2	-24	-5	-48	-6	-2	0	3	0	4	-2	-1	-2	-3	-1	4	0	-3	87	-1	-28	-4	-3	-3	0	-5	-5	-7	-2	-1	1	1	-4	2	2	-13	-2	-21	20	-4	-1	-4	-3	1
53.68	-2	-7	-15	-14	0	-2	-23	-5	-46	-5	-2	1	3	0	3	-2	-2	-3	-3	-1	4	0	-3	87	-1	-28	-4	-3	-3	0	-5	-4	-6	-2	-1	1	1	-4	2	2	-25	-2	-21	14	-7	1	-4	-1	1
53.68	-2	-5	-16	-15	0	-2	-24	-5	-45	-6	-3	0	4	0	3	-2	-1	-3	-3	-1	4	1	-3	86	-1	-28	-4	-3	-3	0	-5	-4	-6	-2	-1	1	1	-4	2	2	-17	-3	-21	15	-7	1	-6	-3	0
60.8	-3	-8	-14	-14	0	-2	-24	-5	-44	-6	-2	0	4	0	3	-2	-2	-5	-3	-1	3	0	-4	86	-1	-28	-4	-4	-3	-1	-5	-7	-5	-2	-1	1	1	-4	3	2	-21	-3	-20	14	-9	3	-5	-3	1
60.8	-1	-8	-20	-17	1	-1	-23	-5	-47	-6	-3	1	6	0	6	-3	-2	-5	-3	-1	3	0	-3	86	-1	-28	-5	-5	-4	-1	-7	-10	-6	-3	-1	1	1	-4	3	3	-21	-3	-22	13	-8	1	-6	-6	-3
73.87	-1	-6	-35	-27	3	0	-22	-5	-52	-6	-4	2	10	2	10	-4	-2	-6	-3	0	3	2	-3	85	-1	-29	-6	-7	-5	-1	-11	-9	-6	-5	0	1	1	-5	4	6	-29	-3	-22	13	-8	0	-5	-5	-2
81.16	0	-6	-44	-34	4	0	-21	-5	-54	-6	-4	3	14	2	12	-4	-3	-6	-3	0	3	1	-3	84	-1	-29	-6	-8	-6	-2	-13	-8	-7	-5	0	2	1	-6	5	7	-28	-3	-23	11	-8	-1	-3	-11	-2
87.53	1	-9	-54	-41	5	0	-20	-5	-54	-6	-4	5	16	3	14	-4	-3	-6	-4	1	2	2	-2	84	-1	-29	-7	-9	-6	-2	-15	-9	-6	-6	0	2	1	-6	6	8	-23	-3	-24	13	-8	1	-7	-7	-3
94.12	2	-6	-62	-50	7	1	-20	-5	-56	-6	-4	6	19	4	17	-5	-2	-6	-3	1	2	2	-2	83	-1	-30	-7	-11	-7	-2	-17	-8	-6	-7	0	2	2	-6	6	10	-27	-3	-26	10	-6	-1	-7	-10	-5
101.41	3	-10	-80	-76	8	3	-23	-5	-57	-7	-5	7	24	5	22	-6	-3	-6	-4	1	1	2	-1	83	-2	-30	-8	-13	-8	-3	-22	-8	-6	-8	1	1	2	-6	7	13	-34	-3	-24	13	-8	-2	-7	-11	-7
101.41	3	-6	-83	-80	9	4	-23	-5	-55	-6	-5	8	25	6	23	-6	-3	-6	-4	2	1	2	-1	83	-1	-31	-9	-14	-9	-2	-23	-9	-6	-8	1	1	2	-7	7	14	-30	-2	-24	9	-4	-2	-7	-12	-5
101.41	3	-12	-85	-84	8	3	-25	-5	-54	-7	-5	8	26	5	24	-6	-3	-6	-4	2	1	2	-1	82	-2	-31	-9	-14	-9	-3	-23	-8	-6	-9	1	1	2	-7	7	14	-30	-2	-22	13	-7	-1	-4	-15	-4
101.41	2	-10	-86	-84	8	3	-26	-5	-53	-7	-5	8	26	6	24	-6	-3	-6	-4	2	1	3	-1	81	-1	-31	-10	-14	-9	-3	-23	-10	-6	-8	1	1	3	-7	7	14	-24	-3	-21	10	-6	-2	-7	-13	-6
81.11	2	-11	-86	-84	8	3	-26	-5	-56	-7	-5	7	25	5	24	-6	-3	-6	-4	2	1	2	-1	82	-2	-32	-10	-14	-9	-3	-23	-9	-6	-8	1	1	3	-7	7	14	-25	-2	-24	12	-8	-3	-5	-15	-3
73.82	2	-8	-86	-83	8	3	-26	-6	-54	-7	-5	7	25	5	24	-6	-3	-6	-5	2	1	2	-1	81	-2	-31	-9	-14	-9	-3	-23	-9	-5	-8	1	1	2	-6	7	14	-32	-3	-25	11	-6	-3	-6	-13	-5
73.82	3	-9	-85	-83	8	3	-26	-5	-54	-7	-5	7	25	5	24	-7	-3	-6	-5	2	1	3	-1	82	-2	-31	-9	-14	-9	-3	-23	-9	-5	-8	1	1	2	-7	7	13	-22	-2	-26	10	-7	-3	-6	-13	-6
73.82	3	-9	-85	-83	8	3	-26	-5	-55	-7	-6	7	25	5	24	-7	-3	-6	-4	2	1	3	-1	81	-2	-31	-9	-14	-9	-2	-23	-9	-7	-8	1	1	2	-7	7	14	-32	-3	-25	11	-6	-3	-7	-14	-6
73.82	2	-11	-85	-82	8	3	-27	-6	-54	-7	-5	7	24	5	23	-6	-3	-6	-5	1	0	2	-2	81	-2	-31	-9	-14	-9	-3	-23	-8	-6	-8	1	0	3	-7	7	14	-30	-2	-26	11	-7	-2	-5	-13	-6
60.8	2	-9	-81	-78	7	2	-27	-6	-52	-7	-5	7	23	4	22	-6	-3	-6	-4	1	1	2	-2	81	-2	-31	-9	-13	-8	-3	-22	-7	-6	-8	1	1	2	-6	7	12	-33	-3	-25	9	-7	-3	-7	-13	-5
60.8	1	-11	-78	-73	7	1	-26	-6	-52	-8	-5	6	22	4	21	-6	-3	-6	-4	1	1	2	-2	81	-2	-31	-9	-12	-8	-2	-21	-8	-7	-7	0	1	2	-4	7	11	-31	-3	-25	12	-7	-3	-6	-13	-6
47.09	1	-5	-74	-67	6	1	-27	-6	-51	-7	-5	6	21	3	19	-6	-3	-6	-4	1	0	2	-2	81	-2	-32	-8	-11	-8	-2	-18	-9	-6	-7	0	0	2	-4	6	10	-40	-3	-25	10	-6	-2	-8	-10	-7
13.01	-1	-7	-64	-53	5	0	-29	-6	-50	-8	-5	4	17	2	15	-6	-3	-6	-4	0	1	2	-3	81	-2	-32	-8	-10	-7	-3	-16	-4	-3	-6	-1	0	2	-4	5	8	-28	-3	-25	12	-9	9	-7	-10	-4
6.53	-1	-8	-56	-43	3	-1	-28	-6	-49	-7	-5	3	15	2	13	-5	-3	-6	-4	0	1	1	-4	81	-2	-31	-7	-9	-7	-2	-15	-7	-8	-5	-1	0	2	-4	5	7	-36	-3	-25	13	-8	-2	-8	-9	-7
0	-2	-8	-49	-39	3	-1	-29	-6	-50	-7	-4	3	14	2	12	-5	-3	-6	-4	0	1	0	-4	81	-2	-31	-7	-8	-6	-2	-13	-8	-7	-5	-1	0	2	-4	5	7	-35	-3	-26	15	-9	-1	-7	-10	-5
20.2	-4	-8	-27	-24	-1	-3	-31	-7	-49	-9	-4	0	6	0	6	-4	-3	-6	-4	-1	2	1	-5	81	-2	-31	-6	-5	-5	-2	-9	-10	-7	-3	-1	0	1	-4	3	3	-28	-4	-21	11	-8	-1	-9	-5	-5
20.2	-5	-8	-27	-24	-1	-3	-31	-7	-49	-8	-4	0	6	-1	6	-4	-3	-6	-4	-1	1	0	-5	81	-2	-32	-6	-6	-5	-2	-9	-12	-7	-3	-2	0	1	-4	3	4	-23	-3	-22	10	-8	-2	-7	-7	-4
20.2	-4	-9	-26	-24	-1	-3	-31	-6	-50	-8	-4	1	6	-1	6	-4	-4	-6	-4	-1	1	0	-5	80	-2	-31	-6	-5	-5	-2	-9	-9	-8	-3	-1	0	2	-4	3	3	-40	-4	-24	12	-10	0	-10	-6	-5
26.78	-3	-8	-27	-24	-1	-2	-31	-7	-49	-8	-4	0	6	-1	6	-4	-3	-6	-4	-1	1	0	-5	81	-2	-32	-6	-6	-5	-2	-9	-11	-8	-4	-1	0	2	-4	3	3	-32	-3	-24	16	-9	-1	-8	-7	-4
26.73	-4	-8	-27	-24	-1	-3	-31	-7	-51	-8	-4	1	6	-1	6	-4	-3	-6	-4	-1	2	1	-5	81	-2	-31	-6	-5	-5	-2	-9	-8	-8	-3	-1	0	1	-4	3	3	-37	-3	-25	10	-8	-1	-7	-7	-4
26.78	-4	-8	-27	-24	-1	-3	-30	-7	-49	-8	-4	1	6	-1	6	-4	-3	-6	-4	-1	1	1	-5	80	-2	-31	-6	-5	-5	-1	-9	-9	-8	-3	-2	0	1	-4	4	4	-37	-3	-25	11	-10	-3	-7	-8	-3
26.78	-4	-12	-27	-25	0	-2	-31	-6	-51	-8	-4	0	7	0	6	-4	-3	-6	-4	-1	2	1	-5	81	-2	-31	-6	-5	-5	-1	-9	-8	-9	-3	-1	0	1	-4	3	3	-31	-4	-24	17	-11	1	-8	-7	-3
33.32	-3	-8	-27	-25	0	-2	-30	-6	-49	-8	-4	1	7	0	7	-4	-4	-6	-4	-1	2	0	-5	80	-2	-32	-6	-6	-5	-1	-9	-9	-8	-3	-1	0	1	-4	3	3	-30	-3	-23	13	-8	0	-8	-6	-2
33.32	-4	17	-29	-25	0	-2	-30	-7	-48	-8	-4	1	7	0	7	-4	-3	-6	-4	0	1	0	-5	80	-2	-31	-6	-6	-6	-1	-10	-10	-8	-3	-1	0	1	-4	3	4	-29	-4	-22	11	46	-1	-6	-7	-3
33.32	-4	-6	-31	-26	0	-2	-30	-6	-46	-8	-4	1	8	0	8	-4	-3	-6	-4	0	1	2	-5	80	-2	-31	-6	-6	-5	-2	-10	-10	-7	-3	-1	0	1	-4	3	4	-28	-3	-21	11	-8	0	-7	-8	-4
40.5	-4	-12	-32	-27	0	-2	-31	-7	-47	-8	-4	1	8	0	8	-4	-3	-6	-4	-1	1	0	-4	80	-2	-31	-6	-6	-5	-2	-10	-10	-7	-4	-1	0	2	-4	4	4	-32	-3	-22	15	-12	-1	-8	-8	-6
40.5	-3	-9	-33	-27	1	-2	-30	-6	-46	-8	-4	1	8	0	8	-4	-3	-6	-4	0	1	2	-5	80	-1	-31	-6	-6	-5	-1	-10	-10	-8	-4	-1	0	2	-4	4	5	-28	-3	-22	11	-10	0	-4	-10	-2
40.5	-3	-9	-34	-27	0	-2	-31	-6	-45	-8	-4	1	9	0	8	-4	-3	-6	-4	0	1	2	-5	80	-1	-31	-6	-6	-5	-1	-10	-9	-8	-4	-1	0	2	-4	4	5	-29	-3	-24	10	-10	-1	-8	-7	-7
40.5	-3	-13	-35	-28	0	-2	-30	-7	-45	-8	-4	1	9	0	8	-5	-3	-6	-4	0	1	1	-5	80	-1	-32	-6	-6	-5	-2	-11	-9	-8	-4	-1	0	2	-4	4	5	-31	-4	-22	11	-11	0	-8	-8	-6
47.09	-3	-9	-36	-29	1	-2	-30	-7	-44	-8	-4	2	9	1	9	-5	-3	-6	-4	0	1	0	-4	80	-2	-31	-6	-7	-5	-2	-11	-8	-8	-4	-1	-1	2	-4	4	5	-35	-4	-22	13	-9	-2	-8	-9	-6
47.03	-2	-10	-38	-30	1	-2	-30	-6	-44	-8	-4	2	10	1	9	-4	-3	-5	-4	-1	1	1	-4	79	-2	-32	-6	-7	-6	-2	-11	-9	-8	-4	-1	-1	1	-4	4	5	-30	-3	-22	9	-9	0	-8	-8	-4
47.03	-2	-8	-39	-30	1	-2	-30	-7	-45	-8	-4	2	10	1	10	-5	-4	-6	-4	0	1	2	-5	79	-2	-32	-6	-7	-6	-2	-11	-9	-8	-4	-1	-3	2	-4	4	6	-28	-3	-23	8	-8	-2	-8	-9	-4
53.62	-2	-7	-40	-31	1	-1	-29	-6	-43	-8	-4	2	11	1	10	-4	-3	-5	-4	0	1	2	-4	79	-1	-32	-7	-7	-6	-1	-12	-9	-8	-4	-1	-1	2	-5	4	6	-34	-3	-23	10	-8	0	-9	-8	-6
53.62	-3	-8	-42	-32	2	-2	-30	-6	-43	-8	-4	2	11	1	10	-5	-3	-6	-4	0	1	0	-4	79	-2	-32	-7	-8	-6	-2	-12	-7	-8	-4	-1	-1	1	-5	5	6	-34	-4	-23	11	-8	-3	-8	-9	-5
60.8	-3	-8	-44	-33	2	-1	-30	-6	-43	-8	-5	3	12	1	11	-5	-3	-6	-4	0	1	2	-4	79	-2	-31	-7	-8	-6	-1	-13	-9	-8	-5	-1	-1	2	-5	5	6	-35	-4	-24	9	-9	-1	-8	-10	-3
60.75	-2	-9	-45	-34	2	-1	-29	-6	-42	-8	-4	3	13	1	11	-4	-3	-6	-4	0	1	1	-4	79	-1	-32	-7	-8	-7	-2	-13	-8	-7	-5	-1	0	2	-5	5	6	-49	-4	-25	19	-9	-2	-6	-10	-6
67.28	-2	-7	-48	-37	3	-1	-28	-6	-43	-8	-5	3	13	2	12	-5	-3	-6	-4	0	1	2	-4	79	-2	-32	-7	-8	-6	-2	-13	-8	-7	-5	-1	0	2	-5	5	7	-37	-4	-23	10	-8	-1	-8	-10	-6
67.28	-2	-8	-51	-40	3	-1	-28	-6	-42	-8	-5	3	15	2	13	-5	-3	-6	-4	0	0	2	-4	79	-1	-32	-7	-9	-7	-2	-14	-8	-7	-5	0	-1	2	-5	5	8	-35	-4	-23	11	-9	-3	-6	-11	-5
81.11	-1	-10	-55	-43	4	-1	-28	-6	-44	-8	-5	4	16	2	14	-5	-4	-6	-4	1	1	2	-4	78	-2	-32	-8	-10	-7	-2	-15	-10	-7	-5	0	-1	2	-5	5	8	-34	-4	-23	10	-10	-3	-6	-11	-5
87.53	-2	-8	-61	-49	4	-1	-28	-7	-45	-8	-5	4	17	3	15	-6	-4	-6	-4	1	0	2	-4	78	-2	-32	-8	-11	-8	-2	-17	-9	-7	-6	-1	0	2	-5	5	9	-35	-3	-24	10	-8	-3	-7	-8	-8
101.41	-1	-8	-70	-61	5	0	-27	-6	-45	-8	-6	6	20	4	19	-6	-4	-6	-4	1	0	2	-3	77	-1	-32	-9	-12	-8	-2	-19	-8	-7	-7	0	-1	2	-5	6	11	-29	-3	-22	9	-6	-2	-7	-12	-4
107.84	0	-12	-76	-70	6	1	-26	-6	-44	-8	-5	6	22	3	21	-7	-4	-6	-5	2	0	3	-3	77	-2	-32	-9	-13	-9	-3	-22	-7	-8	-8	1	-1	2	-5	6	12	-28	-3	-23	8	-10	-2	-8	-13	-7
114.26	2	-12	-84	-81	8	2	-25	-6	-46	-8	-6	7	24	5	23	-7	-4	-6	-4	2	0	2	-2	77	-1	-32	-9	-15	-10	-3	-24	-8	-7	-8	1	0	3	-6	7	14	-23	-3	-22	10	-8	-4	-6	-13	-8
128.14	2	-16	-92	-92	8	3	-25	-6	-45	-8	-6	8	27	5	26	-7	-4	-6	-4	2	0	3	-2	76	-2	-32	-10	-16	-10	-3	-26	-8	-6	-9	1	0	3	-6	7	16	-35	-3	-23	9	-9	-4	-3	-15	-7
134.62	2	-14	-101	-104	10	4	-25	-6	-45	-8	-6	9	29	6	29	-7	-4	-6	-5	3	0	3	-1	76	-2	-32	-10	-18	-11	-3	-28	-6	-6	-10	2	0	3	-6	8	17	-32	-2	-22	8	-7	-2	-8	-17	-7
141.86	3	-16	-108	-114	10	4	-25	-6	-46	-8	-6	9	32	7	31	-8	-4	-6	-4	3	0	3	-1	76	-2	-32	-11	-19	-12	-4	-29	-8	-6	-10	2	0	3	-6	9	18	-40	-2	-21	11	-6	-4	-6	-15	-5
148.45	4	-14	-115	-122	11	6	-25	-6	-48	-8	-6	10	34	8	33	-8	-3	-6	-5	3	-1	3	-1	75	-2	-32	-12	-20	-12	-4	-31	-9	-6	-11	2	0	3	-6	9	19	-40	-2	-20	8	-5	-5	-5	-16	-8
154.93	4	-20	-121	-130	12	6	-25	-6	-46	-8	-6	11	35	7	35	-8	-4	-6	-5	3	-1	4	-1	75	-2	-32	-12	-21	-12	-4	-33	-7	-7	-12	3	0	3	-7	9	20	-33	-2	-20	10	-7	-4	-6	-19	-6
162.11	4	-11	-126	-138	12	6	-24	-6	-45	-8	-6	11	37	8	36	-8	-4	-6	-5	4	-1	4	0	75	-1	-32	-13	-22	-13	-4	-34	-8	-5	-11	3	0	3	-7	10	21	-38	-2	-21	6	-3	-4	-7	-16	-7
162.11	6	-13	-130	-143	13	6	-24	-6	-45	-8	-6	12	38	8	38	-9	-4	-6	-5	4	-1	4	0	75	-2	-32	-12	-23	-13	-4	-34	-9	-6	-13	3	0	4	-7	10	22	-26	-1	-22	6	-4	-2	-4	-20	-9
168.7	5	-18	-136	-149	14	7	-24	-6	-40	-8	-6	12	40	9	40	-9	-4	-6	-5	4	-1	4	0	75	-1	-32	-13	-23	-14	-4	-37	-5	-5	-13	3	0	4	-7	10	23	-27	-1	-22	11	-6	-3	-5	-19	-7
175.18	7	-19	-140	-154	15	8	-21	-6	-42	-8	-6	13	41	9	41	-9	-3	-6	-5	4	-1	4	1	75	-1	-32	-13	-24	-13	-4	-37	-6	-5	-13	4	0	4	-7	11	23	-25	-1	-22	9	-5	-4	-6	-20	-5
175.23	6	-21	-144	-158	15	8	-20	-6	-42	-8	-6	13	43	9	42	-9	-4	-6	-5	5	-1	4	1	75	-1	-32	-14	-25	-14	-5	-39	-5	-5	-13	4	0	4	-7	10	25	-22	-1	-23	8	-7	-3	-6	-19	-7
182.41	7	-17	-149	-163	17	9	-21	-6	-41	-8	-6	13	44	10	44	-10	-4	-6	-5	5	-1	4	1	74	-1	-32	-14	-25	-14	-4	-40	-6	-5	-14	4	-1	4	-7	11	25	-27	-1	-22	9	-5	-3	-7	-19	-7
189	8	-21	-152	-166	17	9	-21	-6	-41	-8	-7	14	45	10	45	-10	-4	-6	-5	5	-1	4	1	74	-2	-33	-14	-25	-15	-4	-41	-6	-5	-14	4	0	4	-7	11	26	-30	-1	-21	11	-6	-4	-5	-19	-8
188.95	8	-21	-155	-169	17	9	-21	-6	-43	-8	-6	14	46	10	46	-10	-4	-7	-5	5	-1	4	2	74	-1	-33	-14	-26	-15	-5	-41	-5	-5	-14	4	0	4	-7	11	26	-43	-1	-20	5	-5	-5	-6	-22	-7
188.95	8	-18	-158	-172	18	9	-21	-6	-44	-8	-7	15	47	11	47	-10	-4	-7	-5	5	-2	4	1	73	-1	-33	-14	-27	-15	-5	-42	-6	-4	-15	4	-1	4	-7	12	26	-25	-1	-19	7	-3	-2	-6	-20	-7
195.48	9	-22	-160	-174	18	10	-22	-6	-41	-8	-7	15	47	11	47	-10	-4	-6	-5	5	-2	4	2	73	-1	-33	-14	-27	-15	-5	-42	-7	-5	-15	4	-1	4	-7	12	27	-27	-1	-20	9	-4	-4	-6	-22	-7
195.48	8	-17	-163	-177	18	10	-22	-6	-41	-9	-7	15	48	10	48	-11	-4	-7	-6	5	-2	4	1	73	-2	-33	-16	-27	-16	-5	-43	-6	-3	-15	4	0	3	-8	12	27	-26	-1	-19	7	-1	-3	-6	-20	-7
195.43	8	-18	-164	-179	18	10	-23	-6	-43	-8	-7	15	49	11	49	-10	-4	-7	-5	5	-2	4	1	73	-2	-33	-16	-28	-16	-5	-44	-6	-4	-15	5	0	4	-8	12	27	-28	-1	-20	7	-3	-6	-5	-21	-9
202.61	8	-19	-165	-180	18	10	-23	-6	-42	-8	-6	15	49	11	49	-11	-4	-6	-5	5	-2	4	2	73	-1	-33	-16	-28	-16	-5	-44	-6	-4	-15	5	0	4	-7	12	28	-29	-1	-21	6	-4	-4	-5	-22	-5
202.61	8	-22	-170	-184	18	10	-24	-6	-44	-9	-7	15	50	11	49	-11	-5	-7	-6	5	-2	5	1	72	-1	-33	-17	-28	-16	-5	-45	-8	-3	-15	5	0	4	-8	13	28	-37	-1	-15	7	-3	-3	-7	-21	-9
202.61	8	-22	-170	-184	18	9	-28	-6	-45	-9	-7	15	50	11	50	-11	-4	-7	-6	5	-2	5	1	72	-1	-33	-17	-28	-16	-5	-44	-8	-4	-15	5	0	4	-8	13	28	-35	-1	-16	8	-2	-2	-6	-20	-8
202.61	8	-22	-170	-183	18	10	-28	-6	-44	-9	-7	16	50	11	50	-11	-5	-7	-6	6	-2	5	1	71	-1	-33	-17	-29	-16	-5	-45	-8	-3	-15	5	0	4	-8	13	28	-32	-1	-18	7	-2	-3	-7	-20	-9
202.61	8	-25	-170	-184	18	10	-28	-7	-43	-9	-7	15	50	11	50	-11	-5	-7	-6	6	-2	5	2	72	-1	-33	-17	-28	-17	-5	-45	-6	-4	-15	5	0	4	-8	13	28	-30	-1	-19	10	-5	-2	-4	-21	-9
202.61	8	-21	-170	-184	18	10	-28	-6	-44	-9	-7	15	50	11	50	-11	-4	-7	-5	5	-2	4	2	72	-1	-34	-16	-28	-16	-5	-44	-6	-4	-15	5	0	4	-8	13	28	-31	-1	-19	10	-3	-5	-6	-21	-8
202.61	9	-19	-169	-183	19	10	-28	-6	-42	-9	-7	15	50	11	50	-11	-4	-6	-6	6	-2	5	1	71	-1	-33	-16	-28	-16	-5	-45	-8	-4	-15	6	0	4	-8	13	28	-21	-1	-21	9	-3	-5	-6	-19	-9
195.43	9	-23	-169	-183	19	10	-29	-6	-41	-9	-7	16	50	11	50	-11	-4	-7	-6	6	-2	5	1	72	-1	-33	-17	-28	-16	-5	-44	-8	-3	-15	6	0	4	-8	12	28	-2	-1	-19	9	-3	-4	-7	-20	-10
195.48	9	-19	-170	-183	18	10	-29	-6	-41	-9	-7	15	50	11	50	-11	-4	-7	-6	6	-2	5	1	71	-1	-33	-17	-28	-16	-5	-44	-7	-3	-15	5	-1	4	-8	13	28	-18	-1	-18	7	-2	-3	-5	-21	-9
195.43	9	-22	-169	-183	19	10	-29	-6	-41	-8	-7	15	50	11	50	-10	-4	-7	-5	5	-2	4	1	72	-1	-33	-16	-28	-16	-5	-44	-7	-4	-15	5	0	4	-8	12	28	-27	-1	-19	8	-3	-3	-7	-21	-8
195.48	9	-20	-169	-183	19	10	-28	-6	-39	-8	-7	16	50	12	50	-11	-4	-7	-6	5	-2	4	2	71	-2	-33	-17	-28	-16	-5	-45	-6	-5	-15	5	0	4	-9	13	28	-29	-1	-20	9	-2	-4	-6	-21	-8
195.43	9	-22	-169	-183	19	10	-28	-6	-38	-8	-6	15	50	11	50	-11	-4	-7	-6	6	-2	5	2	71	-1	-34	-17	-28	-16	-5	-44	-6	-3	-15	6	-1	4	-9	13	28	-28	-1	-20	8	-5	-3	-7	-21	-8
188.95	8	-21	-169	-183	19	10	-28	-6	-37	-9	-7	15	50	11	50	-11	-4	-7	-6	6	-2	5	1	71	-1	-34	-17	-28	-16	-5	-45	-8	-4	-15	5	0	4	-8	13	28	-25	-1	-20	8	-2	-4	-6	-21	-7
182.36	8	-22	-169	-183	18	10	-29	-6	-36	-9	-7	15	50	11	50	-11	-4	-7	-6	6	-2	5	1	71	-1	-34	-16	-28	-16	-5	-44	-4	-5	-16	5	0	3	-9	12	28	-31	-1	-20	9	-4	-3	-7	-20	-9
168.64	8	-21	-168	-182	18	10	-29	-6	-37	-9	-7	15	49	11	49	-11	-4	-7	-6	5	-2	4	1	71	-1	-34	-16	-28	-16	-5	-44	-6	-5	-15	5	-1	4	-9	12	27	-30	-1	-20	11	-4	-5	-5	-23	-7
162.05	8	-18	-167	-181	18	9	-29	-6	-38	-9	-6	15	49	11	49	-10	-4	-7	-5	6	-2	4	1	71	-1	-34	-16	-28	-16	-5	-43	-6	-6	-15	5	-1	4	-8	12	27	-44	-1	-22	7	-3	-5	-4	-23	-7
154.82	7	-22	-162	-175	17	9	-30	-6	-36	-9	-7	14	47	10	46	-10	-4	-7	-6	5	-2	4	0	71	-1	-34	-16	-26	-15	-5	-42	-7	-5	-14	5	-1	3	-8	12	25	-29	-2	-21	8	-6	-7	-7	-22	-8
141.86	6	-20	-157	-169	15	8	-30	-6	-37	-9	-6	14	44	10	44	-10	-4	-7	-5	5	-2	4	0	71	-2	-34	-14	-25	-15	-5	-39	-9	-5	-14	5	-1	3	-8	11	22	-24	-1	-22	13	-6	-2	-6	-22	-9
128.09	6	-21	-149	-161	14	7	-30	-6	-35	-9	-6	13	42	9	41	-9	-4	-7	-5	4	-2	4	-1	71	-1	-34	-14	-24	-14	-4	-38	-6	-5	-12	5	-1	3	-8	11	22	-29	-2	-23	9	-7	-3	-8	-20	-6
121.55	5	-16	-141	-152	13	6	-31	-6	-34	-9	-6	12	39	8	39	-9	-4	-7	-5	4	-1	3	-1	71	-1	-34	-13	-22	-13	-5	-35	-7	-6	-12	4	-1	2	-8	10	21	-31	-2	-23	11	-5	-4	-6	-20	-8
107.78	4	-18	-136	-146	12	6	-32	-6	-34	-9	-6	11	37	8	36	-9	-4	-8	-5	3	-2	3	-2	72	-2	-34	-13	-21	-13	-5	-34	-8	-7	-11	3	-1	3	-8	10	20	-30	-2	-24	9	-6	-4	-7	-18	-8
101.36	3	-17	-129	-138	10	5	-32	-7	-33	-9	-6	10	35	7	34	-8	-4	-8	-5	3	-2	3	-2	71	-2	-34	-12	-21	-12	-4	-32	-7	-7	-11	3	-1	3	-7	10	19	-36	-2	-23	9	-7	-4	-7	-19	-10
94.07	3	-16	-122	-127	10	4	-32	-6	-34	-9	-6	10	33	7	32	-8	-4	-7	-5	3	-1	3	-3	72	-2	-34	-12	-19	-12	-4	-30	-7	-6	-11	2	-1	2	-8	9	17	-32	-3	-24	7	-5	-5	-6	-19	-7
81.05	2	-16	-114	-116	9	3	-33	-6	-32	-9	-6	9	31	6	29	-8	-4	-8	-5	3	-1	3	-3	72	-2	-34	-11	-18	-11	-4	-28	-8	-7	-10	2	-1	2	-7	8	15	-31	-3	-23	10	-7	-2	-8	-14	-7
60.75	0	-13	-103	-100	7	2	-33	-7	-32	-9	-6	8	27	5	25	-7	-4	-7	-5	2	-1	2	-3	72	-1	-35	-10	-15	-10	-4	-25	-10	-6	-9	1	-1	2	-7	8	13	-31	-4	-23	11	-8	-4	-7	-15	-9
47.03	-1	-14	-93	-87	6	1	-34	-7	-32	-3	5	7	24	7	23	-7	3	-8	-5	1	-1	2	-4	72	-2	-34	-10	-14	-9	-4	-23	-12	-7	-8	1	-2	2	-7	7	11	-41	-4	-23	11	-8	-2	-8	-15	-6
33.32	-2	-11	-84	-76	5	0	-34	-7	-33	-3	4	6	22	6	21	-6	2	-8	-5	1	-1	2	-5	73	-2	-34	-10	-13	-9	-3	-21	-11	-7	-7	1	-2	2	-7	6	10	-39	-4	-25	16	-8	-1	-9	-14	-7
6.53	-3	-8	-71	-59	4	-1	-35	-7	-32	-3	4	5	18	5	17	-6	1	-8	-5	0	-1	2	-5	72	-2	-34	-9	-11	-8	-3	-17	-13	-7	-6	0	-2	1	-7	6	7	-51	-5	-25	9	-7	-3	-8	-12	-6
-0.05	-4	-9	-61	-48	1	-2	-36	-7	-31	-3	4	4	16	4	14	-6	1	-8	-5	-1	-1	1	-6	73	-2	-34	-9	-10	-7	-3	-15	-12	-8	-6	0	-2	1	-7	5	6	-42	-4	-24	9	-8	-3	-8	-11	-8
-0.05	-5	-12	-43	-33	0	-3	-36	-7	-31	-4	4	2	10	3	9	-5	0	-8	-4	-1	0	0	-6	73	-2	-34	-8	-7	-7	-3	-12	-13	-8	-4	-1	-2	1	-6	4	4	-42	-5	-22	10	-11	-2	-9	-9	-5
26.73	-6	-10	-42	-32	-1	-3	-36	-7	-30	-4	4	2	9	2	10	-5	0	-8	-4	-1	-1	0	-7	73	-2	-34	-7	-7	-6	-2	-12	-14	-8	-4	-1	-2	1	-6	4	4	-44	-4	-23	10	-9	-2	-8	-9	-6
33.32	-7	-14	-41	-33	-1	-3	-36	-8	-29	-4	4	2	10	3	9	-5	0	-8	-5	-1	-1	0	-7	72	-3	-34	-8	-8	-6	-3	-12	-13	-7	-4	-1	-2	1	-6	4	4	-43	-5	-24	9	-10	-3	-9	-7	-7
33.32	-6	-8	-42	-32	0	-3	-36	-7	-31	-4	3	2	10	2	10	-5	0	-8	-4	-1	0	0	-6	73	-2	-34	-8	-8	-6	-3	-12	-12	-8	-4	-1	-2	1	-6	5	5	-35	-5	-23	10	-9	-3	-9	-9	-4
38.56	-5	-9	-42	-33	0	-3	-36	-7	-31	-4	4	2	10	3	10	-5	0	-8	-4	-1	0	0	-6	73	-2	-34	-7	-8	-6	-3	-12	-14	-7	-4	0	-2	1	-6	4	4	-37	-5	-23	14	-9	-1	-10	-10	-5
40.5	-5	-9	-43	-33	0	-3	-36	-7	-31	-4	4	2	10	3	11	-5	0	-8	-4	0	0	0	-6	72	-2	-34	-7	-8	-7	-3	-13	-12	-8	-4	0	-2	1	-6	4	4	-37	-5	-23	10	-9	-4	-8	-9	-5
47.09	-6	-10	-44	-34	0	-3	-36	-7	-30	-4	4	2	11	3	11	-5	0	-8	-5	-1	-1	1	-6	72	-2	-34	-7	-8	-7	-2	-13	-11	-9	-5	-1	-2	1	-6	4	5	-40	-5	-24	11	-9	-3	-8	-10	-5
47.03	-5	-8	-45	-34	0	-3	-36	-7	-29	-4	3	2	11	4	11	-5	0	-8	-4	0	0	1	-6	72	-2	-34	-8	-8	-7	-2	-13	-10	-8	-5	0	-2	1	-6	5	5	-39	-5	-24	10	-9	-3	-8	-10	-6
53.62	-6	-10	-48	-37	0	-3	-36	-7	-29	-4	3	3	13	3	12	-5	0	-8	-4	0	0	1	-6	73	-2	-34	-8	-8	-6	-2	-14	-11	-8	-5	0	-2	1	-7	5	6	-35	-5	-24	10	-9	-3	-8	-10	-6
60.8	-6	-11	-50	-38	0	-3	-35	-7	-29	-4	3	3	13	3	12	-5	0	-8	-5	0	-1	0	-6	73	-2	-34	-8	-9	-7	-2	-14	-11	-9	-4	0	-2	1	-3	5	6	-37	-5	-25	11	-10	-1	-9	-12	-7
60.8	-6	-9	-52	-40	1	-3	-35	-7	-27	-4	3	3	14	4	13	-5	0	-8	-4	0	-1	2	-6	72	-2	-34	-8	-9	-7	-3	-15	-12	-8	-5	0	-2	1	-3	5	6	-34	-5	-24	8	-8	-2	-10	-11	-8
67.28	-5	-11	-56	-42	1	-2	-35	-7	-28	-4	3	4	15	4	14	-6	0	-8	-5	0	-1	2	-6	73	-2	-34	-8	-9	-7	-3	-15	-11	-7	-5	0	-2	2	-3	6	7	-36	-5	-24	12	-10	-2	-10	-11	-5
73.82	-5	-9	-59	-45	2	-2	-35	-7	-28	-4	3	4	16	5	15	-6	0	-8	-4	0	-1	0	-6	72	-2	-34	-8	-10	-8	-3	-16	-11	-8	-6	0	-2	2	-4	6	8	-35	-4	-24	10	-8	-3	-8	-12	-6
81.11	-4	-10	-66	-52	3	-2	-35	-7	-27	-4	3	4	18	5	17	-6	-1	-8	-4	0	-1	2	-5	72	-1	-34	-9	-11	-8	-3	-18	-12	-6	-6	1	-2	1	-4	6	8	-35	-5	-24	8	-9	-3	-8	-13	-6
87.53	-4	-10	-71	-59	3	-1	-35	-7	-26	-4	2	5	19	5	19	-6	-1	-8	-5	1	-1	2	-5	72	-2	-33	-10	-12	-9	-3	-19	-11	-7	-7	1	-2	2	-4	7	10	-36	-4	-24	9	-8	-2	-7	-13	-7
90.5	-4	-9	-76	-64	4	-1	-35	-7	-26	-4	2	5	20	5	20	-6	0	-8	-5	1	-1	2	-5	71	-2	-34	-10	-12	-9	-3	-21	-11	-7	-7	2	-2	2	-4	7	10	-37	-4	-24	12	-7	-5	-7	-12	-6
94.07	-3	-13	-81	-73	5	0	-35	-7	-26	-4	2	6	22	6	21	-7	0	-8	-5	1	-1	2	-4	72	-2	-34	-10	-13	-9	-3	-22	-10	-7	-8	2	-2	2	-4	7	11	-33	-4	-24	9	-8	-1	-8	-14	-6
107.84	-3	-11	-87	-81	5	1	-35	-7	-26	-4	2	7	25	7	24	-6	0	-8	-5	1	-1	2	-4	71	-2	-34	-10	-14	-10	-3	-24	-11	-6	-8	2	-2	3	-4	7	13	-31	-4	-24	9	-6	-3	-8	-14	-7
114.32	-2	-11	-95	-91	6	1	-35	-7	-27	-4	2	8	27	7	26	-7	0	-8	-5	2	-2	3	-4	71	-2	-34	-11	-15	-10	-4	-26	-8	-7	-9	2	-2	2	-4	8	14	-32	-4	-24	9	-6	-3	-7	-13	-8
121.61	-1	-10	-100	-99	7	2	-34	-7	-26	-4	2	9	29	8	28	-7	-1	-8	-5	2	-2	3	-3	71	-2	-34	-11	-16	-11	-3	-27	-10	-6	-10	3	-2	2	-4	9	15	-36	-3	-24	7	-5	-3	-7	-14	-7
128.2	0	-15	-107	-110	8	3	-34	-7	-24	-4	2	9	31	9	30	-8	0	-9	-5	3	-2	3	-3	71	-2	-34	-12	-18	-11	-3	-29	-8	-6	-10	4	-2	3	-4	9	17	-29	-3	-24	9	-8	-3	-7	-16	-7
141.91	0	-16	-116	-121	9	3	-34	-7	-25	-4	2	10	33	9	33	-8	0	-8	-5	3	-2	3	-3	71	-1	-34	-12	-19	-12	-3	-31	-7	-7	-11	4	-2	3	-5	10	19	-29	-3	-24	9	-7	-4	-7	-16	-8
148.45	1	-14	-123	-129	10	4	-34	-7	-25	-4	2	11	35	9	35	-8	-1	-8	-5	3	-2	3	-2	70	-1	-34	-12	-21	-13	-4	-32	-8	-6	-11	4	-1	4	-5	10	20	-29	-2	-24	6	-4	-5	-7	-18	-8
154.93	2	-16	-128	-138	11	5	-34	-7	-25	-4	2	11	37	10	37	-9	-1	-8	-5	3	-2	4	-2	70	-2	-34	-13	-21	-13	-4	-34	-6	-6	-12	5	-1	3	-5	10	21	-30	-2	-24	8	-6	-4	-8	-17	-8
162.11	2	-16	-134	-145	12	6	-34	-7	-24	-4	1	12	39	11	39	-9	-1	-8	-6	4	-2	4	-2	70	-1	-34	-13	-22	-13	-4	-35	-7	-6	-12	5	-1	3	-5	11	22	-24	-2	-23	9	-5	-3	-7	-20	-7
168.7	2	-22	-140	-153	12	6	-33	-7	-24	-4	2	12	41	11	41	-9	-1	-8	-5	4	-2	4	-1	70	-2	-34	-13	-23	-14	-4	-37	-6	-6	-13	5	-1	4	-2	11	23	-22	-2	-23	9	-8	-5	-6	-19	-9
175.23	3	-19	-147	-160	14	6	-32	-6	-23	-4	1	14	43	12	44	-10	-1	-8	-5	5	-2	4	-1	70	-1	-34	-14	-24	-14	-4	-39	-6	-5	-14	5	-1	4	-1	11	25	-19	-2	-13	7	-6	-4	-6	-18	-9
182.41	4	-18	-154	-167	15	8	-32	-6	-24	-4	1	14	45	12	46	-10	-1	-8	-6	5	-2	5	0	69	-2	-34	-14	-25	-15	-4	-41	-6	-5	-14	6	-1	4	-2	12	25	-38	-1	-15	7	-4	-4	-6	-20	-8
189	5	-23	-159	-173	15	8	-32	-6	-24	-4	1	15	48	13	48	-10	-1	-8	-5	5	-2	5	0	70	-1	-34	-16	-26	-15	-4	-42	-5	-4	-14	7	-1	5	-2	13	27	-25	-1	-13	8	-6	-5	-8	-20	-8
195.48	5	-23	-164	-178	17	8	-32	-6	-22	-4	1	16	49	13	50	-10	-1	-8	-6	5	-2	5	0	69	-1	-34	-16	-27	-16	-5	-43	-4	-5	-15	7	-1	4	-2	13	27	-20	-1	-11	7	-6	-4	-7	-21	-9
202.61	6	-25	-169	-183	17	9	-32	-6	-23	-3	1	16	51	14	52	-10	-1	-8	-5	5	-3	5	1	69	-1	-34	-16	-28	-16	-5	-45	-5	-5	-15	7	-1	5	-2	13	29	-15	-1	-10	7	-5	-4	-7	-21	-9
209.14	7	-23	-174	-189	19	10	-31	-6	-22	-4	1	17	53	14	54	-10	-1	-8	-5	6	-3	5	1	69	-1	-34	-17	-28	-16	-5	-46	-4	-4	-16	7	-1	5	-2	14	29	-15	-1	-12	7	-5	-5	-6	-25	-8
215.73	6	-22	-180	-196	19	10	-31	-6	-22	-4	1	18	55	15	56	-11	-1	-8	-6	6	-3	5	1	69	-1	-34	-18	-30	-17	-5	-47	-4	-4	-16	8	-1	5	-2	14	31	-16	-1	-12	8	-4	-4	-7	-23	-10
222.97	8	-25	-186	-202	21	11	-31	-6	-21	-3	1	18	57	15	58	-11	-1	-8	-6	6	-3	5	2	69	-2	-34	-18	-30	-17	-5	-49	-4	-4	-17	8	-1	5	-2	15	32	-14	0	-12	7	-5	-6	-6	-24	-6
229.45	8	-25	-192	-206	21	11	-31	-6	-21	-3	1	19	58	15	59	-12	-1	-8	-6	6	-3	5	2	68	-1	-34	-18	-32	-18	-5	-50	-3	-4	-17	8	-1	5	-3	15	32	-13	0	-11	9	-5	-5	-6	-23	-9
235.98	9	-22	-197	-211	22	12	-31	-6	-22	-3	1	19	60	16	61	-12	-1	-8	-5	7	-3	6	2	68	-1	-34	-18	-33	-18	-5	-52	-3	-5	-18	9	-1	5	-3	15	33	-16	0	-12	11	-3	-5	-5	-24	-10
249.7	10	-26	-203	-217	23	13	-31	-6	-22	-4	0	20	63	16	64	-12	-1	-8	-5	7	-3	6	2	68	-2	-34	-18	-34	-19	-6	-53	-3	-3	-18	8	-1	5	-3	15	34	-17	0	-11	7	-5	-5	-6	-24	-10
256.18	11	-25	-210	-222	24	14	-30	-6	-22	-3	0	21	66	17	66	-12	-1	-8	-6	7	-3	6	3	68	-1	-34	-19	-35	-20	-6	-55	-3	-3	-19	8	-1	5	-3	16	36	-8	0	-12	8	-2	-7	-4	-27	-9
263.52	11	-28	-217	-228	25	14	-30	-6	-21	-4	0	22	68	17	68	-13	-1	-8	-6	8	-4	6	3	68	-1	-34	-20	-36	-19	-6	-56	-4	-2	-20	9	-1	5	-3	16	37	-13	0	-13	7	-4	-7	-4	-28	-11
269.95	11	-28	-221	-232	26	14	-30	-6	-23	-3	0	22	69	17	69	-13	-1	-8	-6	8	-4	6	4	68	-1	-34	-20	-37	-20	-6	-58	-2	-3	-20	9	-1	5	-4	16	38	-8	0	-14	6	-4	-6	-6	-29	-9
276.48	12	-28	-226	-236	27	15	-30	-6	-22	-3	0	23	72	18	71	-13	-1	-8	-6	8	-4	6	4	67	-2	-34	-20	-37	-20	-6	-59	-2	-3	-20	9	-1	6	-4	16	39	-9	1	-14	7	-3	-7	-3	-30	-9
283.77	12	-29	-230	-240	27	15	-29	-6	-22	-4	0	23	74	18	72	-13	-1	-8	-6	8	-4	7	4	67	-1	-35	-21	-38	-21	-6	-60	-2	-2	-21	10	-1	6	-4	18	40	-13	0	-13	5	-3	-6	-5	-30	-11
290.3	12	-29	-236	-245	28	16	-30	-6	-21	-3	0	24	76	18	74	-14	-1	-7	-6	8	-4	6	5	67	-1	-35	-21	-39	-22	-6	-61	1	-3	-21	10	-1	6	-4	18	40	-7	0	-11	5	-2	-6	-6	-29	-11
296.68	13	-31	-242	-251	28	16	-30	-6	-21	-4	0	25	78	18	76	-14	-1	-7	-6	9	-4	6	5	67	-1	-34	-21	-40	-23	-6	-63	-2	-2	-22	10	-1	6	-5	18	41	-11	1	-11	6	0	-6	-6	-32	-10
296.73	13	-34	-246	-254	29	17	-30	-6	-21	-3	0	25	80	19	77	-14	-1	-8	-6	8	-5	7	5	67	-1	-34	-22	-41	-23	-7	-64	-2	-2	-22	10	-1	6	-4	19	42	-9	1	-12	7	-3	-6	-5	-33	-10
303.97	14	-34	-249	-255	30	17	-30	-6	-21	-3	0	25	81	19	78	-14	-1	-8	-6	9	-4	6	5	67	-1	-34	-22	-41	-23	-7	-64	-1	-1	-22	10	-1	6	-5	19	42	-11	1	-12	7	-3	-7	-6	-32	-10
303.97	14	-36	-250	-257	29	17	-31	-6	-20	-3	0	25	80	18	78	-14	-1	-8	-6	9	-5	7	5	67	-2	-35	-22	-41	-23	-7	-64	0	-3	-22	10	-1	6	-5	19	42	-8	1	-13	7	-4	-6	-6	-32	-10
303.97	14	-31	-251	-257	29	17	-30	-6	-20	-3	0	25	81	19	79	-14	-1	-7	-6	9	-4	7	5	67	-2	-34	-22	-42	-23	-7	-64	-3	-3	-22	10	-1	6	-5	19	42	-10	1	-13	6	0	-9	-4	-33	-11
303.97	13	-33	-255	-261	29	16	-32	-7	-24	-4	0	25	82	19	79	-14	-1	-4	-6	10	-4	7	6	66	-1	-34	-22	-41	-23	-6	-65	-1	-2	-22	11	-1	6	-4	20	42	-7	1	-8	3	-3	-8	-7	-32	-10
303.97	13	-36	-255	-261	29	17	-32	-7	-22	-4	0	26	82	19	79	-14	-1	-4	-6	9	-4	8	5	66	-1	-34	-22	-42	-24	-6	-65	-1	-2	-22	12	-1	7	-4	20	42	-24	1	-12	6	-4	-6	-7	-34	-10
283.77	13	-36	-254	-261	28	16	-32	-7	-23	-4	0	25	81	19	78	-14	-2	-4	-6	9	-4	7	5	67	-1	-35	-22	-42	-23	-7	-64	-4	-1	-22	11	-1	6	-5	20	42	-9	1	-14	6	-3	-7	-5	-35	-10
263.52	13	-31	-252	-258	28	16	-32	-6	-20	-4	-1	25	80	18	77	-14	-1	-4	-6	9	-4	7	5	67	-1	-35	-21	-41	-23	-6	-63	-4	-2	-21	12	-1	6	-5	20	41	-9	1	-14	4	-2	-9	-5	-34	-11
209.09	9	-29	-228	-236	23	12	-34	-6	-21	-5	-1	21	68	16	67	-13	-2	-4	-6	8	-4	6	3	67	-1	-35	-19	-34	-19	-5	-55	-6	-2	-18	10	-1	5	-4	18	35	-19	0	-14	3	-3	-8	-9	-28	-11
182.3	7	-29	-208	-218	19	10	-35	-7	-21	-5	0	19	60	15	60	-12	-2	-3	-6	6	-3	6	1	68	-1	-35	-18	-31	-18	-5	-50	-4	-4	-17	9	-1	5	-4	15	31	-22	0	-15	6	-5	-6	-10	-25	-13
141.8	4	-25	-182	-193	14	7	-37	-7	-21	-5	0	16	51	13	50	-10	-2	-4	-6	5	-3	5	0	68	-1	-35	-16	-27	-16	-4	-42	-7	-4	-14	7	-1	5	-3	13	26	-22	-2	-15	6	-5	-7	-7	-26	-10
107.78	2	-23	-160	-169	11	5	-38	-7	-22	-5	1	12	43	11	43	-9	-2	-4	-5	4	-2	4	-2	69	-1	-35	-13	-23	-14	-3	-37	-8	-6	-12	5	-2	4	-3	11	21	-28	-2	-15	8	-8	-4	-9	-23	-11
73.76	0	-18	-140	-146	8	3	-40	-8	-23	-5	1	11	37	9	36	-8	-1	-4	-5	3	-2	4	-2	69	-1	-35	-12	-20	-12	-3	-32	-10	-5	-10	4	-2	4	-3	10	18	-44	-3	-16	6	-5	-7	-8	-21	-9
60.75	-2	-20	-124	-124	6	1	-41	-8	-22	-5	1	9	32	8	31	-8	-1	-4	-5	3	-2	4	-3	70	-1	-35	-11	-18	-11	-3	-28	-11	-5	-9	3	-2	3	-2	9	15	-43	-2	-19	8	-8	-5	-11	-18	-9
40.45	-3	-17	-109	-104	4	-1	-41	-7	-20	-6	1	8	28	7	26	-7	-2	-4	-5	2	-1	3	-4	70	-1	-35	-10	-14	-10	-3	-24	-11	-6	-8	3	-2	3	-3	9	12	-35	-4	-18	18	-9	-4	-10	-17	-9
-0.05	-4	-13	-91	-79	2	-2	-42	-8	-20	-5	2	6	22	6	21	-6	-2	-4	-4	2	-1	3	-5	70	-1	-35	-9	-12	-9	-2	-21	-9	-7	-6	2	-2	3	-2	7	10	-37	-4	-19	7	-9	-6	-11	-14	-9
-0.11	-7	-16	-74	-60	0	-4	-43	-8	-19	-6	2	4	18	4	16	-6	-2	-4	-5	1	-1	2	-5	70	-1	-35	-8	-10	-8	-2	-17	-12	-7	-5	1	-2	2	-2	7	8	-37	-5	-18	9	-11	-4	-12	-13	-9
6.48	-7	-12	-62	-49	-2	-5	-43	-8	-17	-6	2	3	15	3	13	-5	-2	-4	-4	0	-1	2	-6	70	-1	-35	-8	-9	-7	-3	-14	-13	-6	-5	1	-3	2	-2	6	6	-40	-5	-18	6	-10	-4	-10	-12	-9
6.48	-8	-12	-58	-45	-2	-5	-43	-8	-19	-6	2	3	14	3	12	-5	-2	-4	-4	0	-1	2	-6	70	-1	-35	-8	-8	-7	-2	-14	-12	-7	-4	1	-3	2	-2	6	5	-45	-5	-20	7	-9	-3	-11	-14	-7
40.5	-9	-12	-57	-45	-2	-5	-44	-8	-19	-6	2	3	14	3	12	-5	-2	-4	-5	0	-1	2	-7	70	-2	-35	-8	-9	-7	-2	-14	-13	-7	-4	1	-3	2	-2	5	6	-36	-5	-19	8	-10	-3	-11	-12	-9
47.03	-7	-14	-57	-45	-2	-5	-43	-8	-17	-6	2	3	14	3	13	-5	-2	-4	-4	0	-1	2	-6	71	-2	-35	-8	-9	-7	-3	-14	-13	-7	-4	1	-3	2	-3	6	6	-41	-5	-20	10	-11	-2	-11	-11	-8
47.03	-8	-12	-58	-46	-2	-4	-44	-8	-16	-6	2	3	14	3	13	-5	-2	-5	-4	0	-1	2	-6	70	-2	-34	-8	-9	-8	-2	-14	-9	-8	-4	1	-3	2	-2	6	6	-42	-5	-20	8	-11	-5	-12	-11	-9
53.57	-9	-11	-60	-47	-2	-5	-43	-8	-17	-6	2	3	15	4	14	-5	-2	-4	-4	0	-1	2	-6	71	-1	-34	-8	-9	-7	-2	-15	-12	-7	-5	1	-3	2	-2	6	7	-44	-5	-19	8	-9	-6	-9	-13	-9
60.8	-7	-12	-61	-48	-1	-4	-43	-8	-17	-6	2	4	16	4	14	-5	-2	-4	-4	0	-1	2	-6	70	-1	-35	-8	-9	-8	-2	-15	-13	-7	-5	1	-3	2	-3	6	7	-43	-5	-20	12	-9	-5	-10	-14	-9
60.8	-7	-12	-63	-50	0	-4	-43	-8	-16	-6	2	4	17	4	15	-5	-2	-5	-4	1	-1	2	-6	70	-1	-35	-8	-10	-8	-2	-16	-13	-7	-5	1	-3	2	-2	6	7	-40	-5	-20	9	-10	-5	-8	-12	-6
67.28	-8	-13	-67	-52	0	-4	-43	-8	-16	-6	2	4	17	4	16	-6	-2	-4	-4	0	-1	3	-6	70	-1	-35	-9	-10	-8	-2	-16	-12	-7	-5	1	-3	2	-3	6	7	-37	-5	-19	9	-10	-4	-9	-14	-7
67.28	-7	-12	-70	-55	0	-4	-43	-8	-17	-6	1	4	18	4	16	-6	-2	-5	-5	1	-1	3	-6	70	-1	-34	-9	-11	-8	-2	-17	-11	-7	-6	1	-3	2	-3	7	8	-44	-5	-20	4	-8	-5	-9	-15	-8
73.82	-7	-15	-73	-59	1	-3	-43	-8	-16	-6	2	5	19	4	18	-6	-2	-4	-4	1	-1	2	-5	69	-1	-35	-9	-11	-8	-2	-18	-11	-6	-6	2	-3	2	-3	7	9	-38	-5	-20	8	-11	-3	-10	-15	-7
81.11	-7	-12	-77	-64	1	-3	-43	-8	-17	-6	1	5	20	5	19	-6	-2	-5	-4	1	-1	3	-6	70	-1	-35	-9	-12	-8	-3	-19	-10	-6	-6	1	-3	2	-3	7	10	-35	-4	-20	9	-8	-5	-10	-14	-7
81.11	-7	-12	-80	-69	1	-3	-43	-8	-18	-6	1	5	21	5	20	-6	-2	-4	-5	1	-2	2	-5	70	-1	-35	-9	-12	-9	-3	-19	-11	-6	-7	2	-3	2	-3	7	10	-34	-4	-20	8	-7	-5	-10	-15	-8
87.53	-5	-13	-84	-74	2	-2	-43	-8	-17	-6	1	6	22	6	21	-6	-2	-4	-4	2	-2	3	-5	69	-1	-34	-10	-13	-9	-3	-21	-10	-5	-7	2	-3	2	-3	8	11	-36	-4	-20	7	-7	-6	-10	-17	-8
87.53	-6	-13	-88	-78	3	-2	-43	-8	-17	-6	1	6	23	6	22	-6	-2	-4	-5	2	-2	3	-5	69	-1	-34	-10	-13	-10	-3	-22	-9	-6	-7	2	-3	3	-3	8	11	-38	-4	-21	7	-8	-6	-9	-16	-7
94.07	-6	-16	-92	-83	2	-2	-43	-8	-16	-6	1	6	24	6	23	-7	-2	-5	-5	2	-2	3	-5	69	-1	-35	-10	-14	-10	-3	-23	-9	-7	-7	2	-3	3	-3	8	11	-34	-5	-20	8	-9	-4	-10	-15	-9
94.07	-6	-15	-95	-87	3	-2	-42	-8	-16	-6	1	7	25	6	24	-7	-2	-5	-5	2	-2	3	-5	69	-1	-35	-10	-14	-10	-3	-24	-10	-6	-8	3	-3	3	-4	9	13	-37	-4	-20	9	-8	-6	-9	-16	-9
101.41	-4	-15	-97	-90	4	-1	-42	-8	-17	-6	1	8	26	6	25	-6	-2	-5	-5	2	-1	3	-4	69	-1	-34	-11	-15	-10	-3	-24	-11	-5	-8	4	-3	3	-3	9	13	-34	-4	-20	15	-8	-5	-10	-16	-9
107.84	-5	-16	-102	-98	4	-1	-42	-8	-16	-5	1	8	27	7	26	-7	-1	-5	-5	2	-2	3	-5	69	-1	-35	-11	-16	-11	-4	-26	-10	-6	-8	3	-3	2	-4	9	14	-30	-4	-20	5	-8	-5	-9	-18	-10
114.32	-5	-17	-106	-103	5	-1	-42	-8	-16	-6	1	8	29	7	27	-7	-2	-5	-5	2	-2	3	-4	68	-1	-35	-11	-16	-11	-4	-27	-8	-6	-9	3	-3	3	-4	9	15	-36	-4	-21	6	-8	-5	-8	-18	-9
128.14	-4	-18	-115	-116	6	0	-42	-8	-19	-6	0	9	31	7	30	-8	-2	-5	-5	3	-2	3	-4	68	-1	-35	-12	-18	-12	-4	-29	-11	-5	-10	4	-3	3	-4	10	16	-34	-4	-19	6	-5	-5	-9	-19	-8
128.2	-3	-23	-121	-123	7	1	-41	-8	-18	-6	0	9	32	8	32	-8	-2	-5	-5	3	-2	3	-3	68	-1	-35	-12	-19	-12	-4	-31	-9	-4	-10	3	-3	3	-4	10	17	-35	-4	-19	7	-9	-2	-11	-16	-10
134.62	-3	-20	-126	-129	7	1	-42	-8	-16	-6	1	10	34	9	33	-8	-2	-5	-6	3	-3	4	-3	67	-2	-35	-12	-20	-13	-4	-32	-9	-5	-11	4	-3	3	-4	10	18	-37	-3	-19	6	-7	-7	-9	-18	-10
134.62	-3	-24	-130	-137	7	2	-42	-8	-17	-6	0	10	35	9	35	-9	-2	-6	-6	3	-3	4	-4	67	-1	-35	-13	-21	-13	-4	-33	-10	-5	-11	5	-2	3	-4	10	19	-33	-4	-18	7	-8	-6	-10	-18	-9
141.86	-1	-17	-134	-140	8	2	-42	-8	-14	-6	0	11	36	9	36	-9	-2	-5	-5	4	-3	4	-3	67	-2	-35	-13	-21	-13	-5	-33	-9	-3	-11	5	-3	3	-5	11	19	-35	-3	-19	6	-4	-6	-8	-21	-9
141.86	-1	-22	-135	-143	8	2	-41	-8	-14	-6	0	11	36	9	37	-9	-2	-5	-6	3	-3	4	-4	67	-2	-35	-13	-22	-13	-5	-34	-8	-5	-12	4	-3	3	-4	10	19	-33	-3	-17	5	-8	-6	-9	-20	-11
148.45	-2	-22	-138	-146	9	2	-42	-8	-15	-6	0	11	37	9	37	-9	-2	-5	-6	3	-3	3	-4	67	-1	-36	-14	-22	-14	-4	-34	-10	-5	-12	3	-3	3	-5	10	20	-35	-4	-17	8	-7	-7	-7	-22	-7
148.45	-1	-19	-140	-150	9	3	-41	-8	-14	-6	0	11	38	10	38	-9	-2	-5	-6	3	-3	3	-3	67	-2	-36	-14	-23	-14	-4	-35	-8	-4	-12	4	-3	3	-5	11	20	-35	-4	-18	8	-6	-5	-7	-22	-7
154.87	-1	-24	-143	-153	9	3	-41	-8	-14	-6	0	12	39	10	39	-9	-2	-6	-6	4	-3	4	-3	67	-2	-36	-14	-24	-14	-4	-37	-6	-5	-12	5	-3	3	-5	11	21	-30	-3	-19	13	-7	-4	-10	-24	-11
162.05	-1	-25	-148	-158	10	4	-41	-8	-14	-6	-1	12	41	10	41	-10	-2	-5	-6	4	-3	4	-3	66	-2	-36	-14	-24	-15	-5	-38	-6	-6	-13	5	-3	3	-5	11	22	-26	-3	-19	7	-9	-5	-9	-22	-10
175.18	0	-22	-153	-165	10	4	-41	-8	-13	-6	-1	13	43	11	43	-10	-2	-5	-6	4	-4	4	-2	67	-2	-36	-16	-25	-16	-5	-40	-7	-6	-14	4	-3	3	-5	11	23	-25	-3	-20	6	-7	-6	-7	-22	-8
182.36	0	-21	-162	-174	12	5	-41	-8	-14	-6	0	14	46	11	46	-10	-2	-6	-6	5	-3	4	-2	66	-2	-35	-17	-27	-15	-5	-42	-5	-5	-14	5	-3	3	-5	12	25	-24	-3	-20	8	-6	-7	-8	-23	-11
195.43	3	-21	-169	-182	13	6	-40	-8	-13	-6	-1	15	48	12	49	-10	-2	-5	-6	5	-3	4	-2	66	-2	-35	-17	-28	-17	-5	-44	-6	-5	-15	5	-3	4	-6	12	27	-24	-3	-20	4	-4	-7	-7	-24	-13
202.61	3	-24	-176	-190	15	7	-40	-7	-12	-6	-1	15	51	13	51	-11	-2	-6	-6	5	-4	5	-1	66	-2	-35	-18	-29	-17	-5	-46	-7	-5	-15	7	-3	3	-5	13	28	-24	-2	-20	6	-3	-6	-9	-22	-12
215.68	4	-26	-186	-201	17	8	-40	-8	-11	-6	-1	17	54	13	55	-12	-2	-6	-6	6	-4	5	0	65	-1	-36	-19	-31	-18	-6	-48	-7	-3	-17	6	-3	4	-6	13	29	-22	-2	-21	6	-6	-5	-7	-26	-9
229.39	4	-29	-196	-210	18	9	-38	-7	-13	-6	-1	18	57	15	57	-12	-2	-6	-7	6	-4	5	0	65	-2	-36	-19	-32	-19	-6	-51	-4	-4	-17	7	-3	4	-6	14	31	-20	-2	-20	6	-7	-6	-9	-25	-11
243.27	6	-30	-204	-217	19	10	-38	-7	-12	-5	-1	19	61	15	61	-12	-2	-5	-6	7	-4	5	1	65	-2	-36	-19	-34	-20	-6	-53	-5	-3	-19	8	-3	4	-6	15	33	-15	-1	-20	7	-5	-5	-8	-27	-9
256.18	7	-29	-213	-226	21	11	-37	-7	-12	-5	-1	19	64	16	65	-13	0	-5	-6	7	-5	5	2	64	-2	-35	-21	-35	-21	-6	-56	-2	-4	-19	8	-3	4	-6	15	35	-16	-1	-19	13	-3	-6	-6	-27	-10
270	8	-31	-224	-236	24	13	-36	-7	-11	-5	-1	21	69	17	69	-13	-2	-4	-7	7	-5	6	2	64	-2	-36	-21	-38	-22	-7	-59	-3	-3	-21	8	-3	5	-7	16	37	-16	-1	-20	5	-4	-6	-6	-29	-10
290.25	10	-37	-236	-247	26	14	-36	-7	-11	-5	-2	23	75	17	74	-14	-2	-4	-7	8	-5	6	3	64	-2	-36	-21	-40	-23	-7	-63	-1	-4	-22	9	-3	5	-7	16	40	-10	0	-20	4	-5	-8	-6	-31	-11
303.97	10	-37	-245	-255	27	15	-35	-8	-11	-5	-2	24	79	18	76	-15	-2	-3	-7	8	-6	7	4	64	-2	-36	-23	-42	-25	-8	-65	0	-4	-23	10	-3	5	-7	19	42	-8	0	-20	15	-3	-9	-4	-33	-10
316.98	11	-39	-257	-264	29	16	-35	-7	-11	-5	-2	25	83	19	82	-15	-3	-3	-7	9	-6	6	4	63	-2	-36	-24	-44	-25	-8	-67	0	-3	-23	10	-3	6	-7	19	43	-4	0	-20	5	-3	-7	-5	-33	-11
324.22	13	-39	-265	-270	30	17	-35	-7	-10	-5	-2	26	86	19	84	-15	-2	-3	-7	9	-6	7	5	63	-2	-36	-24	-45	-26	-8	-70	2	-3	-24	11	-3	5	-7	20	45	-5	0	-19	14	-2	-7	-5	-22	-12
337.28	13	-40	-276	-280	32	17	-34	-7	-10	-6	-2	27	90	19	88	-16	-3	-3	-7	10	-6	7	5	63	-2	-36	-25	-47	-26	-8	-72	2	-2	-26	11	-3	6	-8	21	47	-5	1	-18	4	0	-9	-4	-36	-8
357.59	13	-38	-287	-289	33	19	-34	-7	-10	-5	-2	29	94	20	91	-16	-3	-3	-7	10	-7	7	6	63	-2	-36	-26	-48	-28	-8	-75	0	-3	-27	11	-3	6	-8	21	49	-3	1	-18	1	2	-11	-4	-39	-12
364.07	15	-43	-295	-296	35	20	-34	-7	-10	-5	-2	29	97	20	94	-17	-2	-3	-7	10	-7	7	7	62	-2	-36	-26	-50	-29	-8	-77	1	-2	-27	11	-3	6	-8	22	50	-12	1	-18	5	-2	-7	-5	-35	-10
371.3	15	-45	-304	-303	36	20	-34	-7	-10	-5	-2	30	100	21	96	-17	-2	-3	-7	10	-7	8	7	62	-2	-36	-27	-51	-29	-9	-78	3	-3	-28	12	-3	6	-8	23	52	-2	1	-19	7	0	-10	-5	-40	-11
384.32	16	-46	-310	-308	36	21	-33	-7	-9	-5	-2	31	102	22	98	-17	-3	-4	-7	11	-7	8	8	62	-3	-36	-27	-52	-30	-9	-80	3	-3	-28	12	-3	6	-9	23	53	0	2	-18	14	1	-10	-7	-40	-14
384.32	17	-48	-315	-312	38	22	-32	-7	-9	-5	-2	32	104	22	100	-18	-2	-3	-7	11	-7	7	8	62	-3	-36	-27	-53	-30	-9	-81	3	-2	-29	13	-3	6	-9	23	53	-2	1	-18	2	0	-10	-4	-40	-13
398.03	17	-44	-322	-318	39	22	-33	-7	-8	-5	-2	33	106	22	102	-18	-2	-3	-7	11	-7	8	8	61	-2	-36	-28	-54	-30	-9	-82	5	-3	-29	13	-3	7	-9	24	55	-21	2	-19	3	3	-8	-4	-41	-16
398.03	17	-52	-327	-322	40	22	-33	-7	-8	-5	-2	33	108	22	104	-19	-2	-3	-7	11	-7	8	8	62	-2	-36	-28	-55	-31	-9	-83	3	-2	-29	13	-3	7	-9	23	55	2	2	-17	4	0	-10	-5	-40	-15
404.62	18	-47	-330	-324	40	23	-33	-7	-9	-5	-2	33	109	22	105	-18	-2	-4	-7	11	-8	8	9	61	-2	-37	-29	-54	-31	-9	-84	6	-2	-30	13	-3	7	-9	24	56	8	2	-16	3	1	-9	-2	-40	-13
404.57	18	-47	-342	-337	41	23	-33	-6	-8	-5	0	38	114	24	108	-13	-2	-5	-8	11	-8	9	9	60	-3	-37	-28	-55	-31	-8	-85	3	1	-30	14	-3	7	-1	24	56	4	-16	-7	2	2	-9	-3	-41	-12
404.57	19	-45	-342	-337	41	24	-34	-6	-7	-4	0	38	114	24	108	-12	-2	-5	-8	11	-8	8	9	60	-3	-37	-28	-55	-31	-8	-85	4	1	-30	14	-3	7	-2	24	57	7	-16	-11	4	3	-8	-3	-40	-11
404.57	18	-46	-342	-337	41	23	-34	-6	-6	-5	0	38	114	24	108	-13	-2	-5	-8	11	-8	8	9	60	-3	-37	-28	-55	-31	-9	-85	3	1	-30	14	-3	7	-2	25	56	4	-17	-11	5	3	-9	-2	-41	-11
404.57	19	-46	-342	-337	41	23	-34	-6	-5	-5	0	37	114	24	108	-14	-2	-5	-7	11	-8	8	9	60	-2	-37	-28	-55	-31	-8	-85	3	1	-30	13	-3	7	-2	25	57	8	-17	-11	5	3	-8	-2	-40	-10
397.98	19	-48	-342	-335	41	23	-34	-6	-5	-5	0	37	114	24	108	-13	-2	-5	-7	11	-8	8	9	60	-2	-37	-28	-55	-31	-8	-85	3	0	-30	14	-2	7	-2	25	56	5	-17	-12	5	2	-8	-2	-39	-10
350.95	18	-45	-338	-332	40	23	-35	-6	-6	-5	-1	36	111	23	106	-13	-2	-5	-8	11	-8	8	8	60	-2	-37	-28	-54	-30	-8	-83	5	0	-29	13	-2	7	-3	23	55	4	-17	-12	4	2	-9	-3	-40	-13
316.93	16	-45	-325	-321	36	21	-36	-6	-6	-5	-1	34	106	22	100	-13	-2	-5	-8	10	-7	7	7	60	-3	-38	-26	-51	-29	-8	-78	2	-1	-27	11	-2	6	-2	22	51	0	-19	-13	6	1	-7	-5	-40	-11
283.72	15	-42	-306	-305	33	19	-36	-6	-5	-5	0	31	97	21	92	-11	-2	-5	-7	9	-7	7	6	61	-3	-38	-25	-47	-26	-8	-72	1	-2	-25	11	-2	6	-2	21	46	-4	-20	-15	7	1	-9	-5	-38	-10
249.59	12	-31	-282	-285	29	16	-38	-6	-4	-5	0	28	87	19	83	-10	-2	-4	-7	9	-6	6	3	62	-3	-38	-22	-42	-24	-7	-65	1	-2	-23	9	-3	5	-2	19	40	-11	-21	-14	17	2	-8	-5	-34	-11
215.62	12	-30	-244	-254	-35	20	-33	-7	-4	-6	0	24	75	17	72	-9	-2	-4	-7	7	-6	5	2	62	-2	-38	-20	-37	-21	-6	-58	-2	-4	-20	8	-2	4	-1	16	35	-15	-22	-16	6	-4	-7	-6	-30	-10
154.82	6	-26	-208	-221	60	23	-28	-7	-4	-6	1	20	61	15	59	-7	-2	-5	-7	6	-5	5	0	63	-2	-38	-18	-31	-18	-5	-49	-4	-4	-17	6	-3	4	-1	13	28	-21	-23	-17	9	-3	-5	-6	-24	-8
121.5	3	-21	-176	-190	50	18	-32	-7	-5	-6	1	16	51	12	48	-6	-2	-4	-6	4	-4	4	-3	64	-2	-37	-16	-26	-15	-5	-41	-8	-4	-14	5	-3	3	0	12	23	-31	-24	-18	6	-5	-6	-7	-23	-8
73.71	5	-13	-119	-147	59	1	-33	-7	-4	-1	2	14	40	9	38	-4	3	-5	-6	2	-4	3	-5	65	-2	-38	-13	-20	-13	-4	-32	-10	-4	-11	3	-3	2	0	10	17	-29	-26	-17	8	-5	-4	-8	-18	-7
46.98	2	-13	-106	-121	39	-3	-35	-8	-5	-2	3	13	34	8	32	-3	4	-5	-6	2	-4	2	-5	65	-3	-38	-12	-16	-11	-4	-28	-9	-5	-9	2	-3	2	0	9	14	-37	-27	-18	11	-6	-3	-7	-17	-6
2.81	-1	-10	-80	-85	33	-6	-37	-8	-4	-3	3	10	27	5	24	-2	3	-5	-6	0	-3	2	-6	65	-3	-37	-10	-13	-10	-3	-22	-12	-6	-8	1	-3	1	0	7	9	-44	-27	-20	10	-7	-2	-8	-15	-5
-0.11	-3	-5	-59	-59	29	-9	-38	-8	-4	-3	3	8	21	4	18	-2	3	-5	-6	0	-3	2	-7	65	-3	-37	-10	-11	-9	-3	-17	-11	-5	-6	0	-4	1	1	6	7	-48	-28	-19	10	-7	-2	-7	-12	-5
6.48	-5	-5	-43	-45	26	-10	-40	-9	-5	-4	3	6	16	3	14	-1	2	-5	-6	-1	-3	0	-9	65	-3	-37	-9	-9	-8	-3	-15	-13	-6	-5	0	-4	0	0	6	5	-40	-28	-17	8	-8	-2	-8	-11	-7
47.03	-5	-4	-44	-46	26	-11	-40	-9	-5	-4	3	6	17	3	15	-2	2	-5	-6	-1	-2	0	-8	65	-3	-37	-9	-9	-8	-3	-15	-12	-6	-6	1	-4	1	0	7	5	-33	-28	-19	10	-8	-2	-9	-12	-5
46.98	-5	-7	-46	-46	25	-11	-40	-9	-4	-4	2	6	17	3	15	-2	2	-6	-6	-1	-3	0	-8	65	-3	-37	-9	-10	-8	-3	-15	-13	-6	-6	0	-4	1	0	6	5	-30	-28	-18	9	-9	-3	-9	-11	-6
46.98	-5	-6	-47	-47	25	-11	-40	-9	-3	-4	3	6	17	3	15	-2	2	-5	-5	-1	-3	0	-8	65	-3	-37	-9	-10	-8	-4	-16	-12	-6	-6	-1	-4	1	0	6	5	-31	-28	-17	10	-7	-2	-7	-10	-4
47.03	-3	-3	-48	-47	25	-11	-40	-9	-3	-4	2	6	17	3	15	-2	2	-6	-6	-1	-3	0	-8	65	-3	-37	-9	-10	-8	-3	-16	-12	-6	-6	-1	-4	1	0	6	5	-28	-28	-19	11	-6	0	-8	-11	-4
47.03	-6	-5	-49	-48	24	-11	-40	-9	-3	-5	2	6	17	3	15	-2	2	-6	-6	-1	-3	0	-8	65	-3	-37	-9	-10	-8	-4	-16	-12	-6	-6	-1	-4	1	0	6	5	-33	-28	-19	11	-7	-3	-8	-11	-4
47.03	-4	-7	-49	-48	25	-11	-40	-8	-2	-5	3	6	17	3	16	-2	2	-6	-5	-1	-3	0	-8	65	-3	-37	-9	-10	-9	-3	-16	-13	-6	-6	0	-4	1	-1	6	6	-24	-28	-19	18	-9	-1	-8	-11	-5
53.57	-4	-6	-51	-50	24	-11	-40	-9	-2	-5	2	6	18	3	16	-2	2	-6	-6	-1	-3	0	-8	65	-3	-37	-9	-10	-9	-3	-16	-11	-7	-6	0	-4	1	0	6	6	-44	-28	-21	9	-8	-3	-9	-12	-6
53.62	-5	-3	-52	-50	24	-11	-41	-9	0	-5	2	6	18	3	16	-3	2	-6	-6	-1	-3	0	-8	65	-3	-37	-10	-10	-9	-3	-17	-10	-7	-6	0	-4	1	0	7	6	-39	-28	-22	10	-6	-1	-8	-10	-4
53.57	-5	-7	-54	-51	24	-11	-41	-9	0	-5	1	6	18	3	16	-2	2	-6	-6	-1	-3	0	-8	65	-3	-37	-9	-11	-9	-3	-17	-12	-7	-6	1	-4	1	-1	7	6	-41	-28	-21	9	-9	-3	-9	-11	-6
60.8	-5	-5	-56	-53	24	-11	-41	-9	0	-5	2	6	19	3	17	-3	1	-6	-6	-1	-3	0	-8	65	-3	-37	-10	-11	-9	-3	-17	-10	-6	-7	2	-4	1	-1	8	6	-45	-28	-21	10	-6	-3	-8	-11	-6
60.75	-5	-4	-58	-54	24	-11	-41	-9	0	-5	1	6	19	3	17	-3	1	-6	-6	-1	-3	0	-8	65	-3	-37	-10	-11	-9	-3	-18	-11	-6	-7	1	-4	1	-1	8	7	-37	-28	-21	11	-6	-1	-8	-12	-5
67.23	-5	-7	-60	-56	24	-11	-41	-9	1	-5	2	6	20	4	18	-3	2	-7	-6	-1	-3	0	-8	65	-3	-37	-10	-11	-9	-3	-18	-11	-7	-7	1	-4	1	-1	7	7	-51	-28	-22	7	-7	-3	-8	-13	-5
67.23	-5	-14	-62	-58	24	-12	-41	-9	-1	-5	1	7	21	4	19	-3	2	-6	-6	-1	-3	0	-8	64	-3	-37	-10	-12	-10	-3	-19	-12	-6	-7	1	-4	1	-1	7	7	-41	-28	-21	7	-8	-3	-9	-13	-6
73.82	-5	-7	-65	-61	24	-11	-41	-9	0	-5	1	7	21	4	19	-4	1	-7	-6	-1	-3	0	-8	64	-3	-37	-10	-12	-10	-3	-19	-11	-7	-7	0	-4	2	-1	8	8	-43	-28	-21	9	-6	-5	-1	-13	-7
73.82	-5	-15	-68	-66	24	-11	-41	-9	0	-5	1	7	22	4	20	-3	1	-6	-6	-1	-3	0	-8	64	-3	-37	-10	-13	-10	-3	-21	-10	-7	-8	1	-4	1	-2	8	8	-47	-28	-21	8	-10	-3	-8	-13	-7
81.11	-4	-9	-71	-69	25	-11	-41	-9	0	-5	1	7	23	4	21	-4	1	-6	-6	0	-3	0	-8	64	-3	-37	-10	-13	-10	-3	-21	-8	-6	-8	1	-4	1	-1	7	9	-41	-28	-20	9	-7	-3	-8	-13	-5
81.11	-4	-14	-74	-73	25	-11	-41	-10	4	-5	1	8	24	5	22	-4	1	-6	-6	0	-3	0	-7	64	-3	-37	-10	-14	-10	-3	-22	-10	-6	-8	0	-4	1	-2	7	9	-41	-28	-21	11	-9	-3	-11	-14	-4
94.07	-4	-13	-80	-80	25	-10	-41	-9	0	-6	1	8	25	5	23	-4	1	-7	-6	0	-4	0	-7	64	-3	-37	-11	-15	-11	-4	-23	-11	-6	-9	0	-4	2	-2	7	10	-40	-28	-22	8	-8	-5	-8	-16	-7
101.36	-3	-12	-86	-88	26	-9	-40	-9	-2	-5	1	8	27	6	25	-5	1	-6	-6	0	-4	1	-7	64	-3	-37	-12	-15	-11	-3	-25	-9	-6	-9	1	-4	2	-2	8	11	-36	-28	-22	9	-8	-4	-9	-16	-8
114.26	-3	-12	-96	-101	27	-8	-40	-9	0	-5	0	10	30	6	29	-5	1	-7	-6	1	-4	2	-7	63	-3	-37	-12	-16	-12	-4	-28	-10	-6	-10	1	-4	2	-2	9	14	-34	-27	-21	8	-8	-3	-9	-16	-8
128.14	-2	-14	-105	-114	28	-7	-40	-9	2	-5	0	10	33	7	31	-5	1	-6	-6	1	-4	2	-6	63	-3	-37	-13	-19	-13	-4	-30	-9	-6	-11	2	-4	2	-2	9	16	-36	-27	-21	12	-7	-6	-9	-19	-7
141.86	-1	-17	-116	-129	29	-6	-40	-9	3	-5	0	12	35	8	34	-5	1	-7	-7	1	-4	2	-5	63	-3	-37	-13	-21	-14	-4	-32	-9	-5	-12	1	-4	2	-3	10	17	-41	-27	-21	8	-7	-5	-7	-19	-2
154.87	1	-18	-131	-148	31	-4	-38	-8	0	-5	0	13	40	9	39	-6	1	-6	-7	3	-4	3	-5	63	-3	-37	-14	-23	-15	-5	-37	-9	-4	-13	3	-4	2	-3	11	20	-32	-27	-19	7	-6	-6	-7	-22	-9
168.64	3	-45	-141	-160	32	-3	-38	-8	1	-5	0	14	43	10	42	-7	1	-6	-7	3	-5	3	-4	62	-3	-37	-16	-24	-16	-5	-39	-7	-5	-14	3	-4	3	-3	11	22	-31	-26	-21	15	-18	-3	-7	-22	-9
182.36	4	-18	-153	-175	34	-2	-37	-8	2	-5	0	16	47	11	47	-7	1	-6	-7	4	-5	3	-3	62	-3	-37	-17	-27	-17	-5	-42	-8	-4	-15	4	-3	3	-3	12	24	-30	-26	-21	4	-5	-5	-7	-24	-9
188.95	4	-20	-162	-185	35	-1	-37	-8	3	-5	-1	16	50	11	49	-8	1	-6	-7	4	-5	4	-3	61	-2	-37	-17	-28	-17	-5	-45	-5	-4	-16	6	-3	3	-4	13	26	-26	-26	-20	5	-3	-7	-8	-24	-8
202.61	6	-19	-174	-199	37	0	-37	-8	1	-5	-1	18	54	12	54	-8	1	-6	-7	4	-6	4	-2	61	-3	-37	-18	-30	-18	-6	-48	-6	-4	-17	5	-4	3	-4	14	28	-26	-25	-21	6	-3	-6	-9	-25	-9
215.68	6	-25	-185	-210	38	1	-37	-8	1	-5	-1	19	58	13	58	-9	1	-7	-7	5	-5	4	-2	61	-3	-37	-19	-31	-19	-7	-50	-3	-4	-18	6	-4	4	-4	14	30	-23	-25	-21	7	-4	-5	-6	-25	-8
222.91	8	-27	-194	-217	39	2	-36	-8	2	-5	-1	19	60	14	60	-10	1	-6	-7	5	-6	4	-1	61	-2	-37	-19	-33	-19	-6	-52	-5	-3	-19	6	-3	4	-4	14	31	-24	-25	-20	17	-6	-6	-5	-27	-9
235.98	8	-24	-201	-225	40	3	-36	-8	2	-5	-1	21	63	14	63	-10	1	-6	-7	6	-6	4	-1	61	-2	-38	-20	-34	-20	-6	-54	-3	-4	-19	7	-3	4	-5	15	33	-22	-24	-20	6	-2	-7	-6	-27	-10
249.7	9	-21	-210	-234	41	4	-35	-8	1	-5	-2	21	66	15	66	-10	1	-6	-7	6	-6	5	0	61	-3	-37	-21	-36	-21	-7	-56	-3	-3	-20	7	-3	4	-5	15	34	-17	-24	-20	5	0	-7	-5	-29	-9
263.47	11	-29	-218	-241	43	5	-35	-8	2	-4	-2	23	71	16	69	-11	1	-6	-7	7	-6	5	1	60	-2	-37	-21	-37	-22	-6	-58	-2	-3	-21	9	-3	4	-5	18	36	-18	-24	-20	7	-3	-7	-8	-30	-11
276.48	12	-111	-230	-254	45	6	-34	-7	3	-4	-2	24	75	17	74	-11	1	-6	-7	7	-6	5	2	60	-3	-37	-22	-40	-24	-7	-62	1	-2	-22	8	-3	5	-5	18	39	-16	-24	-20	4	-11	-3	-5	-33	-11
290.25	13	-33	-241	-263	47	7	-34	-8	3	-4	-2	26	80	17	78	-12	1	-6	-8	8	-7	6	2	60	-3	-37	-23	-41	-24	-7	-64	0	-3	-23	9	-3	5	-5	19	41	-12	-23	-20	4	0	-9	-6	-34	-11
310.5	15	-32	-253	-273	49	9	-34	-7	4	-4	-2	27	85	18	83	-12	1	-6	-7	8	-7	6	3	59	-3	-37	-24	-44	-26	-7	-67	-2	-3	-24	9	-3	5	-6	19	43	-8	-23	-21	6	-1	-10	-5	-32	-11
324.22	15	-38	-264	-282	51	10	-33	-7	4	-4	-2	28	89	19	87	-13	1	-6	-8	9	-7	6	4	59	-3	-37	-25	-46	-27	-8	-71	3	-4	-25	9	-3	5	-6	20	45	-6	-23	-21	5	-1	-9	-6	-34	-12
343.76	17	-37	-278	-294	54	11	-32	-7	3	-4	-2	30	95	20	92	-14	1	-6	-8	9	-7	7	5	59	-3	-38	-26	-49	-28	-8	-75	1	-2	-26	11	-3	6	-7	21	48	-3	-22	-21	5	0	-9	-4	-37	-12
371.3	19	-41	-296	-307	57	13	-32	-7	5	-4	-2	33	102	21	99	-14	1	-6	-8	10	-8	7	6	59	-3	-37	-27	-51	-29	-8	-79	4	-1	-28	11	-3	6	-7	22	51	-2	-22	-21	5	0	-6	-4	-41	-12
391.55	21	-41	-309	-317	59	15	-31	-7	6	-4	-2	34	107	22	103	-15	1	-6	-8	11	-8	7	7	58	-3	-37	-28	-53	-30	-9	-82	3	-1	-29	12	-3	6	-7	23	54	2	-22	-20	4	2	-10	-4	-41	-11
404.62	23	-41	-321	-326	60	15	-31	-7	7	-3	-2	35	112	22	108	-15	1	-6	-8	11	-8	8	8	58	-3	-37	-29	-55	-31	-9	-85	5	-1	-30	12	-3	7	-8	24	57	5	-21	-20	4	3	-9	-3	-44	-12
418.34	23	-47	-331	-335	63	17	-31	-7	6	-3	-2	36	116	23	111	-16	1	-6	-8	12	-9	8	8	58	-3	-37	-30	-57	-32	-9	-88	5	-1	-31	13	-3	7	-8	24	58	8	-21	-20	5	1	-9	-5	-43	-13
432.05	24	-49	-338	-342	64	18	-30	-7	7	-3	-2	38	119	24	114	-16	1	-6	-8	12	-9	8	9	58	-3	-37	-30	-58	-33	-9	-90	8	-1	-32	13	-3	7	-8	24	60	10	-20	-20	9	3	-10	-3	-44	-13
438.53	25	-51	-347	-349	65	19	-30	-7	6	-3	-2	38	122	24	116	-17	1	-6	-8	12	-9	9	10	58	-3	-37	-30	-59	-34	-9	-91	8	-1	-33	13	-3	7	-8	25	61	16	-20	-20	14	3	-9	-1	-45	-14
452.41	27	-49	-355	-356	66	19	-30	-7	6	-3	-2	39	126	25	121	-17	1	-7	-8	13	-9	9	10	57	-3	-38	-31	-61	-34	-9	-94	9	-1	-33	13	-3	7	-8	25	62	15	-20	-19	1	3	-11	-2	-46	-13
458.84	26	-52	-363	-362	68	20	-30	-7	6	-3	-2	40	129	25	123	-18	1	-7	-8	13	-9	9	11	57	-3	-38	-32	-62	-35	-10	-95	11	0	-34	14	-3	7	-8	25	64	13	-20	-19	4	3	-10	-2	-46	-13
472.66	27	-52	-369	-368	69	21	-29	-7	6	-3	-2	41	131	25	125	-18	1	-7	-8	13	-9	9	12	57	-3	-38	-32	-64	-36	-9	-97	8	0	-34	14	-3	7	-9	26	65	14	-20	-19	3	4	-10	-4	-47	-12
479.14	28	-54	-378	-374	70	22	-30	-7	8	-3	-2	42	134	26	128	-18	1	-7	-8	13	-10	9	12	57	-3	-38	-32	-65	-36	-9	-99	9	1	-35	14	-3	7	-9	26	66	20	-19	-19	4	2	-10	-3	-47	-14
492.91	28	-56	-389	-382	71	23	-29	-7	6	-3	-2	43	138	26	132	-19	1	-7	-8	13	-10	9	13	56	-3	-38	-33	-66	-37	-10	-102	9	1	-36	16	-2	8	-9	29	69	17	-19	-19	5	4	-10	-1	-49	-13
499.39	30	-59	-396	-388	73	24	-29	-7	6	-3	-2	44	141	28	134	-19	1	-7	-8	15	-10	9	13	56	-3	-38	-34	-68	-38	-10	-104	10	0	-37	16	-3	8	-9	27	70	21	-17	-19	3	2	-13	-3	-52	-13
513.16	30	-60	-404	-395	73	26	-29	-7	6	-3	-1	45	145	28	137	-19	1	-7	-9	15	-10	10	14	56	-3	-38	-34	-69	-38	-11	-105	10	1	-37	15	-3	8	-9	27	72	24	-17	-19	4	3	-11	-2	-51	-15
499.39	36	-53	-414	-403	69	26	180	-6	6	-2	-4	46	151	31	141	-18	2	-7	-8	15	-10	11	14	56	-2	-38	-31	-65	-35	-7	-102	11	5	-36	19	-2	9	-7	30	73	25	-43	-5	-3	4	-11	-5	-48	-16
499.39	36	-52	-415	-403	69	26	178	-6	6	-2	-4	46	150	31	141	-18	2	-7	-8	15	-10	10	15	56	-2	-38	-31	-65	-35	-7	-102	11	3	-36	18	-2	9	-8	31	73	23	-43	-9	-2	5	-13	-1	-50	-14
432.05	36	-52	-410	-399	68	26	177	-6	7	-2	-4	45	147	30	138	-17	2	-7	-8	15	-10	10	14	56	-2	-38	-30	-63	-34	-7	-98	9	5	-35	17	-3	9	-7	29	69	23	-44	-11	2	4	-11	-3	-47	-12
337.23	31	-44	-370	-366	60	20	173	-7	8	-3	-3	39	126	26	118	-15	2	-6	-8	12	-8	8	9	57	-2	-39	-26	-53	-29	-5	-82	6	1	-29	14	-3	7	-6	25	56	8	-46	-13	2	3	-13	-4	-45	-11
243.22	23	-32	-307	-311	48	12	172	-7	8	-4	-3	31	99	22	93	-12	2	-6	-7	9	-7	7	5	59	-2	-39	-20	-40	-23	-4	-63	0	0	-22	10	-4	6	-5	20	41	-11	-49	-15	4	1	-7	-7	-36	-10
140.62	15	-21	-233	-247	34	3	164	-7	8	-4	-2	22	71	17	66	-8	2	-6	-7	6	-5	5	-1	60	-2	-39	-16	-29	-17	-2	-47	-3	-1	-16	6	-4	4	-4	16	30	-21	-51	-15	6	-4	-7	-7	-26	-10
53.51	9	-14	-174	-186	26	-3	162	-8	8	-5	-1	16	51	13	48	-6	2	-6	-7	3	-4	3	-4	62	-2	-39	-12	-21	-13	-1	-33	-6	-1	-12	4	-4	3	-3	12	20	-29	-53	-17	8	-5	-6	-8	-20	-9
6.43	5	-12	-133	-137	21	-6	160	-8	8	-5	-1	12	39	10	36	-5	2	-6	-6	2	-4	3	-6	62	-2	-38	-10	-15	-10	-1	-26	-8	-3	-9	4	-4	3	-3	11	15	-33	-54	-19	14	-7	-1	-11	-17	-9
-0.16	3	-7	-106	-103	17	-10	159	-9	9	-5	-1	10	33	9	29	-3	2	-7	-6	1	-4	2	-7	62	-3	-38	-8	-13	-9	0	-22	-8	-4	-8	2	-5	2	-3	10	11	-39	-55	-20	9	-8	-5	-10	-15	-5
6.48	-2	-3	-66	-59	13	-13	159	-9	9	-6	-1	6	22	5	19	-3	1	-8	-6	-1	-3	0	-9	63	-4	-38	-8	-9	-7	0	-15	-11	-4	-6	2	-5	2	-3	8	7	-36	-56	-20	5	-8	-4	-11	-12	-8
73.76	0	-6	-66	-59	13	-13	162	-9	8	-6	-1	6	23	6	20	-3	1	-7	-6	-1	-3	0	-9	62	-3	-38	-7	-9	-7	-1	-15	-11	-4	-6	1	-5	2	-3	8	7	-37	-56	-22	7	-9	-2	-9	-13	-5
73.76	-1	-3	-70	-62	13	-12	161	-9	9	-6	-1	7	25	6	21	-3	1	-7	-6	0	-3	0	-8	63	-3	-38	-8	-10	-7	-1	-16	-10	-4	-7	2	-5	2	-3	9	8	-35	-56	-20	7	-8	-6	-10	-12	-8
81.05	-1	-4	-76	-68	14	-12	159	-9	9	-6	-1	7	26	7	22	-3	1	-7	-6	-1	-3	0	-8	62	-3	-38	-8	-11	-8	-1	-18	-8	-5	-7	2	-5	2	-3	9	9	-32	-56	-18	7	-8	-6	-9	-15	-6
87.43	1	-5	-81	-73	14	-11	158	-9	10	-5	-1	8	27	7	24	-3	1	-7	-6	0	-4	1	-8	62	-3	-38	-8	-12	-8	0	-19	-8	-4	-8	2	-5	2	-3	9	10	-43	-56	-20	16	-8	-4	-10	-12	-7
94.01	0	-4	-88	-82	17	-11	158	-9	10	-6	-1	8	29	8	26	-4	1	-7	-6	0	-4	2	-8	62	-3	-38	-9	-13	-9	-1	-22	-7	-5	-9	2	-5	2	-4	10	11	-39	-56	-20	7	-6	-6	-8	-14	-9
101.3	1	-107	-96	-92	17	-10	160	-9	12	-6	-1	9	31	8	28	-4	1	-7	-6	0	-4	2	-7	62	-3	-38	-9	-14	-9	-1	-23	-9	-4	-9	3	-5	2	-3	10	13	-37	-56	-20	7	-8	-4	-9	-16	-6
107.73	3	-6	-104	-102	18	-9	160	-9	11	-5	-2	10	33	9	31	-4	1	-7	-7	1	-4	2	-7	62	-3	-38	-10	-15	-10	-1	-25	-8	-4	-10	4	-5	3	-4	11	14	-36	-56	-21	5	-7	-4	-9	-14	-9
114.21	2	-12	-112	-113	19	-9	159	-9	12	-6	-2	11	35	9	33	-5	1	-8	-7	1	-4	2	-6	61	-3	-38	-11	-16	-11	-2	-27	-7	-5	-11	3	-5	3	-4	11	15	-38	-55	-20	8	-9	-5	-10	-16	-8
128.09	4	-13	-121	-125	20	-7	159	-9	12	-6	-2	12	39	10	36	-5	1	-8	-7	1	-4	2	-6	61	-3	-38	-11	-19	-12	-2	-30	-9	-3	-11	4	-5	3	-4	12	17	-27	-55	-21	19	-8	1	-8	-18	-7
141.8	5	-12	-134	-145	22	-6	160	-9	12	-6	-3	13	42	11	40	-6	1	-8	-7	2	-5	2	-6	61	-3	-38	-13	-21	-13	-2	-32	-7	-2	-13	4	-5	3	-5	13	20	-33	-55	-20	7	-8	-4	-9	-19	-7
154.82	7	-8	-146	-160	24	-4	164	-9	20	-5	-3	14	46	12	44	-6	1	-7	-7	3	-5	3	-5	61	-3	-38	-13	-23	-14	-2	-36	-4	-4	-14	5	-5	3	-5	13	22	-27	-55	-20	5	-4	-6	-9	-19	-7
175.12	7	-12	-160	-177	25	-2	166	-8	13	-5	-3	16	50	13	49	-7	1	-7	-7	4	-5	3	-4	60	-3	-38	-14	-25	-15	-3	-40	-4	-2	-15	4	-5	4	-5	12	25	-30	-54	-21	16	-4	-4	-7	-20	-8
202.55	10	-14	-181	-202	27	0	169	-8	14	-5	-4	18	57	14	57	-8	1	-7	-7	5	-5	4	-3	60	-3	-38	-16	-29	-17	-3	-46	-3	-2	-17	5	-5	4	-5	13	29	-24	-54	-21	6	-3	-7	-8	-21	-10
229.39	11	-20	-204	-226	30	2	172	-8	14	-5	-4	21	65	16	64	-9	1	-8	-8	5	-6	4	-1	59	-3	-38	-18	-33	-19	-4	-52	-1	-2	-19	6	-5	5	-6	15	34	-20	-53	-20	4	-5	-7	-8	-26	-12
256.12	15	-21	-226	-248	37	5	168	-7	16	-5	-4	23	75	19	72	-10	2	-7	-8	6	-6	5	1	59	-3	-38	-19	-36	-20	-4	-57	1	-1	-21	7	-4	5	-6	16	38	-17	-52	-19	16	-4	-8	-6	-28	-10
283.77	17	-29	-244	-270	40	7	164	-8	16	-5	-4	26	83	20	82	-11	1	-8	-8	7	-7	5	2	58	-2	-38	-21	-41	-23	-4	-63	0	0	-23	7	-4	5	-6	18	42	-13	-51	-19	6	-2	-5	-11	-25	-9
310.5	20	-31	-271	-289	43	10	160	-7	15	-4	-4	28	91	22	89	-12	1	-7	-8	8	-7	6	3	58	-3	-38	-22	-43	-24	-5	-67	2	0	-25	9	-4	6	-7	19	45	-11	-50	-18	5	-2	-9	-5	-33	-10
330.8	21	-33	-286	-302	47	11	160	-7	16	-4	-4	30	97	22	94	-13	1	-8	-8	9	-7	6	4	57	-3	-38	-23	-46	-26	-6	-71	4	0	-26	9	-4	6	-7	20	48	-4	-50	-18	15	0	-9	-7	-34	-13
351	22	-34	-301	-314	50	13	159	-7	17	-4	-4	32	104	23	99	-13	1	-8	-8	9	-8	7	5	57	-3	-38	-24	-48	-27	-6	-75	5	0	-27	10	-4	7	-7	21	52	-5	-49	-16	0	-2	-9	-6	-36	-12
371.3	24	-34	-312	-323	52	14	158	-7	18	-4	-4	33	108	24	104	-14	1	-8	-8	10	-8	7	6	57	-3	-38	-25	-50	-28	-6	-78	8	0	-29	11	-4	7	-8	22	54	3	-49	-14	14	1	-10	-3	-39	-8
391.5	25	-39	-328	-335	55	16	155	-7	18	-4	-5	35	113	24	109	-15	1	-8	-8	10	-9	7	6	56	-3	-38	-26	-53	-29	-6	-82	7	1	-30	12	-4	7	-8	23	57	1	-48	-16	-1	0	-9	-5	-38	-12
404.57	27	-45	-341	-347	58	18	155	-7	18	-4	-5	37	119	25	114	-15	1	-8	-9	11	-9	8	7	56	-3	-39	-27	-56	-31	-7	-86	7	1	-31	12	-4	8	-8	24	59	11	-47	-16	4	-1	-8	-4	-39	-11
438.53	29	-45	-361	-363	61	20	156	-7	18	-4	-5	39	127	26	123	-17	1	-9	-8	11	-10	9	9	55	-3	-38	-29	-59	-33	-7	-91	10	2	-33	14	-4	8	-9	25	63	10	-46	-15	3	2	-11	-4	-44	-11
465.37	31	-49	-380	-379	64	22	157	-7	16	-4	-5	41	136	29	130	-17	1	-8	-9	12	-10	9	10	55	-3	-38	-31	-62	-35	-7	-96	9	2	-35	15	-4	8	-9	27	67	19	-45	-13	2	3	-10	-1	-46	-12
519.7	35	-59	-417	-406	70	27	156	-7	17	-3	-5	45	151	31	143	-20	0	-9	-9	15	-11	10	14	54	-3	-38	-33	-69	-37	-8	-106	13	4	-38	16	-4	9	-10	28	74	24	-42	-14	0	3	-12	-2	-49	-14
539.95	38	-59	-432	-418	73	29	152	-7	17	-3	-5	48	158	32	149	-20	1	-9	-9	15	-11	10	15	53	-3	-39	-34	-71	-39	-9	-111	13	4	-40	17	-4	9	-10	29	78	27	-39	-13	1	6	-10	-2	-52	-12
553.66	37	-58	-441	-426	75	30	149	-7	18	-3	-5	49	162	32	152	-20	0	-9	-9	15	-12	10	15	53	-3	-39	-34	-73	-39	-9	-113	14	5	-40	17	-4	9	-11	30	80	35	-39	-13	3	8	-13	-1	-52	-15
573.91	39	-62	-456	-439	77	33	148	-7	18	-3	-5	50	170	34	158	-21	0	-9	-9	16	-12	10	17	53	-3	-39	-35	-76	-41	-9	-117	14	4	-42	18	-4	9	-11	31	83	43	-38	-13	3	7	-11	-2	-56	-13
586.98	41	-62	-468	-449	80	34	149	-7	19	-2	-5	52	176	34	164	-21	0	-6	-9	17	-13	11	19	53	-3	-39	-36	-78	-42	-9	-120	15	5	-43	19	-4	10	-11	33	85	33	-37	-14	6	7	-11	1	-56	-14
594.22	42	-65	-475	-454	81	36	149	-7	19	-2	-5	53	179	35	167	-21	1	-9	-9	16	-13	10	19	52	-3	-39	-37	-78	-42	-9	-121	17	5	-43	20	-4	10	-11	33	86	37	-37	-16	12	6	-13	-3	-58	-15
594.22	43	-65	-479	-457	82	37	148	-7	19	-2	-6	52	181	35	169	-21	0	-9	-9	17	-13	11	20	52	-4	-39	-37	-79	-43	-9	-122	16	4	-43	19	-4	10	-12	32	87	39	-37	-15	3	7	-14	1	-57	-14
607.23	44	-65	-484	-462	84	38	149	-7	19	-2	-6	53	184	35	171	-21	0	-9	-9	17	-13	11	20	52	-3	-39	-37	-80	-43	-10	-123	17	5	-44	19	-4	10	-12	32	88	36	-37	-15	1	7	-13	1	-58	-12
614.47	43	-63	-491	-467	84	38	149	-7	18	-2	-6	54	186	35	174	-22	0	-9	-9	17	-13	11	21	52	-3	-39	-37	-81	-44	-9	-125	19	3	-44	19	-4	10	-12	32	88	36	-36	-17	3	9	-11	2	-58	-13
600.64	74	-41	-488	-476	84	42	228	-8	19	-3	-5	54	193	36	177	-22	-1	-8	-8	18	-12	13	22	53	-2	-38	-35	-79	-41	-7	-124	18	8	-43	22	-3	12	17	34	89	45	-44	-5	0	8	48	14	-42	-14
573.86	73	-42	-487	-476	84	41	227	-8	19	-3	-5	54	192	36	177	-22	-1	-8	-8	18	-12	13	21	53	-3	-39	-35	-78	-41	-6	-123	18	7	-43	21	-2	13	17	34	89	46	-45	-10	1	7	49	15	-43	-14
505.76	72	-42	-478	-467	81	39	226	-8	21	-3	-5	52	186	34	171	-21	-1	-8	-8	17	-12	12	21	53	-2	-39	-34	-75	-40	-6	-118	18	6	-41	20	-3	12	17	33	84	42	-46	-11	2	5	47	14	-44	-13
465.32	69	-38	-456	-447	76	36	223	-8	22	-4	-5	48	174	32	161	-20	0	-8	-8	16	-11	11	19	54	-2	-39	-32	-70	-37	-6	-111	16	5	-38	18	-3	11	17	30	78	35	-46	-13	6	4	48	15	-38	-15
397.93	64	-27	-419	-415	68	31	222	-8	21	-4	-5	43	155	30	143	-18	0	-8	-8	15	-10	10	14	55	-2	-39	-28	-61	-33	-5	-96	13	6	-33	16	-3	10	18	27	67	24	-48	-14	9	5	48	15	-34	-11
324.16	58	-19	-370	-376	58	24	219	-8	20	-5	-4	36	131	25	123	-16	-1	-7	-8	12	-9	9	9	57	-2	-39	-24	-52	-28	-3	-82	7	3	-28	15	-3	9	19	24	56	8	-50	-16	2	3	47	11	-27	-11
235.87	53	-9	-312	-328	46	16	215	-8	19	-6	-4	29	106	21	99	-13	-1	-7	-7	9	-7	8	5	58	-1	-39	-19	-41	-22	-2	-65	1	2	-22	12	-3	8	20	20	43	-2	-53	-18	4	0	49	10	-21	-11
141.7	47	-2	-246	-270	35	8	212	-9	19	-7	-3	21	81	17	74	-10	-1	-7	-7	7	-5	6	0	59	-2	-39	-14	-30	-17	-1	-49	-2	0	-17	9	-3	6	21	15	31	-14	-55	-20	7	-4	49	7	-15	-11
73.66	41	9	-184	-209	25	1	209	-10	19	-7	-2	15	59	13	55	-8	-1	-7	-7	4	-4	5	-3	61	-1	-39	-11	-22	-13	-1	-37	-4	0	-13	6	-4	6	22	12	22	-23	-57	-20	6	-4	53	8	-9	-9
12.85	35	15	-135	-151	19	-4	207	-10	19	-7	-2	11	44	10	40	-6	-1	-7	-6	2	-4	3	-6	61	-2	-39	-8	-15	-9	0	-26	-7	-2	-9	3	-4	5	22	9	16	-30	-59	-21	6	-7	53	5	-3	-9
-0.22	33	19	-106	-113	15	-7	205	-10	19	-8	-2	9	37	8	33	-5	-2	-8	-6	1	-3	3	-7	62	-2	-38	-7	-12	-8	1	-22	-6	-2	-8	3	-4	5	22	8	11	-34	-59	-22	6	-6	51	5	-4	-8
-0.16	32	19	-74	-76	11	-10	204	-10	19	-7	-1	6	30	6	25	-4	-2	-8	-6	0	-3	2	-8	62	-2	-38	-6	-9	-7	1	-16	-9	0	-6	2	-5	4	21	7	8	-26	-60	-19	8	-10	53	4	-2	-6
-0.16	30	24	-67	-71	11	-11	203	-10	19	-8	-1	6	28	6	24	-4	-1	-8	-5	0	-3	2	-8	62	-3	-38	-6	-8	-7	1	-15	-10	-1	-5	1	-5	4	21	6	7	-44	-61	-20	9	-7	55	5	0	-7
6.43	30	22	-62	-66	10	-11	203	-11	20	-8	-1	5	27	5	22	-3	-1	-8	-6	-1	-3	2	-8	62	-3	-38	-6	-8	-6	1	-14	-9	-3	-5	1	-5	4	21	6	7	-38	-61	-22	11	-8	54	6	1	-7
33.21	30	24	-61	-65	10	-12	203	-10	20	-8	-1	5	26	5	22	-3	-2	-8	-5	-1	-3	2	-8	62	-3	-38	-6	-8	-7	2	-15	-9	-1	-5	1	-5	4	21	6	7	-32	-61	-23	8	-7	53	6	0	-7
33.21	30	22	-61	-64	10	-12	203	-10	20	-8	-1	5	26	5	22	-3	-1	-8	-5	0	-2	2	-9	62	-2	-38	-6	-8	-6	1	-14	-9	-2	-5	2	-5	4	20	7	7	-36	-61	-24	15	-9	54	5	0	-7
40.34	30	25	-61	-64	10	-12	203	-10	20	-8	-1	5	26	5	23	-3	-1	-8	-6	0	-3	2	-9	62	-3	-38	-6	-8	-6	2	-15	-8	-2	-5	2	-5	4	20	7	7	-36	-61	-24	8	-7	53	5	0	-6
46.93	30	18	-60	-64	10	-11	203	-10	20	-8	-1	5	27	5	23	-3	-1	-9	-6	0	-3	1	-8	62	-2	-38	-6	-8	-6	1	-15	-8	-3	-5	1	-5	4	20	7	7	-33	-61	-24	16	-10	53	4	0	-6
53.51	29	23	-63	-67	10	-12	202	-11	22	-8	-1	5	27	5	23	-4	-1	-9	-6	0	-3	2	-8	62	-3	-38	-6	-9	-7	1	-15	-8	-2	-6	1	-5	4	20	7	8	-34	-61	-24	8	-6	52	6	-2	-5
67.23	30	20	-64	-68	10	-11	202	-11	22	-8	-1	6	27	6	24	-4	-1	-8	-6	0	-3	2	-8	62	-2	-37	-6	-9	-6	1	-16	-8	-2	-6	2	-5	4	20	7	8	-37	-61	-25	11	-9	54	3	0	-6
73.76	31	20	-68	-70	11	-11	203	-11	21	-8	-2	6	28	6	25	-4	-1	-8	-6	0	-3	2	-8	62	-3	-38	-6	-10	-7	1	-16	-7	-2	-6	2	-5	4	19	8	8	-36	-61	-25	18	-8	54	3	2	-7
87.48	30	21	-73	-76	11	-11	203	-11	21	-8	-2	7	30	7	26	-4	-1	-8	-6	0	-3	2	-8	62	-3	-38	-7	-10	-8	1	-18	-5	-3	-7	3	-5	4	19	8	10	-36	-61	-24	10	-7	54	6	2	-8
101.3	31	20	-83	-88	12	-10	203	-11	22	-8	-2	7	33	7	30	-5	-1	-9	-6	1	-3	2	-7	62	-2	-38	-7	-12	-8	1	-21	-7	-2	-8	3	-5	4	19	9	12	-30	-61	-25	8	-7	54	4	0	-7
114.21	32	15	-97	-105	14	-9	203	-11	23	-8	-2	9	37	8	33	-6	-1	-9	-6	2	-4	3	-7	61	-2	-38	-8	-14	-9	0	-25	-6	-2	-9	3	-5	4	18	10	14	-32	-61	-22	10	-8	54	6	-2	-7
134.51	35	14	-112	-126	18	-6	204	-11	24	-8	-2	11	41	10	38	-6	-1	-9	-6	2	-3	3	-6	61	-2	-37	-9	-18	-11	0	-28	-4	-1	-10	4	-5	5	19	10	18	-25	-60	-21	15	-6	54	6	-5	-7
148.39	37	16	-134	-156	20	-4	205	-10	22	-8	-3	12	47	11	44	-7	-1	-8	-6	4	-4	4	-5	61	-2	-37	-11	-20	-12	0	-33	-4	0	-12	4	-5	5	18	11	21	-27	-60	-21	6	-5	50	8	-7	-7
168.64	38	13	-154	-182	22	-2	205	-10	22	-7	-3	14	52	13	51	-8	0	-9	-6	4	-4	5	-4	60	-2	-38	-12	-23	-14	-1	-39	-3	0	-13	7	-5	6	17	13	24	-28	-59	-21	7	-5	51	8	-9	-6
188.95	41	10	-173	-205	25	0	206	-10	23	-8	-3	17	59	14	58	-9	0	-9	-7	5	-5	5	-2	60	-1	-38	-13	-27	-15	-1	-44	-2	0	-15	7	-4	6	17	14	28	-20	-59	-21	8	-3	52	7	-9	-7
215.68	43	8	-198	-231	29	3	207	-9	24	-7	-4	19	67	16	66	-10	-1	-9	-7	6	-5	5	-1	59	-2	-38	-14	-30	-17	-2	-49	-1	1	-18	8	-5	6	16	14	33	-21	-57	-20	5	0	51	8	-12	-9
249.64	46	3	-220	-255	32	5	209	-9	25	-7	-4	21	76	18	74	-11	0	-9	-7	7	-5	6	0	59	-2	-37	-17	-34	-18	-2	-55	3	2	-20	9	-4	7	16	16	37	-14	-57	-19	5	-3	50	8	-16	-10
269.95	48	4	-238	-273	35	8	210	-9	25	-7	-4	24	84	19	80	-11	0	-9	-7	8	-6	7	2	58	-1	-37	-18	-37	-20	-2	-60	7	2	-21	10	-4	7	16	18	40	-13	-57	-20	14	1	51	8	-18	-10
290.25	49	-3	-259	-291	39	10	211	-9	25	-6	-4	26	91	20	88	-12	0	-8	-7	9	-6	7	3	58	-2	-38	-19	-40	-21	-3	-64	6	2	-23	10	-4	8	15	19	44	-3	-56	-18	2	0	49	12	-19	-8
324.22	52	-8	-283	-313	43	13	212	-9	26	-6	-5	28	100	22	97	-13	0	-9	-7	10	-7	8	5	57	-2	-38	-21	-45	-25	-3	-70	8	3	-25	12	-4	8	15	20	48	0	-56	-19	6	0	50	12	-22	-8
351	54	-13	-302	-329	47	15	213	-9	26	-6	-5	31	108	23	104	-15	0	-9	-8	11	-8	8	6	57	-2	-38	-22	-48	-26	-4	-75	9	3	-26	12	-4	8	14	21	52	-5	-55	-19	6	0	50	9	-23	-10
371.3	57	-6	-318	-342	50	18	215	-8	28	-6	-5	32	115	24	110	-15	0	-9	-7	11	-8	8	7	57	-2	-37	-23	-50	-27	-4	-79	9	4	-28	13	-5	8	14	22	54	4	-55	-19	10	3	48	8	-24	-11
391.5	57	-17	-335	-356	52	19	216	-9	27	-6	-5	35	121	25	116	-16	0	-8	-7	11	-8	8	8	56	-2	-38	-25	-53	-28	-5	-83	10	4	-29	13	-5	9	13	23	58	0	-54	-18	6	2	51	11	-27	-10
411.75	60	-21	-349	-367	55	21	218	-8	28	-6	-5	36	128	26	123	-16	0	-8	-8	12	-9	9	9	56	-2	-38	-26	-55	-30	-5	-87	10	4	-31	14	-5	9	12	24	61	11	-54	-18	5	0	49	9	-29	-10
432.05	61	-24	-363	-378	58	23	218	-9	28	-6	-6	38	134	26	128	-17	-1	-8	-8	13	-9	9	10	55	-2	-38	-27	-58	-32	-5	-91	11	4	-32	14	-5	9	12	25	64	3	-53	-18	6	1	47	11	-32	-12
458.84	63	-22	-381	-393	61	25	219	-9	27	-5	-5	40	143	29	136	-18	-1	-8	-8	13	-10	10	12	54	-3	-38	-29	-62	-33	-6	-96	13	4	-35	15	-5	10	11	26	68	10	-52	-18	5	5	45	12	-35	-11
485.57	64	-28	-401	-408	65	28	220	-9	28	-5	-6	42	151	30	142	-19	0	-8	-8	15	-10	10	14	54	-2	-38	-29	-65	-34	-6	-102	14	4	-36	16	-5	10	11	27	72	25	-52	-17	3	5	47	11	-34	-11
519.7	66	-38	-421	-423	69	30	221	-9	28	-5	-6	45	161	31	151	-20	-1	-8	-8	16	-11	11	15	53	-2	-38	-32	-69	-36	-7	-108	17	5	-38	18	-5	11	10	29	77	25	-51	-17	2	2	47	11	-38	-12
560.25	70	-40	-445	-443	74	34	222	-9	29	-4	-6	48	173	32	161	-21	-1	-8	-8	17	-12	12	18	53	-2	-38	-33	-74	-39	-7	-115	17	6	-40	19	-4	11	10	31	82	21	-50	-17	2	5	45	13	-41	-12
587.03	71	-42	-466	-459	78	37	223	-9	29	-4	-6	51	182	34	169	-22	-1	-8	-8	17	-12	12	20	53	-2	-38	-34	-78	-41	-7	-121	21	7	-42	19	-4	12	9	31	86	44	-50	-17	3	7	44	13	-43	-13
614.47	74	-47	-486	-475	82	40	224	-9	29	-4	-6	53	192	35	177	-23	-1	-8	-8	18	-13	12	22	52	-3	-38	-36	-81	-42	-8	-126	22	8	-44	20	-4	12	8	32	90	41	-49	-18	2	6	43	14	-47	-16
634.77	75	-47	-501	-486	84	42	224	-9	28	-4	-6	54	198	36	182	-24	-1	-8	-8	19	-13	12	23	52	-3	-38	-37	-83	-43	-8	-129	24	7	-45	21	-4	12	8	33	92	31	-49	-19	5	8	44	16	-47	-14
641.25	77	-46	-508	-492	86	43	224	-9	29	-4	-6	55	202	36	186	-24	-1	-7	-8	19	-13	13	23	52	-3	-38	-37	-84	-44	-8	-131	22	8	-45	22	-4	12	8	35	94	41	-49	-19	4	8	44	16	-49	-13
655.02	77	-47	-519	-500	88	45	226	-9	29	-4	-6	56	207	36	190	-25	-1	-8	-8	19	-14	13	24	52	-3	-38	-38	-86	-45	-9	-134	24	8	-47	23	-5	12	8	35	95	51	-49	-17	1	11	42	16	-50	-14
675.27	78	-149	-532	-509	90	47	224	-10	30	-3	-7	57	214	37	195	-25	-1	-8	-8	19	-14	13	26	51	-3	-38	-39	-89	-46	-9	-137	24	8	-49	24	-4	12	7	36	97	64	-49	-15	2	9	43	15	-49	-15
681.8	79	-57	-540	-516	92	49	224	-10	29	-4	-7	58	219	37	199	-25	-1	-8	-8	20	-15	13	26	51	-3	-39	-40	-90	-46	-9	-139	22	8	-50	24	-5	13	6	35	98	55	-49	-20	1	8	42	15	-53	-16
688.28	79	-56	-546	-521	94	50	226	-10	30	-4	-7	58	222	38	201	-25	-1	-8	-9	20	-15	13	27	51	-3	-39	-40	-91	-47	-10	-140	23	8	-51	23	-5	12	6	36	99	53	-48	-18	2	7	41	17	-54	-13
695.52	81	-56	-550	-525	95	51	226	-10	30	-3	-7	58	226	38	202	-25	-1	-8	-8	20	-16	13	28	50	-3	-39	-40	-92	-48	-9	-142	24	9	-51	24	-5	13	6	37	100	52	-48	-18	2	7	44	16	-52	-16
702.05	80	-56	-557	-530	96	52	226	-10	29	-4	-7	58	229	38	205	-25	-1	-8	-8	20	-16	13	28	50	-3	-39	-41	-93	-48	-9	-143	25	9	-51	24	-5	13	5	37	100	45	-48	-17	0	9	42	16	-53	-18
708.53	80	-58	-564	-536	97	54	226	-10	30	-3	-7	59	234	38	207	-25	-2	-8	-9	20	-16	13	28	50	-3	-39	-41	-94	-49	-9	-145	26	10	-52	24	-5	12	5	37	101	65	-48	-18	1	8	42	14	-56	-14
702.05	82	-58	-581	-551	98	58	212	-7	32	-2	-6	60	245	40	215	-20	0	-11	-9	19	-18	13	29	49	-5	-41	-40	-94	-49	-7	-146	23	11	-53	22	-6	12	-5	35	99	63	-51	-46	-5	9	40	12	-55	-16
675.22	81	-62	-581	-551	97	58	211	-7	33	-2	-6	60	245	39	214	-21	-1	-10	-9	19	-18	12	29	49	-5	-40	-40	-94	-48	-7	-146	23	10	-52	21	-6	12	-5	34	99	59	-51	-48	-1	8	38	16	-57	-15
586.98	81	-58	-571	-543	95	55	211	-7	34	-2	-6	59	239	39	209	-20	0	-10	-9	19	-17	12	28	49	-5	-41	-38	-91	-47	-7	-141	21	10	-51	21	-6	12	-5	33	94	53	-52	-50	3	9	38	15	-56	-14
519.64	76	-50	-534	-511	86	49	208	-6	33	-3	-6	52	217	36	189	-17	0	-10	-9	17	-16	11	23	50	-4	-41	-35	-80	-42	-6	-125	18	8	-43	18	-6	10	-3	29	81	43	-53	-51	-1	7	39	13	-52	-14
371.14	65	-28	-447	-440	66	35	203	-6	32	-4	-5	40	169	30	149	-13	0	-9	-9	12	-12	9	13	53	-4	-42	-28	-62	-33	-4	-96	8	6	-33	15	-6	8	-1	23	59	13	-56	-52	2	5	41	12	-38	-14
269.84	58	-18	-371	-379	51	23	200	-6	32	-5	-4	32	132	24	120	-10	0	-9	-8	10	-10	7	7	55	-3	-41	-22	-48	-26	-3	-77	3	4	-26	12	-6	7	1	19	45	6	-58	-54	2	1	42	11	-30	-11
188.78	52	-8	-306	-323	37	14	197	-6	33	-6	-4	25	103	21	96	-8	0	-9	-8	7	-8	6	2	56	-3	-41	-18	-38	-21	-2	-62	1	2	-21	8	-7	6	2	14	34	-9	-59	-57	16	1	46	6	-20	-11
134.41	46	-5	-259	-281	29	8	195	-6	33	-6	-4	20	86	18	80	-6	1	-9	-8	5	-8	5	-1	57	-3	-41	-14	-32	-18	-1	-52	-1	1	-18	6	-7	5	2	12	27	-23	-60	-58	16	-3	45	8	-18	-9
65.45	41	2	-208	-230	22	2	193	-6	33	-7	-4	15	67	15	64	-5	0	-9	-8	3	-6	3	-4	58	-3	-41	-12	-25	-14	0	-40	-3	0	-14	4	-7	4	3	9	19	-31	-62	-59	7	-6	48	4	-14	-9
6.37	36	5	-161	-180	15	-3	191	-7	31	-7	-3	12	53	12	50	-3	0	-8	-7	2	-5	2	-6	60	-4	-41	-10	-20	-12	0	-31	-6	-1	-11	2	-8	3	4	7	13	-29	-63	-60	18	-8	50	3	-9	-8
-0.22	33	7	-132	-142	12	-6	190	-7	32	-7	-3	10	46	10	43	-2	0	-9	-7	1	-5	2	-7	59	-4	-40	-8	-16	-10	1	-27	-7	-2	-10	1	-8	3	4	6	10	-33	-63	-60	18	-9	50	3	-8	-9
-0.22	32	11	-115	-119	10	-7	189	-7	31	-7	-3	8	42	9	39	-2	0	-9	-7	0	-5	1	-8	60	-4	-40	-8	-14	-9	1	-24	-7	-2	-9	0	-8	2	4	5	8	-42	-64	-62	17	-8	48	4	-7	-8
-0.22	31	15	-99	-101	9	-10	188	-7	31	-7	-2	7	38	8	35	-1	-1	-9	-7	0	-5	0	-9	60	-4	-40	-7	-12	-9	1	-21	-9	-2	-8	-1	-8	2	4	4	6	-40	-64	-62	15	-9	49	4	-6	-7
-0.16	30	17	-85	-86	7	-11	187	-7	31	-7	-2	6	34	7	32	-1	-1	-9	-7	0	-5	0	-10	60	-4	-40	-6	-11	-8	1	-19	-8	-2	-7	-1	-8	2	4	4	5	-40	-64	-62	6	-9	48	2	-3	-8
-0.16	28	20	-68	-72	5	-12	186	-8	29	-8	-2	4	30	5	27	-1	-2	-9	-7	-2	-5	0	-10	60	-4	-40	-7	-10	-8	1	-17	-12	-1	-7	-1	-9	1	4	3	3	-40	-65	-62	7	-9	49	3	-2	-9
26.62	28	15	-66	-71	5	-12	186	-8	31	-8	-2	4	29	6	27	-1	-1	-9	-7	-1	-5	0	-10	60	-4	-40	-6	-10	-8	0	-16	-10	-2	-6	-1	-8	2	4	3	3	-39	-64	-63	8	-11	49	3	-3	-7
26.68	28	18	-66	-70	5	-12	186	-8	31	-8	-2	4	29	6	27	-1	-1	-9	-7	-2	-5	0	-10	60	-4	-39	-6	-11	-8	1	-16	-10	-2	-7	-2	-9	2	4	3	3	-37	-65	-64	17	-10	48	3	-3	-5
33.26	28	18	-66	-70	5	-12	186	-8	31	-8	-2	4	29	6	27	-1	-1	-9	-7	-1	-5	0	-10	60	-4	-40	-6	-10	-8	1	-16	-8	-3	-7	-2	-9	1	4	3	3	-40	-65	-64	6	-10	48	3	-3	-7
40.39	28	16	-67	-71	5	-12	186	-8	31	-8	-3	4	29	5	27	-2	-2	-9	-7	-2	-4	0	-11	60	-4	-40	-7	-10	-8	1	-17	-9	-3	-7	-1	-9	2	3	3	3	-47	-65	-64	7	-10	48	3	-3	-8
46.98	29	19	-68	-71	6	-12	186	-8	31	-8	-3	4	29	6	28	-2	-1	-10	-7	-2	-5	0	-10	60	-4	-39	-7	-11	-8	0	-17	-9	-3	-7	-1	-9	2	3	3	3	-45	-65	-63	18	-9	49	5	-5	-7
53.57	29	16	-69	-72	6	-12	186	-8	31	-8	-3	4	30	6	28	-2	-2	-10	-7	-1	-5	0	-10	60	-4	-39	-7	-11	-9	0	-18	-10	-2	-8	-1	-9	2	3	4	3	-36	-65	-63	7	-10	50	3	-4	-8
60.7	29	15	-72	-74	6	-12	185	-8	32	-9	-3	5	30	6	29	-2	-2	-10	-7	-1	-5	0	-10	60	-4	-40	-7	-11	-8	0	-18	-10	-2	-7	-1	-9	2	3	4	4	-37	-65	-64	6	-10	47	4	-3	-9
67.18	28	18	-75	-77	6	-12	185	-8	32	-9	-3	5	31	6	30	-2	-2	-10	-7	-1	-5	0	-10	60	-4	-39	-8	-12	-9	0	-19	-9	-3	-8	-2	-8	2	3	4	5	-38	-65	-65	17	-8	47	4	-6	-7
73.76	30	17	-79	-79	7	-11	186	-8	34	-8	-4	5	32	7	31	-3	-2	-10	-7	-1	-5	0	-10	60	-4	-39	-8	-13	-9	0	-21	-9	-2	-8	0	-8	2	3	4	5	-39	-65	-64	7	-9	47	3	-5	-7
87.43	29	14	-85	-87	8	-11	185	-8	34	-8	-4	5	34	7	33	-3	-2	-10	-7	0	-5	0	-9	59	-4	-39	-8	-14	-10	0	-23	-9	-1	-9	0	-8	2	3	5	7	-34	-65	-62	8	-9	47	4	-5	-9
94.01	30	15	-97	-100	9	-10	186	-8	35	-8	-4	7	37	8	35	-3	-2	-10	-7	0	-5	0	-9	59	-4	-39	-9	-15	-11	0	-25	-8	-3	-10	0	-9	2	3	5	9	-33	-64	-62	6	-7	48	3	-6	-8
107.78	33	13	-109	-115	11	-8	187	-8	34	-8	-4	7	40	9	39	-4	-2	-10	-7	1	-5	1	-8	59	-4	-39	-10	-18	-11	-1	-28	-9	-1	-11	0	-8	3	2	6	10	-32	-64	-62	16	-8	49	2	-7	-9
128.09	33	7	-125	-139	12	-7	187	-8	33	-8	-5	9	44	9	44	-5	-2	-11	-7	1	-6	2	-8	58	-4	-39	-11	-20	-12	-1	-31	-7	-1	-12	1	-8	3	2	6	14	-35	-63	-61	6	-9	47	6	-9	-8
141.8	34	10	-143	-164	14	-5	188	-8	35	-8	-5	11	49	11	49	-6	-1	-10	-7	2	-6	3	-7	58	-4	-39	-11	-23	-14	-1	-36	-4	-1	-14	2	-8	3	2	7	16	-30	-63	-61	5	-6	46	6	-9	-9
162.05	36	3	-162	-190	18	-3	188	-8	37	-8	-5	12	54	12	55	-6	-1	-10	-8	3	-6	3	-6	57	-3	-39	-13	-26	-15	-2	-41	-4	-1	-15	3	-7	4	1	9	20	-24	-63	-61	7	-7	49	2	-7	-7
182.3	38	6	-177	-209	20	-1	189	-7	37	-8	-5	14	59	14	60	-7	-1	-10	-8	4	-6	3	-5	57	-3	-40	-14	-28	-16	-2	-44	-3	-1	-17	4	-8	4	1	10	23	-27	-62	-60	15	-5	46	6	-14	-9
202.55	41	5	-197	-230	22	1	189	-7	38	-8	-6	16	65	15	66	-8	-2	-10	-8	5	-7	4	-3	57	-3	-39	-16	-31	-18	-2	-49	-1	0	-18	5	-7	5	1	11	26	-15	-62	-59	4	-4	46	6	-15	-9
222.86	42	1	-218	-254	26	3	190	-8	38	-8	-6	18	73	16	74	-9	-1	-10	-8	5	-7	5	-3	57	-3	-40	-17	-34	-19	-3	-54	2	0	-20	6	-7	5	1	13	30	-16	-61	-60	16	-4	47	4	-15	-10
243.22	44	-6	-238	-274	29	5	190	-7	39	-8	-6	20	80	17	80	-10	-1	-10	-8	6	-8	5	-1	56	-3	-39	-18	-37	-21	-3	-59	3	1	-21	8	-7	5	0	13	33	-14	-61	-60	5	-5	46	6	-19	-9
263.47	47	-4	-254	-288	31	8	191	-7	40	-8	-6	22	86	18	86	-10	-1	-10	-8	7	-8	5	-1	56	-3	-39	-19	-40	-23	-4	-62	3	1	-22	7	-7	5	0	14	35	-14	-60	-60	3	-2	46	5	-18	-14
283.77	47	-9	-269	-303	34	10	191	-7	40	-7	-7	23	92	19	92	-11	-1	-10	-9	7	-8	6	1	55	-3	-39	-21	-42	-24	-4	-66	3	2	-24	8	-7	6	0	14	38	-6	-60	-60	5	-3	45	8	-20	-9
303.97	49	-9	-288	-320	37	12	191	-7	40	-7	-7	26	100	21	99	-11	-2	-10	-9	8	-9	6	2	55	-3	-39	-21	-45	-26	-4	-71	4	2	-25	9	-7	6	-1	15	42	-4	-60	-60	13	-2	44	6	-21	-9
324.22	50	-15	-304	-335	40	14	192	-7	40	-7	-7	27	106	22	105	-12	-1	-10	-9	9	-9	6	3	54	-3	-40	-23	-48	-27	-4	-75	7	2	-27	9	-7	6	-1	18	45	2	-59	-59	2	-2	44	10	-27	-12
351	52	-13	-325	-352	45	17	193	-7	41	-7	-7	29	115	22	112	-12	-1	-10	-9	10	-10	6	5	54	-3	-40	-24	-52	-29	-5	-80	7	2	-29	10	-7	7	-1	19	49	9	-59	-59	3	2	44	9	-25	-11
371.3	55	-17	-339	-365	48	20	194	-7	42	-6	-7	31	122	23	118	-13	-2	-10	-9	11	-10	7	6	54	-3	-39	-25	-54	-30	-5	-84	7	3	-30	9	-7	7	-2	19	52	11	-58	-55	13	1	45	8	-29	-11
384.26	56	-21	-351	-374	50	21	194	-7	41	-7	-7	32	127	24	122	-14	-1	-10	-9	10	-10	7	7	54	-3	-40	-26	-55	-31	-5	-86	10	2	-31	11	-6	7	-2	20	53	13	-58	-58	2	1	43	8	-29	-12
397.98	56	-19	-360	-381	51	22	194	-7	42	-6	-7	33	131	25	125	-14	-1	-10	-9	11	-11	7	7	53	-3	-40	-26	-57	-31	-5	-88	11	4	-32	11	-7	7	-2	21	55	8	-58	-59	4	3	45	9	-28	-12
404.62	57	-22	-367	-388	53	23	194	-7	42	-7	-8	34	135	25	128	-14	-1	-10	-9	11	-11	7	8	53	-4	-40	-27	-58	-32	-5	-90	9	3	-32	12	-6	8	-2	21	56	-4	-58	-58	9	3	41	9	-33	-14
418.28	58	-26	-374	-394	54	24	194	-7	43	-6	-8	34	138	25	130	-15	-1	-10	-9	11	-11	8	8	53	-4	-40	-28	-59	-32	-6	-92	10	3	-33	11	-7	7	-2	21	57	0	-58	-59	2	0	43	7	-33	-11
424.93	58	-26	-382	-399	55	25	194	-7	42	-6	-8	35	141	25	133	-15	-2	-10	-9	11	-12	8	9	52	-4	-40	-28	-60	-33	-6	-94	10	4	-33	12	-7	8	-3	22	59	13	-58	-58	2	1	43	8	-32	-15
445.12	59	-26	-393	-408	58	27	194	-7	43	-6	-8	37	148	26	138	-15	-1	-10	-9	12	-12	8	10	52	-4	-40	-29	-63	-34	-6	-98	12	5	-34	13	-7	8	-3	23	62	17	-57	-57	3	3	43	9	-32	-12
465.37	61	-29	-410	-420	61	30	195	-7	44	-6	-8	39	156	28	145	-16	-1	-11	-9	13	-12	8	12	52	-4	-40	-30	-66	-36	-6	-103	13	4	-37	14	-7	8	-4	24	65	24	-57	-57	1	5	41	13	-36	-12
492.91	63	-31	-426	-433	66	32	196	-7	44	-6	-8	41	166	29	152	-17	-1	-11	-9	13	-13	9	14	52	-4	-40	-31	-69	-37	-7	-107	15	5	-38	14	-7	9	-4	25	69	20	-56	-60	2	6	42	11	-39	-9
519.7	66	-38	-443	-447	69	35	197	-7	45	-6	-7	42	175	30	158	-18	-1	-11	-9	14	-14	9	17	51	-4	-40	-32	-72	-39	-7	-113	18	5	-40	14	-6	9	-4	25	72	28	-56	-57	13	4	40	12	-41	-12
539.95	67	-38	-459	-459	72	37	197	-7	46	-6	-8	44	182	31	164	-18	-2	-10	-10	15	-14	9	18	50	-4	-40	-34	-75	-40	-7	-117	17	5	-41	15	-7	9	-5	26	75	31	-55	-57	-1	6	38	11	-43	-13
560.25	70	-43	-472	-469	75	40	198	-7	46	-5	-8	46	189	32	170	-19	-2	-11	-9	16	-15	10	19	50	-4	-40	-35	-78	-42	-8	-121	17	5	-42	16	-7	10	-5	27	79	36	-55	-57	13	5	41	11	-44	-15
587.03	71	-46	-491	-483	78	42	198	-8	46	-5	-8	48	198	33	177	-20	-2	-11	-9	16	-15	10	20	50	-5	-40	-36	-81	-43	-8	-126	20	7	-44	17	-6	10	-6	29	83	46	-55	-55	2	5	41	12	-46	-14
614.47	72	-51	-508	-496	82	45	199	-8	47	-5	-8	50	207	34	184	-20	-2	-11	-10	17	-16	11	22	49	-5	-40	-37	-84	-45	-8	-131	22	6	-46	18	-7	10	-6	30	86	41	-54	-57	2	7	42	12	-46	-16
641.2	74	-56	-527	-510	86	48	199	-8	48	-5	-8	52	217	35	192	-21	-2	-11	-10	18	-16	11	24	49	-4	-40	-38	-87	-46	-9	-135	23	6	-49	18	-6	11	-7	31	90	45	-54	-57	7	6	42	12	-49	-15
666.52	76	-58	-543	-523	89	50	199	-8	48	-4	-8	54	226	36	200	-22	-2	-11	-10	18	-17	12	25	49	-5	-40	-40	-91	-48	-9	-140	24	8	-50	19	-6	11	-7	32	93	53	-54	-57	3	6	41	14	-53	-14
688.28	78	-62	-562	-538	93	54	200	-8	47	-4	-8	56	235	37	207	-22	-2	-12	-9	19	-18	13	27	48	-5	-40	-41	-94	-49	-10	-145	23	8	-52	20	-6	12	-7	33	96	56	-54	-57	1	8	37	14	-56	-16
708.53	80	-63	-575	-548	97	57	201	-8	47	-4	-8	58	242	38	212	-23	-2	-11	-10	19	-18	12	29	48	-5	-40	-42	-96	-51	-9	-148	26	9	-53	21	-6	12	-8	34	99	59	-54	-55	1	9	37	15	-57	-14
728.84	82	-64	-588	-558	100	60	201	-8	48	-3	-8	59	249	39	218	-23	-2	-11	-9	20	-18	13	30	48	-5	-40	-43	-99	-51	-9	-152	27	9	-54	21	-6	12	-8	35	101	41	-55	-55	10	8	36	15	-59	-16
742.55	82	-64	-600	-567	102	62	201	-8	48	-3	-8	60	256	39	222	-24	-1	-12	-9	20	-19	13	31	48	-4	-40	-43	-100	-52	-9	-154	28	10	-55	22	-6	13	-8	35	104	71	-55	-57	0	11	37	15	-60	-16
756.27	85	-70	-609	-573	107	64	202	-8	49	-2	-8	61	263	40	225	-23	-1	-11	-9	20	-19	13	33	48	-5	-40	-43	-101	-52	-9	-157	28	10	-56	22	-6	13	-8	36	104	68	-55	-58	12	8	39	15	-60	-14
762.75	85	-75	-617	-579	108	66	202	-8	49	-2	-8	61	267	40	228	-23	-1	-11	-9	21	-19	13	33	48	-5	-40	-44	-103	-54	-9	-158	29	9	-57	24	-6	13	-9	37	106	60	-56	-57	0	8	37	17	-62	-16
776.57	86	-70	-625	-585	110	69	202	-9	48	-2	-8	62	273	40	231	-23	-1	-11	-9	21	-20	14	35	48	-5	-40	-44	-105	-54	-9	-160	31	11	-57	23	-6	13	-9	36	107	71	-55	-57	10	10	38	15	-63	-18
783.05	87	-70	-632	-591	112	72	202	-8	49	-2	-8	63	279	41	234	-23	-1	-11	-9	21	-20	14	36	47	-5	-40	-45	-106	-54	-9	-162	29	11	-57	24	-6	13	-9	37	108	74	-56	-55	-4	10	35	16	-64	-17
793.96	87	-76	-639	-597	114	73	202	-9	49	-2	-8	63	285	41	237	-23	-1	-11	-9	21	-20	14	37	47	-5	-40	-45	-107	-55	-9	-164	30	11	-58	23	-6	13	-9	37	110	76	-56	-55	1	8	36	15	-67	-16
803.3	86	-72	-646	-603	116	76	202	-10	49	-1	-9	64	291	41	241	-23	0	-12	-9	21	-21	14	38	47	-5	-40	-45	-109	-55	-9	-165	31	11	-58	24	-6	13	-10	38	110	69	-56	-57	1	10	39	16	-63	-16
803.3	86	-71	-651	-607	117	78	201	-10	49	-1	-9	65	295	42	244	-23	0	-12	-9	21	-21	14	39	47	-5	-40	-46	-109	-56	-9	-167	30	12	-59	25	-6	13	-10	39	111	70	-57	-55	1	10	37	18	-65	-14
809.78	86	-73	-655	-610	118	79	201	-9	49	-1	-9	65	298	42	246	-23	0	-12	-9	21	-21	14	40	47	-5	-40	-46	-110	-56	-9	-167	33	12	-59	25	-6	14	-10	39	113	68	-57	-57	0	11	37	17	-65	-16
809.78	86	-71	-658	-612	119	80	201	-10	48	0	-9	65	300	42	246	-23	-1	-12	-9	21	-21	14	40	47	-5	-40	-46	-110	-56	-9	-169	32	12	-59	24	-6	13	-10	38	113	71	-57	-57	1	12	38	17	-65	-16
796.82	88	-53	-671	-626	118	84	183	-11	38	-1	-9	65	313	42	259	-28	-1	-15	-9	21	-22	14	41	47	-6	-41	-44	-109	-55	-6	-165	29	14	-59	-71	47	35	-9	56	113	76	12	-53	-6	9	32	16	-70	-16
796.82	88	-54	-669	-626	118	84	183	-11	41	-1	-10	65	313	42	258	-28	-2	-16	-9	21	-22	14	42	47	-6	-41	-44	-109	-54	-7	-165	29	14	-59	-71	47	35	-10	56	111	80	11	-57	-2	7	35	14	-69	-16
796.88	88	-53	-669	-626	118	84	183	-11	43	-1	-9	65	313	43	258	-28	-1	-15	-9	21	-22	14	42	47	-5	-41	-44	-109	-54	-7	-165	31	14	-59	-71	48	34	-10	56	111	78	11	-58	11	9	35	14	-70	-16
796.82	87	-57	-669	-626	118	83	182	-11	42	-1	-10	65	313	42	259	-29	-1	-16	-10	21	-22	14	42	47	-6	-41	-44	-109	-54	-7	-165	31	13	-59	-71	47	35	-10	55	111	76	11	-59	-3	8	34	13	-68	-17
783	88	-44	-667	-626	118	83	181	-11	43	-1	-10	65	313	42	258	-28	-1	-15	-9	21	-21	14	42	47	-6	-41	-44	-109	-54	-7	-165	31	13	-59	-71	47	34	-9	55	111	80	11	-59	10	10	35	15	-70	-17
722.2	88	-44	-665	-623	117	83	180	-11	44	-1	-10	64	311	41	257	-28	-1	-15	-9	20	-22	14	41	47	-6	-41	-43	-108	-54	-7	-163	31	13	-58	-72	48	35	-9	54	109	77	11	-59	-1	9	35	15	-70	-16
667.87	88	-45	-653	-613	115	81	179	-11	43	-1	-9	62	303	41	250	-27	-1	-15	-9	20	-21	13	40	47	-6	-41	-42	-103	-52	-7	-158	29	11	-56	-73	48	34	-8	53	103	67	10	-59	0	8	35	16	-68	-15
586.87	81	-41	-615	-581	104	74	177	-10	44	-2	-9	57	277	38	229	-26	-1	-15	-9	18	-19	12	34	49	-5	-41	-38	-92	-47	-6	-142	25	10	-50	-75	47	32	-7	48	91	47	10	-60	13	5	36	14	-62	-15
458.73	72	-25	-542	-521	84	57	173	-10	46	-5	-9	46	228	34	194	-22	-1	-14	-9	15	-16	10	25	51	-4	-41	-32	-76	-39	-4	-118	19	7	-40	-78	47	31	-4	44	71	34	10	-61	1	3	38	9	-49	-14
337.12	64	-5	-461	-457	65	41	169	-9	43	-6	-8	36	180	28	157	-19	-1	-13	-9	12	-13	8	17	53	-4	-41	-26	-60	-32	-3	-93	12	4	-32	-82	47	29	-2	39	54	13	8	-65	3	1	39	7	-40	-12
222.75	54	16	-368	-381	44	25	163	-9	43	-7	-8	27	130	21	120	-15	-1	-13	-8	8	-9	6	6	55	-3	-41	-20	-45	-24	-2	-69	4	3	-24	-85	46	27	0	34	37	-2	6	-67	8	1	39	5	-30	-12
107.62	45	26	-274	-299	27	11	159	-9	44	-8	-7	18	91	16	88	-12	-1	-13	-8	5	-8	4	0	57	-4	-41	-14	-32	-18	0	-51	0	2	-18	-89	46	26	1	29	24	-23	5	-67	6	-5	41	4	-21	-9
67.07	41	35	-218	-244	19	4	157	-10	44	-9	-6	14	73	14	71	-10	-1	-13	-8	3	-7	3	-3	58	-4	-41	-12	-26	-15	0	-41	-2	1	-14	-91	46	25	1	27	18	-22	4	-68	15	-4	45	2	-14	-10
33.16	37	36	-173	-197	13	-1	155	-9	44	-9	-6	10	59	11	59	-9	-2	-13	-7	1	-6	2	-5	58	-4	-41	-10	-21	-13	0	-32	-7	1	-12	-92	45	24	2	25	13	-30	3	-69	6	-8	44	3	-13	-7
6.37	33	40	-143	-156	9	-4	154	-10	43	-10	-5	8	50	9	50	-8	-2	-13	-7	0	-6	1	-6	59	-5	-41	-9	-18	-11	1	-28	-8	0	-10	-94	45	24	2	24	8	-30	2	-70	5	-6	42	3	-10	-9
-0.27	32	41	-124	-129	7	-6	153	-10	43	-10	-5	6	45	8	45	-8	-2	-13	-7	0	-5	1	-7	59	-4	-40	-8	-15	-10	1	-25	-8	-1	-9	-95	45	24	2	23	7	-36	2	-70	13	-9	44	-1	-7	-10
-0.22	31	46	-109	-112	6	-7	153	-10	44	-10	-5	6	42	8	42	-7	-2	-13	-7	-1	-5	0	-8	59	-5	-40	-8	-14	-10	1	-22	-8	-1	-8	-96	45	24	3	22	5	-33	2	-70	4	-6	43	2	-8	-8
-0.22	30	45	-98	-100	4	-8	152	-10	45	-10	-5	4	38	7	39	-7	-3	-13	-7	0	-5	0	-8	59	-5	-40	-7	-13	-9	1	-19	-8	-1	-8	-96	45	23	2	22	4	-31	2	-68	7	-8	43	1	-7	-9
-0.16	29	44	-79	-85	3	-11	151	-11	42	-11	-5	3	33	5	34	-7	-3	-13	-6	-1	-5	0	-9	60	-5	-39	-6	-11	-9	2	-17	-10	-1	-7	-97	45	23	3	21	2	-37	2	-68	5	-11	45	2	-7	-7
20.03	28	41	-68	-78	2	-11	151	-11	42	-11	-5	2	30	5	32	-7	-3	-13	-7	-2	-4	0	-10	60	-5	-39	-6	-10	-8	1	-15	-12	-2	-6	-98	44	23	3	20	1	-35	1	-69	5	-11	46	2	-7	-7
26.62	28	43	-68	-77	1	-11	150	-11	43	-10	-5	2	30	5	32	-7	-3	-13	-6	-2	-5	0	-10	60	-5	-39	-6	-10	-8	1	-15	-11	-1	-6	-97	44	23	3	20	1	-41	1	-70	5	-10	43	4	-5	-8
33.21	28	42	-69	-77	2	-11	150	-11	45	-11	-5	2	30	5	33	-7	-3	-14	-6	-1	-5	0	-9	59	-4	-39	-6	-10	-8	1	-16	-10	-1	-6	-98	45	23	2	20	1	-36	1	-70	7	-11	46	0	-6	-9
40.39	28	40	-70	-78	2	-11	150	-11	47	-11	-5	3	31	5	33	-7	-3	-13	-6	-2	-4	0	-10	60	-4	-39	-7	-11	-8	1	-16	-9	-1	-6	-98	44	23	3	20	2	-38	1	-71	7	-12	44	2	-4	-8
46.98	28	45	-71	-79	3	-11	150	-10	46	-10	-5	3	31	5	33	-6	-3	-13	-7	-1	-4	0	-9	60	-5	-39	-7	-10	-8	1	-16	-9	-1	-7	-98	44	23	3	20	2	-33	1	-70	11	-9	44	1	-6	-7
46.93	29	42	-73	-80	3	-11	150	-11	46	-11	-5	3	32	5	34	-7	-3	-13	-6	-2	-5	0	-9	60	-4	-39	-7	-11	-8	1	-17	-10	0	-7	-97	45	23	3	21	2	-34	1	-70	8	-10	46	3	-6	-8
53.46	29	43	-75	-81	3	-10	150	-10	46	-11	-5	3	33	5	35	-7	-3	-14	-6	-1	-5	0	-9	60	-4	-38	-7	-11	-8	1	-17	-8	-1	-7	-98	45	23	3	20	3	-35	1	-70	5	-9	44	3	-7	-7
60.75	30	41	-78	-82	4	-10	150	-10	48	-10	-5	3	34	6	36	-7	-3	-13	-7	-1	-5	1	-9	60	-4	-38	-7	-11	-9	1	-18	-8	-2	-7	-98	44	23	3	21	3	-39	1	-71	6	-10	45	3	-7	-7
67.18	30	40	-83	-86	5	-10	151	-10	48	-10	-5	4	35	7	37	-7	-2	-13	-6	0	-5	2	-8	60	-4	-38	-7	-12	-8	1	-19	-6	-1	-7	-98	44	23	2	20	4	-36	1	-70	8	-11	46	0	-6	-7
73.71	31	43	-88	-91	6	-9	151	-11	48	-10	-5	5	36	7	38	-7	-3	-13	-6	-1	-5	2	-8	60	-4	-38	-8	-13	-9	1	-21	-8	0	-8	-97	44	24	2	21	5	-39	1	-70	7	-8	44	5	-9	-8
81.05	32	43	-95	-98	6	-8	151	-10	48	-10	-5	5	38	7	40	-7	-3	-14	-6	0	-5	2	-8	59	-4	-38	-8	-14	-10	1	-22	-7	0	-8	-97	44	24	2	21	6	-33	2	-70	14	-8	43	2	-7	-9
87.43	31	42	-104	-108	7	-8	151	-10	48	-10	-6	6	40	8	42	-8	-3	-13	-7	0	-5	2	-7	59	-4	-38	-8	-15	-10	1	-24	-6	0	-9	-97	44	24	2	20	7	-31	2	-70	4	-7	43	4	-8	-9
107.73	32	40	-116	-123	8	-6	152	-10	49	-10	-6	7	43	8	46	-9	-2	-13	-7	1	-5	2	-7	59	-4	-38	-9	-16	-11	1	-27	-6	1	-10	-97	45	24	2	21	10	-30	2	-69	4	-8	45	0	-9	-9
121.55	33	39	-131	-146	10	-5	152	-10	49	-11	-6	8	47	9	50	-9	-3	-13	-7	2	-5	3	-6	58	-4	-38	-10	-20	-12	0	-30	-6	2	-11	-96	45	24	1	22	13	-34	2	-68	6	-6	43	5	-10	-9
141.8	35	34	-149	-173	12	-3	152	-10	49	-10	-7	10	52	10	56	-10	-3	-13	-7	2	-5	3	-5	58	-3	-39	-11	-22	-13	0	-34	-3	1	-13	-96	44	25	1	23	16	-34	3	-68	10	-8	44	2	-12	-11
162.05	37	29	-169	-202	15	-1	154	-10	49	-10	-7	12	58	12	62	-11	-2	-13	-7	4	-6	3	-4	58	-3	-38	-12	-25	-15	0	-40	-2	1	-15	-95	45	25	1	24	20	-25	3	-67	5	-8	43	2	-14	-9
182.3	39	30	-189	-225	19	1	154	-10	50	-10	-7	13	63	13	68	-12	-2	-13	-7	4	-6	4	-3	57	-3	-38	-13	-28	-16	-1	-44	-1	1	-16	-94	45	25	1	25	22	-17	4	-68	5	-6	44	4	-17	-9
202.55	42	32	-211	-249	21	4	156	-10	50	-10	-7	15	71	15	75	-13	-3	-13	-8	6	-6	5	-2	57	-3	-38	-16	-30	-17	-1	-49	1	2	-17	-94	45	26	1	26	27	-11	4	-67	4	-4	43	4	-16	-12
215.68	44	28	-228	-269	24	5	154	-10	52	-10	-8	17	76	15	80	-13	-2	-13	-8	6	-7	5	-1	57	-3	-38	-16	-33	-19	-1	-52	1	3	-19	-93	45	26	0	26	29	-13	4	-67	4	-4	44	5	-20	-10
229.39	45	25	-240	-281	26	7	155	-9	54	-10	-8	18	81	16	85	-14	-2	-13	-7	6	-7	5	-1	56	-3	-39	-17	-35	-19	-1	-54	-1	2	-20	-92	45	26	0	27	30	-10	4	-67	14	-5	42	5	-20	-11
235.98	45	24	-249	-288	27	8	155	-10	53	-10	-8	19	84	16	88	-14	-2	-13	-8	6	-7	6	0	56	-3	-39	-17	-36	-20	-2	-57	1	2	-20	-92	45	27	1	28	32	-8	5	-67	0	-5	41	5	-20	-11
249.59	46	24	-259	-298	28	9	155	-9	53	-10	-8	20	88	17	92	-15	-2	-13	-8	7	-7	6	1	56	-3	-38	-18	-38	-21	-2	-59	1	3	-22	-92	45	27	0	28	34	-8	5	-67	3	-4	43	5	-22	-9
269.95	48	24	-274	-313	31	11	156	-9	54	-10	-8	21	94	18	97	-15	-3	-13	-8	7	-8	6	2	55	-3	-39	-19	-41	-23	-2	-64	3	3	-23	-90	45	27	-1	29	37	-2	5	-67	14	-2	39	5	-24	-13
296.68	49	18	-296	-333	34	14	156	-10	56	-10	-9	24	102	19	105	-16	-2	-13	-9	9	-9	6	3	55	-3	-39	-20	-44	-25	-3	-69	6	3	-25	-90	45	27	-1	30	41	3	5	-67	2	-2	41	6	-26	-11
316.98	51	15	-312	-349	38	17	157	-10	56	-10	-9	25	110	21	111	-17	-2	-13	-8	9	-9	7	5	55	-3	-39	-22	-47	-26	-3	-73	5	4	-26	-89	45	27	-1	31	44	2	6	-66	14	-3	41	4	-26	-11
343.71	54	12	-330	-364	42	20	158	-9	55	-9	-9	27	118	22	118	-17	-2	-13	-8	10	-9	7	6	54	-3	-39	-23	-50	-27	-3	-78	8	4	-28	-90	45	28	-2	33	47	8	6	-65	2	-2	38	7	-30	-11
363.96	55	5	-348	-379	46	22	159	-10	57	-9	-9	29	127	22	125	-18	-2	-13	-9	11	-10	8	8	54	-3	-38	-24	-52	-29	-4	-82	9	6	-29	-88	45	28	-3	34	50	9	6	-64	5	-2	42	5	-31	-12
384.26	57	11	-364	-394	49	25	159	-9	56	-8	-10	31	135	24	132	-18	-3	-13	-8	11	-11	8	9	53	-3	-39	-26	-56	-30	-4	-87	9	6	-31	-88	45	28	-2	34	53	14	6	-65	8	3	39	8	-34	-11
418.34	57	3	-387	-410	54	29	160	-10	56	-8	-10	33	147	25	140	-20	-2	-14	-9	12	-11	8	12	53	-3	-39	-27	-60	-32	-4	-92	12	6	-33	-87	45	28	-3	35	57	20	6	-65	1	2	40	7	-34	-12
458.84	60	-5	-418	-435	60	34	161	-10	56	-8	-10	36	163	26	152	-21	-3	-14	-9	12	-13	9	15	52	-4	-39	-29	-65	-35	-5	-101	15	5	-36	-86	45	29	-5	36	63	30	6	-65	3	1	40	9	-38	-11
479.09	63	-7	-435	-448	65	38	162	-10	56	-7	-10	38	174	28	159	-21	-3	-14	-9	13	-13	9	17	51	-4	-39	-30	-68	-36	-5	-106	12	7	-37	-85	45	30	-5	38	66	31	7	-65	11	2	37	9	-23	-14
505.82	64	-16	-453	-463	69	41	162	-10	57	-7	-10	40	185	29	167	-22	-3	-14	-9	14	-14	10	19	51	-4	-39	-32	-71	-38	-5	-112	17	7	-38	-84	45	30	-5	39	70	34	7	-65	1	1	41	8	-41	-14
539.95	66	-17	-475	-480	74	45	163	-10	57	-7	-10	42	198	31	176	-23	-2	-15	-9	15	-15	10	22	50	-4	-39	-33	-76	-40	-6	-119	19	7	-41	-83	45	30	-6	40	75	41	7	-65	-1	3	39	9	-45	-14
573.91	70	-17	-499	-497	80	50	164	-10	58	-6	-10	45	213	32	187	-23	-2	-14	-9	16	-15	11	25	50	-4	-39	-34	-80	-42	-6	-125	20	8	-43	-82	45	31	-7	42	81	43	7	-65	12	6	38	11	-48	-14
614.47	72	-25	-524	-516	86	55	165	-10	59	-6	-10	48	227	34	199	-25	-2	-15	-9	17	-16	11	27	50	-5	-39	-36	-85	-44	-7	-132	22	8	-46	-81	45	31	-7	43	86	52	6	-65	-2	5	37	12	-51	-15
655.02	74	-31	-551	-538	93	61	167	-11	59	-5	-11	51	245	36	211	-26	-3	-16	-9	18	-18	12	30	49	-5	-39	-38	-90	-47	-7	-140	24	9	-50	-80	45	32	-8	45	92	58	6	-66	2	6	38	13	-56	-15
708.53	78	-35	-592	-567	101	69	168	-11	58	-4	-11	55	267	37	227	-28	-3	-15	-9	19	-19	13	34	48	-5	-39	-41	-97	-50	-8	-149	26	10	-53	-79	45	32	-9	47	99	63	5	-64	1	8	34	14	-62	-16
742.55	81	-42	-615	-585	108	74	170	-12	58	-4	-11	58	282	39	237	-28	-3	-16	-9	20	-20	13	37	47	-5	-39	-42	-101	-52	-8	-155	29	12	-55	-78	45	33	-10	48	103	75	5	-66	-1	7	32	13	-64	-16
776.63	84	-50	-638	-604	114	78	171	-12	58	-3	-11	61	296	40	248	-30	-3	-16	-9	20	-21	14	39	47	-5	-39	-44	-106	-54	-8	-162	30	11	-58	-76	45	34	-11	50	108	74	5	-65	0	7	36	13	-68	-15
803.3	86	-48	-658	-618	119	83	172	-12	59	-2	-12	63	309	41	257	-31	-3	-16	-9	21	-22	14	42	47	-5	-39	-45	-110	-56	-8	-168	34	12	-59	-77	44	34	-11	51	113	81	5	-66	0	10	35	15	-68	-15
837.38	88	-55	-682	-636	124	89	173	-13	59	-2	-12	66	325	42	269	-32	-2	-17	-9	22	-23	15	45	46	-6	-39	-47	-115	-57	-8	-174	35	14	-61	-76	44	35	-12	52	117	68	5	-65	-4	8	32	14	-73	-18
857.57	90	-56	-698	-647	129	93	173	-13	58	-2	-12	67	337	43	279	-33	-2	-17	-9	22	-23	15	47	46	-6	-39	-48	-119	-58	-8	-178	37	14	-62	-76	44	34	-12	53	119	88	4	-65	-2	11	33	16	-73	-16
877.88	91	-59	-712	-657	132	97	173	-13	59	-1	-12	68	350	44	289	-34	-2	-17	-8	23	-24	15	49	45	-5	-39	-48	-121	-59	-8	-181	36	14	-63	-74	44	35	-13	55	121	85	3	-64	-3	9	32	15	-76	-19
891	93	-60	-723	-666	136	100	174	-14	59	0	-12	69	362	44	298	-36	-2	-18	-9	23	-24	15	51	45	-6	-39	-49	-122	-60	-8	-183	38	15	-64	-73	44	35	-13	55	123	89	2	-64	3	11	32	16	-76	-16
904.61	93	-62	-735	-675	140	105	175	-14	58	1	-12	70	372	45	310	-39	-2	-17	-8	23	-24	15	53	45	-6	-39	-49	-124	-61	-8	-186	38	15	-65	-73	44	35	-13	57	124	100	2	-65	-3	9	31	16	-80	-17
911.2	92	-62	-741	-680	142	106	175	-14	58	1	-12	71	378	45	318	-40	-2	-17	-8	23	-25	16	54	45	-6	-39	-49	-125	-61	-8	-186	41	15	-65	-74	44	35	-13	54	125	91	2	-65	-2	11	34	18	-78	-12
911.2	92	-57	-742	-681	142	108	175	-14	59	1	-12	71	381	45	322	-41	-2	-17	-8	23	-25	16	55	45	-6	-39	-49	-125	-61	-7	-187	40	15	-65	-75	43	35	-14	54	125	94	1	-67	-2	13	35	17	-77	-16
890.95	88	-59	-751	-699	263	227	244	-16	80	0	-8	69	394	46	338	-47	-3	-23	-10	22	-27	14	55	45	-8	-44	-49	-126	-60	-6	-188	37	16	-66	-72	50	35	34	66	129	113	12	-35	-7	11	31	16	-68	-16
890.95	88	-56	-750	-699	270	227	245	-16	80	0	-8	69	394	46	338	-47	-3	-22	-9	22	-27	14	55	45	-8	-44	-49	-127	-60	-6	-188	36	15	-65	-73	50	36	34	65	129	112	13	-40	-6	12	28	15	-66	-16
850.28	89	-52	-749	-698	269	227	244	-15	83	0	-8	69	393	45	337	-48	-3	-23	-9	22	-26	14	55	46	-8	-44	-49	-126	-59	-6	-187	35	15	-65	-73	50	36	35	65	128	112	12	-39	-5	10	30	15	-68	-15
769.28	87	-54	-742	-692	266	225	242	-16	83	0	-8	67	385	45	331	-46	-3	-22	-10	21	-26	13	52	46	-8	-44	-47	-121	-57	-6	-179	34	14	-62	-75	50	35	36	63	120	105	13	-40	-4	12	29	17	-67	-15
627.37	81	-41	-682	-642	248	211	239	-14	83	-2	-7	59	339	40	295	-42	-2	-21	-10	19	-23	11	44	48	-7	-44	-42	-103	-50	-5	-156	26	11	-54	-78	50	33	39	57	101	85	14	-42	10	9	29	15	-55	-13
485.41	70	-30	-601	-577	222	191	235	-13	84	-4	-6	48	279	35	252	-37	-2	-20	-9	16	-19	9	33	50	-7	-45	-35	-86	-42	-4	-131	20	7	-43	-82	49	31	41	51	83	64	18	-44	-1	7	35	11	-45	-13
384.16	62	-11	-515	-508	195	172	230	-12	84	-7	-6	39	221	30	212	-32	-2	-19	-10	13	-15	7	23	52	-6	-45	-30	-71	-35	-3	-108	14	5	-36	-85	50	29	44	47	66	45	17	-46	11	3	36	8	-34	-14
283.61	54	-1	-438	-448	174	154	226	-11	84	-8	-6	31	174	25	175	-27	-2	-18	-9	10	-13	6	13	54	-5	-45	-25	-57	-29	-2	-87	10	3	-29	-87	50	27	46	43	51	30	16	-45	13	-1	38	6	-25	-11
202.39	47	18	-360	-385	155	140	222	-11	84	-9	-4	24	134	21	144	-24	-2	-18	-9	7	-10	5	6	55	-5	-45	-20	-47	-23	-2	-70	3	2	-24	-90	49	27	47	38	40	19	13	-47	-1	0	37	5	-19	-11
107.62	39	28	-286	-318	143	129	219	-12	83	-11	-4	17	101	17	115	-20	-2	-18	-9	4	-9	3	0	57	-5	-45	-16	-35	-18	0	-53	-3	0	-19	-93	49	25	49	34	28	6	11	-47	13	-3	40	4	-10	-12
40.28	35	31	-221	-257	136	120	217	-11	83	-11	-3	12	79	14	94	-18	-3	-17	-8	2	-8	1	-3	58	-5	-44	-13	-28	-14	0	-42	-6	0	-14	-96	48	25	50	31	20	-3	10	-49	13	-7	40	1	-6	-10
6.32	30	37	-171	-196	130	114	215	-12	84	-11	-3	8	62	11	79	-16	-3	-18	-8	1	-7	0	-6	58	-6	-44	-11	-24	-12	1	-33	-6	-1	-12	-97	48	24	50	29	15	-9	10	-50	1	-7	40	2	-1	-11
-0.27	27	39	-127	-138	124	109	212	-12	82	-12	-2	5	51	9	67	-15	-4	-18	-8	-1	-7	-2	-8	59	-6	-44	-9	-20	-10	1	-27	-10	0	-10	-98	48	24	50	28	10	-11	10	-50	4	-10	40	3	-1	-8
26.62	25	44	-94	-102	113	106	211	-12	79	-12	-2	3	42	7	59	-13	-4	-18	-8	-2	-6	-2	-9	59	-6	-42	-9	-16	-9	1	-22	-11	-1	-9	-99	47	23	50	27	8	-17	10	-49	3	-9	42	1	2	-8
26.62	25	41	-92	-100	120	105	210	-12	78	-14	-2	3	41	7	58	-13	-4	-18	-8	-2	-6	-2	-9	59	-6	-42	-8	-15	-9	1	-22	-12	-2	-8	-99	47	23	49	27	7	-16	9	-48	4	-10	41	1	4	-9
33.21	24	44	-91	-99	119	105	210	-12	78	-14	-2	2	41	7	58	-13	-4	-17	-8	-2	-6	-2	-9	60	-6	-42	-8	-15	-9	1	-22	-10	-1	-8	-99	48	23	49	28	7	-12	9	-48	3	-11	42	0	6	-10
40.39	24	42	-91	-99	120	104	210	-12	81	-12	-2	3	41	7	58	-13	-4	-18	-8	-1	-6	-2	-9	59	-6	-41	-8	-15	-9	1	-22	-11	-1	-8	-99	48	23	49	27	7	-15	9	-49	6	-11	43	1	2	-6
40.39	24	45	-91	-99	114	104	210	-12	81	-14	-2	2	41	6	58	-14	-4	-18	-7	-2	-6	-2	-9	60	-6	-41	-8	-15	-9	1	-22	-9	-1	-8	-99	48	23	49	27	7	-15	9	-49	6	-9	43	0	5	-7
40.39	24	42	-91	-99	110	104	209	-12	81	-14	-2	3	41	7	58	-13	-4	-18	-7	-1	-5	-2	-9	59	-5	-41	-8	-15	-9	1	-22	-10	-2	-8	-100	47	23	49	27	7	-14	9	-49	5	-10	42	2	3	-7
46.98	25	44	-91	-99	115	104	209	-12	81	-14	-2	3	41	7	58	-13	-4	-17	-7	-2	-5	0	-9	60	-5	-41	-8	-15	-9	1	-23	-10	-1	-8	-100	48	23	49	26	7	-11	9	-49	4	-10	43	0	4	-10
53.51	25	47	-92	-100	107	104	210	-12	82	-12	-2	3	41	7	59	-13	-4	-17	-7	-2	-6	-2	-9	60	-5	-41	-3	-16	-9	1	-23	-9	0	-8	-100	47	23	49	26	7	-10	9	-51	4	-8	42	1	3	-8
60.7	25	46	-96	-103	107	105	210	-12	81	-14	-2	3	42	7	59	-13	-4	-17	-7	-1	-6	-2	-9	60	-5	-41	-9	-16	-9	1	-24	-11	-1	-8	-100	47	24	48	26	8	-9	9	-50	5	-7	42	2	4	-8
67.18	26	42	-100	-107	111	105	210	-12	80	-14	-2	4	43	8	61	-13	-4	-17	-7	-1	-5	0	-8	60	-5	-40	-9	-18	-9	1	-24	-9	-1	-8	-99	47	24	48	27	9	-7	9	-51	7	-10	41	3	4	-8
73.76	25	41	-105	-113	111	105	210	-12	80	-14	-3	4	45	8	63	-14	-4	-17	-7	0	-5	0	-8	60	-5	-41	-10	-19	-10	1	-26	-9	-2	-9	-98	47	23	48	28	10	-8	9	-52	6	-9	41	2	0	-7
94.01	26	40	-115	-125	114	106	210	-12	82	-14	-2	5	48	9	65	-14	-4	-17	-7	0	-5	0	-7	59	-5	-40	-10	-20	-11	1	-28	-6	-1	-10	-99	47	24	48	28	12	-5	10	-52	6	-8	41	1	2	-8
107.73	28	39	-126	-142	120	107	210	-12	82	-14	-2	6	51	10	68	-15	-3	-17	-7	1	-6	1	-7	59	-5	-40	-10	-21	-11	1	-31	-6	-1	-10	-98	48	24	48	28	14	-3	10	-51	13	-7	42	3	1	-9
128.09	29	34	-143	-167	117	109	211	-12	82	-12	-3	8	56	11	74	-15	-3	-17	-7	2	-6	2	-6	59	-4	-40	-12	-24	-13	1	-35	-4	0	-12	-98	48	25	48	28	18	-1	10	-49	5	-9	40	4	0	-10
141.8	31	36	-163	-198	111	111	212	-12	83	-14	-3	10	61	12	80	-17	-3	-16	-8	3	-6	3	-5	59	-4	-40	-13	-27	-14	0	-40	-5	0	-14	-96	49	25	48	30	21	-4	11	-47	5	-5	42	4	-2	-7
175.12	33	32	-193	-235	116	114	213	-12	83	-12	-4	12	69	14	89	-17	-3	-16	-8	4	-7	4	-3	58	-4	-40	-14	-31	-16	0	-47	-5	0	-16	-95	49	26	47	31	26	9	12	-48	5	-6	41	4	-4	-12
195.43	34	30	-215	-260	121	116	214	-12	83	-12	-4	14	77	15	96	-18	-3	-16	-8	5	-7	4	-2	58	-3	-40	-17	-34	-18	-1	-51	-2	1	-17	-94	49	26	47	33	30	13	13	-48	6	-5	43	2	-4	-9
229.39	38	28	-246	-294	122	120	215	-11	84	-12	-5	18	89	17	108	-20	-3	-16	-8	7	-8	5	1	57	-3	-40	-18	-40	-20	-2	-60	1	1	-20	-92	49	27	46	34	36	19	13	-46	6	-3	40	6	-10	-10
263.47	43	22	-277	-324	124	125	217	-11	84	-11	-6	21	99	19	117	-21	-3	-16	-9	8	-8	5	2	57	-3	-40	-20	-44	-22	-3	-66	4	3	-23	-91	49	27	46	36	40	15	13	-47	4	-3	40	6	-11	-10
290.25	43	19	-302	-349	129	128	217	-11	86	-12	-6	23	110	20	127	-22	-3	-16	-9	9	-9	6	4	56	-4	-40	-22	-47	-25	-3	-72	6	2	-25	-91	49	28	45	37	45	32	14	-47	6	-2	39	5	-16	-10
330.8	47	14	-337	-380	141	134	218	-11	85	-11	-6	25	126	22	141	-23	-3	-16	-9	10	-10	7	7	55	-3	-40	-25	-54	-27	-3	-81	8	3	-28	-89	49	29	44	38	51	40	14	-48	3	-2	38	6	-20	-10
371.25	50	9	-368	-407	144	139	220	-11	85	-10	-6	29	142	24	154	-25	-3	-16	-9	11	-11	8	10	55	-3	-40	-26	-59	-30	-4	-89	10	3	-30	-88	50	29	42	40	57	43	15	-45	3	0	37	8	-22	-10
417.26	53	3	-400	-432	145	146	221	-11	87	-10	-7	33	160	26	168	-26	-3	-16	-9	12	-11	8	14	54	-4	-40	-29	-64	-33	-4	-97	11	5	-33	-86	50	30	42	42	63	52	16	-45	12	2	37	9	-25	-11
465.37	56	-7	-438	-463	149	154	223	-11	86	-9	-7	36	183	29	186	-28	-3	-17	-9	13	-13	9	19	53	-4	-40	-30	-71	-36	-4	-108	13	5	-36	-85	49	31	41	44	71	49	16	-44	2	2	37	9	-30	-11
505.87	60	-8	-466	-484	156	159	224	-12	88	-8	-7	39	200	30	199	-30	-3	-17	-9	15	-14	10	23	53	-4	-40	-32	-75	-38	-5	-116	17	5	-38	-84	50	32	40	46	76	63	17	-45	0	5	38	11	-30	-12
546.43	62	-13	-495	-506	165	166	226	-12	87	-8	-7	42	221	32	214	-32	-3	-17	-9	16	-15	10	26	52	-4	-40	-35	-81	-41	-6	-124	20	7	-42	-82	49	32	39	48	82	76	16	-43	2	6	34	9	-36	-11
600.7	65	-24	-535	-537	175	175	228	-13	86	-7	-8	46	247	34	233	-35	-3	-18	-9	17	-16	11	31	51	-5	-40	-37	-89	-44	-6	-136	25	6	-45	-80	49	33	37	51	90	78	15	-44	3	5	39	10	-39	-14
655.07	70	-34	-573	-564	186	184	229	-13	87	-6	-8	51	273	36	252	-37	-3	-18	-8	18	-18	12	35	50	-5	-40	-39	-95	-47	-6	-145	25	8	-50	-78	49	33	36	52	97	85	13	-41	10	5	33	12	-46	-14
695.57	71	-40	-603	-586	195	191	230	-14	87	-5	-8	53	293	38	265	-39	-3	-18	-8	19	-20	13	39	49	-5	-40	-41	-100	-49	-6	-153	30	9	-52	-77	49	34	35	55	102	90	12	-41	-1	7	33	14	-49	-14
742.55	75	-41	-634	-610	202	198	232	-14	87	-4	-8	57	315	40	281	-41	-3	-18	-9	20	-20	13	43	49	-5	-40	-43	-107	-51	-6	-161	32	11	-55	-77	50	35	35	56	108	105	11	-41	-1	9	32	15	-53	-15
789.64	78	-47	-667	-635	208	206	233	-15	88	-3	-8	61	338	41	298	-43	-3	-19	-9	21	-22	14	47	48	-6	-40	-45	-113	-55	-6	-171	33	12	-58	-76	49	35	33	58	116	112	11	-42	14	9	32	15	-59	-12
837.43	82	-49	-698	-658	214	213	235	-15	88	-2	-9	64	362	43	317	-45	-2	-19	-8	22	-23	15	52	48	-5	-40	-48	-120	-57	-6	-180	37	13	-61	-74	49	36	33	61	123	120	10	-41	-2	13	31	17	-62	-13
884.47	85	-57	-730	-682	223	220	237	-15	88	-1	-9	67	384	45	333	-48	-3	-19	-8	24	-24	15	56	47	-6	-39	-49	-126	-60	-7	-187	39	15	-64	-73	49	37	31	62	128	127	9	-42	2	12	32	19	-67	-15
924.86	88	-61	-760	-704	235	228	238	-16	87	-1	-10	70	408	47	348	-50	-2	-19	-8	24	-25	16	60	47	-6	-39	-51	-131	-62	-6	-195	43	15	-66	-72	49	38	31	64	133	137	9	-41	4	13	29	18	-71	-15
958.99	90	-64	-783	-722	245	234	239	-12	87	1	-10	73	427	48	362	-54	-2	-21	-8	25	-26	17	64	46	-6	-39	-52	-135	-63	-6	-201	42	15	-68	-71	49	38	30	65	137	134	8	-45	-1	13	32	19	-74	-13
979.24	92	-66	-800	-733	248	240	240	-17	88	2	-10	74	443	49	374	-55	-3	-21	-8	25	-27	17	67	46	-7	-40	-53	-138	-65	-7	-204	43	16	-68	-71	49	38	30	66	139	143	7	-46	-2	14	28	19	-75	-17
999.49	92	-72	-813	-744	251	244	240	-18	88	2	-10	75	459	49	385	-58	-3	-22	-8	25	-27	17	70	46	-6	-40	-53	-140	-67	-6	-207	45	16	-69	-71	49	38	29	66	140	143	7	-45	0	12	28	18	-78	-16
1006.02	92	-72	-822	-751	257	248	240	-18	86	3	-10	76	469	49	393	-59	-3	-22	-7	25	-28	17	72	46	-7	-40	-54	-141	-67	-6	-209	46	16	-70	-71	49	38	29	67	141	140	6	-42	0	13	29	18	-77	-16
1012.45	92	-75	-828	-755	258	250	239	-18	87	2	-10	75	476	49	400	-60	-3	-22	-7	25	-28	17	74	45	-7	-39	-54	-142	-67	-6	-211	45	17	-70	-70	49	38	28	67	142	145	6	-43	4	12	27	18	-80	-17
1012.45	92	-73	-830	-757	255	251	240	-19	88	3	-10	76	478	49	405	-61	-3	-22	-7	25	-28	17	75	46	-7	-40	-54	-142	-67	-6	-211	46	18	-70	-70	49	38	29	67	142	148	6	-43	-1	13	29	21	-78	-16
1012.39	91	-77	-855	-771	263	261	178	-19	73	4	-10	77	498	51	447	-60	-2	-24	-9	24	-30	15	79	44	-9	-42	-52	-142	-67	-3	-213	42	20	-72	-72	47	36	27	64	142	155	3	-20	-7	14	27	18	-81	-17
1005.97	90	-80	-856	-772	252	261	176	-19	74	4	-10	77	498	51	447	-60	-2	-23	-8	24	-30	15	79	44	-9	-42	-53	-143	-67	-3	-213	43	19	-71	-72	47	36	26	65	142	157	3	-24	-4	13	29	18	-82	-17
870.59	90	-75	-848	-764	251	259	176	-19	75	4	-10	75	489	50	439	-59	-2	-23	-9	23	-29	15	76	44	-9	-42	-51	-138	-64	-3	-206	40	19	-69	-72	46	35	27	63	135	145	3	-26	-2	13	29	18	-81	-16
816.97	86	-70	-821	-742	243	251	173	-18	75	3	-9	71	466	48	423	-57	-1	-23	-8	22	-28	14	72	45	-9	-43	-49	-131	-61	-3	-197	39	18	-65	-74	46	35	28	61	128	133	4	-28	9	13	29	18	-76	-15
743.31	81	-65	-780	-710	233	240	171	-17	77	1	-9	66	432	45	398	-54	-1	-22	-9	21	-26	13	65	46	-8	-44	-46	-122	-57	-2	-184	36	15	-62	-76	47	34	29	57	119	129	4	-28	-1	8	30	13	-70	-14
667.87	76	-56	-732	-672	225	227	167	-16	77	-1	-9	60	392	42	369	-50	-1	-21	-9	19	-24	12	58	47	-8	-44	-42	-111	-52	-3	-170	32	13	-56	-79	46	32	31	54	107	113	5	-29	-1	7	29	12	-60	-14
594.05	71	-48	-682	-634	208	214	164	-15	78	-3	-8	55	355	39	342	-46	-1	-21	-9	18	-22	11	51	48	-7	-44	-39	-101	-48	-3	-156	26	10	-52	-81	46	31	32	50	97	104	5	-29	2	5	31	12	-56	-15
525.96	67	-38	-636	-597	194	202	162	-15	79	-4	-8	49	316	37	315	-42	-1	-19	-9	16	-20	10	43	49	-7	-44	-36	-91	-44	-2	-142	24	9	-45	-82	46	31	34	48	87	89	6	-31	7	3	34	11	-49	-13
458.68	61	-27	-587	-558	183	189	159	-14	80	-6	-8	44	278	34	285	-39	-1	-18	-9	14	-18	9	35	51	-6	-44	-32	-81	-40	-2	-127	19	7	-41	-86	46	29	35	44	75	78	6	-31	-1	4	32	9	-44	-11
355.64	54	-10	-517	-502	163	171	155	-13	85	-8	-8	36	225	29	244	-33	-1	-18	-9	11	-15	8	24	52	-6	-45	-27	-67	-33	-1	-104	12	4	-34	-88	47	27	38	39	59	61	6	-31	3	1	35	8	-33	-14
235.76	47	2	-427	-429	139	150	152	-12	85	-9	-7	27	169	23	199	-27	-1	-17	-9	9	-12	5	13	54	-5	-45	-22	-53	-28	-1	-82	4	3	-27	-92	46	26	39	34	44	41	5	-35	5	-3	39	2	-20	-13
148.23	39	12	-342	-360	122	135	148	-12	82	-11	-6	20	128	19	162	-23	-2	-17	-9	6	-9	4	5	55	-5	-45	-18	-41	-20	0	-63	0	1	-20	-95	46	25	41	30	30	29	4	-36	11	-6	39	3	-21	-8
53.35	30	25	-246	-271	106	121	144	-13	83	-12	-5	13	93	15	128	-19	-3	-16	-9	2	-8	2	-1	57	-6	-44	-12	-30	-15	1	-46	-3	1	-15	-97	45	23	42	27	19	16	3	-38	5	-6	40	1	-9	-11
12.8	26	26	-192	-204	98	114	142	-13	83	-14	-3	7	75	12	109	-17	-3	-17	-8	0	-7	-2	-4	58	-5	-44	-11	-24	-13	2	-37	-5	-1	-12	-100	45	23	42	25	13	9	2	-38	4	-4	39	-1	-9	-6
-0.27	24	69	-150	-151	93	110	141	-13	82	-14	-4	6	63	9	98	-15	-3	-16	-8	-1	-7	-2	-6	58	-6	-43	-10	-21	-11	2	-30	-8	-2	-10	-101	44	22	42	23	9	9	2	-38	5	52	40	1	-4	-9
-0.16	18	38	-81	-88	82	104	137	-13	77	-15	-4	0	41	4	77	-14	-6	-17	-8	-3	-6	-4	-9	58	-7	-42	-8	-14	-9	2	-19	-13	-2	-7	-104	43	20	42	19	1	-1	0	-36	5	-10	41	-1	3	-7
12.91	19	36	-78	-85	88	103	137	-13	75	-15	-4	0	40	4	76	-14	-6	-17	-8	-3	-6	-3	-10	59	-7	-42	-8	-14	-8	2	-19	-12	-3	-7	-105	44	20	42	19	1	-7	-1	-40	4	-11	42	0	2	-7
12.91	18	37	-77	-85	91	103	136	-14	77	-16	-4	0	40	4	76	-13	-6	-17	-8	-3	-6	-3	-9	58	-7	-42	-8	-14	-8	2	-18	-11	-3	-7	-104	44	21	42	20	1	-1	0	-39	6	-11	40	1	2	-7
12.91	18	37	-75	-83	94	102	136	-14	78	-16	-4	-1	40	4	75	-13	-5	-16	-7	-3	-6	-3	-10	59	-6	-42	-7	-13	-8	2	-18	-12	-2	-7	-105	44	21	41	19	1	-5	-1	-36	6	-11	42	1	2	-6
20.09	18	-117	-75	-83	96	102	136	-13	80	-16	-4	-1	40	4	75	-14	-6	-16	-7	-3	-6	-3	-10	59	-7	-41	-8	-13	-8	2	-18	-12	-2	-7	-104	44	21	41	19	1	5	-1	-37	3	-61	41	1	3	-7
26.68	18	130	-77	-84	96	102	135	-14	79	-16	-4	0	40	5	76	-13	-5	-16	-7	-3	-6	-3	-9	59	-6	-41	-8	-14	-8	2	-19	-11	-2	-7	-104	44	22	41	18	2	7	-1	-39	4	-11	43	-2	4	-8
33.26	18	37	-79	-85	97	102	135	-13	80	-16	-4	0	41	4	77	-14	-5	-16	-8	-3	-6	-3	-9	59	-6	-41	-8	-14	-8	2	-19	-12	-2	-7	-104	44	21	41	20	2	0	-1	-39	7	-8	42	2	4	-6
40.39	19	35	-82	-87	97	103	135	-13	81	-16	-4	0	41	5	77	-14	-5	-16	-7	-2	-6	-3	-9	59	-6	-41	-8	-15	-9	2	-21	-12	-1	-8	-104	44	21	41	19	3	2	-1	-40	11	-10	41	1	2	-7
46.98	19	35	-86	-89	97	103	135	-13	81	-16	-4	1	43	5	78	-14	-5	-16	-7	-3	-6	-3	-9	59	-6	-41	-8	-15	-9	1	-22	-10	-2	-7	-104	44	21	41	19	4	3	-1	-41	5	-10	40	1	2	-7
53.51	20	33	-91	-91	98	103	135	-14	83	-16	-4	1	44	6	79	-14	-5	-16	-7	-2	-6	-2	-9	58	-6	-41	-9	-16	-10	1	-23	-11	-2	-8	-104	44	21	41	20	4	8	-2	-40	5	-11	41	0	1	-8
60.75	20	35	-98	-95	97	103	135	-14	84	-16	-5	2	46	6	82	-14	-5	-16	-8	-2	-6	-3	-8	58	-6	-41	-9	-16	-10	1	-24	-11	-2	-8	-102	44	21	40	21	5	4	-2	-40	5	-8	40	2	-2	-8
67.23	21	35	-105	-100	97	104	136	-13	83	-15	-5	3	48	7	84	-15	-5	-16	-8	-1	-6	-2	-8	58	-6	-41	-9	-18	-10	1	-25	-10	-2	-9	-104	44	21	40	20	6	9	-2	-41	5	-8	41	0	2	-9
73.76	22	32	-114	-109	96	104	135	-13	83	-16	-5	3	50	7	86	-15	-5	-16	-8	-1	-6	-2	-8	58	-6	-41	-10	-20	-11	1	-27	-10	-1	-9	-102	44	22	40	20	7	12	-2	-41	5	-10	40	4	-3	-8
81.05	22	32	-124	-120	95	105	136	-13	85	-15	-5	4	53	8	88	-15	-5	-16	-8	-1	-6	-2	-7	58	-6	-41	-10	-21	-11	1	-30	-8	-1	-10	-101	44	22	40	22	9	-1	-2	-41	4	-8	41	0	0	-7
87.48	24	34	-132	-133	96	106	137	-13	85	-16	-5	5	55	8	91	-16	-5	-15	-8	-1	-6	-2	-7	58	-6	-41	-10	-22	-12	0	-31	-9	-1	-11	-101	44	22	40	22	10	9	-1	-41	5	-6	39	2	-4	-8
107.78	25	30	-147	-154	98	107	137	-13	85	-16	-5	6	59	10	95	-16	-5	-16	-8	0	-7	0	-6	57	-6	-41	-12	-24	-13	0	-35	-5	1	-13	-102	44	22	40	22	13	10	-1	-40	6	-8	39	2	-5	-8
121.55	26	26	-161	-175	100	109	137	-13	86	-15	-6	7	63	10	99	-17	-5	-15	-8	1	-7	0	-6	57	-5	-41	-12	-26	-14	0	-38	-5	-2	-13	-100	44	22	40	23	15	6	-1	-38	5	-7	41	4	-5	-5
141.86	27	25	-179	-204	106	110	138	-12	86	-15	-7	9	68	13	104	-18	-4	-15	-9	1	-7	1	-5	56	-5	-41	-13	-29	-16	-1	-43	-4	11	-15	-99	44	23	39	25	19	13	-1	-38	4	-6	40	2	-7	33
168.64	30	19	-203	-233	106	113	138	-12	88	-15	-6	11	76	13	112	-19	-4	-15	-9	3	-7	2	-3	56	-5	-41	-14	-32	-17	0	-48	-4	0	-16	-98	45	23	39	25	23	14	0	-38	4	-6	41	3	-8	-9
202.61	31	108	-233	-270	110	116	140	-13	89	-15	-7	14	85	15	122	-20	-4	-14	-9	4	-8	3	-1	55	-5	-41	-17	-36	-19	-1	-55	-1	1	-19	-97	45	24	38	27	28	22	1	-37	-13	33	40	2	-10	-8
235.98	35	16	-272	-310	115	121	141	-13	90	-15	-8	17	99	17	135	-22	-4	-15	-9	6	-9	4	1	54	-5	-41	-20	-43	-23	-2	-65	1	0	-23	-95	45	25	37	29	35	32	1	-38	7	-4	38	8	-14	-11
276.48	38	11	-306	-344	122	127	143	-12	91	-14	-8	20	112	19	147	-23	-4	-15	-9	7	-10	4	3	54	-5	-41	-22	-47	-25	-3	-72	4	0	-26	-94	45	25	37	30	41	44	2	-37	6	-3	38	5	-17	-9
310.5	42	6	-339	-373	125	132	143	-12	91	-14	-9	24	125	20	159	-24	-4	-15	-10	8	-11	5	6	53	-4	-41	-23	-52	-27	-3	-79	5	1	-27	-93	45	26	36	32	46	48	2	-38	5	-3	39	7	-20	-10
343.71	45	7	-367	-399	129	137	144	-12	93	-12	-9	27	140	22	172	-26	-3	-14	-10	10	-12	6	9	53	-5	-41	-25	-57	-29	-3	-87	9	2	-30	-92	46	26	35	33	51	56	3	-37	13	2	37	6	-21	-10
391.55	48	-5	-405	-429	136	144	146	-12	93	-12	-9	30	159	24	188	-27	-4	-15	-10	10	-13	7	13	52	-5	-41	-27	-62	-32	-3	-95	12	3	-33	-90	46	27	35	35	57	62	5	-37	1	-1	37	5	-25	-9
432.05	51	-6	-436	-455	143	150	147	-13	92	-11	-10	33	179	26	205	-30	-4	-14	-10	12	-14	7	18	51	-5	-41	-29	-68	-34	-4	-105	13	4	-35	-89	45	28	33	38	63	72	5	-37	4	4	34	8	-29	-11
485.51	54	-16	-475	-486	152	159	148	-13	92	-10	-10	37	203	29	224	-33	-4	-15	-10	13	-15	8	22	51	-5	-41	-32	-74	-38	-4	-115	16	4	-38	-87	46	29	33	39	69	81	6	-36	4	3	37	10	-33	-11
513.16	56	-22	-500	-505	160	165	149	-14	94	-9	-10	39	221	30	238	-35	-4	-15	-10	13	-16	9	26	50	-6	-41	-33	-79	-40	-4	-123	19	5	-41	-87	45	29	31	41	75	86	6	-36	8	4	35	10	-38	-11
573.91	60	-32	-540	-536	172	176	151	-14	93	-8	-11	43	251	32	262	-38	-3	-16	-10	15	-18	10	32	50	-6	-41	-36	-86	-43	-4	-134	22	7	-44	-85	45	30	30	43	84	90	5	-36	1	4	34	9	-40	-11
641.25	64	-36	-589	-570	187	188	153	-15	93	-7	-11	48	288	35	288	-42	-4	-16	-10	17	-20	10	38	48	-7	-41	-38	-94	-47	-5	-145	24	8	-50	-83	45	30	29	46	92	104	5	-35	-1	6	33	11	-48	-13
695.57	67	-45	-626	-598	199	198	154	-15	93	-6	-11	52	317	38	311	-45	-3	-17	-10	18	-22	11	44	47	-7	-41	-41	-102	-50	-5	-157	29	9	-54	-81	45	31	28	49	100	111	4	-35	2	7	31	12	-52	-14
756.32	71	-53	-670	-631	213	209	156	-16	94	-4	-12	56	353	40	338	-48	-3	-18	-9	19	-23	12	51	46	-7	-41	-44	-112	-54	-5	-170	33	11	-57	-80	45	32	26	52	109	120	3	-34	6	8	31	13	-57	-12
817.24	75	-59	-714	-663	227	221	158	-17	94	-2	-11	61	389	42	365	-53	-3	-18	-9	20	-26	13	58	45	-8	-41	-46	-121	-57	-5	-182	36	13	-62	-78	45	33	25	54	118	129	3	-35	2	10	30	16	-62	-13
884.47	79	-70	-760	-697	239	232	159	-18	94	-1	-13	65	423	44	391	-57	-3	-19	-9	21	-27	13	65	45	-8	-41	-49	-129	-60	-5	-193	41	13	-65	-77	45	34	24	56	126	138	2	-33	7	10	29	14	-70	-16
945.11	83	-79	-802	-729	250	244	161	-19	94	0	-13	70	458	47	418	-60	-3	-19	-9	23	-29	14	71	44	-9	-41	-52	-137	-64	-5	-204	44	14	-69	-75	45	35	22	59	134	147	1	-32	-1	10	29	17	-77	-14
999.49	88	-86	-838	-756	262	255	163	-19	94	2	-13	74	491	49	444	-63	-3	-21	-8	24	-30	15	79	43	-9	-41	-54	-145	-68	-5	-216	49	17	-72	-73	45	36	21	62	142	155	0	-32	9	11	27	17	-81	-15
1059.53	90	-90	-875	-782	275	266	164	-21	94	3	-13	77	525	50	475	-67	-3	-21	-8	24	-32	16	85	42	-9	-41	-55	-150	-70	-5	-223	52	17	-74	-73	45	36	20	63	146	164	-2	-34	-4	14	27	18	-84	-16
1079.84	93	-88	-897	-799	283	277	165	-21	92	5	-14	79	554	52	510	-69	-2	-22	-8	24	-33	16	92	42	-9	-41	-56	-154	-72	-4	-229	51	20	-76	-72	44	36	20	63	150	168	-3	-34	-3	15	27	19	-87	-15
1107.27	93	-97	-917	-812	289	287	165	-22	93	5	-14	80	568	52	556	-72	-3	-23	-8	24	-35	16	98	42	-10	-41	-57	-157	-73	-4	-233	51	20	-77	-73	45	36	21	63	150	167	-6	-34	-4	12	26	19	-90	-19
1107.27	94	-89	-922	-815	289	290	165	-23	93	5	-14	80	573	53	576	-72	-3	-23	-8	24	-35	16	100	42	-10	-41	-57	-158	-73	-4	-235	49	19	-77	-73	44	36	22	63	151	167	-6	-37	-4	17	27	18	-89	-16
1113.8	94	-94	-929	-821	290	294	166	-23	92	5	-14	80	582	53	595	-73	-3	-23	-8	25	-36	16	103	42	-10	-41	-57	-159	-74	-3	-237	51	20	-78	-72	44	37	23	64	151	168	-7	-40	0	15	28	20	-90	-16
1107.22	95	-97	-957	-845	289	303	179	-23	78	6	-14	82	604	55	651	-73	-2	-18	-8	24	-37	16	110	41	-11	-43	-55	-158	-73	0	-238	49	24	-77	-72	43	36	24	67	154	177	46	-35	-5	14	27	19	-91	-13
1107.16	96	-94	-957	-845	290	303	180	-22	80	6	-14	82	604	55	651	-73	-2	-18	-8	24	-37	17	110	42	-11	-43	-55	-159	-73	0	-238	49	25	-78	-72	43	36	24	69	154	176	46	-38	-2	16	27	20	-91	-13
1107.22	96	-96	-957	-845	290	303	179	-23	81	6	-14	82	604	55	651	-72	-2	-18	-8	24	-37	16	110	42	-11	-44	-55	-158	-73	-1	-238	48	26	-78	-72	43	36	26	68	153	174	46	-38	-3	14	24	21	-90	-12
992.09	96	-96	-952	-840	290	301	179	-23	82	6	-14	81	598	54	647	-72	-2	-18	-8	24	-36	16	109	42	-11	-44	-55	-156	-72	-1	-235	48	24	-76	-73	43	36	26	67	150	169	46	-38	0	12	27	21	-91	-13
837.27	88	-76	-892	-792	269	282	175	-21	83	3	-14	72	536	50	593	-66	-2	-16	-8	21	-32	14	95	44	-10	-44	-48	-138	-63	0	-208	42	22	-68	-77	43	34	28	60	130	148	49	-39	-1	12	27	18	-80	-14
715.55	80	-63	-821	-737	242	258	171	-19	84	1	-13	64	469	46	535	-59	-2	-15	-8	19	-29	12	81	46	-9	-44	-43	-121	-56	0	-185	35	16	-60	-80	43	32	30	55	114	133	52	-41	2	12	29	16	-69	-13
594.05	72	-47	-743	-677	214	233	167	-17	86	-2	-12	56	397	41	470	-51	-1	-13	-9	17	-24	11	64	48	-8	-44	-38	-103	-49	0	-160	27	13	-52	-83	43	30	33	49	96	116	54	-42	8	10	31	14	-57	-11
465.21	65	-35	-653	-605	182	206	163	-15	87	-5	-11	46	317	37	396	-43	-1	-12	-9	15	-19	9	47	50	-7	-45	-32	-84	-41	0	-132	20	9	-41	-86	44	28	35	43	77	91	56	-45	1	5	33	11	-46	-13
330.59	54	-12	-543	-519	149	176	158	-13	89	-8	-10	36	237	31	320	-34	-1	-10	-9	11	-15	7	30	52	-5	-45	-25	-65	-32	1	-102	12	5	-32	-92	44	26	37	37	56	71	55	-44	3	2	37	6	-33	-11
148.18	42	12	-403	-406	115	144	152	-12	89	-10	-8	24	156	23	236	-25	-2	-10	-8	7	-10	5	13	55	-5	-45	-17	-44	-22	1	-68	1	4	-22	-96	43	24	39	30	34	42	53	-46	7	-2	38	7	-21	-8
12.74	31	26	-266	-282	92	124	147	-12	89	-12	-6	14	105	17	179	-19	-4	-9	-8	3	-7	3	3	57	-5	-44	-12	-29	-15	4	-45	-3	1	-14	-100	42	22	40	25	19	27	51	-46	5	-4	40	3	-12	-10
-0.32	27	31	-201	-203	83	115	146	-12	90	-14	-6	10	86	13	157	-15	-4	-10	-7	1	-8	2	0	58	-6	-44	-10	-24	-13	4	-37	19	1	-11	-102	42	22	40	24	14	22	49	-46	15	-6	40	3	-7	-6
-0.32	25	33	-171	-165	80	112	145	-12	90	-14	-4	8	77	12	148	-15	-4	-9	-7	-2	-7	0	-1	58	-6	-44	-9	-21	-11	4	-32	-7	1	-10	-102	42	22	41	23	11	15	49	-48	7	-7	40	2	-6	-7
19.98	22	37	-113	-108	79	107	143	-13	86	-15	-4	3	59	9	129	-14	-5	-9	-7	-2	-6	-2	-4	58	-6	-42	-7	-15	-9	6	-24	-9	1	-7	-104	42	21	40	23	5	10	48	-43	7	-6	41	1	-2	-7
33.16	20	33	-113	-108	79	107	143	-13	88	-15	-4	3	59	8	129	-14	-6	-9	-7	-2	-6	-2	-4	58	-6	-42	-7	-15	-9	4	-23	-9	1	-8	-104	42	21	41	22	5	10	47	-46	4	-7	42	1	2	-6
46.87	22	37	-114	-109	79	107	143	-13	89	-15	-5	4	59	9	129	-14	-6	-9	-7	-1	-6	-2	-4	58	-6	-41	-7	-16	-9	4	-24	-8	1	-8	-105	42	21	41	21	6	5	47	-46	9	-6	42	3	1	-7
60.64	23	36	-117	-110	78	108	144	-13	89	-15	-5	4	61	9	130	-15	-6	-9	-7	-2	-6	-2	-4	58	-6	-42	-7	-16	-9	4	-25	-8	0	-8	-105	42	21	40	21	6	7	47	-46	12	-7	41	1	1	-8
80.95	23	31	-125	-115	78	108	144	-13	89	-15	-5	5	63	9	132	-15	-5	-9	-7	-1	-6	-2	-4	57	-6	-41	-8	-18	-11	4	-27	-13	-2	-9	-105	41	21	40	21	7	12	46	-45	8	-11	38	2	0	-6
101.2	24	37	-140	-131	80	111	146	-11	89	-14	-4	9	68	12	137	-16	-5	-10	-7	-1	-7	0	-2	57	-7	-42	-8	-21	-12	4	-31	-6	2	-10	-104	43	22	40	22	13	21	48	-43	1	-7	44	12	2	0
128.03	26	30	-173	-179	82	112	146	-13	92	-15	-6	9	78	13	148	-18	-5	-9	-8	1	-7	1	-1	57	-6	-41	-11	-27	-14	2	-41	-1	0	-15	-101	42	22	39	24	19	27	48	-46	8	-6	40	3	-7	-8
174.53	31	24	-224	-244	86	117	147	-12	93	-14	-7	13	92	16	162	-20	-4	-9	-8	4	-8	2	2	56	-5	-42	-13	-33	-17	2	-51	1	2	-18	-99	43	23	38	26	26	32	49	-46	15	-4	-14	5	-9	-8
222.8	35	24	-272	-310	93	124	150	-12	95	-14	-8	18	110	19	180	-22	-4	-9	-9	6	-9	4	5	55	-5	-42	-17	-41	-21	0	-64	3	3	-23	-96	43	24	37	30	36	42	50	-44	16	-2	37	6	-13	-7
263.36	39	14	-326	-359	99	131	151	-12	95	-14	-9	22	127	21	198	-24	-4	-9	-9	8	-10	5	8	54	-4	-42	-20	-46	-25	0	-73	7	3	-25	-95	43	25	37	32	42	50	50	-44	4	-1	37	5	-17	-8
310.45	43	8	-363	-394	108	136	152	-12	94	-12	-9	26	142	23	212	-25	-4	-9	-9	9	-11	5	12	53	-4	-42	-22	-52	-28	-1	-81	8	4	-28	-93	43	25	36	35	47	53	50	-45	15	1	36	7	-20	-9
350.95	46	7	-403	-427	115	143	154	-12	94	-12	-10	29	160	25	228	-27	-3	-9	-9	10	-12	6	15	52	-5	-42	-25	-58	-30	-1	-91	11	5	-31	-90	43	25	35	36	54	57	50	-42	1	40	34	5	-24	-10
391.45	49	-2	-435	-455	122	150	155	-12	95	-11	-11	32	179	28	244	-29	-4	-10	-10	11	-13	7	20	51	-5	-42	-26	-63	-32	-2	-98	14	6	-33	-91	43	26	34	37	59	64	50	-42	12	2	35	9	-26	-8
446.26	53	-14	-480	-492	132	160	156	-13	94	-10	-11	36	205	30	269	-32	-3	-10	-10	12	-15	8	25	50	-5	-42	-29	-71	-36	-2	-111	18	5	-37	-89	43	27	33	39	66	75	49	-43	2	3	36	11	-31	-8
479.09	56	-13	-505	-510	139	166	157	-13	95	-10	-11	38	222	31	283	-34	-3	-10	-10	13	-16	8	29	49	-6	-42	-30	-75	-38	-2	-118	19	6	-39	-88	43	27	32	40	72	78	48	-43	14	6	35	9	-34	-10
526.07	58	-23	-542	-539	148	177	158	-13	96	-9	-12	42	248	33	308	-38	-3	-11	-10	15	-18	9	35	49	-6	-42	-32	-81	-40	-2	-128	22	8	-42	-86	43	28	31	44	78	86	48	-43	4	5	34	13	-39	-9
573.86	61	-29	-576	-564	158	186	160	-15	95	-7	-12	45	275	35	332	-41	-4	-11	-10	15	-19	9	40	48	-6	-42	-34	-87	-43	-2	-137	25	9	-45	-87	43	29	30	45	85	104	47	-42	10	7	35	12	-41	-9
614.47	63	-38	-607	-586	167	195	161	-15	95	-6	-12	48	298	37	354	-44	-4	-12	-9	16	-21	10	46	48	-7	-41	-36	-92	-45	-2	-145	26	9	-49	-85	43	29	30	46	90	102	46	-43	2	6	33	11	-46	-11
667.93	68	-42	-646	-615	180	207	162	-16	96	-5	-12	52	332	39	389	-47	-4	-12	-10	17	-22	11	54	47	-7	-42	-38	-101	-49	-2	-157	29	10	-53	-83	43	31	28	49	98	109	44	-44	13	8	32	13	-51	-11
742.55	72	-50	-697	-652	197	222	165	-17	95	-4	-13	57	377	41	432	-53	-4	-13	-9	19	-25	12	63	46	-8	-41	-42	-111	-53	-2	-171	33	14	-57	-81	43	31	27	52	107	127	43	-43	2	10	32	14	-56	-11
796.93	75	-58	-737	-682	211	233	166	-18	94	-3	-13	60	409	43	463	-56	-3	-14	-9	19	-26	12	69	45	-8	-41	-43	-118	-55	-2	-180	36	15	-60	-80	43	32	26	54	114	135	41	-43	3	10	32	15	-61	-9
864.16	79	-63	-783	-716	226	248	168	-19	95	-1	-14	64	452	46	506	-61	-3	-15	-9	21	-29	13	80	44	-9	-41	-47	-128	-59	-1	-194	40	17	-64	-78	43	33	26	58	124	139	40	-44	0	12	30	16	-69	-12
918.32	83	-68	-821	-744	240	260	171	-20	95	1	-14	68	484	47	537	-64	-3	-16	-8	22	-31	14	86	43	-9	-41	-48	-134	-62	-1	-203	42	18	-67	-76	43	34	24	59	129	149	39	-44	3	14	31	17	-73	-9
971.95	86	-82	-855	-769	252	271	172	-21	95	1	-15	71	516	49	568	-67	-3	-17	-8	22	-32	15	93	43	-10	-42	-51	-142	-65	-1	-215	46	20	-70	-75	42	34	24	61	136	160	37	-44	1	12	29	17	-78	-13
1032.75	89	-83	-891	-796	265	283	174	-22	95	3	-15	75	551	51	602	-70	-3	-17	-8	23	-35	15	100	42	-10	-41	-53	-149	-70	-1	-225	49	22	-74	-74	42	35	22	63	143	163	36	-45	0	15	29	19	-81	-14
1073.36	92	-89	-923	-818	275	293	175	-23	95	4	-16	78	580	53	632	-73	-3	-18	-8	24	-36	15	107	42	-11	-42	-55	-155	-72	-1	-234	51	23	-76	-73	42	36	22	65	149	170	35	-45	0	16	28	20	-86	-13
1120.34	95	-98	-951	-840	286	304	176	-24	95	5	-17	81	610	55	664	-75	-3	-19	-8	24	-38	16	114	41	-11	-42	-56	-161	-74	0	-242	53	24	-79	-72	42	36	22	67	154	180	33	-45	12	16	27	24	-91	-11
1160.84	97	-97	-976	-859	295	313	177	-25	96	6	-18	83	636	56	694	-78	-2	-19	-8	25	-39	17	121	40	-11	-42	-58	-166	-76	0	-248	54	25	-81	-72	42	37	22	68	157	185	33	-45	0	20	29	22	-93	-12
1188.38	99	-105	-995	-872	304	320	178	-25	94	6	-19	84	654	56	723	-81	-2	-20	-8	25	-40	17	127	40	-12	-42	-58	-170	-77	0	-253	57	26	-82	-71	42	37	24	68	160	187	31	-45	-2	17	25	21	-95	-13
1201.34	101	-106	-1009	-882	312	326	179	-26	94	7	-19	85	669	57	747	-82	-2	-20	-7	25	-41	17	132	40	-12	-42	-59	-172	-78	0	-257	57	26	-83	-70	42	37	25	70	162	183	31	-46	0	18	26	23	-97	-13
1208.68	101	-106	-1018	-889	318	331	179	-27	90	7	-20	86	678	58	767	-83	-3	-21	-7	25	-43	17	136	40	-12	-41	-58	-173	-78	1	-258	58	28	-83	-70	42	37	26	70	162	186	30	-46	0	19	29	25	-96	-11
1180.98	104	-100	-1038	-907	316	336	134	-27	82	6	-23	86	699	58	814	-82	-4	-19	-6	26	-41	19	144	41	-12	-42	-56	-173	-77	5	-261	57	30	-81	-64	115	49	35	81	172	200	15	-22	-4	17	26	22	-102	-12
1181.03	102	-104	-1039	-908	315	336	133	-27	83	6	-23	86	699	57	814	-82	-4	-19	-6	26	-41	18	144	41	-12	-42	-57	-173	-77	4	-261	56	31	-82	-64	114	49	35	82	171	195	16	-26	-2	16	24	22	-102	-13
1100.03	103	-100	-1035	-905	313	335	133	-27	84	6	-23	85	695	57	811	-82	-4	-20	-6	26	-41	18	143	41	-12	-42	-56	-172	-76	4	-259	54	30	-81	-65	114	48	35	79	169	194	16	-28	1	17	25	21	-101	-13
971.84	100	-93	-1008	-882	301	325	131	-26	86	4	-23	80	659	54	776	-78	-4	-18	-6	24	-38	17	132	42	-11	-42	-52	-158	-70	6	-239	50	26	-74	-68	114	46	37	74	152	177	19	-28	0	16	25	22	-96	-12
742.39	87	-68	-898	-796	252	285	123	-22	89	-1	-21	67	535	47	659	-67	-3	-15	-7	21	-31	15	103	46	-10	-44	-43	-130	-58	4	-199	41	18	-61	-74	112	44	39	65	126	150	25	-29	2	12	28	16	-77	-11
607.07	76	-45	-795	-716	212	250	118	-19	90	-4	-20	57	437	42	563	-57	-3	-13	-7	19	-26	13	82	48	-8	-44	-38	-109	-50	4	-172	31	15	-53	-77	110	41	40	59	109	131	29	-30	8	10	31	14	-63	-10
485.35	65	-22	-688	-633	174	217	114	-17	93	-7	-18	46	347	37	468	-47	-3	-11	-8	16	-21	11	60	50	-6	-44	-32	-89	-42	2	-142	22	11	-42	-81	109	39	41	53	90	105	31	-30	2	9	31	10	-50	-12
384.05	59	-11	-608	-571	148	194	110	-16	94	-9	-16	40	284	34	399	-40	-3	-10	-8	14	-16	10	46	51	-5	-44	-27	-75	-36	2	-122	17	9	-36	-83	108	38	42	48	75	81	32	-29	3	5	33	9	-40	-12
291.92	53	5	-532	-510	128	174	107	-15	95	-11	-15	33	230	29	341	-34	-2	-9	-8	11	-14	9	34	53	-4	-44	-22	-62	-30	2	-100	11	6	-30	-84	106	36	44	44	62	66	32	-29	14	2	36	8	-32	-10
134.35	41	28	-369	-377	92	141	101	-14	94	-14	-12	21	150	21	247	-25	-4	-8	-7	6	-9	5	15	56	-4	-44	-14	-41	-20	4	-65	1	5	-19	-89	104	34	45	37	39	50	30	-30	4	0	37	4	-20	-8
80.84	34	34	-302	-314	81	131	98	-14	95	-15	-11	16	125	18	219	-22	-5	-8	-7	4	-8	4	10	57	-4	-42	-12	-33	-17	6	-53	-2	4	-15	-92	102	33	46	34	31	41	29	-32	7	-3	37	4	-14	-10
32.99	32	36	-248	-254	75	124	97	-13	96	-15	-10	13	108	16	198	-19	-6	-9	-6	3	-7	3	6	57	-5	-43	-10	-28	-14	6	-44	-3	3	-13	-94	100	32	46	32	25	33	28	-33	17	-5	38	3	-13	-7
-0.32	27	38	-208	-202	69	118	95	-14	94	-17	-10	9	95	13	182	-18	-6	-9	-6	1	-6	2	4	58	-5	-43	-8	-24	-12	6	-38	-5	2	-11	-95	100	31	47	31	21	29	27	-34	5	-6	39	1	-8	-8
19.98	22	45	-129	-118	60	111	93	-14	93	-17	-9	4	72	9	156	-16	-7	-9	-6	-1	-6	0	0	58	-6	-42	-6	-18	-10	6	-27	-8	2	-8	-97	97	29	46	27	13	25	28	-32	6	-7	41	3	-3	-6
19.98	23	46	-128	-117	60	111	93	-14	94	-17	-9	4	72	9	156	-16	-7	-9	-6	-1	-5	0	0	58	-5	-41	-6	-18	-10	6	-26	-9	2	-8	-97	96	30	47	27	14	21	28	-34	13	-7	40	2	-4	-6
33.16	22	44	-128	-117	61	110	93	-14	95	-18	-9	4	72	9	155	-16	-7	-10	-6	-1	-6	0	0	58	-6	-41	-7	-18	-10	6	-27	-7	2	-8	-97	96	30	47	27	14	7	28	-35	8	-7	40	2	-5	-4
33.16	22	47	-128	-117	61	111	93	-14	96	-17	-9	4	72	9	156	-15	-7	-10	-6	-1	-6	-2	0	58	-6	-41	-6	-18	-9	6	-27	-8	1	-8	-97	96	30	46	27	14	16	27	-37	18	-7	40	3	-4	-5
40.34	23	44	-128	-117	62	110	93	-14	96	-17	-9	4	72	9	156	-16	-7	-10	-6	-1	-6	0	-1	58	-6	-41	-7	-18	-10	6	-27	-9	1	-8	-97	96	30	46	27	13	19	27	-34	7	-8	40	2	-4	-6
40.34	22	41	-129	-117	63	110	93	-14	96	-18	-10	4	72	9	156	-16	-7	-10	-7	-1	-6	-2	-1	58	-6	-41	-7	-18	-10	6	-27	-6	1	-8	-96	96	29	46	28	13	19	27	-37	6	-8	41	1	-6	-5
46.87	22	44	-130	-118	63	111	93	-14	97	-17	-10	4	72	9	156	-16	-7	-10	-6	-1	-6	0	0	58	-6	-42	-7	-18	-11	6	-28	-8	2	-8	-96	96	30	46	27	14	17	27	-36	6	-7	41	1	-4	-7
53.46	22	43	-133	-120	64	111	93	-14	97	-18	-10	4	73	9	157	-16	-7	-10	-6	-1	-6	0	0	58	-6	-41	-7	-19	-11	6	-28	-7	1	-9	-97	95	30	46	27	15	20	26	-38	7	-8	40	2	-6	-6
67.12	24	42	-136	-122	65	112	93	-14	97	-17	-9	5	75	10	158	-16	-7	-10	-6	-1	-6	0	0	58	-6	-41	-7	-20	-11	6	-30	-6	1	-9	-97	96	30	46	28	15	19	25	-37	17	-8	40	2	-6	-6
87.37	24	43	-148	-135	67	112	94	-14	97	-17	-10	6	78	11	161	-17	-7	-10	-6	0	-6	0	1	58	-6	-41	-8	-22	-12	5	-33	-5	2	-10	-96	96	30	45	28	18	26	24	-36	6	-6	40	2	-7	-7
101.25	26	41	-166	-159	70	114	95	-13	98	-17	-10	8	83	12	167	-17	-6	-10	-7	1	-6	2	2	57	-5	-41	-9	-24	-12	4	-37	-5	2	-12	-95	96	30	45	29	21	28	24	-37	7	-6	39	3	-6	-7
128.03	28	38	-193	-198	74	117	96	-13	99	-17	-11	10	91	14	175	-19	-6	-10	-7	2	-7	2	3	56	-5	-41	-10	-28	-15	4	-44	-3	3	-14	-93	97	30	45	31	26	36	24	-36	11	-4	39	4	-9	-5
161.95	31	34	-228	-253	79	121	97	-13	100	-16	-11	13	101	16	187	-20	-6	-9	-7	4	-8	3	6	56	-4	-41	-12	-33	-17	2	-52	0	3	-17	-92	97	31	44	32	32	36	25	-36	13	-3	39	4	-10	-7
195.37	35	32	-270	-300	84	125	98	-13	100	-16	-12	16	113	17	200	-22	-5	-10	-8	6	-9	4	7	55	-4	-41	-14	-38	-20	2	-60	2	4	-20	-90	97	32	42	34	37	50	26	-35	6	-2	37	4	-15	-7
256.12	39	23	-329	-361	93	133	100	-13	100	-16	-13	21	134	20	220	-25	-5	-10	-8	8	-10	6	12	54	-4	-41	-19	-47	-25	1	-74	6	5	-24	-88	98	33	41	37	48	62	28	-34	5	-3	37	6	-19	-7
296.57	43	20	-373	-403	101	140	102	-13	100	-16	-14	24	150	22	236	-27	-6	-11	-8	9	-11	6	15	53	-4	-41	-21	-52	-27	1	-83	9	5	-27	-86	98	33	40	40	54	66	26	-35	4	1	36	6	-24	-7
343.66	46	13	-415	-438	111	147	104	-13	102	-15	-15	29	170	24	255	-29	-5	-10	-8	11	-12	7	21	52	-4	-41	-23	-59	-30	0	-93	18	8	-30	-84	97	35	40	42	61	76	28	-32	4	1	36	8	-25	-7
397.98	50	6	-459	-475	121	157	105	-13	102	-14	-15	33	194	28	278	-32	-5	-10	-9	12	-14	8	26	51	-4	-41	-26	-66	-34	0	-105	16	6	-34	-83	97	35	38	44	69	79	29	-32	16	3	49	8	-30	-8
445.07	54	1	-501	-508	133	168	107	-14	102	-12	-15	37	219	30	304	-35	-4	-11	-9	14	-15	9	32	50	-5	-41	-28	-73	-36	0	-117	19	7	-38	-81	97	36	37	46	78	86	27	-32	7	6	35	9	-34	-9
519.64	57	-12	-551	-547	147	181	109	-15	102	-10	-16	41	255	32	339	-40	-5	-12	-8	16	-17	10	40	50	-5	-41	-31	-83	-41	0	-131	23	8	-42	-80	97	37	36	49	87	97	24	-34	3	6	36	10	-40	-8
594.16	62	-22	-609	-588	164	198	111	-16	102	-9	-17	46	299	36	384	-45	-4	-12	-8	17	-20	11	50	48	-6	-41	-34	-91	-44	0	-145	27	10	-47	-78	96	38	35	51	95	106	20	-36	5	7	35	12	-46	-8
647.73	66	-31	-651	-620	178	211	113	-17	102	-7	-18	50	333	38	422	-49	-4	-14	-8	18	-22	11	59	47	-6	-41	-36	-99	-47	0	-156	29	12	-51	-77	96	38	35	53	102	114	18	-37	14	8	32	12	-50	-10
702.05	70	-37	-695	-651	192	224	114	-18	101	-6	-18	53	370	40	462	-54	-4	-15	-8	19	-24	12	67	47	-7	-41	-39	-107	-50	1	-168	34	13	-54	-75	96	39	34	56	109	127	17	-37	1	9	32	14	-56	-11
769.34	73	-44	-740	-685	208	238	116	-19	101	-4	-19	57	412	42	508	-58	-4	-17	-8	20	-27	13	78	45	-8	-41	-41	-117	-54	0	-182	36	14	-58	-75	95	39	33	58	118	135	15	-38	2	11	32	15	-62	-11
830.09	76	-53	-783	-716	223	252	118	-20	100	-4	-21	61	452	44	553	-62	-4	-18	-8	20	-29	14	88	45	-9	-41	-44	-126	-58	0	-194	38	17	-62	-73	95	40	33	61	127	148	13	-37	2	11	29	16	-65	-11
945.05	83	-62	-863	-774	252	279	121	-23	99	-1	-22	68	530	48	637	-69	-5	-21	-8	22	-34	15	106	43	-9	-41	-49	-143	-65	1	-219	46	20	-70	-70	95	41	32	66	141	164	9	-36	-1	15	30	19	-76	-9
1029.73	89	-77	-917	-812	274	295	123	-24	99	1	-23	73	583	50	694	-74	-4	-22	-7	23	-37	15	119	42	-10	-41	-52	-153	-70	1	-234	52	23	-74	-69	94	43	32	68	151	173	7	-37	2	15	30	19	-83	-11
1086.97	93	-83	-955	-841	289	309	126	-25	97	3	-24	77	622	52	735	-77	-4	-23	-7	24	-39	16	127	41	-11	-41	-54	-160	-73	1	-244	55	25	-77	-67	94	44	31	71	158	181	5	-38	4	16	29	20	-89	-11
1147.88	96	-95	-989	-867	303	321	128	-26	97	3	-25	80	658	54	773	-80	-4	-24	-6	25	-41	17	135	40	-12	-41	-56	-168	-76	2	-254	59	26	-80	-66	94	44	31	73	164	192	4	-42	8	16	28	20	-94	-12
1194.91	99	-99	-1020	-889	316	332	129	-27	96	4	-27	84	691	56	809	-83	-5	-25	-6	25	-44	17	143	40	-12	-41	-58	-174	-78	2	-263	60	28	-83	-65	94	45	31	74	169	194	3	-41	11	18	27	23	-99	-13
1228.82	102	-103	-1045	-907	328	341	130	-28	97	6	-27	85	718	57	839	-85	-4	-26	-6	25	-45	17	150	39	-12	-41	-59	-179	-80	2	-270	65	29	-85	-64	94	45	31	76	173	200	5	-40	-1	19	26	24	-102	-11
1269.38	104	-109	-1069	-923	338	348	132	-29	97	6	-29	87	746	58	868	-87	-4	-27	-6	26	-46	17	157	38	-13	-41	-60	-185	-81	4	-277	66	29	-87	-64	93	46	32	77	178	202	14	-40	0	18	22	23	-106	-13
1296.22	105	-115	-1088	-939	350	352	132	-30	96	6	-30	88	773	59	896	-88	-4	-27	-6	26	-47	18	163	38	-14	-41	-61	-190	-83	6	-284	69	30	-88	-63	93	46	33	78	184	218	20	-39	-2	18	25	22	-109	-13
1316.36	106	-120	-1102	-948	369	356	132	-31	97	6	-32	89	793	60	921	-89	-4	-28	-5	26	-47	18	167	38	-13	-41	-61	-192	-84	7	-287	72	31	-88	-63	93	46	35	79	187	222	22	-40	-1	19	25	24	-110	-13
1262.14	108	-115	-1126	-965	376	360	131	-23	92	7	-37	92	830	60	981	-87	-5	-26	-6	26	-48	18	173	38	-10	-42	-60	-191	-83	10	-292	76	35	-89	-64	90	47	47	80	198	231	26	-29	1	23	27	29	-101	-8
1194.8	108	-112	-1122	-962	374	359	131	-23	95	7	-37	91	827	60	977	-87	-5	-25	-7	26	-47	18	172	38	-10	-43	-59	-190	-82	10	-290	75	33	-88	-64	90	46	47	80	196	219	26	-32	4	23	28	28	-101	-8
1127.47	106	-111	-1113	-953	367	355	130	-22	98	6	-36	89	814	58	964	-85	-5	-25	-6	25	-47	17	168	39	-10	-42	-58	-186	-80	10	-284	74	34	-86	-66	90	46	47	79	192	219	28	-32	11	23	29	28	-100	-8
1073.25	104	-100	-1085	-931	352	346	129	-21	100	5	-36	85	780	57	932	-82	-5	-23	-7	24	-45	17	161	39	-10	-44	-55	-175	-77	9	-271	69	31	-82	-67	90	45	48	75	182	208	29	-34	15	21	29	27	-96	-7
931.28	95	-89	-1022	-881	312	323	123	-19	101	2	-34	77	695	52	849	-75	-5	-22	-7	22	-39	15	140	42	-9	-44	-49	-155	-69	8	-243	61	26	-72	-71	91	42	48	69	163	185	30	-34	3	17	29	23	-84	-7
776.47	86	-68	-932	-811	258	292	118	-15	104	-1	-32	67	590	48	746	-67	-4	-19	-7	21	-33	13	118	44	-8	-44	-44	-135	-60	8	-215	53	22	-64	-74	91	40	48	63	145	155	31	-34	15	15	30	19	-73	-8
675.11	79	-50	-860	-757	220	270	115	-13	105	-3	-29	61	514	44	668	-61	-4	-17	-9	19	-29	13	101	45	-7	-45	-40	-121	-54	7	-194	46	18	-59	-77	93	39	48	59	131	156	31	-34	4	14	34	18	-62	-7
575.32	71	-34	-784	-697	185	245	111	-11	106	-6	-27	54	438	41	587	-54	-4	-16	-9	17	-25	12	84	47	-5	-45	-36	-106	-49	6	-173	38	14	-52	-80	95	37	48	53	116	136	31	-35	6	13	36	16	-52	-6
499.18	65	-26	-721	-647	158	226	108	-10	107	-8	-26	48	380	38	523	-48	-4	-14	-10	16	-22	11	69	49	-5	-45	-33	-93	-44	6	-155	32	12	-46	-81	96	36	48	50	103	113	31	-35	4	9	33	14	-45	-9
438.32	61	-17	-669	-608	141	211	106	-9	108	-10	-24	44	337	36	474	-44	-3	-14	-9	15	-20	9	59	49	-5	-45	-30	-84	-40	5	-141	28	11	-41	-82	96	35	48	48	94	108	30	-36	5	7	35	11	-40	-6
384.05	57	-2	-618	-567	124	196	104	-8	110	-10	-24	40	297	33	428	-40	-4	-13	-10	13	-17	9	49	50	-4	-45	-27	-75	-37	4	-127	22	9	-38	-84	96	34	48	46	83	91	30	-36	18	9	37	10	-35	-7
324	51	14	-563	-522	108	181	101	-7	112	-12	-22	35	258	30	382	-35	-4	-12	-10	12	-15	8	40	51	-4	-45	-24	-66	-32	5	-112	18	7	-33	-86	96	33	49	42	73	84	28	-39	5	8	36	9	-31	-8
235.76	46	16	-486	-462	88	163	98	-6	112	-14	-20	29	212	26	328	-30	-5	-12	-9	9	-12	6	29	53	-3	-45	-20	-54	-28	5	-91	10	7	-27	-89	95	32	49	38	58	69	26	-44	6	3	37	9	-24	-6
141.64	38	27	-397	-388	69	146	95	-6	112	-16	-18	22	170	21	276	-25	-5	-12	-9	6	-10	5	19	54	-4	-44	-16	-42	-21	6	-71	5	5	-21	-92	95	31	50	34	44	60	24	-42	7	1	37	6	-17	-8
53.3	31	46	-306	-304	55	133	91	-6	111	-17	-17	16	134	17	235	-21	-5	-12	-8	3	-8	2	11	55	-5	-45	-11	-31	-17	6	-54	1	1	-15	-96	95	29	51	31	32	47	21	-42	4	4	40	2	-10	-7
-0.32	27	41	-232	-216	45	124	89	-6	111	-17	-16	11	111	14	208	-18	-8	-12	-8	1	-7	2	6	56	-5	-44	-9	-25	-14	7	-43	-3	3	-13	-97	94	28	51	28	25	34	19	-42	13	-2	39	4	-7	-6
12.8	22	45	-132	-116	37	114	87	-7	105	-19	-14	4	82	9	175	-15	-9	-13	-7	-2	-6	-2	1	57	-6	-42	-6	-16	-11	7	-29	-9	2	-9	-100	91	27	51	26	16	21	17	-38	7	-7	41	1	-3	-7
12.8	22	43	-130	-115	39	114	88	-7	107	-19	-14	3	81	8	174	-16	-9	-13	-7	-2	-7	-2	1	57	-6	-42	-7	-16	-11	6	-29	-8	3	-9	-100	90	27	51	26	15	17	17	-40	6	-8	40	2	1	-5
19.98	22	45	-129	-114	40	114	87	-7	108	-19	-14	4	81	8	174	-16	-10	-12	-7	-2	-7	-2	0	57	-5	-42	-7	-15	-11	6	-29	-8	2	-9	-101	90	27	51	25	15	25	17	-40	6	-7	40	1	-1	-6
40.28	22	43	-130	-115	42	114	87	-7	109	-19	-14	4	82	8	174	-16	-9	-13	-7	-2	-7	-2	1	57	-6	-42	-7	-16	-11	7	-30	-8	1	-9	-100	90	27	51	26	16	26	17	-41	7	-8	39	1	-3	-7
53.46	21	40	-134	-116	43	115	87	-7	109	-19	-15	4	83	8	175	-16	-9	-13	-7	-2	-7	-2	1	57	-6	-42	-7	-18	-11	6	-31	-6	1	-9	-100	90	27	51	26	16	26	17	-40	6	-8	36	0	-3	-6
73.6	22	40	-139	-119	45	114	87	-7	110	-19	-15	5	85	9	176	-17	-9	-13	-7	-1	-7	-2	1	57	-5	-42	-7	-19	-12	6	-32	-5	1	-10	-99	90	27	50	26	17	34	16	-40	17	-8	39	1	-3	-7
87.37	22	85	-151	-128	47	115	88	-7	110	-19	-15	6	88	10	180	-17	-9	-13	-7	-1	-7	-2	2	56	-5	-42	-8	-20	-12	6	-35	9	0	-11	-99	90	27	50	27	20	32	16	-41	-4	7	40	-15	-6	-9
107.68	25	37	-179	-165	50	117	89	-6	111	-19	-16	8	96	12	189	-18	-9	-13	-8	1	-7	0	5	56	-5	-42	-10	-25	-15	5	-44	-4	1	-14	-98	90	28	49	29	26	35	17	-41	5	-5	38	5	-5	-6
154.71	30	20	-228	-240	57	124	91	-6	112	-19	-17	13	111	15	206	-20	-8	-13	-8	3	-8	2	6	54	-4	-42	-13	-32	-18	4	-56	0	4	-18	-96	91	29	48	31	35	47	18	-40	17	-12	36	-1	-11	-11
208.98	34	23	-291	-315	65	130	93	-6	114	-19	-18	18	129	17	225	-23	-8	-13	-9	6	-9	4	10	54	-4	-42	-17	-42	-23	2	-70	4	4	-24	-92	91	30	47	35	46	57	20	-39	5	-4	39	3	-14	-8
290.2	42	16	-378	-400	79	142	96	-6	115	-18	-19	25	161	22	258	-27	-7	-13	-10	9	-12	5	18	52	-4	-42	-21	-53	-29	1	-88	10	5	-29	-88	91	31	46	38	58	67	21	-39	14	0	37	6	-20	-8
363.96	48	5	-444	-457	93	154	98	-6	115	-17	-20	31	192	25	288	-31	-7	-12	-10	11	-13	7	25	50	-4	-42	-25	-63	-33	1	-105	15	6	-34	-86	91	33	44	41	70	80	24	-36	2	-2	33	5	-27	-8
445.07	53	-10	-517	-514	112	172	101	-7	116	-15	-21	37	232	30	330	-37	-6	-13	-10	13	-16	8	34	49	-4	-42	-29	-74	-38	0	-123	26	8	-39	-84	91	34	42	45	82	98	26	-36	12	4	37	9	-32	-12
519.59	58	-21	-577	-561	127	188	103	-8	114	-14	-22	41	273	32	371	-42	-6	-14	-10	15	-19	9	44	48	-5	-42	-32	-84	-42	0	-139	25	9	-44	-82	91	35	40	47	92	98	28	-36	5	4	33	7	-54	-12
586.98	62	-27	-630	-598	144	204	106	-9	114	-11	-23	46	313	35	415	-47	-6	-14	-10	16	-21	10	54	47	-5	-42	-35	-92	-45	1	-151	31	9	-49	-81	91	35	39	50	100	114	27	-38	3	7	33	10	-47	-11
647.73	66	-35	-677	-633	159	219	107	-10	115	-9	-24	50	355	37	460	-52	-6	-15	-10	17	-23	11	64	46	-6	-42	-37	-101	-49	1	-165	35	10	-53	-79	90	36	39	53	108	124	28	-38	6	7	31	12	-51	-13
722.25	70	-47	-735	-676	181	237	109	-11	113	-8	-26	54	410	40	522	-58	-6	-16	-10	18	-27	11	80	45	-7	-42	-40	-115	-54	2	-183	40	12	-58	-78	90	37	39	56	121	144	22	-37	2	8	30	13	-57	-12
830.09	76	-56	-804	-726	210	259	112	-14	113	-6	-29	61	481	43	602	-64	-6	-17	-9	19	-31	12	96	44	-7	-42	-44	-128	-59	2	-203	46	15	-64	-76	89	39	39	60	134	157	21	-38	1	11	28	15	-65	-14
904.61	80	-66	-857	-765	235	276	114	-15	113	-5	-31	65	535	46	662	-68	-6	-17	-9	20	-35	13	108	42	-8	-42	-47	-139	-63	4	-219	50	18	-68	-75	90	39	39	63	145	167	20	-38	8	13	27	16	-71	-12
971.89	87	-78	-903	-798	259	290	117	-17	111	-3	-33	69	585	48	717	-71	-5	-17	-9	22	-36	14	120	41	-9	-42	-49	-147	-67	4	-231	54	22	-71	-73	90	40	40	65	153	169	19	-38	13	11	27	17	-80	-11
1026.27	89	-85	-940	-824	277	301	118	-18	112	-3	-35	72	623	49	758	-75	-5	-18	-9	22	-38	14	128	40	-9	-42	-51	-154	-70	6	-241	58	22	-75	-71	89	41	40	67	159	186	19	-37	-1	14	24	18	-85	-15
1079.78	92	-94	-974	-850	295	311	120	-19	111	-1	-36	75	664	51	802	-78	-5	-19	-9	22	-41	15	137	39	-9	-42	-54	-163	-73	6	-253	60	24	-78	-70	89	42	40	69	168	201	18	-38	-1	13	27	16	-89	-13
1140.59	96	-98	-1009	-876	317	324	121	-20	110	0	-37	79	706	53	848	-81	-5	-19	-8	23	-44	16	147	39	-10	-42	-56	-171	-76	6	-264	65	25	-81	-69	89	43	40	72	176	211	19	-39	10	16	25	21	-94	-11
1208.68	100	-112	-1050	-906	340	336	123	-22	109	1	-39	83	755	55	901	-85	-5	-20	-8	24	-46	16	158	38	-10	-42	-58	-182	-80	7	-277	68	26	-85	-68	88	44	40	74	185	223	19	-39	-2	15	25	22	-101	-11
1269.38	104	-122	-1088	-934	362	349	126	-23	109	3	-40	87	801	57	950	-88	-5	-21	-8	24	-48	17	167	37	-10	-42	-60	-190	-83	8	-289	76	29	-89	-67	88	44	41	76	193	235	20	-40	1	16	24	25	-105	-12
1330.24	107	-125	-1124	-960	383	361	128	-25	108	4	-43	91	847	59	1002	-91	-5	-22	-8	25	-49	17	178	36	-11	-41	-62	-199	-86	9	-301	81	29	-92	-65	88	45	42	79	202	244	22	-40	-1	20	21	25	-111	-13
1377.27	110	-140	-1156	-984	403	374	129	-26	108	4	-46	93	891	61	1053	-93	-5	-23	-7	25	-51	17	186	35	-11	-41	-64	-205	-88	9	-311	84	32	-94	-64	88	45	45	80	211	253	25	-40	-2	17	24	22	-115	-14
1404	113	-144	-1174	-996	417	383	130	-27	107	5	-47	95	920	61	1089	-93	-6	-23	-7	25	-52	18	193	35	-11	-42	-65	-209	-90	10	-316	84	34	-95	-64	88	46	46	81	219	257	27	-40	-2	18	20	23	-117	-15
1417.77	113	-142	-1185	-1004	424	390	130	-27	106	4	-50	95	939	61	1112	-93	-6	-23	-7	25	-53	17	197	35	-11	-42	-65	-210	-91	11	-319	86	35	-96	-64	88	46	46	81	224	259	27	-38	-1	19	20	24	-119	-14
1397.52	126	-132	-1209	-1019	429	412	152	-29	93	1	-59	96	942	60	1190	-92	-7	-27	-7	24	-36	17	199	35	-12	-44	-62	-217	-91	18	-325	92	37	-96	-66	86	47	50	83	258	411	26	-29	-6	18	20	24	-118	-11
1377.22	125	-131	-1209	-1019	429	412	152	-28	96	1	-60	96	942	60	1189	-91	-7	-27	-7	24	-35	17	199	35	-12	-44	-62	-217	-91	17	-325	93	36	-96	-65	86	46	50	84	258	407	26	-32	-5	18	20	24	-116	-12
1241.84	125	-128	-1203	-1013	424	410	151	-28	98	1	-59	95	932	59	1180	-90	-7	-27	-8	24	-35	17	196	35	-12	-44	-61	-213	-89	17	-319	90	37	-94	-67	86	46	50	81	253	402	26	-32	-3	18	21	22	-115	-12
1174.5	122	-123	-1177	-992	408	400	149	-27	99	0	-58	91	893	56	1140	-87	-7	-26	-7	24	-33	16	186	36	-12	-45	-58	-203	-85	16	-305	86	34	-90	-69	86	45	51	78	243	387	25	-34	-2	17	20	22	-114	-9
1079.68	116	-107	-1135	-957	376	385	147	-25	101	-2	-56	85	835	54	1081	-83	-6	-25	-8	22	-30	15	174	37	-11	-45	-55	-191	-80	15	-287	81	31	-84	-70	87	44	51	75	230	356	24	-35	12	16	23	20	-104	-11
924.7	107	-86	-1057	-894	319	355	142	-22	103	-5	-53	75	722	49	963	-75	-6	-23	-8	21	-26	14	150	40	-10	-45	-48	-165	-71	13	-253	68	25	-74	-74	87	41	51	67	201	319	22	-36	-2	14	23	17	-92	-10
756.11	98	-65	-965	-822	257	325	137	-18	106	-8	-48	66	604	46	831	-67	-5	-20	-9	19	-20	12	124	43	-8	-46	-42	-142	-61	12	-220	56	19	-64	-78	88	39	49	61	174	278	19	-36	9	12	28	12	-76	-13
586.76	85	-41	-845	-729	190	286	131	-14	110	-11	-43	56	473	41	681	-57	-5	-17	-10	17	-15	11	95	45	-7	-46	-35	-117	-52	10	-184	43	14	-55	-81	88	37	48	53	146	237	17	-36	0	9	27	11	-60	-12
472.45	75	-23	-751	-654	149	256	127	-12	111	-14	-38	48	381	37	571	-49	-4	-15	-10	15	-11	10	72	48	-5	-46	-30	-96	-44	9	-155	33	10	-45	-85	89	35	48	48	122	205	15	-37	8	6	28	9	-49	-11
330.53	65	-3	-628	-559	108	219	121	-10	113	-16	-33	38	285	31	451	-39	-5	-14	-10	12	-7	8	48	50	-5	-46	-23	-74	-35	8	-121	22	5	-35	-88	88	33	48	42	94	171	11	-36	2	1	32	5	-32	-14
218.05	57	21	-520	-475	80	193	117	-8	114	-18	-29	31	222	26	371	-32	-6	-12	-10	9	-4	6	33	52	-4	-46	-19	-59	-28	8	-95	11	5	-28	-92	88	32	49	37	74	139	8	-36	15	2	32	4	-29	-10
121.28	47	51	-400	-378	57	170	112	-8	114	-20	-26	22	167	21	304	-26	-8	-12	-9	6	-2	5	21	54	-4	-46	-13	-44	-21	8	-71	3	5	-21	-96	87	30	50	32	56	122	5	-36	4	8	38	4	-20	-7
26.41	39	42	-298	-276	42	154	109	-8	115	-21	-24	15	130	15	259	-21	-9	-13	-8	2	-1	3	13	55	-6	-46	-10	-33	-17	9	-54	-1	5	-15	-99	86	28	50	28	43	104	2	-39	5	-4	36	-1	-13	-8
-0.38	34	50	-232	-200	35	146	107	-8	114	-21	-23	11	111	13	236	-19	-10	-13	-8	0	-1	0	9	56	-6	-46	-8	-29	-14	9	-46	-1	5	-13	-101	87	28	51	27	36	73	1	-39	3	1	36	1	-10	-6
-0.38	33	49	-205	-168	32	143	107	-8	114	-21	-22	9	104	12	227	-18	-10	-13	-8	-1	-1	-2	8	56	-6	-45	-8	-26	-14	9	-42	-6	3	-12	-100	88	28	51	26	33	114	0	-40	17	-4	38	4	-6	-5
-0.32	31	49	-180	-146	31	140	106	-8	115	-22	-22	7	97	10	219	-17	-11	-13	-8	-1	-1	-2	6	56	-6	-45	-7	-24	-13	8	-39	-3	3	-11	-101	88	27	50	25	31	70	-1	-41	4	-7	35	1	-8	-9
19.93	30	49	-154	-125	29	138	105	-8	115	-23	-22	5	89	9	210	-17	-11	-13	-8	-2	-1	-2	4	56	-6	-44	-7	-22	-12	9	-35	-4	3	-10	-103	87	27	50	23	27	61	-2	-39	3	-7	37	-2	-5	-8
19.93	28	51	-153	-124	29	137	104	-8	116	-23	-21	6	89	8	210	-17	-11	-13	-8	-2	0	-2	5	56	-6	-44	-7	-22	-12	8	-35	-5	3	-10	-104	87	27	50	23	27	78	-1	-40	4	-4	39	0	-4	-8
33.1	29	50	-152	-123	30	137	106	-8	117	-22	-21	6	89	9	210	-17	-11	-13	-8	-2	-1	-2	4	56	-6	-44	-7	-22	-12	8	-35	-3	3	-10	-102	87	26	50	24	27	81	-2	-40	6	-6	38	-2	-4	-6
46.82	29	49	-153	-124	28	138	106	-8	118	-22	-21	5	88	9	209	-17	-11	-13	-8	-2	-1	-2	4	56	-6	-44	-7	-23	-12	8	-35	-2	2	-10	-102	87	27	50	24	27	64	-2	-41	6	-6	37	1	-4	-6
53.41	29	51	-155	-125	34	138	106	-8	118	-22	-21	6	90	9	211	-17	-11	-13	-7	-2	-1	-2	4	56	-6	-44	-7	-23	-12	8	-37	-4	2	-11	-102	87	27	50	24	28	84	-2	-41	15	-6	36	1	-4	-7
67.07	29	45	-163	-131	35	139	106	-8	118	-22	-22	7	92	10	213	-17	-11	-13	-8	-1	-1	-2	5	56	-6	-44	-7	-24	-13	8	-39	-5	3	-11	-100	87	27	49	25	29	87	-2	-39	5	-8	36	-1	-6	-6
93.91	31	44	-177	-147	35	140	105	-8	119	-22	-22	8	96	11	217	-18	-11	-13	-8	-1	-1	0	6	55	-6	-42	-8	-27	-14	8	-43	-3	3	-13	-100	87	27	50	26	33	91	-2	-40	7	-8	37	2	-9	-8
127.93	33	44	-212	-197	42	143	107	-8	120	-22	-23	12	107	13	229	-19	-10	-13	-8	2	-2	0	8	55	-5	-42	-10	-32	-17	7	-52	17	4	-16	-98	87	28	49	28	40	98	-1	-38	5	-7	37	0	-8	-8
161.95	38	40	-256	-263	50	147	110	-7	121	-21	-23	15	120	16	242	-22	-9	-13	-9	4	-2	3	12	53	-4	-43	-13	-38	-20	6	-62	5	4	-20	-96	88	30	48	30	48	97	0	-39	16	0	34	1	-2	27
229.28	45	34	-337	-352	60	157	111	-7	121	-21	-24	22	145	19	268	-25	-9	-12	-9	7	-3	5	17	52	-4	-43	-18	-48	-25	6	-78	-8	5	-25	-92	88	30	47	34	59	94	2	-38	2	0	36	2	-19	-12
269.84	48	70	-385	-397	67	163	113	-7	123	-21	-25	25	161	21	284	-27	-9	-12	-10	9	-4	6	20	51	-4	-43	-19	-54	-28	4	-88	12	6	-28	-91	89	31	46	36	66	117	3	-38	10	19	34	5	-20	-11
316.87	53	22	-430	-435	74	172	114	-7	122	-20	-26	29	181	23	304	-29	-9	-12	-10	10	-5	6	24	51	-4	-43	-22	-60	-30	4	-97	15	7	-31	-90	89	32	45	38	72	147	4	-37	14	1	33	4	-22	-10
354.13	54	12	-463	-463	80	177	117	-7	124	-20	-26	31	195	25	319	-31	-9	-13	-11	11	-6	7	27	50	-4	-44	-24	-64	-33	4	-104	18	6	-33	-89	89	32	45	39	77	131	5	-38	0	1	31	4	-24	-10
384.21	58	9	-487	-483	87	183	117	-7	124	-19	-27	33	207	26	331	-33	-8	-12	-10	12	-7	7	29	50	-4	-43	-25	-68	-34	4	-109	17	6	-35	-88	89	33	44	40	80	144	5	-38	13	1	30	6	-31	-9
397.93	58	1	-505	-496	90	186	117	-8	125	-19	-27	35	216	26	341	-34	-8	-12	-11	12	-7	8	31	49	-4	-44	-25	-71	-36	4	-116	21	7	-37	-88	88	33	42	41	85	136	6	-40	12	-2	33	7	-29	-9
472.61	62	-7	-567	-545	111	202	120	-9	124	-17	-29	40	254	31	383	-40	-8	-13	-11	15	-10	9	41	48	-5	-44	-29	-81	-40	4	-132	23	10	-41	-85	88	34	41	44	96	160	8	-38	0	2	31	6	-35	-12
526.07	66	-7	-608	-574	121	215	121	-10	123	-16	-29	43	284	32	416	-44	-8	-13	-11	16	-11	9	49	47	-5	-44	-32	-89	-43	4	-144	29	9	-45	-84	88	35	40	47	104	173	9	-39	-1	7	31	6	-38	-9
573.86	69	-21	-647	-604	132	226	123	-10	124	-15	-31	46	314	35	451	-48	-7	-14	-11	17	-12	10	56	47	-5	-42	-34	-96	-46	5	-155	32	9	-49	-83	88	35	39	49	113	182	10	-39	4	5	31	10	-43	-11
634.72	73	-25	-689	-635	146	241	123	-11	124	-12	-32	50	353	37	495	-53	-8	-14	-10	17	-14	10	66	46	-6	-44	-36	-105	-49	6	-167	37	11	-53	-82	88	36	39	51	122	199	11	-38	13	8	31	9	-46	-9
688.23	76	-32	-735	-666	159	254	126	-13	122	-11	-34	53	388	38	538	-57	-8	-15	-10	18	-16	11	75	45	-6	-43	-38	-113	-52	7	-179	42	12	-56	-81	88	37	39	53	130	208	11	-40	-1	10	29	13	-52	-10
756.27	80	-43	-787	-704	180	271	128	-15	121	-10	-37	57	443	41	606	-61	-7	-17	-11	19	-18	12	90	43	-7	-42	-40	-126	-57	7	-197	49	15	-61	-79	87	38	40	57	146	237	12	-38	-1	9	26	11	-59	-13
850.34	86	-54	-852	-752	210	290	131	-16	119	-9	-40	62	513	44	691	-66	-7	-18	-10	20	-21	13	106	42	-8	-43	-44	-139	-62	9	-217	55	18	-66	-78	87	39	41	61	162	258	13	-38	-2	11	26	12	-67	-11
931.45	92	-69	-911	-793	242	308	133	-18	119	-8	-45	67	579	46	768	-70	-6	-21	-10	20	-24	13	122	41	-9	-42	-47	-152	-67	10	-235	61	20	-71	-76	87	40	42	64	177	286	14	-39	0	12	29	16	-72	-11
1032.75	97	-75	-971	-838	281	329	136	-20	117	-6	-48	73	656	49	860	-76	-7	-22	-9	22	-27	14	138	39	-9	-42	-51	-167	-73	11	-256	69	25	-77	-74	86	41	44	68	195	310	16	-39	0	14	25	16	-81	-12
1127.52	104	-92	-1032	-883	321	350	139	-22	115	-4	-52	79	731	52	948	-80	-7	-23	-8	22	-29	15	154	38	-10	-42	-54	-182	-78	12	-275	79	27	-83	-73	86	43	44	71	212	337	17	-39	8	14	25	20	-89	-9
1201.34	109	-102	-1076	-915	348	367	141	-24	116	-3	-54	82	784	54	1010	-83	-6	-24	-8	23	-31	15	164	37	-10	-42	-56	-191	-81	13	-287	85	28	-86	-71	85	44	45	73	224	355	19	-39	1	15	21	20	-95	-9
1269.38	113	-111	-1116	-945	373	380	143	-25	114	-2	-57	87	834	56	1069	-86	-6	-25	-8	24	-32	16	175	36	-10	-42	-58	-201	-85	15	-301	89	32	-90	-69	85	45	46	77	236	368	21	-39	2	15	21	22	-101	-12
1343.25	118	-126	-1157	-977	401	397	145	-27	112	-1	-59	92	890	58	1134	-89	-6	-27	-8	24	-33	16	185	35	-11	-42	-61	-211	-89	15	-316	95	33	-94	-67	85	45	46	79	248	400	23	-38	4	15	19	22	-108	-13
1404.05	122	-134	-1192	-1003	425	410	146	-29	113	-1	-62	95	937	60	1190	-92	-6	-28	-7	24	-34	17	195	33	-12	-42	-63	-219	-92	16	-327	97	35	-97	-67	85	46	47	81	258	428	26	-38	-3	17	21	22	-112	-11
1451.79	125	-143	-1220	-1024	446	424	148	-30	112	0	-64	97	977	62	1242	-95	-6	-28	-7	25	-34	17	203	33	-12	-42	-64	-226	-94	17	-336	101	37	-99	-67	85	47	48	83	270	458	28	-37	-2	18	20	23	-117	-12
1485.11	128	-145	-1244	-1042	465	439	149	-31	111	0	-67	99	1012	62	1289	-96	-6	-29	-7	25	-33	17	211	32	-12	-42	-65	-232	-96	18	-343	109	38	-101	-66	84	47	48	84	280	480	31	-38	-3	20	16	25	-123	-12
1519.07	131	-147	-1264	-1058	494	456	153	-32	109	0	-69	101	1045	62	1338	-96	-6	-30	-7	24	-31	17	218	32	-13	-42	-66	-237	-97	19	-349	110	38	-103	-66	84	47	49	85	292	513	31	-38	-4	23	21	27	-120	-10
1519.07	139	-304	-1294	-1051	514	484	154	-32	97	0	-71	101	1080	64	1403	-91	-6	-33	-7	25	-25	18	229	32	-13	-44	-64	-240	-97	22	-353	115	41	-105	-64	84	48	60	87	320	565	39	-16	-2	-36	21	27	-123	-8
1512.59	138	-155	-1294	-1051	514	485	153	-31	98	0	-71	101	1079	64	1404	-91	-5	-32	-7	25	-24	18	229	32	-12	-44	-64	-240	-97	22	-353	112	42	-105	-65	84	48	60	87	320	563	39	-20	-3	18	19	25	-123	-9
1512.59	139	-149	-1294	-1050	514	485	153	-31	99	0	-71	102	1079	64	1404	-91	-5	-33	-7	25	-25	18	229	32	-13	-44	-64	-240	-96	22	-352	116	41	-105	-64	84	48	60	88	320	568	39	-21	-3	21	20	24	-124	-11
1356.91	138	-151	-1289	-1044	509	483	152	-31	99	-1	-71	100	1071	63	1396	-90	-6	-32	-7	24	-24	17	227	32	-13	-44	-63	-237	-95	22	-348	115	41	-102	-65	84	47	60	87	317	568	39	-22	-4	18	20	25	-122	-11
1269.32	134	-139	-1261	-1019	484	472	150	-30	101	-1	-70	96	1027	61	1349	-87	-5	-32	-7	24	-23	17	218	33	-12	-45	-60	-224	-91	21	-332	109	37	-96	-68	84	46	60	82	302	532	37	-23	0	18	18	26	-118	-9
1113.7	124	-119	-1191	-960	415	445	144	-27	103	-4	-66	85	906	56	1217	-80	-5	-29	-8	22	-20	15	195	37	-11	-46	-54	-197	-80	18	-293	96	32	-85	-71	85	44	59	76	269	471	32	-23	-1	15	23	21	-104	-12
918.22	113	-88	-1092	-881	331	409	140	-22	106	-6	-62	75	763	51	1056	-71	-4	-26	-9	21	-16	14	170	40	-9	-46	-46	-168	-70	16	-256	79	27	-74	-75	86	41	57	68	234	407	24	-24	13	13	25	18	-91	-9
641.03	94	-52	-927	-750	210	348	131	-16	111	-10	-55	59	538	45	789	-58	-2	-22	-10	19	-10	12	125	44	-6	-47	-36	-126	-54	12	-195	55	16	-58	-79	87	37	55	57	173	313	19	-24	0	8	27	13	-68	-9
411.48	76	-16	-754	-617	127	288	122	-12	116	-15	-46	45	370	38	571	-44	-3	-18	-11	15	-4	9	76	48	-5	-48	-27	-91	-40	10	-144	35	4	-42	-84	87	34	54	48	125	237	18	-25	12	6	29	9	-46	-10
222.64	57	19	-554	-468	68	227	114	-8	118	-18	-38	31	240	29	406	-32	-5	-16	-11	10	-1	6	42	51	-5	-48	-19	-63	-29	9	-100	17	7	-30	-89	87	32	55	41	86	185	12	-27	3	0	36	4	-28	-12
26.41	42	42	-337	-287	30	186	106	-8	118	-21	-31	15	148	18	291	-21	-9	-16	-9	2	1	2	20	54	-7	-47	-11	-37	-18	9	-58	-17	12	-18	-98	86	29	56	33	52	129	5	-28	4	-4	32	3	-15	-9
-0.38	35	44	-253	-193	21	175	105	-8	118	-22	-29	10	122	14	262	-18	-9	-16	-9	0	2	0	14	54	-7	-47	-8	-31	-15	9	-48	2	3	-14	-99	86	28	56	30	44	131	3	-27	5	-8	36	-1	-9	-8
-0.32	31	55	-132	-98	923	224	130	-8	116	-8	-23	6	94	15	232	-14	3	-16	-8	-3	2	-2	7	56	-7	-45	-5	-22	-12	10	-34	-4	3	-10	-101	86	27	57	27	33	111	185	-26	5	-8	39	0	-2	-5
-0.27	30	49	-127	-94	903	222	128	-8	118	-8	-23	6	92	15	230	-14	3	-15	-8	-3	2	-3	7	55	-7	-45	-5	-22	-11	10	-33	-4	3	-10	-101	85	27	57	26	31	114	185	-27	4	-8	39	-1	-2	-7
-0.22	29	57	-112	-83	855	215	122	-8	116	-9	-24	4	87	13	225	-14	1	-16	-8	-3	2	-3	6	56	-7	-44	-5	-21	-11	9	-31	-5	3	-9	-103	86	27	56	24	29	110	178	-26	4	-7	39	-1	-2	-6
6.43	28	54	-109	-82	844	214	122	-9	117	-9	-24	4	87	13	224	-14	1	-15	-8	-3	2	-3	6	56	-7	-44	-6	-21	-11	9	-31	-3	3	-9	-103	86	27	56	24	29	112	177	-29	5	-8	38	0	-2	-6
6.37	30	55	-108	-81	841	214	122	-8	118	-9	-23	4	87	14	225	-14	1	-15	-8	-3	2	-3	6	56	-7	-43	-5	-21	-11	9	-31	-4	3	-9	-103	86	27	56	24	29	121	177	-30	16	-8	40	-1	0	-5
20.03	29	54	-108	-82	826	213	121	-8	120	-9	-24	4	87	13	224	-15	1	-14	-8	-3	2	-3	6	56	-7	-44	-5	-21	-11	9	-31	-3	2	-9	-103	86	27	56	24	29	120	176	-28	5	-8	37	0	-1	-6
33.16	28	54	-109	-81	818	213	121	-8	120	-9	-24	4	87	13	224	-15	1	-14	-8	-3	2	-3	6	56	-7	-44	-5	-22	-11	9	-32	-3	3	-9	-103	85	27	56	24	29	119	175	-28	4	-7	38	-2	0	-6
40.34	29	55	-117	-86	817	213	121	-8	122	-9	-24	5	89	14	226	-15	1	-14	-8	-2	2	-3	6	56	-7	-43	-6	-22	-12	9	-33	-2	0	-10	-104	86	27	56	24	30	117	175	-30	6	-6	38	-1	-2	-8
46.93	30	53	-126	-91	817	213	121	-8	122	-9	-24	6	92	15	229	-15	1	-14	-8	-2	2	-2	7	56	-7	-42	-6	-23	-12	9	-35	0	2	-10	-102	85	27	56	24	31	121	175	-30	7	-9	38	-2	-3	-6
53.46	31	54	-134	-95	829	213	121	-8	122	-9	-24	7	94	15	230	-15	1	-14	-8	-2	2	-2	7	56	-7	-43	-6	-24	-12	9	-37	-2	2	-11	-101	85	27	55	25	32	124	174	-30	11	-8	37	0	-3	-6
60.7	32	53	-144	-100	832	213	120	-8	122	-9	-25	7	97	16	233	-16	1	-14	-8	-1	1	-2	8	55	-7	-44	-7	-25	-13	8	-39	-2	3	-11	-102	85	27	56	25	33	122	174	-30	7	-7	36	1	-5	-6
67.18	32	52	-155	-108	831	213	121	-8	123	-9	-25	9	100	16	235	-16	1	-14	-8	-1	1	0	8	55	-7	-42	-7	-27	-14	8	-40	0	2	-12	-102	85	28	55	25	35	121	174	-30	5	-6	37	1	-5	-8
73.71	33	50	-169	-123	830	214	121	-8	124	-9	-25	10	103	17	239	-16	1	-14	-8	-1	1	0	9	55	-6	-42	-8	-28	-15	8	-43	0	3	-13	-100	85	28	56	26	37	133	173	-29	7	-6	36	2	-7	-8
81.05	33	46	-180	-136	829	214	121	-8	125	-9	-25	10	105	18	241	-17	1	-14	-8	0	1	0	10	55	-6	-42	-8	-29	-15	8	-45	1	2	-13	-100	85	28	56	27	38	129	174	-32	11	-6	9	2	-7	-7
94.01	34	49	-191	-150	825	215	121	-8	125	-9	-26	11	108	18	244	-17	1	-14	-9	0	1	0	10	55	-6	-42	-9	-30	-15	8	-47	2	3	-14	-100	85	27	55	28	39	126	173	-31	4	-5	36	1	-8	-7
101.3	35	47	-197	-160	823	216	121	-8	126	-9	-25	12	110	19	246	-17	1	-14	-9	1	1	0	11	54	-6	-42	-9	-31	-16	8	-48	3	3	-15	-97	85	28	55	28	41	127	173	-31	14	-5	36	2	-7	-9
107.73	36	43	-205	-171	821	216	121	-8	126	-9	-26	13	112	19	248	-18	1	-14	-9	1	1	1	12	55	-6	-42	-9	-32	-16	8	-50	3	3	-15	-98	85	28	55	29	41	133	173	-30	16	-7	37	2	-10	-7
114.16	36	45	-212	-181	819	217	121	-8	127	-9	-25	13	114	19	251	-18	1	-14	-9	2	1	2	12	54	-6	-42	-10	-33	-17	8	-52	4	4	-16	-98	85	28	55	29	42	135	174	-30	0	-4	36	1	-8	-10
121.5	37	44	-221	-194	814	217	122	-8	128	-9	-26	13	116	20	253	-18	2	-14	-9	2	1	2	12	54	-5	-43	-10	-34	-18	7	-53	3	4	-16	-99	85	28	55	30	44	133	173	-29	15	-5	35	1	-9	-9
128.09	38	43	-227	-203	809	218	121	-7	129	-9	-26	14	118	20	255	-19	2	-14	-9	2	0	2	13	54	-5	-42	-10	-35	-18	8	-54	5	3	-17	-97	85	29	55	30	44	136	173	-30	2	-6	37	-1	-7	-9
141.8	38	44	-239	-219	807	219	122	-7	129	-9	-26	15	121	21	259	-19	2	-13	-9	3	0	2	13	54	-5	-43	-11	-36	-18	7	-57	5	4	-18	-96	85	29	54	31	46	134	173	-31	13	-5	35	1	-9	-8
162.05	42	42	-259	-247	803	221	122	-7	129	-8	-26	17	127	22	265	-20	1	-16	-9	4	0	4	14	54	-5	-42	-13	-39	-20	7	-62	6	4	-19	-95	85	29	54	31	50	138	174	-30	3	-4	37	0	-11	-6
175.18	43	39	-277	-267	802	222	123	-7	131	-8	-26	18	132	23	271	-21	2	-15	-9	4	0	3	15	54	-5	-42	-13	-42	-21	7	-65	8	4	-20	-95	85	29	54	31	52	143	174	-29	4	-6	34	1	-14	-8
188.84	45	42	-297	-285	802	224	123	-7	131	-9	-27	20	138	23	276	-22	2	-15	-9	5	0	3	17	53	-5	-42	-14	-44	-23	6	-68	-11	5	-21	-94	85	30	53	33	55	151	174	-30	4	-2	36	2	-12	-9
209.09	46	38	-319	-306	803	227	124	-7	132	-9	-27	21	146	24	284	-23	2	-16	-10	6	-1	4	19	52	-4	-42	-16	-47	-25	6	-75	11	5	-24	-94	85	30	53	35	61	154	174	-30	5	-2	36	4	-15	-7
256.18	49	35	-365	-349	804	232	124	-7	132	-8	-28	25	162	26	301	-25	2	-17	-10	8	-1	5	22	52	-4	-42	-19	-54	-27	5	-85	13	6	-27	-91	85	31	52	37	68	162	175	-30	4	0	35	4	-18	-8
324.22	55	31	-433	-403	816	242	127	-8	133	-7	-29	30	191	30	331	-29	3	-17	-10	10	-3	6	28	50	-4	-42	-22	-63	-31	5	-100	18	5	-32	-89	85	32	50	40	79	175	177	-28	8	2	40	23	-15	12
384.26	59	28	-489	-446	826	255	130	-8	133	-6	-30	35	220	33	362	-33	3	-17	-11	13	-4	8	34	49	-4	-42	-26	-72	-36	5	-117	24	4	-37	-86	86	33	49	44	91	183	179	-26	4	6	32	13	-27	-6
472.66	66	6	-565	-500	843	274	131	-9	133	-4	-32	41	262	37	410	-39	3	-18	-11	16	-6	9	44	48	-5	-42	-29	-83	-40	4	-134	29	8	-41	-85	85	34	47	47	102	205	181	-28	3	4	30	9	-35	-9
546.48	71	-5	-630	-548	860	292	133	-10	132	-3	-33	46	309	40	466	-45	4	-18	-11	17	-8	10	56	47	-5	-42	-32	-94	-45	6	-151	35	11	-47	-82	85	35	46	50	116	222	182	-27	2	8	30	9	-40	-9
600.64	75	-17	-674	-578	874	306	135	-11	133	-1	-35	50	344	42	508	-49	4	-19	-11	17	-10	10	65	46	-6	-42	-34	-102	-48	6	-163	39	12	-51	-82	85	36	46	52	126	235	183	-27	13	7	30	9	-48	-7
647.78	78	-22	-715	-607	886	319	137	-11	133	0	-37	52	377	43	548	-53	4	-21	-10	18	-11	11	73	45	-6	-43	-35	-110	-50	7	-174	45	12	-54	-80	85	36	46	53	135	253	184	-27	1	9	30	13	-52	-8
702.05	82	-30	-752	-633	900	331	138	-13	133	1	-39	55	415	45	597	-57	5	-22	-10	18	-13	12	85	45	-7	-42	-38	-120	-54	8	-187	48	14	-57	-79	85	37	46	55	148	270	184	-28	12	9	32	11	-51	-11
789.64	88	-41	-816	-678	928	349	141	-15	131	2	-44	60	482	48	679	-61	5	-23	-10	20	-14	13	102	43	-7	-42	-41	-132	-58	9	-206	58	15	-62	-79	84	38	47	59	165	301	187	-29	-1	10	29	15	-59	-11
864.22	93	-50	-874	-718	956	367	143	-17	130	3	-48	64	542	50	755	-65	5	-25	-10	20	-16	13	118	42	-8	-42	-43	-144	-62	10	-222	65	19	-67	-77	84	39	48	61	182	324	187	-29	0	11	24	15	-67	-10
951.7	98	-65	-928	-756	988	387	145	-19	128	4	-52	69	613	52	844	-69	6	-26	-10	21	-18	14	136	40	-9	-42	-46	-157	-68	12	-243	74	23	-72	-76	83	40	49	64	202	360	189	-30	1	10	26	16	-75	-11
1026.27	105	-70	-979	-793	1024	408	148	-20	128	5	-55	74	679	54	925	-72	6	-27	-9	21	-19	14	151	40	-9	-41	-49	-169	-72	12	-258	80	25	-77	-75	83	41	51	67	220	387	190	-29	7	14	23	21	-79	-10
1100.09	108	-86	-1026	-827	1058	428	150	-22	128	5	-58	78	742	57	1003	-76	6	-29	-9	22	-20	15	164	38	-10	-42	-52	-180	-76	14	-273	87	28	-81	-74	82	42	52	70	236	422	191	-29	-2	13	25	16	-87	-11
1160.14	113	-94	-1062	-854	1082	443	151	-23	129	6	-59	81	788	58	1058	-78	6	-30	-9	22	-21	16	173	38	-10	-42	-53	-188	-79	14	-283	92	29	-84	-73	82	43	52	72	246	441	192	-30	11	14	23	20	-92	-12
1228.82	118	-103	-1108	-884	1113	461	153	-25	126	7	-61	85	845	60	1127	-81	6	-31	-8	23	-22	16	184	37	-10	-42	-56	-198	-83	16	-297	97	31	-88	-72	82	44	52	74	259	464	193	-30	0	15	22	21	-96	-11
1262.2	120	-110	-1128	-899	1127	469	154	-26	126	7	-63	87	872	61	1158	-83	6	-32	-9	23	-22	16	189	36	-10	-42	-57	-203	-84	16	-303	97	31	-90	-71	81	44	53	75	266	477	193	-30	-1	16	23	21	-100	-10
1296.16	122	-115	-1147	-913	1140	477	155	-26	125	7	-64	89	899	62	1192	-84	6	-32	-8	23	-23	16	195	35	-10	-43	-58	-208	-86	16	-311	103	33	-91	-70	81	44	53	77	274	490	194	-31	-2	16	22	23	-107	-9
1316.36	123	-120	-1162	-924	1151	483	155	-27	126	8	-64	91	920	63	1216	-85	6	-33	-8	23	-23	16	198	35	-11	-42	-59	-212	-87	17	-316	102	32	-93	-70	81	45	53	77	279	498	195	-30	7	19	22	24	-105	-8
1343.2	126	-123	-1176	-934	1162	489	156	-28	126	9	-65	93	941	63	1241	-86	6	-33	-8	23	-24	16	202	35	-11	-42	-60	-216	-89	17	-321	104	33	-94	-69	81	45	53	79	285	508	195	-31	0	18	22	26	-108	-8
1383.75	128	-129	-1199	-951	1181	499	158	-29	125	8	-67	95	977	64	1285	-87	6	-34	-8	24	-24	16	210	33	-12	-42	-61	-223	-91	18	-331	109	35	-97	-69	81	45	54	80	295	531	196	-31	1	19	23	23	-108	-10
1438.02	132	-136	-1228	-972	1207	512	160	-30	124	9	-68	98	1022	66	1340	-90	6	-35	-8	24	-24	17	219	33	-12	-42	-63	-231	-95	19	-342	115	37	-100	-68	80	46	54	82	307	558	198	-28	-5	60	14	26	-117	-13
1492.34	136	-148	-1255	-992	1233	525	161	-31	125	10	-70	101	1067	68	1393	-91	6	-36	-7	24	-24	18	227	32	-12	-42	-64	-239	-97	20	-352	120	38	-103	-67	80	46	55	84	319	584	198	-28	-1	19	21	25	-118	-9
1552.99	143	-159	-1287	-1014	1267	546	163	-33	124	11	-72	106	1124	70	1468	-93	7	-38	-7	26	-22	18	239	31	-10	-42	-66	-250	-100	22	-364	124	40	-108	-66	80	47	56	85	336	628	198	-29	0	20	24	24	-123	-11
1586.41	148	-165	-1306	-1026	1293	565	164	-34	124	11	-73	108	1166	72	1527	-92	8	-39	-8	27	-20	19	247	30	-9	-42	-67	-256	-102	23	-370	134	42	-110	-65	80	47	57	86	350	668	196	-27	0	21	19	29	-129	-8
1609.58	153	-172	-1321	-1037	1316	586	165	-35	122	11	-76	110	1201	73	1575	-90	8	-40	-7	27	-15	19	255	30	-9	-42	-68	-261	-103	24	-377	140	44	-111	-64	80	47	58	88	364	704	191	-26	-1	21	18	28	-133	-8
1620.32	163	-170	-1331	-1041	1330	603	165	-35	122	12	-78	113	1224	74	1607	-87	8	-41	-7	27	-14	19	261	30	-9	-42	-68	-263	-104	23	-378	142	44	-112	-64	80	47	59	88	373	716	186	-27	1	25	15	32	-131	-10
1478.47	209	-138	-1366	-1041	654	674	163	-33	110	10	-101	118	1278	77	1682	-66	13	-35	-6	27	-4	20	283	30	-11	-45	-67	-265	-103	23	-381	153	50	-112	-65	80	50	62	90	457	817	112	-13	-3	27	18	29	-119	-7
1478.47	209	-143	-1367	-1041	653	674	163	-33	111	10	-101	118	1278	77	1682	-66	12	-35	-6	27	-4	20	283	31	-11	-44	-67	-265	-103	23	-381	154	50	-112	-63	80	50	62	91	457	820	111	-16	9	25	16	29	-120	-5
1451.63	209	-141	-1365	-1039	651	673	163	-33	113	10	-101	118	1274	77	1677	-66	13	-36	-6	27	-4	20	283	31	-11	-45	-66	-264	-103	23	-380	154	49	-111	-65	79	50	62	91	455	813	112	-16	1	25	16	27	-117	-7
1370.63	206	-131	-1351	-1026	634	666	161	-32	116	9	-100	114	1246	74	1647	-65	13	-36	-7	26	-4	19	277	32	-11	-45	-65	-256	-100	22	-368	150	46	-107	-66	80	49	63	88	445	794	110	-16	3	26	17	28	-115	-6
1228.66	197	-110	-1297	-977	564	642	157	-29	120	7	-97	106	1132	70	1517	-60	13	-34	-7	26	-3	18	259	35	-10	-46	-58	-227	-90	19	-329	137	40	-94	-70	81	46	62	80	401	698	101	-18	15	23	21	24	-104	-7
971.73	174	-72	-1184	-881	430	595	149	-24	124	5	-93	92	932	64	1286	-54	15	-31	-9	24	-3	16	232	39	-7	-47	-49	-189	-76	16	-278	114	32	-79	-74	82	43	59	70	334	577	86	-19	1	20	18	20	-84	-6
546.16	135	-15	-962	-700	228	490	137	-14	128	2	-76	68	581	55	845	-41	16	-24	-11	22	0	14	155	45	-2	-48	-34	-125	-52	12	-190	73	18	-55	-80	84	38	55	54	212	389	65	-21	4	14	25	14	-53	-8
289.93	99	41	-705	-506	102	365	124	-7	133	-3	-60	48	348	45	541	-28	13	-18	-11	16	1	10	79	50	-2	-48	-23	-80	-36	9	-124	36	10	-36	-87	84	34	56	42	128	284	54	-24	16	11	31	11	-19	-10
113.94	74	70	-477	-348	47	294	115	-6	135	-6	-50	31	223	34	392	-19	10	-18	-10	8	2	6	42	52	-4	-48	-16	-54	-26	8	-83	17	7	-24	-93	83	31	57	34	85	227	45	-25	6	1	36	5	-10	-7
32.89	63	82	-354	-250	29	272	112	-6	136	-8	-46	23	177	28	338	-16	8	-17	-9	4	3	4	30	54	-5	-47	-12	-43	-21	8	-64	16	6	-18	-97	82	30	58	30	64	206	41	-24	6	1	35	2	-1	-6
-0.43	57	84	-279	-177	21	259	110	-6	137	-9	-44	18	152	24	310	-13	7	-18	-8	2	3	2	25	55	-6	-46	-9	-37	-18	8	-55	7	17	-15	-98	81	30	58	29	54	195	36	-24	19	0	35	3	3	-5
-0.43	52	87	-240	-144	17	253	109	-6	136	-10	-43	15	140	21	296	-12	7	-18	-8	0	3	2	22	55	-6	-46	-8	-34	-16	9	-50	6	5	-14	-98	81	29	58	27	49	190	34	-26	-10	-1	36	2	5	-6
-0.43	51	91	-212	-121	15	249	108	-6	136	-10	-43	14	132	20	287	-12	7	-18	-8	-1	2	2	20	55	-7	-46	-8	-31	-15	8	-46	3	5	-13	-99	81	29	58	26	44	179	33	-24	8	0	36	1	9	-6
19.87	48	89	-183	-107	15	244	107	-6	135	-10	-42	12	124	19	278	-11	7	-18	-8	-1	2	0	18	55	-6	-45	-7	-30	-15	9	-43	2	5	-12	-100	80	28	58	25	39	181	31	-24	8	-3	37	1	9	-6
26.46	49	88	-180	-104	17	244	107	-6	135	-10	-42	12	123	19	278	-11	7	-17	-8	-1	2	0	18	56	-6	-45	-8	-30	-15	8	-43	2	6	-12	-99	80	28	58	26	38	178	30	-25	9	-3	38	2	11	-2
26.46	49	87	-178	-104	18	243	106	-6	136	-11	-42	11	122	18	276	-11	7	-17	-8	-1	2	0	17	55	-6	-45	-7	-30	-15	8	-43	1	5	-12	-99	80	28	58	26	37	180	30	-22	6	-3	37	3	8	-3
26.57	46	86	-172	-101	21	239	104	-7	131	-12	-42	10	120	18	274	-12	6	-18	-8	-1	2	0	17	55	-6	-44	-8	-30	-15	8	-43	0	5	-12	-100	80	28	57	24	34	180	28	-22	6	-4	37	2	7	-1
33.16	46	86	-172	-100	21	239	104	-7	133	-12	-42	10	119	18	274	-13	6	-18	-8	-1	2	0	17	55	-6	-44	-8	-29	-15	8	-42	3	5	-12	-100	79	28	57	24	34	181	27	-26	4	-5	37	1	9	-5
46.87	47	87	-172	-101	21	239	104	-7	135	-12	-42	10	120	18	275	-12	6	-17	-8	-1	2	0	17	55	-6	-44	-8	-30	-15	8	-43	3	4	-12	-100	79	28	57	24	34	187	27	-27	6	-3	37	3	10	-5
67.12	46	85	-179	-105	22	240	104	-7	137	-12	-42	11	122	18	276	-12	6	-18	-8	-1	1	0	17	55	-6	-44	-8	-31	-15	8	-45	5	3	-13	-100	79	28	57	25	35	183	27	-28	9	-3	37	3	9	-4
87.37	48	88	-194	-116	24	241	104	-7	137	-12	-43	12	126	19	280	-13	7	-18	-8	0	1	2	18	55	-6	-44	-9	-33	-17	7	-48	7	3	-14	-98	79	28	56	26	38	185	27	-29	7	0	37	2	10	-5
93.96	49	82	-212	-140	26	242	105	-7	138	-11	-43	14	131	20	285	-14	7	-18	-8	1	1	2	19	55	-5	-42	-10	-35	-18	7	-52	6	13	-15	-98	79	29	56	26	40	184	27	-28	7	-4	35	2	6	-3
107.68	51	78	-232	-166	29	244	105	-7	141	-12	-43	15	137	21	292	-16	7	-17	-8	2	1	2	20	54	-5	-44	-11	-38	-19	7	-56	9	4	-17	-97	80	29	56	27	44	186	28	-25	8	-2	38	3	5	-4
134.51	54	77	-264	-210	32	247	106	-7	141	-12	-43	18	146	23	302	-16	7	-17	-9	3	0	3	21	53	-5	-44	-12	-42	-21	6	-63	10	5	-19	-95	80	30	55	28	48	188	28	-25	9	-2	37	3	1	-5
175.12	57	76	-307	-260	37	251	108	-6	141	-12	-44	22	160	25	317	-18	7	-17	-10	5	0	5	24	53	-4	-44	-16	-48	-24	6	-73	13	5	-22	-94	81	31	54	31	56	206	29	-26	7	1	35	4	1	-6
222.86	62	73	-353	-303	45	257	109	-6	142	-10	-45	26	176	28	333	-21	8	-17	-10	8	-1	6	27	52	-4	-44	-18	-55	-27	4	-85	17	7	-27	-91	81	32	54	34	65	219	31	-27	15	2	34	6	-4	-3
276.37	67	67	-421	-357	55	266	112	-6	144	-10	-45	31	201	31	358	-24	8	-17	-11	11	-2	7	33	50	-3	-44	-21	-64	-32	2	-99	22	7	-31	-89	81	33	52	36	77	227	33	-25	17	6	34	7	-9	-6
343.66	74	64	-493	-407	68	279	114	-7	144	-9	-47	36	231	35	390	-27	8	-16	-11	13	-3	9	38	49	-3	-44	-25	-72	-36	4	-114	26	8	-35	-86	81	34	51	40	88	244	33	-25	4	8	34	7	-15	-6
404.51	79	48	-549	-447	81	291	116	-7	145	-8	-48	41	262	37	423	-31	8	-17	-11	15	-5	10	46	49	-3	-44	-28	-81	-39	4	-128	33	8	-39	-83	82	35	49	43	99	255	36	-26	7	6	34	8	-20	-5
465.32	85	39	-605	-482	94	303	118	-8	145	-7	-49	44	292	39	459	-35	8	-17	-11	17	-6	11	53	48	-4	-44	-30	-88	-42	4	-140	34	9	-43	-82	82	36	48	45	109	262	39	-26	11	8	30	9	-24	-11
519.64	89	29	-657	-516	111	319	120	-8	145	-6	-52	48	329	42	507	-40	9	-18	-11	18	-8	12	63	46	-4	-43	-32	-98	-46	6	-156	44	10	-49	-80	82	37	47	49	125	296	42	-24	4	11	32	12	-26	-6
586.98	95	18	-711	-551	128	335	122	-10	144	-5	-55	52	370	43	557	-44	8	-18	-11	19	-8	13	73	46	-4	-44	-34	-107	-49	6	-168	47	12	-52	-78	82	37	47	51	138	306	44	-27	15	10	28	7	-34	-8
641.2	100	17	-755	-580	144	349	124	-11	145	-3	-58	56	409	46	609	-47	9	-19	-11	20	-9	13	85	45	-5	-42	-37	-117	-52	7	-182	52	14	-55	-78	81	39	47	53	155	333	46	-25	14	14	27	14	-40	-9
708.53	106	-3	-811	-617	166	367	127	-13	143	-2	-63	60	462	48	675	-51	9	-21	-11	21	-10	13	101	44	-6	-43	-39	-128	-56	8	-197	63	17	-60	-77	81	40	48	56	175	360	49	-25	2	13	29	13	-44	-7
776.57	114	-6	-864	-651	193	388	129	-14	143	-1	-68	64	519	50	750	-54	10	-23	-10	21	-10	15	121	43	-6	-42	-42	-139	-60	9	-213	69	18	-63	-76	81	40	48	58	195	394	52	-26	15	17	28	16	-48	-8
843.91	119	-17	-912	-683	219	409	131	-16	141	-1	-73	67	573	51	817	-56	9	-24	-10	22	-10	15	138	42	-7	-42	-44	-148	-63	11	-226	78	20	-67	-75	80	41	50	62	217	427	54	-24	2	16	25	18	-56	-5
918.32	127	-30	-962	-717	253	438	134	-18	138	0	-78	72	638	53	900	-58	10	-26	-10	22	-10	16	157	41	-8	-42	-46	-159	-68	12	-243	89	23	-71	-74	80	43	51	64	239	464	57	-23	16	16	24	17	-59	-7
974.7	134	-32	-1001	-744	281	460	135	-19	138	0	-80	75	690	55	962	-59	10	-27	-9	22	-10	16	169	41	-8	-42	-48	-168	-71	12	-254	94	25	-74	-71	80	43	51	67	256	498	60	-21	5	18	23	22	-64	-6
1046.47	142	-47	-1045	-775	317	485	138	-21	135	1	-84	79	752	57	1041	-61	10	-28	-9	22	-10	16	184	39	-9	-42	-50	-178	-75	14	-267	102	27	-78	-71	79	44	52	69	277	513	63	-24	2	17	21	21	-72	-6
1079.78	146	-50	-1067	-791	335	498	139	-22	137	1	-85	81	784	58	1081	-61	10	-28	-8	23	-9	16	192	39	-9	-42	-51	-184	-77	13	-274	105	29	-80	-71	79	44	53	69	288	537	64	-21	13	18	22	20	-76	-8
1113.8	149	-58	-1091	-807	355	511	140	-23	136	1	-87	83	821	59	1128	-62	10	-29	-8	23	-9	17	200	38	-9	-42	-52	-191	-79	14	-285	110	31	-83	-70	79	45	53	72	304	563	67	-22	2	18	23	20	-78	-6
1181.09	157	-71	-1130	-837	396	536	142	-24	136	2	-89	88	892	61	1216	-63	10	-30	-8	24	-9	18	216	37	-9	-41	-55	-204	-83	15	-301	118	34	-88	-68	79	46	55	74	328	606	71	-22	4	18	22	24	-83	-6
1262.2	166	-78	-1174	-870	445	563	145	-26	136	3	-92	95	967	63	1309	-65	11	-32	-8	26	-8	19	231	36	-8	-41	-58	-215	-87	16	-318	128	36	-92	-67	78	47	55	77	354	652	76	-21	14	21	22	25	-88	-8
1336.66	175	-90	-1218	-902	492	589	148	-28	134	4	-95	100	1042	66	1402	-66	11	-33	-7	26	-8	19	245	35	-8	-41	-61	-229	-92	17	-335	138	39	-98	-65	77	48	57	81	380	704	81	-20	1	23	21	28	-97	-7
1438.07	187	-107	-1268	-940	551	618	152	-30	133	4	-98	106	1132	69	1512	-67	12	-35	-7	27	-7	19	261	33	-9	-41	-64	-245	-97	19	-355	148	43	-103	-63	77	49	58	84	409	756	88	-20	15	24	20	27	-105	-5
1545.8	201	-128	-1325	-984	618	650	155	-33	132	5	-102	112	1229	72	1631	-68	12	-38	-6	27	-6	19	278	31	-10	-41	-68	-262	-103	20	-376	159	46	-110	-63	76	50	59	87	439	815	98	-17	2	25	16	30	-114	-7
1633.45	210	-148	-1369	-1017	672	679	157	-35	130	6	-107	118	1307	74	1725	-67	12	-40	-6	27	-3	20	292	30	-11	-40	-70	-271	-106	21	-388	167	49	-114	-62	76	50	60	89	457	858	110	-17	1	26	14	29	-121	-5
1647.16	217	-147	-1382	-1024	684	692	157	-35	129	6	-108	118	1323	75	1744	-65	11	-40	-6	27	-3	20	295	30	-11	-41	-70	-272	-106	21	-389	169	49	-114	-62	76	50	61	89	462	868	114	-16	13	29	16	33	-121	-7
1653.7	219	-149	-1385	-1026	685	696	158	-36	131	6	-109	119	1327	75	1752	-64	12	-39	-6	27	-2	20	298	30	-11	-41	-70	-272	-106	21	-389	169	50	-115	-62	76	50	61	89	466	883	116	-16	2	28	16	33	-122	-5
1653.7	220	-155	-1389	-1029	687	699	157	-36	130	6	-110	119	1332	75	1760	-63	12	-39	-6	27	-2	20	299	30	-11	-41	-70	-273	-107	21	-390	173	49	-114	-62	76	50	61	90	471	884	118	-16	2	26	13	31	-125	-6
1653.7	221	-155	-1393	-1031	690	703	158	-36	130	6	-110	120	1339	75	1769	-63	12	-39	-5	27	-2	20	301	30	-11	-42	-70	-274	-107	22	-391	175	51	-115	-63	76	50	61	89	474	887	120	-16	1	26	13	28	-122	-9
1660.88	223	-152	-1397	-1034	697	706	158	-36	131	5	-111	120	1346	75	1780	-62	12	-39	-5	27	-2	20	303	30	-11	-41	-71	-276	-107	21	-393	176	50	-115	-62	76	50	61	90	480	895	123	-18	4	28	16	33	-120	-6
1673.95	225	-156	-1403	-1040	704	712	158	-36	131	6	-111	121	1356	75	1793	-62	12	-40	-6	27	-2	20	304	30	-11	-42	-71	-277	-108	22	-394	177	51	-116	-62	75	50	62	90	486	912	126	-16	2	25	12	29	-125	-7
1681.18	227	-158	-1408	-1043	711	717	158	-37	131	5	-112	121	1364	77	1805	-61	12	-40	-6	27	-2	20	306	30	-11	-42	-71	-278	-108	22	-396	178	52	-116	-62	75	51	62	91	489	914	129	-15	2	27	13	31	-127	-7
1687.61	233	-159	-1414	-1048	722	726	159	-37	131	6	-113	122	1378	77	1828	-59	12	-40	-5	28	-2	21	311	30	-11	-42	-71	-280	-109	22	-398	180	53	-117	-62	75	50	63	90	498	936	135	-13	-1	27	14	29	-124	-7
1687.61	242	-195	-1458	-1073	740	777	202	3	144	-32	-113	128	1430	82	1933	-35	13	-36	-6	27	-3	20	336	28	-12	-45	-71	-286	-109	21	-403	196	60	-119	-63	74	52	65	95	546	1017	182	-15	-1	31	14	32	-128	-5
1687.61	241	-202	-1459	-1074	740	777	201	3	147	-33	-113	128	1430	81	1933	-35	13	-36	-6	28	-3	20	336	28	-12	-45	-71	-286	-109	22	-403	195	59	-119	-63	74	52	65	94	546	1023	182	-13	2	30	13	32	-129	-6
1687.61	241	-205	-1458	-1074	740	777	202	3	147	-33	-113	128	1430	82	1933	-35	13	-36	-6	28	-3	20	336	28	-12	-45	-71	-286	-110	22	-403	198	58	-119	-63	74	52	65	94	546	1021	183	-12	8	28	13	29	-128	-5
1681.13	241	-204	-1458	-1073	739	778	201	3	149	-32	-113	128	1429	82	1933	-35	13	-36	-6	27	-3	20	336	28	-12	-45	-70	-286	-109	22	-403	198	58	-119	-63	74	52	65	95	546	1012	182	-13	2	28	14	30	-130	-5
1518.97	240	-201	-1454	-1068	732	774	200	3	149	-33	-112	127	1415	81	1916	-34	13	-36	-6	28	-4	20	333	29	-12	-45	-69	-280	-107	22	-394	198	56	-116	-64	74	51	65	92	536	994	180	-15	13	29	14	31	-127	-5
1269.22	221	-165	-1377	-996	615	738	196	8	151	-35	-109	114	1253	73	1725	-31	14	-33	-7	27	-4	19	312	32	-10	-46	-62	-246	-95	19	-350	180	50	-101	-68	75	48	64	84	483	883	160	-15	4	25	16	25	-112	-5
1113.64	203	-140	-1307	-932	512	704	191	11	155	-36	-106	105	1112	71	1554	-29	15	-31	-8	27	-6	18	295	35	-8	-47	-55	-220	-85	18	-318	167	43	-92	-70	76	45	61	77	434	791	140	-17	14	22	19	23	-97	-6
823.45	169	-97	-1166	-813	342	628	181	16	159	-38	-96	88	853	64	1225	-26	16	-25	-10	26	-7	17	255	40	-5	-48	-46	-174	-70	16	-258	141	31	-74	-74	78	42	58	65	331	615	102	-21	2	18	23	19	-78	-7
600.37	141	-58	-1024	-700	212	540	173	19	161	-39	-83	75	641	59	944	-23	16	-21	-12	25	-7	15	201	43	-1	-49	-37	-140	-57	14	-211	108	23	-61	-78	79	39	56	57	247	495	76	-24	18	15	24	16	-57	-12
438.21	113	-22	-878	-593	123	441	165	19	167	-41	-71	63	487	54	738	-21	15	-17	-12	22	-6	14	144	47	-1	-49	-31	-112	-47	12	-172	84	16	-51	-80	80	37	54	51	182	418	58	-25	3	13	25	12	-42	-11
316.66	95	5	-747	-498	68	368	159	25	168	-43	-62	52	374	49	589	-16	12	-14	-12	18	-7	11	96	49	-2	-49	-25	-88	-39	10	-136	59	11	-40	-85	80	35	55	45	128	345	43	-28	12	10	28	7	-29	-12
188.51	74	31	-600	-401	25	315	154	25	170	-46	-55	39	276	40	469	-12	8	-12	-11	11	-5	8	61	51	-3	-48	-19	-67	-31	8	-100	38	10	-29	-90	79	33	56	38	84	283	34	-27	5	8	31	5	-16	-9
53.14	59	40	-451	-300	-4	282	148	25	170	-49	-49	28	207	32	389	-7	5	-12	-9	6	-5	5	42	53	-5	-48	-13	-51	-24	8	-74	24	8	-21	-95	77	31	58	31	54	242	27	-29	19	3	33	2	-8	-7
-0.43	49	39	-338	-207	-17	263	145	25	170	-50	-46	21	172	26	348	-5	4	-13	-9	2	-5	3	32	54	-6	-48	-11	-42	-19	8	-60	19	6	-17	-97	77	30	58	28	40	233	24	-28	17	-3	36	2	-2	-4
-0.43	43	44	-285	-162	-21	256	142	25	169	-51	-45	18	156	23	330	-4	3	-13	-8	1	-5	2	29	54	-7	-47	-10	-38	-18	9	-54	14	5	-15	-100	76	29	59	26	33	228	22	-28	6	-4	35	2	0	-5
-0.43	41	50	-256	-140	-22	252	141	25	170	-51	-44	16	148	22	321	-4	2	-13	-8	0	-4	0	27	54	-7	-47	-9	-36	-17	9	-50	13	5	-14	-99	76	29	59	26	28	222	21	-28	8	-2	34	1	3	-4
19.87	36	47	-207	-112	-23	245	140	24	165	-52	-43	13	134	20	307	-4	2	-13	-8	-1	-5	0	24	55	-7	-46	-8	-32	-15	8	-44	14	4	-13	-100	76	29	59	25	20	206	20	-28	5	-6	39	1	6	-5
19.87	36	47	-205	-111	-22	246	140	24	166	-52	-43	13	133	20	306	-4	2	-13	-8	-1	-5	0	24	55	-7	-46	-8	-32	-15	9	-44	12	5	-12	-100	76	29	59	25	20	211	20	-29	9	-3	36	2	9	-6
19.87	35	47	-204	-111	-21	244	139	24	167	-52	-43	12	133	20	306	-4	2	-13	-8	-1	-5	0	23	55	-7	-45	-8	-32	-15	9	-44	13	5	-12	-100	76	29	59	25	20	211	20	-30	13	-3	36	1	7	-5
40.18	36	48	-203	-111	-20	244	139	24	166	-52	-44	12	133	20	306	-4	2	-13	-8	-1	-5	0	23	54	-7	-45	-8	-32	-15	9	-45	13	5	-12	-100	76	29	59	26	19	212	20	-30	8	-4	37	1	6	-3
46.76	36	50	-203	-111	-20	245	140	24	168	-52	-44	13	133	20	306	-5	2	-12	-8	-1	-6	0	23	55	-7	-45	-8	-32	-15	8	-45	12	4	-12	-100	76	29	59	25	19	212	20	-29	15	-2	37	1	6	-5
60.53	36	49	-207	-112	-18	244	139	24	169	-52	-43	13	135	20	308	-5	2	-13	-8	-1	-5	0	24	55	-7	-45	-8	-33	-16	9	-46	15	6	-13	-100	75	29	59	26	20	205	20	-29	16	-2	37	0	5	-6
73.55	38	53	-215	-118	-16	245	141	24	170	-52	-44	14	138	22	310	-5	2	-12	-8	0	-6	2	24	54	-6	-45	-9	-35	-17	8	-48	15	5	-14	-99	76	29	59	28	21	214	20	-27	7	0	34	2	8	-5
101.14	39	48	-231	-136	-14	247	141	24	170	-52	-44	16	144	22	317	-6	3	-12	-8	1	-6	2	26	54	-6	-44	-10	-38	-18	8	-53	12	6	-16	-98	76	29	58	28	25	220	20	-25	18	0	37	3	4	-5
134.41	43	44	-281	-203	-7	251	143	24	170	-51	-45	21	159	25	333	-8	3	-12	-9	3	-7	4	28	53	-5	-45	-13	-45	-21	7	-65	18	7	-20	-95	77	31	57	30	35	232	21	-25	6	2	36	3	-3	-3
195.26	50	38	-359	-288	3	260	147	25	172	-51	-45	26	183	30	357	-11	4	-12	-10	7	-7	6	32	51	-4	-44	-17	-54	-27	6	-81	24	7	-26	-92	77	32	56	34	47	240	24	-23	8	2	36	3	-5	-5
243.05	56	37	-431	-344	13	269	148	25	173	-50	-46	32	207	33	382	-15	4	-12	-10	10	-9	7	37	51	-4	-45	-21	-64	-31	6	-97	27	8	-31	-89	78	33	54	38	59	250	27	-24	8	6	35	4	-8	-7
324.11	63	23	-513	-400	28	281	150	25	173	-49	-47	38	239	36	415	-18	4	-12	-11	12	-9	8	44	49	-3	-45	-24	-73	-35	6	-113	33	9	-35	-87	78	34	53	40	71	275	30	-22	11	4	30	6	-17	-7
391.34	69	32	-585	-447	45	296	152	24	173	-48	-49	43	277	39	456	-22	5	-12	-11	16	-12	10	52	48	-4	-44	-27	-84	-40	6	-131	33	6	-41	-84	78	36	51	44	88	287	37	-21	12	18	26	6	-21	-6
472.55	77	8	-657	-491	63	313	155	23	171	-47	-52	48	318	42	505	-27	6	-13	-12	18	-13	11	62	47	-4	-45	-30	-94	-44	6	-147	48	11	-45	-82	79	37	50	47	105	316	43	-21	16	15	34	11	-25	-4
553.55	85	-13	-732	-538	86	336	157	20	170	-45	-56	54	373	45	575	-33	6	-14	-12	19	-15	13	79	45	-5	-45	-34	-108	-49	7	-169	53	13	-53	-80	78	38	48	51	131	344	53	-22	6	12	34	11	-34	-7
627.37	94	-23	-799	-577	112	356	160	19	170	-43	-60	59	425	48	646	-36	7	-15	-12	20	-15	13	95	44	-5	-44	-37	-120	-53	8	-184	63	16	-56	-80	78	39	48	54	152	373	62	-24	14	14	27	13	-41	-7
735.97	105	-35	-882	-631	150	389	165	17	168	-42	-69	65	508	51	758	-40	7	-18	-11	21	-15	14	126	43	-7	-44	-40	-136	-58	10	-208	81	20	-62	-76	78	41	50	59	190	418	76	-23	3	17	25	15	-46	-5
823.55	114	-53	-946	-672	185	426	167	14	166	-42	-76	70	583	54	857	-42	8	-19	-11	21	-15	15	154	41	-8	-44	-43	-150	-64	11	-228	95	24	-68	-76	77	42	51	63	224	483	87	-22	4	15	24	17	-56	-5
911.14	126	-63	-1009	-712	229	468	170	12	166	-41	-82	75	667	56	963	-42	8	-23	-10	22	-14	15	179	40	-10	-44	-47	-164	-69	12	-247	109	28	-73	-75	76	43	53	66	256	532	98	-21	9	19	24	17	-60	-7
979.18	135	-77	-1052	-743	266	498	174	10	164	-41	-86	79	728	58	1044	-43	9	-24	-9	22	-14	16	197	39	-10	-44	-49	-174	-72	13	-261	117	31	-77	-73	76	44	54	68	282	577	106	-20	15	18	24	19	-69	-5
1066.77	147	-90	-1112	-784	320	540	176	8	164	-41	-92	84	825	60	1170	-43	10	-26	-9	22	-13	16	223	37	-11	-44	-52	-192	-78	14	-283	134	35	-83	-73	75	46	55	72	322	648	120	-18	2	18	24	20	-75	-3
1160.89	162	-104	-1168	-825	380	582	179	6	163	-40	-97	92	923	63	1298	-42	11	-28	-8	23	-12	17	246	36	-10	-43	-56	-207	-83	15	-304	148	37	-89	-70	75	46	56	76	360	716	132	-18	15	20	23	23	-81	-7
1282.5	179	-122	-1237	-878	461	631	182	3	162	-39	-102	100	1049	67	1458	-42	12	-30	-8	24	-11	18	272	34	-10	-42	-60	-228	-91	17	-331	167	44	-97	-69	74	47	59	80	410	803	150	-17	3	24	21	27	-92	-6
1505.3	210	-166	-1352	-967	619	712	189	-4	157	-37	-109	116	1264	74	1729	-41	13	-33	-7	27	-8	19	311	30	-10	-42	-66	-263	-102	20	-373	192	51	-110	-64	73	50	62	88	484	935	180	-14	2	26	17	26	-111	-7
1600.07	225	-179	-1398	-1004	682	742	192	-6	156	-36	-112	121	1347	78	1836	-40	13	-35	-7	27	-7	20	325	29	-11	-42	-70	-276	-106	21	-390	200	55	-116	-64	73	50	63	90	513	996	196	-15	15	30	17	29	-117	-6
1681.18	238	-194	-1439	-1038	745	772	195	-8	155	-36	-116	126	1422	80	1932	-37	13	-36	-6	27	-6	20	338	28	-11	-42	-72	-285	-109	22	-400	210	57	-119	-63	72	51	64	91	534	1028	209	-20	2	33	17	33	-125	-3
1687.66	242	-203	-1447	-1044	751	782	194	-8	156	-36	-116	127	1427	80	1941	-35	13	-36	-7	27	-6	20	341	28	-11	-42	-71	-285	-109	22	-400	212	58	-119	-63	72	51	65	92	539	1036	210	-18	3	28	14	30	-128	-5
1681.18	243	-201	-1448	-1045	750	784	194	-8	156	-36	-117	127	1428	80	1943	-33	13	-36	-6	28	-6	21	342	29	-11	-42	-71	-285	-109	22	-400	212	58	-119	-63	72	51	65	92	542	1040	211	-17	15	30	15	35	-127	0
1687.61	244	-202	-1450	-1045	748	786	195	-8	157	-36	-117	127	1429	80	1945	-33	13	-36	-6	28	-6	20	343	28	-11	-43	-71	-285	-109	22	-400	215	58	-118	-62	72	52	65	92	544	1043	212	-16	1	30	15	30	-126	-7
1694.2	245	-205	-1454	-1049	751	789	195	-9	158	-36	-117	129	1435	80	1954	-32	13	-36	-6	28	-6	21	345	28	-11	-43	-71	-285	-109	22	-401	217	59	-119	-62	72	51	65	93	548	1049	213	-15	2	28	14	30	-126	-6
1694.2	246	-201	-1456	-1052	753	791	195	-8	157	-36	-117	129	1439	81	1959	-31	13	-36	-6	28	-5	20	346	28	-11	-44	-71	-286	-109	22	-402	216	59	-119	-63	71	52	65	92	550	1052	215	-15	2	31	14	31	-129	-6
1687.61	247	-203	-1457	-1052	753	793	196	-9	157	-36	-117	129	1440	80	1960	-30	13	-36	-6	28	-6	20	346	28	-11	-44	-71	-286	-109	23	-402	216	58	-119	-63	72	51	65	92	551	1051	214	-15	3	30	13	33	-127	-3
1681.18	247	-204	-1457	-1052	753	793	197	-8	157	-36	-117	130	1440	81	1961	-30	13	-36	-6	28	-5	21	347	28	-11	-44	-71	-286	-109	23	-402	216	59	-119	-63	72	51	66	92	553	1052	215	-15	3	30	15	31	-126	-5
1667.41	248	-205	-1458	-1052	749	794	196	-8	156	-36	-117	130	1440	81	1962	-29	13	-36	-6	28	-6	21	347	29	-11	-44	-71	-286	-110	22	-402	216	58	-119	-63	72	51	66	92	553	1054	215	-15	4	30	14	32	-126	-6
1653.7	248	-202	-1459	-1053	747	796	196	-8	154	-36	-117	130	1440	80	1962	-28	13	-38	-6	28	-5	21	348	28	-11	-44	-71	-285	-110	22	-402	217	60	-119	-63	72	51	66	92	556	1054	215	-15	3	29	16	32	-126	-4
1687.61	249	-202	-1460	-1054	748	797	195	-8	155	-36	-117	131	1442	81	1966	-28	13	-38	-6	28	-6	21	349	28	-12	-44	-71	-286	-109	22	-402	218	58	-119	-64	72	51	66	92	557	1055	215	-15	3	30	14	32	-129	-5
1728.22	253	-211	-1475	-1068	775	807	196	-10	155	-35	-118	133	1479	82	2012	-27	13	-38	-6	29	-5	21	354	28	-12	-44	-74	-293	-112	24	-411	221	61	-122	-63	72	52	66	94	575	1091	230	-15	3	31	12	39	-128	-7
1775.2	264	-220	-1494	-1085	825	827	199	-11	154	-35	-119	139	1532	83	2088	-23	14	-40	-6	30	-5	22	364	27	-11	-43	-75	-301	-114	24	-419	230	64	-125	-61	71	52	68	95	592	1135	248	-14	4	32	10	35	-135	-3
1775.2	272	-225	-1499	-1089	844	842	198	-11	154	-35	-119	141	1542	83	2108	-18	14	-39	-6	29	-5	22	370	27	-11	-44	-75	-302	-114	25	-418	234	65	-125	-61	71	52	69	95	596	1142	250	-11	4	29	13	34	-133	-4
1768.82	275	-222	-1499	-1089	844	845	199	-11	154	-35	-119	141	1542	83	2113	-15	14	-39	-5	30	-6	21	372	27	-10	-44	-75	-300	-114	25	-418	239	65	-124	-62	71	53	69	95	599	1151	251	-13	5	31	13	33	-136	-4
1762.18	277	-219	-1499	-1089	844	848	198	-11	154	-34	-119	141	1542	83	2115	-13	13	-39	-6	30	-6	22	374	27	-11	-44	-75	-300	-114	24	-417	238	66	-124	-62	71	53	69	96	601	1153	251	-12	5	32	13	36	-136	-4
1768.77	306	-224	-1522	-1107	847	880	207	5	153	-32	-117	153	1563	90	2158	10	15	-39	-6	28	-6	21	392	27	-12	-45	-74	-300	-113	23	-418	246	70	-125	-62	71	53	76	99	628	1192	260	2	-1	30	13	33	-137	-4
1768.77	306	-229	-1522	-1108	846	881	207	4	153	-32	-117	153	1564	89	2158	10	16	-39	-6	28	-6	21	393	25	-13	-45	-72	-301	-113	25	-418	248	69	-125	-62	71	53	76	99	629	1194	261	1	7	30	11	30	-137	-7
1762.18	307	-228	-1522	-1107	846	881	207	5	155	-32	-117	153	1564	90	2159	10	15	-39	-6	28	-6	21	393	27	-13	-45	-74	-300	-113	25	-418	249	70	-125	-62	71	53	76	98	629	1192	261	0	14	30	11	32	-137	-6
1734.64	306	-229	-1522	-1107	845	880	207	5	154	-32	-117	153	1562	90	2156	10	15	-39	-6	28	-6	21	392	27	-12	-46	-72	-299	-113	25	-417	250	71	-124	-63	71	53	76	98	627	1195	260	-1	3	30	12	33	-136	-5
1573.18	304	-227	-1516	-1102	837	878	206	5	155	-32	-117	152	1551	89	2143	10	16	-39	-6	28	-6	21	390	28	-13	-46	-71	-295	-112	25	-411	247	70	-123	-64	71	53	77	96	620	1171	257	-1	2	29	14	30	-136	-4
1464.7	294	-205	-1482	-1068	777	860	203	7	158	-33	-115	145	1464	86	2034	11	16	-36	-7	28	-7	20	379	29	-11	-46	-66	-275	-104	23	-384	238	66	-114	-66	72	50	75	91	582	1087	236	-3	14	29	14	30	-128	-3
1228.66	264	-163	-1394	-985	619	811	196	12	161	-35	-111	132	1274	81	1801	9	17	-33	-8	28	-9	19	359	33	-9	-47	-59	-244	-93	21	-345	221	58	-101	-68	73	48	72	84	520	976	200	-4	4	26	14	25	-111	-6
1012.23	233	-126	-1294	-895	465	751	189	17	165	-36	-104	119	1071	75	1534	7	19	-29	-10	28	-11	19	332	37	-6	-48	-51	-208	-80	20	-301	197	48	-88	-70	75	45	68	75	435	830	154	-8	3	23	17	22	-94	-7
782.84	194	-88	-1163	-786	308	659	181	23	168	-37	-93	103	838	71	1220	0	20	-24	-12	28	-12	18	288	40	-3	-49	-43	-171	-67	18	-253	166	38	-74	-74	76	43	64	67	335	669	108	-10	5	19	20	17	-74	-9
620.62	166	-58	-1050	-698	201	563	175	29	172	-38	-82	92	671	67	991	-3	20	-20	-13	27	-13	17	234	43	0	-49	-36	-143	-57	16	-216	142	29	-64	-76	78	41	62	60	257	549	75	-14	16	17	28	15	-64	-9
458.51	137	-26	-919	-603	117	456	168	32	176	-40	-70	77	518	62	784	-5	18	-17	-13	24	-13	15	164	45	0	-50	-30	-115	-47	13	-175	109	22	-53	-80	78	38	60	52	177	448	46	-16	2	15	24	12	-47	-9
323.89	113	2	-780	-507	53	376	161	35	179	-43	-60	64	392	53	622	-6	14	-14	-13	17	-12	12	109	48	-1	-49	-25	-90	-39	11	-139	79	15	-41	-84	77	36	60	45	120	371	31	-19	6	11	27	9	-34	-9
215.3	92	25	-638	-419	10	325	154	35	181	-46	-53	51	299	45	509	-4	12	-13	-11	12	-11	9	74	50	-4	-49	-19	-70	-31	10	-106	55	9	-31	-91	76	34	61	37	73	315	18	-20	13	8	29	6	-21	-8
93.69	73	35	-495	-327	-20	292	150	35	182	-49	-48	38	230	37	427	-2	9	-13	-10	7	-10	5	53	52	-5	-49	-14	-54	-25	10	-79	36	11	-24	-95	75	32	62	33	44	275	10	-23	6	3	33	3	-12	-6
13.45	61	23	-371	-232	-37	272	146	35	182	-51	-45	30	188	31	378	0	7	-13	-9	2	-10	3	41	53	-7	-48	-10	-43	-20	10	-62	22	5	-19	-97	74	30	63	29	26	253	5	-24	8	-5	35	2	-4	-5
-0.43	56	44	-308	-179	-42	262	145	34	183	-51	-43	26	171	28	359	1	6	-13	-9	1	-10	2	37	53	-7	-47	-9	-39	-18	9	-54	23	10	-17	-99	74	30	63	27	17	241	3	-26	19	0	34	1	-1	-5
-0.43	52	47	-269	-150	-44	257	143	34	184	-52	-43	23	159	26	346	1	7	-13	-8	0	-10	2	34	54	-7	-47	-8	-36	-17	10	-49	22	9	-15	-101	74	29	63	25	11	235	2	-27	6	0	34	2	2	-6
-0.43	50	47	-248	-138	-44	255	143	34	184	-52	-43	22	153	25	340	1	7	-13	-8	-1	-10	1	33	54	-7	-47	-8	-34	-16	10	-47	21	8	-14	-101	74	29	64	25	8	235	2	-28	8	-2	36	1	4	-5
6.16	48	47	-221	-123	-44	251	142	34	181	-52	-42	20	147	24	333	1	6	-13	-8	-2	-10	0	31	54	-8	-46	-7	-32	-15	10	-45	22	8	-13	-101	73	29	63	26	4	231	1	-29	8	-3	36	1	6	-2
32.99	47	47	-219	-122	-43	250	141	33	183	-53	-42	20	146	24	333	1	6	-13	-8	-1	-10	0	31	54	-8	-46	-7	-32	-15	10	-44	20	8	-13	-101	74	29	64	25	4	229	1	-30	7	-2	36	1	5	-3
40.18	48	45	-218	-122	-41	250	141	33	183	-52	-42	20	146	24	333	1	7	-13	-8	-1	-10	0	31	54	-7	-45	-7	-32	-15	10	-44	20	7	-13	-101	73	30	63	25	3	224	1	-30	18	-4	35	2	4	-3
66.96	48	45	-223	-125	-40	250	141	33	183	-52	-43	20	148	24	334	1	7	-12	-8	-1	-10	1	31	54	-7	-45	-8	-34	-15	10	-45	22	8	-14	-101	74	29	63	26	4	233	1	-30	6	-4	35	2	3	-4
87.21	48	43	-237	-136	-37	250	141	33	183	-52	-43	22	153	25	339	0	7	-13	-8	0	-10	2	32	54	-7	-45	-8	-36	-17	10	-50	22	8	-15	-100	74	30	63	27	7	237	1	-30	8	-3	36	0	3	-6
107.57	51	40	-264	-169	-32	254	144	33	186	-52	-43	24	161	28	348	-1	7	-13	-9	2	-11	3	34	53	-7	-45	-10	-41	-19	9	-58	24	15	-18	-98	74	31	62	29	14	239	2	-28	11	-2	34	1	2	-6
168.43	57	37	-340	-266	-22	262	146	34	185	-51	-44	31	186	32	374	-5	7	-12	-10	6	-11	5	39	52	-5	-46	-16	-52	-25	8	-77	31	6	-25	-94	75	32	60	34	29	261	5	-27	17	1	34	3	-6	-5
290.03	71	26	-504	-396	2	283	152	33	187	-50	-46	44	248	39	439	-12	8	-12	-11	13	-14	9	52	48	-4	-45	-24	-75	-36	7	-118	41	11	-37	-86	76	35	56	44	62	292	14	-27	3	4	32	6	-18	-7
452.25	89	-10	-665	-492	38	315	156	33	189	-47	-50	55	322	44	522	-20	8	-12	-12	17	-17	11	68	46	-4	-45	-29	-92	-43	7	-144	53	15	-44	-82	77	37	54	49	87	322	24	-25	14	4	35	21	-25	-8
505.71	94	-6	-724	-525	54	330	158	32	188	-46	-52	58	353	47	556	-22	8	-13	-12	18	-17	12	76	46	-5	-45	-31	-98	-45	8	-154	55	15	-49	-82	76	37	53	50	100	335	30	-26	2	10	28	12	-32	-2
555.93	99	-16	-766	-552	68	343	160	30	188	-45	-55	62	385	49	600	-25	9	-14	-12	20	-18	13	86	45	-5	-45	-33	-107	-48	8	-166	64	17	-52	-80	77	38	52	53	116	356	37	-26	5	9	30	7	-34	-10
600.53	105	-20	-806	-574	82	356	161	30	186	-44	-57	64	415	50	638	-26	9	-14	-12	20	-18	13	96	44	-5	-45	-35	-115	-50	9	-176	66	17	-54	-79	77	39	52	55	132	379	45	-25	13	12	27	13	-38	-6
654.97	111	-33	-851	-602	101	372	163	28	187	-44	-62	68	456	52	695	-29	10	-16	-12	20	-18	14	111	44	-6	-44	-37	-123	-54	10	-189	75	22	-58	-78	76	40	52	57	152	402	55	-24	4	11	25	11	-46	-6
702	118	-41	-888	-624	118	387	164	28	184	-42	-65	71	489	53	741	-29	10	-16	-11	21	-19	14	124	43	-6	-45	-38	-129	-55	10	-197	82	22	-60	-78	76	41	52	58	166	413	63	-26	14	11	25	13	-48	-8
728.73	121	-39	-916	-639	130	399	165	27	185	-43	-68	73	514	54	774	-30	10	-17	-11	21	-19	15	134	43	-7	-45	-39	-134	-57	11	-204	88	22	-62	-78	76	41	53	59	179	434	69	-24	1	16	25	14	-50	-6
776.52	128	-48	-951	-662	151	422	167	25	183	-42	-72	76	559	55	836	-30	10	-19	-11	21	-18	15	152	42	-8	-45	-41	-142	-60	11	-217	99	27	-65	-76	76	41	53	62	201	468	81	-24	15	15	24	16	-54	-6
843.86	137	-60	-1000	-693	181	458	170	24	182	-42	-78	80	620	57	921	-30	11	-21	-10	22	-18	15	176	41	-9	-44	-43	-154	-64	13	-233	115	29	-69	-76	76	43	55	65	232	518	96	-23	4	16	25	14	-58	-5
904.55	150	-66	-1044	-721	215	491	172	22	182	-42	-82	84	682	59	1004	-28	11	-23	-10	22	-17	16	198	40	-10	-44	-45	-164	-68	14	-247	125	31	-73	-76	74	44	55	67	260	569	108	-23	1	18	22	15	-64	-8
979.18	160	-79	-1093	-755	259	530	174	20	180	-42	-88	89	757	61	1104	-26	11	-24	-10	22	-17	16	222	39	-11	-44	-47	-176	-72	14	-262	143	35	-77	-75	74	44	57	70	292	627	123	-21	4	18	22	17	-70	-4
1046.41	172	-87	-1138	-786	301	565	177	18	179	-41	-92	96	829	63	1201	-24	12	-25	-9	21	-16	16	245	38	-11	-44	-50	-188	-76	15	-278	156	38	-81	-74	73	46	58	72	324	683	137	-20	16	21	23	20	-75	-3
1140.53	185	-104	-1189	-823	356	608	179	15	177	-41	-98	101	917	65	1317	-21	13	-28	-8	22	-15	17	267	36	-12	-44	-53	-202	-81	16	-294	170	43	-86	-73	73	46	59	75	362	744	153	-18	1	19	21	17	-83	-6
1201.28	197	-115	-1228	-852	402	640	182	14	177	-41	-101	107	987	67	1409	-18	13	-29	-8	22	-15	17	284	36	-12	-44	-55	-213	-84	17	-310	182	45	-90	-71	72	47	61	78	393	796	168	-17	2	20	18	21	-86	-8
1275.86	211	-129	-1269	-883	458	678	184	12	174	-40	-104	113	1069	70	1519	-15	14	-30	-8	24	-14	18	303	33	-11	-44	-58	-225	-89	18	-325	195	49	-95	-69	72	47	62	82	428	859	183	-15	17	23	18	24	-96	-7
1343.2	226	-142	-1305	-910	512	709	187	10	175	-39	-106	120	1140	72	1612	-12	15	-31	-8	25	-13	18	319	32	-10	-44	-60	-237	-93	19	-338	204	53	-99	-69	72	48	64	83	456	912	195	-16	14	23	19	23	-99	-4
1411.18	237	-155	-1340	-939	565	738	188	8	175	-38	-108	124	1209	74	1703	-10	16	-32	-8	26	-13	19	332	32	-10	-44	-62	-247	-96	20	-352	217	56	-105	-68	72	48	65	85	488	955	208	-15	3	24	16	22	-104	-6
1472.09	250	-161	-1371	-965	617	764	191	7	174	-38	-110	130	1276	77	1789	-7	17	-34	-7	27	-12	20	346	30	-10	-43	-65	-259	-99	21	-365	225	57	-109	-66	71	50	67	88	515	1007	222	-15	9	28	13	28	-110	-6
1545.8	262	-183	-1407	-994	675	794	193	5	173	-37	-112	135	1349	80	1885	-5	16	-35	-7	28	-11	20	359	30	-10	-43	-67	-270	-103	22	-379	233	61	-113	-65	71	50	68	90	544	1056	235	-14	15	26	13	28	-118	-6
1620.38	275	-199	-1441	-1023	735	821	195	2	173	-36	-114	141	1419	82	1975	-2	16	-38	-7	28	-11	21	371	29	-10	-44	-69	-280	-106	23	-391	241	64	-117	-65	70	51	69	92	570	1104	247	-13	4	26	14	31	-125	-5
1653.7	283	-203	-1459	-1039	763	835	196	1	171	-35	-116	144	1452	83	2018	0	16	-38	-7	28	-10	21	377	28	-10	-43	-70	-284	-108	23	-397	246	66	-119	-64	70	51	70	93	584	1121	253	-13	12	28	11	28	-125	-6
1681.18	289	-205	-1471	-1050	780	845	197	1	172	-36	-117	145	1472	84	2044	2	16	-38	-6	28	-10	20	381	28	-11	-44	-70	-287	-109	23	-400	247	66	-120	-64	70	51	71	93	592	1135	257	-13	12	31	13	32	-127	-4
1694.14	291	-217	-1480	-1056	791	851	197	0	172	-35	-117	147	1484	84	2060	2	15	-39	-7	28	-10	21	384	27	-11	-44	-71	-289	-110	23	-402	249	67	-120	-64	70	52	71	94	599	1142	259	-13	1	26	12	28	-132	-6
1701.43	293	-213	-1485	-1060	797	855	197	0	172	-36	-118	147	1492	84	2071	3	15	-38	-6	28	-10	21	385	28	-11	-44	-71	-290	-110	23	-404	250	67	-121	-64	70	51	71	94	603	1149	260	-13	10	28	12	29	-130	-5
1707.91	294	-216	-1489	-1064	802	859	197	0	172	-36	-118	148	1500	84	2082	3	15	-39	-6	28	-9	21	387	28	-11	-44	-72	-291	-110	23	-405	252	68	-121	-65	70	52	71	94	607	1157	263	-13	0	28	11	30	-133	-6
1714.39	296	-217	-1493	-1068	808	863	197	0	172	-35	-119	148	1506	84	2091	3	15	-39	-6	28	-10	20	388	27	-12	-44	-72	-292	-111	23	-407	252	68	-121	-65	70	52	71	94	611	1161	265	-13	11	28	12	29	-132	-7
1721.79	296	-222	-1497	-1070	811	865	197	-1	171	-36	-119	149	1510	84	2098	4	15	-39	-6	28	-10	21	390	27	-12	-44	-72	-292	-111	23	-408	254	68	-122	-64	70	52	71	94	613	1164	266	-14	0	27	11	28	-134	-9
1714.39	297	-220	-1497	-1071	811	866	197	0	172	-36	-119	149	1512	85	2099	4	15	-39	-6	28	-10	20	390	27	-12	-44	-72	-293	-111	23	-407	254	68	-122	-65	70	52	71	94	615	1165	266	-13	8	27	12	28	-131	-5
1707.91	296	-216	-1499	-1071	810	867	197	0	172	-36	-119	149	1512	84	2100	4	15	-39	-6	28	-10	20	391	27	-12	-44	-72	-293	-111	23	-407	254	68	-122	-66	69	52	71	93	616	1166	265	-13	2	30	13	31	-133	-7
1701.43	297	-220	-1499	-1072	810	868	197	0	171	-36	-119	150	1512	85	2100	5	15	-39	-6	28	-10	21	391	28	-12	-44	-72	-293	-111	23	-407	254	69	-122	-65	70	52	72	94	617	1169	266	-13	3	27	13	30	-136	-4
1701.49	298	-217	-1499	-1072	809	869	197	0	172	-36	-119	150	1511	85	2100	5	15	-39	-6	28	-10	21	391	27	-12	-44	-71	-293	-111	23	-407	253	69	-121	-65	70	52	71	95	617	1165	266	-14	14	30	12	30	-133	-5
1694.14	297	-219	-1500	-1072	808	869	197	-1	172	-36	-119	150	1511	84	2100	5	15	-39	-6	28	-10	21	391	27	-12	-45	-72	-292	-111	23	-407	254	68	-122	-65	70	52	71	94	618	1167	265	-14	3	28	13	30	-132	-7
1687.61	297	-214	-1500	-1073	807	869	197	0	171	-36	-119	150	1511	84	2100	5	15	-39	-7	28	-10	20	392	27	-12	-44	-72	-292	-111	23	-407	252	69	-122	-65	69	51	71	95	618	1168	265	-14	1	30	11	29	-132	-4
1707.91	297	-221	-1502	-1073	807	870	196	0	171	-36	-120	150	1511	84	2101	5	15	-39	-6	28	-10	20	393	27	-13	-45	-72	-293	-111	23	-407	254	68	-122	-66	69	51	71	94	619	1167	265	-14	4	28	13	31	-131	-9
1701.49	297	-222	-1501	-1074	807	871	197	0	171	-36	-119	150	1512	84	2101	5	14	-40	-6	28	-10	20	392	27	-12	-45	-72	-293	-111	23	-407	255	69	-121	-66	69	52	71	94	619	1166	265	-14	3	26	12	29	-131	-3
1701.43	298	-218	-1501	-1074	806	871	196	0	171	-36	-119	150	1512	85	2101	5	14	-40	-6	27	-10	20	392	27	-12	-45	-72	-293	-111	22	-407	254	69	-122	-64	69	51	71	95	619	1169	265	-14	5	30	12	29	-134	-6
1694.14	297	-217	-1502	-1075	804	871	196	0	172	-36	-120	150	1511	84	2101	7	15	-40	-6	27	-10	20	393	27	-13	-45	-72	-293	-111	23	-407	253	69	-121	-64	70	51	71	95	620	1170	265	-15	1	30	13	29	-133	-6
1707.86	298	-216	-1504	-1076	807	872	196	0	172	-36	-120	150	1515	84	2106	7	14	-40	-6	27	-10	20	393	27	-13	-45	-72	-294	-112	23	-409	255	68	-122	-64	69	51	71	95	622	1174	266	-13	1	31	11	29	-135	-5
1728.22	300	-219	-1509	-1081	817	876	197	-1	172	-36	-120	152	1527	84	2120	7	14	-40	-6	27	-10	20	395	27	-13	-45	-74	-296	-112	23	-411	258	69	-123	-65	69	52	72	95	626	1181	269	-13	3	31	9	32	-134	-7
1741.93	302	-223	-1514	-1085	826	879	197	-1	173	-36	-120	152	1537	85	2133	7	14	-40	-7	27	-10	20	397	25	-13	-45	-74	-298	-113	23	-414	256	70	-124	-65	69	52	71	95	632	1195	273	-12	3	30	12	31	-134	-3
1762.18	305	-228	-1522	-1092	843	885	197	-2	173	-36	-121	154	1557	86	2161	7	15	-41	-6	27	-10	20	400	25	-13	-45	-75	-302	-114	23	-417	259	71	-125	-65	68	52	72	95	640	1216	279	-10	16	30	12	30	-135	-5
1782.43	309	-231	-1531	-1100	862	893	198	-2	174	-35	-121	155	1576	86	2186	9	14	-41	-6	27	-9	20	403	24	-13	-45	-75	-305	-115	23	-421	263	71	-126	-65	68	52	72	96	647	1226	284	-11	2	30	11	34	-139	-4
1795.5	313	-234	-1538	-1107	880	902	199	-3	174	-35	-122	157	1595	86	2216	11	14	-42	-6	27	-9	20	408	24	-14	-45	-76	-308	-116	24	-424	266	72	-127	-65	68	52	73	96	656	1242	292	-12	13	31	12	33	-140	-6
1815.8	317	-236	-1547	-1117	903	912	199	-3	174	-35	-122	159	1615	87	2246	13	14	-41	-6	27	-8	20	413	24	-13	-45	-77	-310	-117	24	-427	269	75	-128	-64	68	52	74	98	666	1267	299	-12	2	32	10	35	-142	-6
1829.41	320	-231	-1550	-1120	915	922	199	-4	175	-34	-122	161	1623	87	2264	17	15	-42	-6	28	-8	20	419	24	-13	-45	-77	-311	-117	24	-428	272	75	-128	-63	68	52	74	97	670	1279	301	-11	-2	36	10	36	-140	-5
1809.22	359	-226	-1581	-1154	960	979	189	-3	163	-15	-126	178	1676	90	2361	39	16	-42	-6	28	-5	21	458	24	-14	-46	-76	-315	-117	25	-432	291	85	-130	-62	70	56	79	104	716	1350	320	-6	-3	37	10	35	-148	-5
1802.68	360	-231	-1581	-1154	961	979	189	-4	164	-15	-126	178	1676	90	2361	40	16	-42	-6	28	-5	21	458	24	-13	-45	-76	-315	-117	26	-432	292	85	-130	-63	70	57	79	104	716	1352	320	-9	9	38	7	34	-147	-5
1768.77	359	-234	-1581	-1153	960	979	188	-3	165	-16	-127	178	1674	90	2360	40	16	-42	-6	29	-5	21	458	24	-13	-45	-76	-315	-117	26	-431	292	85	-130	-62	70	56	79	104	715	1354	320	-8	-1	36	10	33	-146	-5
1678.64	359	-229	-1578	-1150	954	977	188	-3	166	-15	-126	178	1668	90	2352	40	17	-42	-6	28	-5	21	457	25	-13	-46	-76	-313	-116	26	-427	291	85	-129	-63	70	56	78	103	709	1342	316	-11	2	38	9	31	-144	-6
1600.07	355	-218	-1565	-1134	945	954	192	-2	168	-16	-125	175	1636	89	2313	39	17	-41	-6	28	-6	20	453	25	-13	-46	-74	-306	-113	26	-418	289	83	-126	-64	70	55	78	100	697	1310	309	-13	11	38	9	32	-144	-5
1525.45	345	-211	-1539	-1108	889	939	187	-1	170	-17	-124	170	1576	87	2237	38	17	-40	-7	28	-6	20	446	28	-12	-46	-70	-291	-109	25	-400	282	80	-120	-66	71	53	77	96	662	1240	284	-13	2	34	11	29	-136	-5
1296	316	-168	-1461	-1031	724	888	181	4	174	-18	-121	156	1379	81	1981	34	18	-35	-8	28	-9	19	423	31	-9	-47	-61	-256	-96	23	-355	260	70	-106	-67	72	50	72	89	581	1078	230	-16	12	32	13	25	-120	-5
1052.84	275	-126	-1359	-935	538	816	175	10	179	-20	-114	140	1160	77	1683	27	19	-31	-11	29	-12	19	393	35	-6	-48	-53	-220	-84	22	-313	235	61	-92	-70	75	48	68	81	486	917	178	-20	-1	28	14	23	-99	-9
829.82	234	-85	-1240	-830	365	716	168	16	183	-21	-103	123	922	72	1348	16	21	-27	-13	30	-15	19	344	39	-2	-49	-44	-180	-70	20	-262	199	47	-77	-72	76	46	63	74	366	724	143	-24	14	25	18	16	-82	-10
600.37	187	-51	-1091	-714	209	566	160	22	189	-25	-88	104	690	67	1023	4	20	-22	-14	28	-17	18	256	42	1	-50	-36	-143	-56	17	-213	159	34	-63	-76	78	43	60	64	249	548	76	-28	1	19	20	11	-64	-10
397.66	143	-3	-915	-589	89	418	151	26	198	-30	-72	81	481	57	742	-4	13	-17	-13	21	-17	14	155	46	-2	-50	-28	-106	-44	13	-159	104	24	-49	-82	77	40	58	53	147	384	36	-32	11	17	21	11	-45	-10
235.6	107	34	-721	-468	13	331	142	29	199	-36	-60	61	330	45	558	-6	7	-14	-11	12	-16	9	93	49	-4	-50	-20	-75	-33	10	-113	59	17	-33	-89	76	36	60	43	75	332	12	-34	10	10	27	5	-27	-10
73.33	80	47	-521	-344	-31	282	136	30	201	-40	-53	43	231	35	441	-3	3	-13	-10	5	-14	5	61	52	-6	-49	-13	-53	-24	10	-76	37	13	-22	-93	74	33	61	36	35	276	2	-36	5	3	30	3	-14	-10
6.05	68	54	-387	-241	-46	260	132	30	201	-41	-48	35	192	29	396	-2	2	-13	-9	2	-14	3	50	53	-7	-48	-10	-44	-20	10	-61	27	13	-18	-95	73	33	62	33	18	250	-3	-37	13	2	32	-1	-9	-7
-0.54	62	58	-325	-191	-50	251	131	30	200	-41	-47	31	177	25	378	-1	1	-13	-8	1	-13	2	45	53	-8	-48	-9	-40	-18	10	-54	25	11	-16	-96	72	32	63	31	10	265	-5	-37	17	2	32	0	-4	-7
-0.49	58	55	-286	-164	-52	246	130	29	201	-42	-47	28	167	24	367	-1	1	-13	-8	-1	-13	2	43	54	-8	-48	-8	-37	-17	10	-50	23	11	-15	-96	73	32	63	30	4	252	-6	-37	14	-3	34	0	-4	-7
-0.49	56	57	-266	-152	-52	244	129	29	201	-42	-47	26	161	23	361	0	1	-13	-8	-1	-13	0	42	54	-8	-47	-8	-36	-16	10	-47	22	11	-14	-97	72	31	63	29	1	244	-6	-37	4	-2	32	-1	1	-7
-0.43	55	57	-249	-143	-51	242	129	29	200	-43	-46	25	157	22	357	-1	0	-13	-8	-2	-13	0	41	54	-8	-47	-7	-35	-16	11	-46	23	10	-14	-97	72	31	63	29	-3	241	-7	-39	17	-4	32	0	-2	-5
-0.43	54	54	-238	-138	-51	241	128	29	200	-43	-46	24	154	22	355	0	1	-13	-8	-1	-13	0	40	54	-8	-46	-7	-34	-15	10	-44	23	9	-13	-98	72	31	63	29	-4	238	-7	-39	14	-5	33	-1	1	-5
-0.43	52	58	-228	-134	-51	239	127	29	200	-43	-46	23	151	21	352	0	1	-13	-8	-2	-13	0	39	54	-9	-46	-7	-33	-15	10	-43	21	11	-13	-97	72	31	63	28	-6	229	-6	-40	3	-4	33	-2	0	-6
-0.43	52	59	-220	-129	-50	239	127	29	201	-43	-46	23	149	21	350	0	1	-13	-8	-2	-13	0	38	54	-8	-46	-6	-32	-15	10	-42	21	10	-13	-98	72	31	63	27	-8	237	-6	-40	4	-4	33	-1	1	-6
1.89	52	59	-212	-126	-49	238	127	29	201	-43	-46	22	147	21	348	0	1	-13	-8	-3	-13	0	38	54	-8	-46	-6	-32	-15	10	-41	21	9	-13	-97	72	30	63	27	-9	237	-7	-40	14	-5	34	-1	3	-5
12.74	51	61	-209	-125	-48	237	127	28	202	-44	-46	22	146	21	347	0	1	-14	-8	-3	-14	0	38	54	-8	-46	-7	-32	-15	10	-41	23	9	-13	-97	74	31	63	27	-10	232	-7	-40	6	-3	32	0	1	-5
32.99	51	57	-209	-125	-47	237	126	29	202	-43	-46	22	147	21	348	0	1	-13	-8	-2	-13	0	38	54	-8	-46	-7	-32	-15	10	-42	23	10	-13	-98	76	30	62	27	-10	231	-8	-40	14	-7	34	-1	1	-5
53.35	52	57	-213	-126	-45	237	126	28	202	-43	-46	23	148	21	349	-1	1	-13	-8	-2	-14	0	38	53	-8	-46	-7	-33	-15	10	-43	23	9	-13	-98	76	31	62	27	-10	236	-8	-39	7	-6	35	0	1	-6
60.48	52	59	-220	-128	-44	237	126	29	203	-43	-46	23	150	22	350	-1	1	-13	-8	-2	-14	0	39	53	-8	-45	-7	-34	-16	10	-45	22	10	-14	-97	76	31	62	27	-9	232	-8	-41	16	-3	33	1	-2	-4
67.01	53	56	-231	-137	-41	238	126	28	203	-43	-47	24	154	22	354	-1	1	-13	-8	-2	-14	0	39	53	-8	-45	-8	-36	-16	10	-47	24	10	-15	-96	76	31	61	28	-8	238	-8	-39	6	-5	31	1	-4	-7
80.84	54	108	-250	-154	-38	239	127	29	204	-43	-47	26	160	24	360	-2	2	-13	-9	0	-14	2	41	53	-8	-45	-9	-38	-18	9	-52	24	11	-16	-95	76	31	61	29	-4	242	-8	-38	6	93	32	0	-3	-6
107.57	58	49	-284	-198	-34	242	128	29	205	-42	-47	29	170	25	370	-4	2	-13	-9	1	-15	3	43	52	-7	-45	-11	-43	-20	9	-60	27	12	-19	-94	76	33	61	31	2	244	-7	-39	19	-4	32	1	-5	-6
148.23	61	48	-339	-266	-26	247	129	29	206	-43	-48	33	185	29	387	-6	2	-13	-10	4	-15	4	45	51	-6	-45	-13	-50	-23	8	-71	33	11	-23	-92	77	33	60	34	9	251	-6	-37	2	-2	31	1	-8	-9
195.26	66	49	-396	-318	-19	254	130	30	208	-42	-48	37	201	30	404	-8	2	-13	-10	6	-16	5	49	50	-6	-45	-16	-56	-27	8	-81	34	12	-26	-90	77	34	59	36	19	269	-4	-35	6	2	30	3	-12	-10
244.35	72	47	-459	-368	-10	261	132	29	209	-41	-48	42	222	34	425	-10	2	-13	-11	9	-16	7	53	49	-5	-45	-19	-64	-30	7	-95	38	13	-31	-87	78	35	57	40	31	277	-1	-35	11	4	29	6	-13	-9
324.81	79	37	-551	-428	6	275	135	28	210	-41	-51	50	261	37	465	-15	3	-13	-11	12	-18	9	61	48	-5	-45	-23	-75	-36	7	-116	45	7	-37	-83	78	36	55	44	47	300	7	-36	5	7	28	4	-22	-9
404.46	90	42	-637	-480	26	291	138	28	211	-39	-53	56	304	41	514	-18	3	-13	-12	15	-19	10	72	46	-5	-45	-27	-88	-41	7	-137	54	16	-43	-80	78	38	53	49	67	315	15	-35	12	14	26	10	-23	-9
492.8	99	7	-725	-531	49	313	140	27	210	-37	-56	62	352	44	568	-23	3	-14	-12	18	-21	12	84	45	-6	-45	-31	-98	-45	7	-153	58	17	-49	-78	78	39	51	52	86	350	25	-34	5	8	25	8	-33	-8
566.68	107	-13	-799	-574	73	336	143	26	208	-35	-61	67	406	47	639	-26	4	-15	-12	19	-21	13	102	44	-7	-45	-34	-113	-50	8	-174	73	20	-54	-75	78	40	50	56	118	385	42	-34	-3	5	20	7	-41	-7
647.62	118	-9	-867	-614	98	359	145	24	207	-34	-66	73	459	49	711	-28	5	-16	-12	20	-21	14	122	43	-7	-45	-36	-124	-54	9	-189	83	22	-58	-75	78	41	49	59	142	420	56	-34	14	16	22	12	-48	-9
702	126	-77	-917	-642	121	380	147	23	207	-33	-71	77	505	51	775	-28	6	-18	-11	20	-21	14	142	42	-8	-45	-38	-133	-57	10	-202	95	25	-61	-74	78	43	50	62	166	448	69	-34	0	15	22	12	-50	-6
756.22	135	-34	-959	-666	140	404	149	21	206	-33	-76	80	547	52	834	-28	6	-19	-11	20	-21	14	159	41	-9	-45	-40	-141	-59	11	-213	105	27	-65	-73	77	43	50	63	187	475	83	-35	14	14	23	13	-56	-7
817.07	146	-40	-1008	-697	169	441	151	19	204	-32	-82	85	609	54	922	-27	7	-22	-11	20	-20	14	186	40	-10	-45	-42	-152	-64	12	-230	121	31	-69	-73	76	44	52	67	222	538	103	-32	1	17	21	13	-60	-7
890.95	158	-54	-1059	-730	209	483	153	17	202	-32	-88	91	680	56	1020	-24	8	-23	-11	20	-20	15	216	39	-11	-45	-44	-164	-68	13	-246	139	35	-73	-72	76	45	53	69	256	592	119	-31	3	16	22	15	-67	-6
971.89	173	-69	-1117	-767	257	530	156	14	200	-31	-94	98	764	59	1138	-20	9	-25	-10	20	-18	15	247	38	-12	-45	-48	-178	-73	14	-263	158	38	-78	-70	75	46	55	73	295	662	137	-28	12	17	21	16	-72	-11
1046.47	187	-55	-1164	-800	302	572	158	13	199	-31	-99	104	838	61	1241	-16	10	-27	-9	20	-17	15	271	36	-13	-44	-50	-191	-77	15	-279	175	43	-82	-70	75	47	56	76	333	731	155	-26	2	91	22	19	-78	-7
1133.95	206	-91	-1216	-839	367	624	162	10	197	-29	-104	113	944	64	1386	-10	11	-29	-9	21	-16	17	304	36	-13	-44	-54	-207	-82	17	-300	197	49	-89	-69	74	48	59	79	387	831	183	-24	7	20	18	19	-88	-10
1255.66	232	-114	-1283	-890	460	691	165	6	195	-28	-111	125	1081	68	1574	-2	13	-32	-9	23	-15	17	342	32	-12	-44	-58	-229	-90	18	-328	222	56	-97	-67	73	49	62	84	454	939	216	-21	1	23	16	23	-98	-6
1383.7	264	-138	-1350	-945	584	763	171	2	192	-25	-116	139	1235	74	1782	9	15	-34	-8	26	-13	19	377	30	-11	-44	-63	-253	-97	20	-356	247	64	-107	-64	72	51	66	89	524	1057	249	-17	15	27	15	24	-110	-7
1539.32	294	-167	-1422	-1006	718	830	175	-1	190	-22	-121	152	1398	80	2000	20	16	-38	-7	27	-11	19	413	28	-11	-43	-68	-280	-106	23	-389	276	72	-118	-61	72	52	71	96	601	1185	290	-13	10	30	11	27	-122	-6
1667.41	323	-196	-1485	-1058	829	885	179	-5	188	-20	-124	163	1501	83	2133	27	17	-40	-7	28	-10	20	430	27	-11	-43	-70	-288	-108	23	-397	281	74	-120	-61	72	53	71	96	622	1205	293	-15	0	33	10	29	-134	-6
1656.5	324	-196	-1487	-1060	825	888	179	-4	190	-20	-124	163	1502	84	2133	28	17	-39	-7	28	-10	20	431	27	-11	-43	-70	-288	-109	23	-398	283	74	-120	-61	72	53	71	96	625	1206	292	-15	11	33	12	28	-131	-6
1640.57	324	-200	-1490	-1063	819	890	179	-5	188	-20	-124	163	1501	83	2132	28	17	-39	-7	28	-10	20	432	27	-11	-44	-71	-288	-109	24	-397	282	75	-120	-62	72	53	71	97	628	1211	291	-15	1	30	12	32	-133	-4
1633.45	324	-193	-1491	-1063	817	891	179	-5	189	-20	-124	164	1501	83	2132	28	17	-40	-7	28	-10	20	432	27	-11	-44	-70	-288	-109	23	-398	283	74	-120	-61	72	53	71	97	630	1211	291	-15	-2	34	12	28	-130	-6
1653.7	324	-209	-1493	-1065	818	893	178	-5	189	-20	-125	164	1507	84	2141	28	17	-40	-7	28	-10	20	434	27	-11	-45	-70	-289	-109	24	-399	283	75	-121	-62	72	54	72	96	633	1218	292	-16	11	27	10	30	-133	-5
1667.41	325	-198	-1498	-1069	822	895	179	-6	189	-20	-125	165	1509	84	2145	28	17	-40	-7	28	-11	20	434	27	-11	-45	-70	-290	-109	23	-401	283	76	-121	-61	71	53	71	97	638	1225	294	-15	15	33	11	28	-132	-5
1694.2	331	-207	-1510	-1080	848	904	180	-6	187	-19	-125	167	1542	85	2188	29	16	-40	-7	28	-9	20	440	25	-11	-44	-72	-297	-112	24	-408	287	76	-123	-62	71	53	72	98	655	1259	305	-15	9	32	8	32	-136	-5
1748.52	340	-219	-1532	-1100	897	924	181	-8	187	-18	-126	172	1595	86	2260	33	17	-42	-7	28	-9	20	449	25	-12	-44	-75	-306	-114	24	-419	294	79	-127	-60	70	54	74	100	679	1308	320	-13	1	33	9	32	-139	-5
1809.32	355	-228	-1556	-1124	954	948	182	-9	186	-17	-128	177	1654	88	2341	38	17	-42	-6	28	-7	21	461	24	-12	-44	-77	-315	-117	25	-430	304	84	-131	-60	70	55	76	102	706	1363	335	-11	11	37	9	32	-141	-6
1863.54	373	-240	-1577	-1145	1017	977	185	-11	183	-15	-130	185	1717	91	2430	47	19	-44	-6	30	-6	21	477	23	-11	-44	-79	-324	-120	27	-439	316	87	-134	-57	70	55	79	105	734	1415	354	-9	0	37	11	31	-146	-4
1896.8	394	-241	-1593	-1161	1062	1004	186	-13	183	-12	-131	193	1753	92	2486	57	19	-44	-6	31	-5	22	489	23	-11	-44	-79	-327	-121	27	-441	322	90	-134	-57	71	55	81	105	746	1433	360	-9	10	43	9	33	-150	-5
1896.75	403	-243	-1596	-1165	1060	1012	186	-13	184	-12	-133	198	1758	92	2495	60	19	-44	-6	30	-5	22	495	23	-11	-45	-79	-328	-121	27	-441	327	90	-134	-58	70	55	81	105	752	1442	360	-4	0	41	7	33	-149	-5
1876.45	412	-243	-1598	-1167	1056	1018	185	-13	182	-12	-133	203	1758	92	2497	62	19	-44	-7	30	-5	21	499	23	-12	-45	-79	-327	-121	28	-440	330	92	-135	-58	71	55	83	105	756	1445	359	-4	0	40	10	34	-150	-3
1876.45	463	-295	-1631	-1208	1092	1079	185	-53	155	8	-129	372	1823	93	2564	91	34	-44	-6	29	-4	21	539	23	-14	-46	-78	-330	-121	32	-447	344	104	-136	-57	70	57	109	108	791	1510	383	23	-1	30	9	35	-147	-4
1876.39	462	-300	-1631	-1208	1091	1079	183	-53	156	8	-130	373	1824	93	2564	91	34	-44	-6	29	-4	22	540	23	-14	-46	-78	-330	-121	33	-447	347	105	-136	-58	70	57	110	108	791	1511	382	22	0	31	9	35	-146	-2
1876.45	463	-297	-1630	-1208	1091	1080	181	-53	157	9	-130	374	1824	94	2564	92	35	-44	-6	29	-3	21	539	23	-14	-46	-78	-330	-121	33	-447	348	105	-135	-59	70	57	109	107	791	1510	383	23	14	32	11	34	-145	-1
1876.45	462	-304	-1631	-1209	1091	1079	180	-54	159	8	-130	374	1824	93	2563	91	35	-44	-6	29	-4	21	539	23	-14	-46	-78	-330	-121	34	-447	349	105	-135	-59	70	57	109	106	791	1512	382	22	11	30	10	36	-148	-2
1815.75	462	-307	-1631	-1208	1089	1079	178	-53	159	9	-130	376	1821	93	2561	91	35	-44	-7	29	-4	21	539	22	-14	-46	-78	-330	-121	34	-446	347	105	-135	-59	70	57	109	106	789	1506	381	22	0	28	9	35	-148	-2
1682.1	459	-299	-1624	-1200	1072	1074	176	-53	159	8	-129	373	1801	92	2533	91	35	-44	-6	29	-4	21	536	23	-14	-46	-77	-324	-119	33	-438	346	103	-132	-59	70	56	109	105	778	1482	373	21	10	28	9	33	-145	-3
1612.98	451	-279	-1600	-1175	1024	1058	173	-50	162	7	-128	366	1742	90	2457	89	34	-42	-6	29	-5	21	529	24	-13	-47	-74	-311	-114	33	-422	338	101	-128	-61	71	55	108	101	754	1424	354	20	6	30	10	36	-139	-2
1478.36	428	-256	-1555	-1129	918	1027	167	-47	165	5	-126	351	1629	86	2307	84	34	-40	-8	29	-6	21	517	27	-11	-47	-68	-291	-107	32	-398	328	94	-120	-62	72	53	106	97	707	1337	319	17	3	29	10	30	-129	-2
1343.03	401	-235	-1504	-1078	799	988	163	-44	167	4	-123	335	1509	83	2145	76	34	-38	-9	30	-8	20	502	29	-9	-48	-63	-272	-101	31	-376	315	87	-113	-64	73	51	103	91	656	1245	281	14	9	24	8	28	-120	-4
1235.25	379	-208	-1455	-1030	702	950	160	-40	170	2	-120	320	1404	81	2002	70	34	-35	-10	31	-10	20	490	31	-7	-48	-59	-256	-95	30	-355	304	83	-107	-66	74	50	100	88	608	1167	249	11	14	25	13	26	-112	2
1133.78	355	-192	-1411	-987	611	910	157	-38	173	1	-117	304	1300	79	1859	63	35	-33	-11	31	-11	20	475	32	-5	-48	-55	-239	-89	29	-336	294	76	-100	-67	75	49	98	84	558	1081	215	9	14	23	14	24	-104	-4
1008.56	324	-170	-1353	-932	508	856	153	-34	177	-1	-112	284	1178	77	1686	54	34	-31	-12	32	-12	20	454	35	-4	-49	-51	-220	-83	28	-313	279	70	-93	-67	75	47	94	80	498	989	180	3	3	23	17	21	-93	-6
918.11	300	-149	-1299	-882	425	803	155	-32	180	-3	-106	267	1072	74	1536	46	34	-29	-13	32	-14	20	430	36	-2	-49	-47	-204	-77	27	-292	260	64	-87	-68	77	47	92	77	443	895	145	-1	14	21	15	19	-87	-8
796.66	269	-127	-1231	-822	330	726	147	-29	183	-6	-99	246	940	72	1347	37	33	-27	-14	32	-16	20	386	38	0	-50	-43	-183	-70	25	-265	237	55	-79	-69	78	46	89	72	369	785	104	-4	10	20	18	17	-77	-7
667.66	238	-103	-1149	-757	238	626	140	-26	187	-9	-89	221	801	69	1148	27	30	-23	-15	30	-18	20	324	40	1	-50	-38	-157	-61	23	-234	205	46	-69	-72	78	44	85	66	283	656	82	-7	1	19	18	16	-69	-9
417.96	177	-54	-977	-627	88	456	131	-20	192	-21	-70	168	539	56	796	12	21	-17	-14	21	-21	14	179	45	-3	-51	-29	-109	-45	16	-164	128	28	-49	-82	77	39	82	51	140	432	24	-13	16	17	23	10	-44	-9
255.74	122	-23	-764	-493	-5	352	122	-17	199	-32	-56	127	371	43	595	8	15	-14	-12	12	-21	9	111	48	-5	-50	-22	-79	-35	13	-120	74	20	-35	-88	76	36	82	42	70	346	4	-13	5	8	28	6	-27	-6
93.58	90	5	-559	-367	-53	301	115	-15	201	-39	-46	98	265	33	475	9	12	-13	-10	5	-20	5	74	50	-7	-50	-14	-56	-25	12	-80	42	16	-24	-94	75	33	84	34	24	287	-11	-17	57	6	29	4	-13	-6
6.05	69	3	-387	-237	-74	275	111	-16	200	-42	-42	80	213	26	417	10	9	-13	-9	1	-19	3	60	52	-8	-49	-10	-45	-20	12	-61	29	14	-19	-97	74	32	84	30	3	268	-16	-18	7	-2	30	2	-6	-6
-0.49	62	6	-321	-185	-78	266	109	-16	200	-43	-39	74	197	23	398	11	9	-13	-9	-1	-19	2	56	52	-9	-48	-9	-41	-18	12	-54	26	13	-16	-98	74	31	85	30	-7	254	-17	-20	17	-1	33	0	-3	-6
-0.43	56	4	-281	-160	-79	261	107	-16	202	-44	-39	70	187	22	387	11	9	-13	-8	-2	-19	0	53	52	-9	-48	-8	-38	-17	12	-50	25	12	-15	-99	73	31	84	28	-13	244	-19	-19	6	-4	33	1	1	-5
-0.49	55	4	-264	-150	-78	259	107	-16	202	-44	-38	68	182	22	383	11	9	-13	-8	-2	-18	0	52	53	-9	-47	-7	-36	-16	12	-48	24	12	-14	-100	74	31	85	27	-16	251	-19	-21	17	-3	33	1	1	-4
-0.43	54	5	-248	-142	-78	258	106	-16	201	-44	-38	67	178	21	378	11	9	-13	-8	-2	-18	1	51	53	-9	-47	-7	-35	-16	12	-46	25	12	-14	-100	73	31	85	27	-18	235	-19	-21	18	-5	33	1	1	-3
-0.43	51	5	-237	-138	-77	256	105	-16	202	-45	-38	65	175	20	375	12	9	-13	-8	-2	-18	0	51	53	-9	-47	-7	-35	-16	12	-45	26	12	-13	-100	73	31	85	27	-20	240	-19	-21	7	-4	34	0	2	-4
19.82	51	8	-229	-135	-73	255	104	-16	200	-45	-37	64	174	21	373	11	9	-13	-8	-2	-18	0	50	53	-9	-47	-7	-34	-15	12	-44	27	12	-13	-100	74	30	85	26	-23	238	-20	-21	6	-4	34	1	2	-4
19.87	51	8	-228	-134	-72	254	104	-16	200	-46	-37	64	174	20	373	11	9	-13	-8	-3	-18	0	50	53	-9	-46	-7	-34	-15	12	-45	28	11	-13	-101	73	31	85	26	-23	236	-20	-21	7	-5	34	1	3	-3
26.41	50	6	-225	-133	-70	253	103	-16	200	-45	-38	64	174	20	373	11	10	-13	-8	-3	-18	0	49	53	-9	-47	-7	-34	-15	13	-45	27	12	-13	-101	73	31	85	26	-24	239	-20	-21	7	-6	34	1	2	-3
46.76	50	7	-227	-134	-68	254	102	-15	201	-45	-37	64	174	21	374	11	10	-13	-8	-2	-18	0	51	52	-8	-46	-7	-35	-16	12	-45	26	11	-14	-100	73	30	85	27	-24	236	-20	-21	7	-4	32	1	2	-5
73.49	50	12	-235	-139	-66	254	102	-16	202	-45	-37	65	177	21	377	11	10	-13	-8	-2	-18	1	51	53	-8	-46	-8	-36	-16	13	-48	29	12	-15	-101	74	31	84	28	-22	241	-20	-22	7	-2	33	-1	3	-5
107.57	52	5	-263	-167	-61	256	104	-13	202	-45	-38	68	187	23	386	10	10	-13	-9	0	-18	2	52	52	-8	-46	-9	-41	-19	12	-56	29	13	-18	-98	73	32	83	30	-16	249	-19	-21	7	-3	31	0	-3	-5
148.18	59	-3	-331	-255	-52	263	108	-12	203	-44	-38	74	207	28	409	8	11	-12	-10	3	-19	4	57	51	-7	-46	-13	-52	-24	11	-75	37	14	-25	-94	75	33	82	35	-1	271	-14	-20	14	-1	34	4	-2	-5
257.42	72	-4	-484	-395	-31	281	114	-13	206	-44	-40	87	264	35	469	0	11	-12	-11	11	-21	8	70	48	-5	-46	-22	-74	-34	9	-115	48	16	-37	-87	76	36	76	43	33	310	6	-18	5	4	30	5	-15	-5
452.25	93	-31	-705	-528	12	321	118	-15	205	-40	-46	105	361	43	574	-8	12	-13	-12	17	-24	11	93	44	-6	-45	-30	-97	-44	10	-152	62	20	-49	-81	76	38	73	51	70	359	33	-17	13	8	27	9	-31	-6
566.62	109	-52	-822	-596	49	355	120	-17	203	-37	-53	117	435	47	668	-12	13	-15	-12	19	-24	13	118	42	-7	-45	-34	-116	-50	11	-178	79	24	-56	-78	76	40	70	55	108	407	47	-15	13	11	25	11	-40	-7
675.16	125	-63	-919	-652	86	390	122	-20	201	-35	-61	128	512	50	774	-14	14	-17	-12	19	-24	14	150	41	-9	-46	-38	-132	-56	13	-201	102	28	-62	-77	76	41	70	61	154	471	76	-17	1	16	23	10	-47	-8
796.82	150	-83	-1019	-712	144	457	127	-23	197	-33	-73	147	631	54	945	-10	16	-21	-11	20	-22	14	211	39	-11	-45	-42	-155	-64	16	-233	140	37	-69	-76	75	44	73	67	219	567	112	-16	2	18	22	13	-57	-7
924.8	178	-110	-1114	-772	216	535	131	-27	193	-30	-85	170	763	58	1132	-2	20	-24	-10	19	-18	15	269	37	-13	-45	-47	-177	-72	17	-263	176	45	-78	-74	74	46	76	73	291	705	154	-10	13	18	21	17	-67	-7
1107.22	224	-133	-1227	-855	337	646	138	-33	189	-26	-99	209	960	64	1405	15	24	-29	-9	20	-15	16	342	35	-13	-44	-53	-208	-81	21	-300	225	57	-89	-72	72	47	81	79	390	876	204	-3	-2	21	19	19	-81	-9
1269.38	274	-168	-1316	-925	474	749	143	-38	185	-19	-109	247	1147	69	1659	30	27	-32	-9	24	-13	17	395	32	-12	-44	-58	-233	-91	23	-332	261	67	-99	-69	72	49	86	85	475	1007	246	0	-1	21	18	24	-90	-4
1391.04	311	-195	-1379	-978	585	817	147	-41	182	-15	-115	272	1280	73	1839	42	28	-34	-9	24	-12	18	429	30	-13	-44	-62	-253	-96	25	-353	283	72	-107	-67	71	50	90	89	536	1107	275	4	4	21	15	26	-105	-2
1485.05	339	-217	-1427	-1019	676	868	151	-44	180	-11	-120	293	1381	78	1974	50	30	-36	-8	25	-10	19	454	29	-12	-44	-65	-267	-101	26	-371	296	79	-112	-66	71	51	92	92	583	1180	299	9	16	21	14	28	-112	1
1564.6	364	-231	-1463	-1054	761	910	153	-47	179	-7	-122	311	1471	81	2093	57	31	-38	-8	27	-9	20	473	27	-12	-44	-67	-279	-105	28	-385	309	84	-117	-64	71	52	95	95	624	1241	317	11	1	24	10	29	-120	-7
1620.32	379	-240	-1489	-1076	813	937	154	-48	179	-5	-123	322	1526	83	2165	62	32	-39	-8	27	-9	20	485	27	-12	-44	-69	-287	-108	28	-394	316	86	-120	-62	70	52	96	97	648	1281	328	11	2	26	11	30	-122	-4
1653.7	390	-254	-1507	-1092	850	955	156	-49	179	-4	-125	331	1564	84	2217	65	33	-40	-8	28	-8	20	492	27	-12	-44	-70	-292	-109	29	-400	321	89	-122	-62	70	53	97	97	665	1309	334	11	10	23	11	27	-128	-5
1681.18	397	-261	-1522	-1105	875	967	156	-50	178	-3	-126	337	1593	84	2254	67	33	-40	-7	28	-8	20	498	25	-12	-44	-71	-295	-110	29	-404	324	90	-123	-62	70	53	98	97	678	1329	340	12	2	23	5	30	-132	-5
1701.49	404	-258	-1532	-1113	893	979	156	-50	178	-2	-127	342	1609	85	2274	69	33	-41	-8	29	-7	20	502	25	-12	-45	-71	-297	-111	30	-407	325	91	-124	-63	70	53	99	98	685	1334	342	11	9	26	-56	30	-127	-2
1701.49	406	-263	-1535	-1116	896	982	156	-52	178	-2	-127	344	1613	85	2280	69	33	-41	-7	28	-8	20	502	25	-12	-45	-72	-298	-111	29	-407	326	90	-124	-63	70	53	99	98	688	1331	342	9	0	25	10	2	-130	-5
1694.2	406	-260	-1535	-1117	893	983	157	-52	179	-2	-127	344	1612	85	2280	69	33	-40	-8	28	-8	20	503	25	-12	-45	-72	-298	-112	29	-407	325	91	-124	-63	70	53	99	97	689	1336	341	9	13	26	10	30	-132	-5
1687.61	405	-264	-1536	-1118	892	983	156	-52	180	-1	-127	344	1612	84	2279	69	32	-41	-7	28	-8	20	503	25	-12	-45	-72	-298	-112	29	-407	326	90	-124	-64	69	53	99	97	690	1339	340	10	1	25	10	30	-131	-2
1681.18	405	-263	-1536	-1118	889	984	156	-52	179	-2	-127	344	1612	84	2279	68	32	-41	-8	28	-8	20	503	25	-12	-46	-72	-299	-112	29	-408	328	90	-125	-64	69	53	99	97	693	1343	343	10	2	26	11	31	-132	-5
1721.79	411	-267	-1545	-1127	910	991	156	-53	178	0	-128	348	1633	85	2307	70	33	-41	-8	28	-8	21	507	25	-13	-45	-74	-302	-113	30	-412	326	91	-126	-63	70	53	100	98	701	1353	347	10	14	24	12	29	-133	-3
1734.64	413	-272	-1550	-1131	918	995	156	-53	177	-1	-128	350	1642	85	2320	70	32	-42	-7	28	-8	20	509	24	-13	-45	-74	-304	-114	29	-414	330	91	-126	-63	69	54	100	98	707	1371	351	12	0	25	10	30	-135	-2
1768.77	422	-275	-1565	-1148	957	1010	157	-54	176	1	-129	359	1684	86	2376	74	33	-42	-7	28	-7	20	517	24	-13	-45	-75	-311	-116	30	-422	336	93	-129	-63	69	54	102	100	728	1410	366	13	1	27	8	30	-137	-4
1802.68	432	-283	-1578	-1161	993	1025	158	-55	176	2	-131	369	1720	87	2424	77	33	-43	-7	28	-6	20	524	23	-13	-45	-77	-316	-118	31	-429	341	97	-131	-62	69	54	103	101	744	1440	376	15	6	27	10	33	-139	-2
1835.95	444	-293	-1593	-1175	1028	1040	159	-56	176	4	-132	382	1754	88	2469	80	34	-43	-7	29	-5	21	531	23	-13	-45	-78	-322	-119	31	-435	346	99	-133	-62	69	54	105	102	760	1467	386	16	3	26	9	35	-143	-3
1869.97	454	-297	-1606	-1189	1060	1055	160	-57	175	7	-133	398	1787	89	2514	83	34	-44	-7	29	-4	21	539	22	-14	-44	-79	-327	-121	32	-440	352	101	-134	-61	69	55	106	103	775	1503	396	17	2	27	10	33	-147	-2
1890.27	464	-299	-1616	-1199	1082	1066	161	-58	174	10	-135	415	1810	90	2540	86	34	-45	-6	28	-4	21	544	22	-14	-45	-80	-329	-121	33	-444	356	102	-135	-61	68	55	107	103	783	1520	399	19	0	28	8	35	-142	-4
1896.75	472	-309	-1620	-1204	1091	1073	160	-57	173	13	-136	432	1818	90	2548	87	34	-44	-6	28	-4	20	548	22	-14	-45	-80	-329	-122	33	-444	357	103	-135	-61	68	55	107	104	787	1512	400	18	5	24	9	34	-146	-1
1896.75	475	-305	-1623	-1206	1092	1076	160	-58	172	16	-136	443	1823	90	2552	87	34	-44	-6	28	-4	21	551	22	-14	-45	-80	-330	-122	34	-445	358	105	-136	-62	68	55	108	104	792	1524	402	18	1	27	7	33	-145	-2
1917	484	-311	-1634	-1217	1115	1086	161	-59	171	19	-137	459	1851	90	2586	89	34	-45	-6	28	-4	20	556	22	-15	-45	-80	-335	-124	34	-450	361	107	-137	-61	68	55	110	104	806	1549	412	20	4	27	10	35	-147	-1
1944.49	497	-316	-1643	-1227	1146	1099	162	-59	170	24	-139	480	1882	91	2622	92	36	-45	-6	29	-2	21	563	22	-14	-45	-81	-339	-125	35	-455	367	108	-139	-61	68	56	111	105	821	1578	424	19	2	28	8	38	-149	-3
1964.74	516	-324	-1649	-1237	1172	1114	162	-60	170	32	-140	509	1912	93	2658	94	37	-45	-6	30	-2	22	572	21	-13	-45	-81	-342	-126	38	-457	373	110	-140	-60	69	56	112	106	832	1604	432	21	8	26	10	35	-151	-2
1971.32	535	-322	-1654	-1244	1182	1124	163	-60	170	43	-142	543	1932	93	2676	93	37	-46	-6	30	-1	22	579	21	-13	-45	-82	-342	-126	39	-458	379	111	-140	-60	68	56	113	107	840	1625	438	21	0	28	9	36	-151	-3
1977.91	549	-328	-1659	-1251	1192	1133	163	-61	169	52	-143	573	1950	93	2694	91	37	-46	-6	31	-1	22	585	21	-13	-45	-82	-345	-126	40	-460	383	112	-141	-60	68	56	114	106	849	1643	444	23	2	26	10	36	-154	0
1977.86	583	-319	-1646	-1249	1198	1148	260	-61	169	61	-144	596	1959	92	2701	90	38	-46	-6	30	-1	22	590	21	-13	-45	-82	-345	-126	42	-460	386	114	-141	-60	68	56	115	106	853	1646	445	22	0	26	9	35	-151	-2
1937.3	638	-319	-1685	-1288	1166	1179	164	-60	153	130	-150	761	2020	90	2740	85	40	-46	-7	30	0	21	624	20	-15	-47	-80	-345	-125	55	-459	397	120	-143	-60	68	58	111	108	880	1684	439	5	-3	23	7	33	-149	1
1937.3	639	-325	-1686	-1288	1166	1179	164	-60	154	130	-150	762	2020	90	2741	85	40	-46	-6	30	0	21	624	21	-15	-47	-80	-345	-125	56	-460	400	121	-143	-61	68	58	111	108	880	1683	438	4	0	21	7	34	-148	1
1937.3	639	-328	-1686	-1288	1166	1179	163	-60	157	131	-150	762	2020	90	2741	85	40	-46	-7	30	0	21	624	21	-15	-47	-79	-345	-125	57	-460	402	120	-143	-61	68	58	111	108	879	1683	438	4	-2	21	6	34	-148	-2
1930.82	639	-327	-1686	-1288	1165	1179	163	-60	157	131	-150	763	2019	90	2740	85	40	-46	-7	30	0	21	624	21	-15	-47	-79	-345	-125	57	-460	401	121	-143	-61	69	58	111	108	879	1688	438	4	14	20	8	34	-150	2
1910.57	639	-326	-1686	-1288	1163	1179	162	-60	157	131	-149	763	2018	90	2738	85	39	-46	-7	30	0	21	624	21	-15	-47	-79	-344	-125	57	-459	401	120	-143	-61	68	58	111	108	878	1681	437	4	0	20	7	34	-150	2
1775.14	639	-319	-1682	-1282	1154	1176	162	-59	160	131	-149	761	2006	89	2722	85	40	-46	-7	30	-1	21	623	21	-14	-47	-78	-341	-123	58	-454	400	120	-141	-61	69	58	111	106	871	1662	431	2	13	22	4	34	-148	-2
1721.68	628	-314	-1668	-1267	1119	1164	160	-59	162	130	-149	752	1965	87	2671	83	40	-45	-7	30	-1	21	617	21	-14	-47	-77	-334	-121	57	-446	395	118	-138	-63	69	57	110	104	854	1633	419	1	0	20	5	35	-145	-1
1660.77	618	-298	-1648	-1246	1070	1150	159	-57	163	129	-147	741	1913	86	2602	81	39	-44	-8	30	-1	20	612	23	-13	-47	-74	-325	-117	56	-433	391	115	-134	-63	69	56	109	102	833	1586	401	1	12	19	8	29	-139	2
1539.22	588	-276	-1607	-1199	965	1115	155	-55	166	125	-145	713	1800	83	2453	74	39	-42	-9	31	-3	21	598	24	-11	-48	-69	-305	-111	54	-410	380	109	-128	-65	71	54	106	98	783	1494	360	-3	4	18	8	28	-134	-2
1431.32	561	-252	-1566	-1156	866	1079	153	-50	167	123	-142	685	1698	81	2320	68	39	-41	-9	32	-4	20	587	27	-9	-48	-65	-290	-106	53	-393	371	103	-121	-65	71	53	104	94	741	1418	327	-5	0	18	11	24	-121	-1
1336.5	530	-191	-1528	-1116	776	1043	150	-48	171	119	-139	658	1601	78	2192	61	38	-39	-11	32	-5	21	575	28	-8	-49	-62	-276	-100	51	-376	358	98	-117	-67	72	51	101	90	691	1336	292	-8	2	100	10	27	-115	-5
1208.52	497	-211	-1479	-1065	668	994	146	-45	173	115	-134	621	1476	75	2017	52	37	-36	-12	33	-7	20	556	30	-6	-49	-57	-256	-93	50	-351	342	89	-108	-68	73	50	97	86	623	1221	242	-14	9	15	12	24	-108	-3
1046.25	443	-172	-1405	-988	525	911	142	-40	176	107	-126	565	1293	72	1765	38	37	-33	-14	34	-10	21	522	33	-3	-50	-50	-227	-83	46	-318	319	77	-96	-68	75	48	93	81	525	1062	178	-22	2	18	11	19	-94	-5
863.89	385	-139	-1316	-901	385	803	138	-36	182	97	-114	500	1100	69	1494	23	34	-29	-15	35	-14	21	464	36	0	-51	-44	-198	-73	42	-280	281	64	-86	-69	77	46	88	75	417	888	109	-28	3	18	15	17	-81	-9
687.96	322	-108	-1209	-807	251	656	132	-31	186	82	-101	431	902	65	1220	9	30	-27	-16	32	-18	20	376	39	1	-51	-38	-167	-63	38	-246	241	52	-74	-72	78	45	84	69	316	731	60	-35	12	14	16	14	-72	-7
539.62	260	-75	-1093	-715	139	526	127	-26	190	64	-87	357	709	56	961	-3	22	-24	-15	25	-21	16	266	41	-2	-51	-33	-135	-53	30	-201	178	38	-61	-79	77	42	81	58	204	552	18	-41	9	11	19	9	-54	-7
336.85	183	-29	-892	-575	20	397	116	-21	195	35	-68	267	484	42	687	-11	13	-21	-13	16	-23	11	155	46	-5	-51	-24	-93	-39	23	-140	98	24	-42	-88	75	37	80	46	94	392	-14	-45	2	6	24	5	-33	-6
168.21	133	-1	-678	-444	-48	328	110	-19	199	16	-56	205	343	30	534	-10	9	-17	-11	7	-23	6	100	48	-7	-50	-16	-65	-29	20	-94	53	16	-29	-95	73	34	80	37	34	325	-39	-46	13	3	27	2	-18	-6
19.66	98	9	-447	-284	-85	287	102	-19	200	2	-47	162	256	21	443	-8	6	-16	-10	1	-23	2	75	51	-9	-50	-10	-48	-21	19	-65	33	14	-20	-100	73	32	81	30	0	283	-47	-48	12	-2	29	0	-9	-4
-0.49	86	12	-348	-207	-93	275	100	-19	200	-3	-44	148	231	19	416	-7	5	-17	-9	-1	-23	0	68	51	-10	-49	-9	-43	-19	19	-56	28	13	-18	-102	72	31	81	28	-13	268	-49	-49	5	-4	31	-2	-3	-5
12.64	68	19	-225	-137	-92	259	94	-19	195	-10	-42	129	197	14	383	-5	5	-16	-9	-4	-22	-2	60	52	-10	-47	-6	-35	-16	17	-43	28	11	-14	-104	71	30	81	25	-35	242	-52	-49	4	-6	32	-3	3	-3
32.99	68	17	-223	-137	-89	259	94	-19	196	-10	-42	128	197	15	383	-5	4	-16	-9	-4	-21	-2	60	52	-10	-47	-7	-35	-16	18	-43	25	12	-14	-104	71	30	81	25	-35	246	-52	-50	4	-6	32	-1	3	-2
46.71	69	9	-227	-138	-87	259	94	-19	198	-10	-42	129	199	15	384	-6	5	-16	-9	-4	-22	-2	60	52	-10	-47	-7	-35	-16	18	-44	26	11	-14	-104	71	30	81	25	-35	251	-52	-50	6	-9	34	-1	1	-3
53.3	70	11	-232	-139	-85	260	94	-19	198	-10	-42	129	200	15	386	-6	5	-16	-8	-3	-22	-2	61	52	-10	-47	-7	-36	-16	18	-45	26	11	-15	-104	71	30	80	26	-35	252	-52	-52	17	-7	32	-1	1	-2
60.53	69	9	-240	-145	-83	260	94	-20	199	-11	-42	130	202	16	388	-6	5	-16	-9	-3	-22	-2	61	51	-10	-47	-7	-37	-17	19	-47	28	12	-16	-104	71	30	80	26	-34	251	-52	-50	6	-7	34	-1	1	-3
66.96	70	9	-251	-151	-80	261	95	-20	200	-11	-42	131	205	16	390	-6	5	-15	-9	-3	-22	0	62	51	-10	-47	-8	-38	-18	18	-49	27	12	-16	-103	71	31	80	28	-33	257	-51	-50	11	-7	33	-1	2	-3
80.78	71	8	-268	-171	-78	262	95	-20	201	-11	-42	132	210	17	396	-7	5	-15	-9	-2	-22	0	63	51	-10	-46	-9	-41	-18	18	-53	30	12	-17	-102	71	31	79	29	-31	259	-51	-50	5	-5	32	0	0	-6
93.8	74	7	-287	-196	-74	264	95	-19	201	-10	-42	134	215	18	401	-8	5	-15	-9	-1	-22	0	64	50	-9	-47	-9	-43	-20	18	-56	32	12	-19	-102	72	31	79	29	-28	252	-50	-50	17	-6	32	-1	-4	-5
113.99	75	5	-315	-232	-71	266	95	-19	202	-10	-42	137	223	19	410	-8	6	-15	-10	0	-23	2	65	50	-9	-46	-11	-46	-21	18	-62	33	12	-21	-101	72	32	78	30	-24	257	-50	-48	11	-5	32	-1	-4	-3
134.35	79	8	-342	-268	-67	270	97	-19	203	-10	-42	140	230	20	417	-9	6	-15	-10	1	-23	3	67	50	-8	-46	-12	-49	-23	17	-66	34	13	-22	-99	72	32	78	31	-21	267	-48	-49	4	-5	34	0	-6	-4
168.43	81	9	-377	-308	-62	272	97	-19	204	-10	-43	142	241	22	427	-11	6	-15	-10	3	-23	3	69	49	-8	-46	-13	-53	-25	16	-73	36	13	-25	-97	73	33	77	33	-16	268	-47	-47	10	-3	31	3	-8	-3
195.26	86	5	-417	-344	-57	276	97	-19	204	-10	-43	146	251	23	438	-12	6	-15	-11	5	-23	4	71	49	-8	-46	-16	-57	-27	17	-80	37	13	-27	-97	72	33	77	34	-11	280	-45	-46	6	-3	31	1	-9	-3
229.18	89	4	-463	-382	-51	281	98	-19	205	-10	-44	149	266	25	454	-14	6	-15	-11	6	-24	5	73	48	-7	-46	-18	-62	-29	16	-89	43	14	-30	-96	73	34	75	36	-5	286	-42	-47	10	0	30	2	-10	-4
263.3	92	4	-507	-414	-45	286	99	-19	205	-9	-44	153	280	26	467	-15	6	-15	-12	7	-24	6	76	47	-7	-46	-19	-66	-31	16	-95	45	14	-32	-93	73	35	75	38	1	288	-39	-47	4	1	30	1	-15	-6
283.61	96	1	-538	-434	-40	290	99	-19	205	-9	-44	155	290	28	478	-16	6	-15	-12	8	-25	6	79	47	-7	-47	-20	-69	-32	16	-101	46	14	-33	-93	73	35	74	38	4	283	-38	-48	3	1	28	2	-19	-5
303.8	98	-3	-563	-450	-35	293	99	-19	207	-9	-45	158	299	29	487	-17	6	-14	-12	9	-25	6	81	46	-7	-46	-21	-72	-34	15	-106	49	14	-35	-93	74	35	73	39	8	299	-36	-46	6	2	29	4	-19	-4
330.64	102	-7	-591	-469	-28	298	100	-18	206	-8	-45	162	313	30	501	-19	5	-14	-12	10	-26	7	84	46	-7	-46	-23	-77	-36	15	-115	50	15	-37	-91	73	35	72	42	16	300	-32	-46	16	1	30	6	-20	-2
371.14	106	-9	-639	-499	-19	306	101	-20	208	-8	-46	166	334	32	526	-20	6	-14	-13	12	-26	8	89	45	-7	-47	-26	-83	-39	15	-126	54	15	-41	-89	74	37	71	44	26	324	-27	-47	4	5	27	7	-24	-4
431.95	113	-20	-703	-538	-5	320	104	-20	207	-6	-48	174	370	35	563	-24	6	-14	-13	13	-27	9	97	44	-7	-47	-29	-92	-43	16	-141	59	17	-45	-86	74	37	68	47	41	352	-19	-48	11	4	27	7	-28	-4
499.28	122	-26	-774	-579	14	339	106	-21	206	-4	-52	183	409	37	609	-26	7	-15	-13	16	-27	10	107	43	-8	-47	-31	-102	-46	16	-155	69	19	-50	-85	74	39	67	50	57	372	-9	-49	3	10	26	6	-32	-3
538.87	129	-35	-813	-601	25	349	107	-22	206	-3	-54	188	431	39	635	-27	7	-15	-13	17	-28	11	114	42	-8	-46	-32	-107	-48	17	-163	69	20	-53	-84	74	39	66	51	70	385	-1	-49	3	8	24	8	-38	-4
594.11	136	-42	-861	-631	43	367	109	-23	206	-1	-57	197	472	41	687	-28	8	-16	-13	17	-28	12	131	42	-9	-47	-34	-119	-51	17	-179	85	24	-57	-83	74	40	65	55	97	424	16	-49	3	10	24	9	-40	-6
675.16	152	-59	-938	-676	72	396	111	-25	204	2	-64	213	536	44	776	-28	9	-18	-13	18	-27	13	161	40	-10	-46	-37	-132	-57	19	-198	104	29	-62	-82	73	41	64	58	133	458	39	-48	10	10	23	9	-48	-5
796.82	178	-80	-1035	-734	123	454	115	-29	201	8	-76	244	647	47	938	-25	11	-22	-12	18	-24	13	224	38	-13	-46	-42	-155	-64	22	-233	149	38	-70	-80	72	43	67	66	204	590	87	-43	3	13	21	13	-57	-4
954.23	225	-107	-1156	-812	218	555	121	-34	195	21	-91	309	820	52	1179	-14	17	-27	-11	18	-19	14	306	36	-16	-45	-48	-184	-74	26	-270	203	51	-81	-78	71	46	73	72	297	755	138	-34	12	12	21	16	-69	-3
1107.27	283	-139	-1257	-888	325	659	128	-38	192	37	-106	380	1001	56	1420	0	21	-30	-10	19	-15	15	375	32	-15	-45	-52	-208	-82	30	-298	244	62	-89	-76	70	47	77	76	379	892	179	-29	3	12	18	17	-80	-2
1221.59	331	-159	-1320	-940	412	733	133	-42	191	50	-114	431	1132	60	1593	12	24	-33	-10	21	-12	15	418	31	-15	-45	-56	-225	-87	33	-319	273	68	-96	-75	69	48	80	80	441	996	210	-23	2	12	17	19	-89	-4
1309.93	369	-172	-1366	-982	487	791	135	-44	187	60	-121	472	1236	62	1729	21	26	-34	-9	21	-12	16	449	30	-15	-45	-59	-239	-92	36	-335	291	73	-101	-74	69	49	83	83	491	1071	234	-21	11	15	14	22	-94	-3
1377.32	395	-188	-1400	-1010	546	831	138	-46	188	67	-124	502	1312	65	1829	27	27	-35	-9	23	-11	17	469	29	-14	-45	-61	-250	-95	37	-346	304	78	-106	-72	69	49	85	86	526	1130	252	-18	4	17	14	25	-100	-1
1424.36	418	-203	-1425	-1034	595	865	140	-48	185	72	-127	526	1375	66	1909	32	29	-36	-9	23	-10	17	486	28	-14	-45	-63	-258	-98	39	-355	313	81	-109	-71	68	50	87	87	557	1203	267	-15	15	15	15	24	-106	-3
1471.82	435	-205	-1444	-1053	633	888	141	-48	184	76	-129	544	1421	67	1967	35	29	-38	-9	24	-9	17	497	28	-14	-46	-64	-264	-100	40	-363	320	83	-111	-71	68	51	88	88	579	1217	277	-17	1	18	14	26	-105	-3
1498.77	448	-215	-1460	-1068	664	907	142	-49	185	80	-131	560	1463	69	2023	39	30	-39	-9	24	-9	17	507	27	-14	-45	-65	-270	-102	40	-370	330	87	-114	-70	68	51	90	90	605	1248	290	-15	9	18	13	26	-109	-2
1552.99	469	-228	-1485	-1092	723	940	143	-52	185	85	-133	586	1531	71	2112	44	31	-40	-9	25	-8	18	524	25	-14	-45	-67	-280	-105	43	-382	339	90	-118	-69	67	51	92	91	637	1300	310	-14	2	17	13	25	-114	0
1620.27	495	-238	-1514	-1121	794	977	145	-54	183	92	-136	615	1607	73	2213	50	32	-41	-9	25	-7	18	541	24	-14	-45	-69	-289	-109	44	-393	350	93	-121	-68	67	52	94	94	671	1354	325	-14	2	19	9	27	-117	-2
1653.7	508	-248	-1530	-1134	824	993	146	-55	184	96	-138	631	1639	74	2254	52	33	-41	-8	26	-6	18	549	24	-14	-45	-70	-293	-109	45	-398	356	95	-123	-68	67	53	95	94	687	1377	332	-13	1	17	10	25	-123	-2
1673.95	519	-256	-1542	-1148	852	1009	146	-55	182	99	-139	645	1674	75	2299	55	34	-42	-8	26	-6	18	555	24	-14	-45	-71	-298	-112	46	-403	361	98	-125	-67	68	53	95	95	703	1401	339	-12	14	17	10	28	-126	-2
1694.14	527	-262	-1551	-1156	869	1018	146	-56	184	101	-139	654	1693	75	2323	56	34	-43	-9	27	-6	18	560	23	-14	-46	-71	-301	-112	46	-406	362	99	-126	-67	68	53	96	96	715	1414	343	-13	2	16	9	27	-125	-2
1701.43	531	-259	-1556	-1161	878	1025	146	-56	185	103	-140	659	1701	77	2332	57	34	-43	-9	27	-6	19	562	23	-14	-46	-71	-302	-112	46	-406	365	99	-126	-68	67	53	96	96	717	1420	342	-11	1	19	9	29	-125	-1
1694.14	533	-262	-1557	-1161	876	1026	146	-56	184	103	-140	660	1701	77	2333	57	34	-42	-8	27	-6	19	562	23	-14	-46	-71	-301	-112	47	-406	364	99	-126	-67	67	53	96	96	718	1417	341	-13	9	18	10	27	-125	-1
1681.18	532	-261	-1558	-1163	873	1027	145	-56	184	104	-140	661	1701	77	2332	57	34	-42	-9	27	-5	19	563	23	-14	-46	-71	-301	-112	46	-407	364	99	-126	-68	68	53	96	96	719	1422	341	-13	4	18	10	29	-125	-1
1673.95	533	-260	-1559	-1163	872	1027	145	-56	185	105	-140	662	1701	75	2332	57	34	-42	-8	27	-6	19	564	24	-14	-46	-71	-301	-112	46	-407	364	99	-126	-67	67	53	96	96	719	1417	340	-13	3	19	11	28	-124	-1
1667.36	532	-260	-1560	-1164	870	1027	145	-56	187	104	-140	662	1700	75	2331	57	34	-42	-8	27	-6	19	564	24	-14	-46	-71	-301	-112	46	-406	363	99	-126	-68	68	53	96	96	720	1424	339	-14	1	19	9	28	-127	-1
1701.49	533	-264	-1562	-1166	872	1029	145	-56	187	105	-140	664	1706	77	2339	57	34	-42	-8	27	-6	19	565	23	-15	-46	-72	-303	-112	46	-408	363	100	-126	-67	67	53	96	96	724	1431	342	-13	3	17	11	28	-126	0
1714.39	538	-262	-1567	-1171	883	1033	145	-56	186	106	-140	668	1719	77	2354	58	34	-43	-8	27	-6	19	567	23	-15	-46	-72	-305	-113	47	-411	366	101	-128	-68	67	53	96	97	734	1448	351	-13	13	19	8	32	-127	-2
1762.13	556	-271	-1582	-1189	939	1056	146	-58	187	110	-141	690	1781	79	2438	62	36	-44	-8	28	-5	19	577	22	-13	-46	-75	-314	-117	49	-421	375	104	-132	-66	67	54	99	98	763	1505	374	-11	-2	19	9	30	-131	-1
1809.22	576	-284	-1601	-1209	992	1081	148	-59	185	116	-143	718	1837	81	2512	67	36	-45	-8	29	-4	20	588	21	-13	-46	-77	-323	-119	51	-431	384	107	-134	-64	67	55	102	100	788	1542	396	-10	1	19	9	30	-133	-1
1856.25	596	-293	-1618	-1228	1040	1104	149	-60	185	122	-145	743	1888	83	2579	70	38	-46	-8	29	-3	20	599	21	-13	-46	-78	-330	-121	53	-439	389	110	-138	-64	67	55	104	101	812	1589	410	-9	14	19	8	31	-139	0
1896.8	616	-304	-1637	-1249	1083	1126	150	-61	183	130	-147	772	1938	83	2641	74	39	-47	-8	29	-2	20	611	21	-14	-46	-79	-336	-123	54	-448	400	114	-140	-64	67	56	106	103	836	1632	425	-7	0	19	8	34	-141	0
1937.3	635	-315	-1654	-1267	1123	1146	151	-62	182	138	-150	802	1986	84	2702	77	39	-47	-8	29	-1	19	622	20	-15	-46	-81	-342	-126	57	-455	406	116	-142	-64	67	56	107	104	858	1670	438	-6	9	19	8	33	-144	-1
1977.91	657	-321	-1670	-1284	1156	1165	152	-62	182	149	-151	831	2030	85	2756	81	40	-48	-7	30	0	20	632	19	-15	-46	-82	-348	-127	59	-461	415	120	-145	-63	67	56	109	105	879	1711	450	-3	1	19	7	34	-147	1
2011.82	681	-333	-1684	-1302	1191	1188	153	-63	183	162	-154	868	2080	86	2817	84	41	-48	-8	30	1	20	646	19	-15	-46	-82	-354	-130	64	-467	424	121	-147	-63	67	57	111	106	900	1747	461	-3	1	18	9	34	-150	2
2032.13	702	-337	-1694	-1313	1210	1204	153	-63	182	177	-155	895	2107	86	2846	86	42	-49	-8	30	2	20	654	19	-14	-46	-82	-355	-129	70	-468	430	123	-147	-63	67	57	111	106	908	1756	464	-4	7	18	7	34	-149	2
2072.74	810	-351	-1758	-1384	1242	1271	183	5	185	283	-162	1025	2226	88	2985	88	46	-47	-7	31	4	21	700	18	-15	-47	-78	-365	-131	100	-479	457	132	-151	-62	67	59	121	102	968	1842	509	10	-5	13	3	33	-155	1
2066.15	812	-356	-1758	-1384	1241	1272	185	5	186	287	-162	1028	2227	89	2987	88	46	-47	-7	31	4	21	700	18	-15	-47	-78	-365	-131	101	-477	459	133	-151	-62	67	59	121	102	968	1840	508	8	-1	11	6	32	-154	4
1951.07	812	-352	-1757	-1383	1236	1272	185	5	189	288	-161	1028	2222	88	2981	88	46	-46	-7	31	4	21	700	19	-15	-47	-77	-364	-130	102	-476	462	133	-150	-62	67	60	120	102	966	1836	506	7	1	13	6	28	-152	-1
1775.14	794	-344	-1731	-1353	1172	1251	186	7	192	286	-159	1007	2142	86	2877	84	45	-45	-8	32	3	20	691	20	-14	-47	-72	-347	-124	99	-456	452	127	-143	-64	68	58	120	98	926	1749	471	4	2	9	7	33	-142	-1
1653.59	758	-307	-1687	-1303	1066	1213	181	10	193	280	-156	972	2027	83	2730	77	45	-43	-9	33	2	21	680	22	-12	-48	-68	-329	-118	96	-434	442	123	-137	-65	69	56	118	94	877	1657	425	2	1	11	5	30	-133	-2
1545.8	725	-281	-1650	-1261	970	1178	177	13	196	276	-152	937	1921	81	2594	71	44	-41	-9	34	1	21	668	23	-10	-48	-64	-313	-112	94	-415	428	116	-131	-65	70	54	115	90	826	1570	383	-1	13	12	6	28	-128	-2
1346.38	666	-250	-1586	-1184	795	1104	172	17	199	266	-146	861	1706	77	2299	54	42	-36	-12	36	-3	21	635	28	-6	-49	-55	-276	-99	87	-371	400	100	-116	-66	73	52	109	83	694	1338	281	-10	1	9	8	26	-115	-1
999.22	538	-182	-1445	-1028	505	932	161	26	204	240	-128	711	1331	71	1780	25	39	-30	-15	38	-11	22	551	33	1	-51	-43	-219	-79	74	-304	336	73	-93	-67	78	48	99	72	481	984	141	-24	9	10	11	17	-90	-6
580.07	348	-95	-1205	-797	152	581	145	35	212	175	-94	474	817	55	1079	-13	22	-21	-15	26	-21	17	302	40	-3	-52	-31	-143	-55	48	-211	193	40	-63	-80	77	44	91	52	226	601	33	-38	6	7	16	11	-61	-6
316.55	220	-24	-928	-594	-22	397	130	41	219	113	-68	320	503	37	698	-22	10	-13	-13	13	-25	10	152	46	-7	-52	-20	-90	-38	35	-133	83	20	-39	-90	75	37	91	36	85	403	5	-44	2	2	23	5	-32	-6
93.53	145	7	-594	-388	-107	308	119	43	221	74	-51	226	324	21	512	-18	5	-12	-10	4	-24	4	92	49	-9	-50	-11	-58	-25	30	-79	35	14	-24	-99	74	34	92	26	13	325	-10	-46	8	-6	29	1	-15	-3
5.99	115	7	-401	-243	-126	281	115	43	221	60	-45	195	269	16	456	-15	3	-12	-9	-1	-24	1	78	51	-10	-49	-8	-46	-20	29	-60	28	12	-18	-102	73	32	92	23	-12	296	-19	-46	6	-10	30	1	-4	-4
-0.54	108	12	-337	-197	-128	275	114	42	221	56	-44	185	253	15	440	-15	3	-12	-8	-2	-24	0	73	51	-10	-49	-6	-43	-18	29	-54	23	12	-17	-103	73	32	92	21	-21	282	-21	-44	16	-9	32	0	2	-5
-0.54	101	8	-288	-167	-129	270	113	41	222	52	-43	177	240	13	428	-14	3	-12	-8	-3	-23	0	71	52	-11	-49	-5	-40	-17	29	-49	21	10	-15	-104	73	31	92	20	-29	258	-23	-41	8	-11	32	-1	2	-5
19.76	93	12	-237	-144	-125	263	110	40	219	47	-42	168	226	11	415	-14	3	-13	-8	-4	-23	-2	67	52	-11	-47	-5	-37	-16	28	-45	26	9	-14	-105	72	30	92	18	-40	265	-26	-43	2	-11	33	-1	6	-5
26.35	94	12	-234	-143	-122	263	111	41	220	46	-40	168	225	11	414	-13	2	-12	-8	-4	-24	-2	68	52	-11	-47	-4	-36	-16	29	-44	25	10	-14	-105	72	31	92	18	-41	265	1	-45	17	-12	32	-3	4	-2
26.35	92	9	-233	-143	-120	262	109	40	220	46	-42	167	224	11	414	-14	2	-12	-8	-4	-24	-2	68	51	-11	-47	-4	-37	-16	28	-44	24	9	-14	-105	72	30	92	18	-42	264	-4	-45	6	-11	33	0	4	-2
40.12	94	10	-233	-143	-119	262	110	40	221	46	-42	167	226	11	415	-14	2	-12	-8	-4	-23	-3	68	51	-11	-47	-5	-37	-16	29	-45	25	9	-14	-106	72	30	91	18	-42	269	-6	-46	16	-11	35	-1	4	-2
66.91	93	8	-241	-147	-116	262	110	40	220	45	-42	168	228	12	416	-14	2	-12	-9	-4	-24	-2	68	51	-11	-47	-5	-38	-17	28	-47	27	10	-15	-104	72	31	91	19	-41	263	-6	-46	5	-12	33	0	2	-2
80.78	94	6	-258	-158	-112	263	110	40	221	45	-42	170	233	13	422	-15	2	-12	-9	-3	-24	-2	70	51	-10	-47	-6	-42	-19	28	-52	27	9	-17	-104	72	31	90	21	-37	274	-5	-46	5	-10	35	-1	2	-2
134.3	100	8	-327	-249	-103	270	112	40	224	45	-43	178	254	17	443	-18	3	-12	-9	1	-25	2	74	49	-9	-47	-10	-51	-24	27	-69	36	11	-23	-100	73	33	88	25	-25	295	0	-46	5	-6	31	-2	0	-5
208.87	110	8	-445	-374	-88	282	115	40	225	46	-44	189	289	21	479	-22	3	-12	-11	5	-26	5	81	47	-9	-46	-16	-64	-30	26	-92	39	12	-31	-94	74	34	85	30	-7	308	7	-42	9	-5	31	0	-8	-4
316.82	124	-3	-596	-482	-66	299	119	40	225	48	-45	204	340	26	531	-28	4	-12	-12	10	-27	7	92	45	-8	-47	-21	-79	-36	26	-119	49	14	-38	-90	75	37	82	36	13	339	17	-42	3	-2	31	4	-14	-2
391.28	135	-9	-687	-539	-49	315	121	39	225	49	-47	214	378	30	571	-31	4	-12	-12	12	-28	9	99	44	-8	-47	-25	-88	-40	26	-133	54	17	-42	-88	75	37	80	38	26	359	23	-42	13	2	27	6	-24	-6
444.96	142	-18	-746	-573	-37	327	123	39	226	51	-49	221	403	32	602	-33	5	-13	-13	13	-28	9	106	43	-8	-47	-26	-94	-43	26	-143	57	16	-45	-87	75	38	78	41	36	370	28	-43	4	3	26	7	-27	-5
485.41	150	-21	-791	-599	-24	339	124	38	226	53	-52	228	431	34	633	-34	5	-13	-13	16	-29	10	114	43	-8	-47	-28	-100	-45	26	-154	64	18	-50	-85	75	39	77	43	49	390	36	-43	14	5	28	5	-30	-3
533.2	156	-18	-840	-629	-10	353	126	36	226	53	-53	235	461	36	669	-35	6	-14	-13	16	-29	10	124	42	-9	-47	-30	-108	-48	26	-164	71	22	-52	-83	76	40	76	45	63	413	44	-42	1	10	25	15	-37	-8
573.8	164	-35	-883	-656	4	369	128	36	225	56	-57	244	494	38	712	-36	7	-15	-13	17	-29	11	137	41	-9	-47	-32	-118	-51	28	-178	83	23	-56	-82	75	40	75	48	85	435	58	-42	15	8	27	11	-33	-3
647.68	179	-45	-955	-699	30	396	130	34	223	61	-62	263	555	41	796	-36	8	-17	-13	18	-29	12	165	40	-11	-46	-34	-131	-56	29	-197	105	28	-61	-81	75	42	75	52	121	488	82	-40	1	11	24	9	-44	-6
749.03	201	-62	-1037	-747	66	437	133	31	221	68	-72	293	639	44	923	-33	10	-19	-12	18	-27	13	216	38	-13	-46	-38	-149	-62	32	-223	141	35	-68	-78	74	44	77	58	174	577	115	-37	11	12	23	13	-50	-2
884.41	246	-96	-1151	-819	139	521	138	27	215	86	-87	356	783	48	1125	-24	14	-24	-11	17	-22	13	291	36	-16	-46	-43	-172	-70	36	-254	187	46	-76	-77	72	45	81	65	246	704	152	-31	3	8	21	13	-60	-5
1012.39	294	-118	-1236	-882	210	598	143	24	213	107	-99	420	916	50	1307	-14	18	-27	-10	17	-18	13	351	35	-17	-45	-47	-192	-76	40	-277	225	58	-83	-77	71	46	84	69	309	818	185	-26	-1	9	17	14	-67	-4
1140.53	353	-140	-1312	-945	297	688	147	19	211	131	-111	500	1078	54	1529	-1	22	-30	-10	19	-14	14	418	32	-16	-45	-50	-216	-84	48	-306	275	66	-92	-74	71	48	90	74	400	974	227	-19	2	9	16	13	-81	-5
1282.45	425	-174	-1386	-1011	414	789	152	15	208	157	-123	589	1259	60	1769	15	27	-32	-9	22	-11	16	479	30	-15	-45	-55	-240	-91	56	-333	316	78	-101	-70	70	49	94	79	489	1113	270	-15	6	8	13	19	-89	-3
1431.49	500	-204	-1459	-1081	555	890	158	10	206	184	-133	681	1457	65	2031	30	32	-35	-9	25	-8	17	538	28	-14	-45	-60	-267	-100	67	-364	360	89	-114	-68	69	51	99	85	593	1273	324	-7	3	9	13	22	-97	-2
1545.8	563	-226	-1512	-1135	685	969	162	8	205	206	-139	755	1613	69	2234	42	35	-38	-9	27	-6	18	577	25	-14	-45	-63	-286	-106	74	-387	385	98	-121	-66	69	53	103	89	670	1390	367	-3	13	12	10	29	-108	-1
1633.45	605	-250	-1554	-1177	777	1021	165	5	204	220	-143	800	1705	71	2350	49	37	-39	-9	28	-5	18	596	24	-14	-45	-65	-295	-109	77	-397	397	102	-124	-66	69	53	104	90	704	1440	382	-2	1	9	9	27	-116	2
1674	626	-261	-1574	-1197	817	1046	166	5	202	227	-145	822	1750	72	2406	52	38	-40	-9	28	-4	18	608	23	-14	-45	-65	-299	-111	79	-402	401	104	-126	-67	69	53	105	91	720	1459	384	-3	12	11	9	27	-117	2
1681.18	630	-262	-1580	-1202	821	1051	166	4	202	229	-145	826	1759	72	2417	52	38	-40	-8	28	-4	18	610	24	-20	-45	-65	-301	-111	79	-403	403	103	-126	-66	68	54	105	91	725	1464	384	-3	2	9	8	24	-119	1
1667.36	630	-258	-1582	-1204	818	1052	166	4	202	230	-145	828	1759	72	2417	53	37	-40	-8	28	-4	19	610	23	-15	-46	-65	-301	-111	78	-403	403	105	-126	-66	68	54	105	91	727	1465	383	-3	1	12	10	26	-116	-1
1653.7	631	-262	-1584	-1205	813	1054	165	4	201	231	-145	828	1758	72	2416	52	37	-40	-9	28	-4	19	611	24	-15	-46	-65	-301	-111	79	-403	404	104	-126	-66	69	53	105	92	728	1463	381	-5	1	11	11	28	-118	2
1687.61	634	-264	-1589	-1211	822	1058	166	4	200	233	-146	835	1775	73	2441	53	37	-41	-8	27	-4	19	613	24	-16	-46	-66	-305	-112	80	-408	405	105	-128	-65	68	54	105	92	742	1490	391	-4	2	11	10	27	-117	-2
1721.74	648	-270	-1602	-1224	856	1075	167	3	201	236	-147	850	1811	73	2490	56	38	-41	-9	28	-4	19	620	23	-14	-46	-67	-310	-114	81	-413	410	108	-129	-65	68	54	106	93	761	1521	403	-5	1	10	8	28	-122	-2
1754.89	663	-277	-1615	-1240	896	1093	167	2	202	241	-148	869	1854	75	2544	59	39	-42	-9	29	-3	19	628	22	-14	-46	-68	-315	-115	83	-419	417	110	-132	-65	68	55	108	94	780	1552	414	-5	2	11	8	29	-124	0
1782.38	679	-285	-1625	-1253	932	1110	169	1	202	246	-150	887	1891	77	2593	61	40	-42	-8	29	-2	19	636	22	-12	-46	-69	-321	-117	85	-424	422	112	-134	-64	67	55	109	95	799	1575	424	-4	8	11	9	28	-126	0
1809.22	691	-289	-1637	-1265	963	1125	170	0	202	251	-151	904	1924	78	2638	64	41	-43	-8	29	-2	20	644	22	-14	-46	-70	-326	-119	87	-431	428	115	-136	-64	67	55	110	96	818	1607	436	-4	0	13	8	29	-125	-2
1843.24	708	-295	-1649	-1279	999	1143	171	0	202	256	-152	923	1965	79	2693	67	41	-43	-8	30	-1	20	652	21	-13	-46	-71	-331	-120	89	-436	433	117	-138	-64	67	56	111	97	837	1643	444	-3	11	12	6	31	-129	1
1876.5	722	-312	-1663	-1293	1035	1159	172	-1	202	262	-154	942	2003	80	2742	69	42	-44	-8	31	0	20	660	20	-17	-46	-72	-336	-122	92	-443	439	118	-139	-63	68	56	112	98	856	1671	453	-3	1	8	7	29	-135	2
1910.57	741	-313	-1677	-1309	1073	1180	173	-2	202	269	-156	965	2049	81	2803	72	43	-44	-7	31	0	20	670	20	-12	-46	-74	-342	-124	94	-450	449	122	-143	-63	67	57	113	100	880	1706	463	-3	5	12	5	31	-133	3
1951.07	763	-322	-1696	-1329	1118	1203	175	-3	201	279	-157	994	2101	83	2874	75	44	-45	-8	31	1	20	682	19	-12	-46	-75	-349	-126	98	-458	456	123	-145	-61	67	57	115	101	905	1749	473	-1	2	13	7	30	-139	-1
1991.57	784	-329	-1713	-1347	1159	1225	176	-4	200	290	-159	1022	2151	83	2938	78	45	-45	-7	32	2	20	693	19	-12	-46	-76	-355	-128	101	-464	464	129	-147	-61	67	57	116	102	930	1795	487	-2	-1	15	5	34	-140	0
2025.76	806	-341	-1728	-1363	1193	1246	177	-5	205	301	-160	1050	2192	84	2995	80	46	-46	-7	32	3	20	702	19	-15	-46	-76	-361	-130	104	-470	473	133	-149	-61	67	58	117	104	951	1825	498	-2	12	12	6	34	-145	-1
2066.26	831	-350	-1747	-1381	1235	1270	179	-5	200	318	-163	1086	2245	86	3060	83	47	-47	-7	32	4	21	717	18	-15	-46	-77	-367	-133	109	-477	486	134	-152	-60	67	58	117	105	977	1875	515	-2	1	11	6	35	-147	0
2093.04	860	-358	-1762	-1394	1270	1292	180	-6	202	336	-164	1131	2290	87	3112	85	48	-47	-7	33	5	21	729	18	-12	-46	-77	-371	-134	115	-481	494	138	-153	-61	67	59	117	105	995	1900	522	-3	1	11	6	34	-147	2
2119.82	973	-351	-1820	-1440	1142	1349	236	-6	189	413	-167	1268	2381	89	3237	102	50	-45	-7	32	5	21	769	17	-15	-47	-75	-377	-134	129	-488	559	154	-156	-62	66	60	120	107	1037	1967	527	14	-2	7	5	31	-147	4
2113.29	978	-355	-1820	-1440	1141	1351	236	-6	191	416	-167	1272	2382	89	3240	102	50	-45	-6	33	5	21	769	17	-15	-47	-74	-377	-134	131	-488	561	154	-156	-61	66	60	120	107	1037	1972	528	13	0	6	5	30	-146	4
2058.86	987	-351	-1827	-1444	1124	1356	238	-5	187	435	-169	1291	2385	89	3254	100	50	-45	-7	32	5	21	776	18	-16	-47	-72	-377	-134	132	-487	573	158	-155	-62	66	60	118	106	1036	1964	524	11	1	5	4	29	-147	6
2058.91	988	-353	-1827	-1444	1123	1356	238	-6	190	436	-168	1293	2384	89	3254	99	50	-44	-7	32	6	21	776	17	-15	-47	-72	-376	-134	134	-487	574	158	-156	-63	66	60	118	106	1036	1967	523	8	9	6	3	30	-144	4
2058.86	987	-354	-1828	-1444	1123	1356	237	-5	191	437	-169	1291	2384	89	3254	99	50	-44	-7	32	6	21	776	18	-16	-47	-72	-377	-134	134	-487	574	159	-155	-62	66	60	118	106	1035	1964	523	8	8	6	4	30	-147	6
1971.27	987	-350	-1827	-1443	1119	1355	237	-5	192	436	-169	1291	2380	89	3249	99	50	-44	-6	32	5	21	776	18	-15	-47	-72	-376	-133	134	-485	574	158	-154	-62	66	60	118	105	1031	1965	519	8	2	7	1	29	-144	3
1835.95	974	-337	-1809	-1420	1070	1338	235	-4	194	434	-166	1267	2305	86	3152	96	49	-42	-7	32	5	21	766	19	-14	-48	-67	-356	-126	130	-462	561	151	-147	-64	68	57	115	100	973	1832	463	7	15	6	5	29	-141	4
1498.61	869	-276	-1710	-1299	816	1231	227	3	199	416	-158	1148	1991	80	2751	75	47	-36	-11	36	0	22	729	23	-8	-49	-57	-309	-109	118	-407	519	131	-129	-66	71	53	108	91	820	1617	340	-1	2	2	6	23	-122	2
1255.45	759	-223	-1612	-1183	586	1111	218	9	202	395	-147	1027	1724	75	2398	55	43	-32	-13	38	-4	22	697	28	-4	-50	-49	-275	-98	107	-368	480	114	-117	-67	73	51	104	85	696	1385	271	-5	2	2	10	19	-104	0
1079.62	662	-172	-1525	-1083	417	993	213	14	203	372	-136	922	1505	72	2094	38	41	-29	-15	40	-9	23	649	30	0	-51	-44	-245	-87	97	-335	436	98	-105	-66	76	49	99	80	575	1177	190	-9	5	7	10	19	-92	-3
850.01	555	-130	-1419	-966	242	812	202	19	205	331	-118	773	1211	67	1679	16	34	-24	-17	36	-16	22	524	35	-1	-52	-36	-198	-72	78	-280	340	73	-85	-72	77	47	94	69	391	861	85	-17	4	6	9	14	-78	-4
458.41	350	-43	-1171	-737	-36	506	184	31	212	223	-82	495	714	44	1029	-12	16	-15	-14	19	-24	13	245	42	-6	-52	-24	-122	-48	47	-178	139	35	-53	-86	74	40	90	47	152	509	28	-33	11	3	20	7	-43	-3
215.19	223	9	-850	-519	-163	359	168	36	217	148	-57	340	448	26	724	-13	7	-11	-12	8	-26	6	135	46	-9	-52	-14	-77	-33	37	-111	56	20	-32	-95	73	34	90	32	42	368	-1	-38	7	-4	25	3	-21	-3
39.91	160	27	-536	-322	-213	300	159	38	217	112	-45	264	324	16	586	-8	3	-10	-10	1	-26	2	97	49	-11	-51	-7	-53	-23	35	-71	26	17	-21	-102	72	32	92	26	-9	315	-13	-40	18	-8	30	-2	-6	-2
-0.59	138	25	-394	-215	-225	283	156	38	218	99	-42	240	289	12	546	-6	2	-10	-9	-2	-25	-2	89	50	-11	-50	-5	-46	-20	34	-59	23	13	-18	-105	72	31	92	23	-26	309	-16	-40	7	-11	30	-2	0	-2
-0.59	129	26	-331	-175	-227	277	154	38	219	94	-40	230	272	11	529	-5	1	-11	-9	-4	-26	-2	86	51	-12	-49	-4	-43	-18	33	-53	24	12	-16	-107	71	30	92	21	-36	289	-19	-41	7	-10	30	-1	4	-1
-0.54	125	25	-300	-160	-226	274	152	38	219	90	-39	225	265	10	521	-5	2	-11	-8	-4	-25	-3	84	51	-12	-49	-3	-41	-17	33	-49	22	13	-15	-108	71	30	92	20	-42	288	-17	-40	18	-13	29	0	3	1
-0.54	122	24	-275	-149	-224	271	152	38	219	88	-39	222	259	9	515	-4	1	-10	-8	-4	-25	-3	83	51	-12	-48	-3	-40	-17	34	-47	24	12	-15	-108	71	30	92	20	-46	283	-17	-40	5	-13	33	-5	6	-2
-0.54	119	25	-263	-145	-223	270	152	38	219	85	-39	219	254	9	510	-4	1	-11	-8	-4	-25	-3	82	51	-11	-48	-3	-39	-16	33	-46	25	11	-14	-108	71	30	92	19	-49	276	-19	-40	6	-14	32	-1	7	-4
19.71	119	28	-257	-143	-221	270	152	38	220	85	-38	218	253	9	509	-4	2	-11	-8	-4	-25	-3	82	51	-11	-48	-2	-39	-16	33	-46	24	12	-14	-108	71	30	92	20	-50	272	-17	-40	16	-11	32	-1	6	-1
19.76	118	27	-256	-143	-219	270	152	38	220	84	-38	218	252	9	508	-4	1	-11	-8	-4	-25	-3	83	51	-11	-47	-2	-39	-16	33	-46	26	12	-14	-108	71	30	92	19	-51	239	-17	-41	17	-12	31	-3	8	-4
32.94	118	27	-253	-143	-217	269	151	38	220	83	-39	217	252	9	508	-4	2	-11	-9	-5	-25	-3	82	51	-11	-48	-2	-39	-16	33	-46	26	11	-14	-108	71	30	92	20	-52	266	-19	-38	5	-13	34	-5	4	0
40.12	117	29	-254	-143	-215	269	151	38	221	82	-39	217	252	9	508	-4	2	-11	-8	-4	-25	-3	83	51	-11	-48	-2	-39	-17	33	-47	28	12	-14	-109	71	30	91	19	-54	220	-19	-39	9	-11	31	-2	8	-2
53.3	116	23	-257	-145	-213	269	151	38	222	81	-39	217	254	9	509	-5	1	-11	-9	-5	-25	-3	83	51	-11	-47	-3	-40	-17	33	-48	28	12	-15	-108	71	30	91	20	-54	258	-19	-39	5	-13	32	-2	5	-2
60.48	118	24	-265	-150	-210	269	151	37	223	81	-39	218	256	10	512	-5	1	-11	-9	-4	-26	-2	84	51	-11	-47	-3	-41	-17	33	-50	30	13	-15	-109	71	30	91	21	-52	301	-17	-35	13	-12	33	-3	7	-2
73.44	120	20	-278	-160	-207	270	152	37	224	81	-39	220	261	11	516	-6	2	-11	-9	-3	-25	-2	85	50	-11	-47	-4	-43	-18	32	-53	31	12	-16	-107	71	30	90	22	-50	280	-17	-35	7	-14	33	-3	4	-2
93.74	122	20	-303	-193	-203	272	152	38	225	81	-39	223	269	12	523	-7	2	-11	-9	-2	-26	0	87	50	-10	-47	-5	-46	-20	32	-58	35	13	-19	-106	72	31	90	22	-46	271	-16	-37	18	-13	33	-2	2	-1
134.24	126	21	-358	-263	-197	276	153	37	227	81	-40	228	283	14	538	-9	2	-11	-10	0	-26	0	90	49	-10	-47	-8	-52	-23	32	-69	37	13	-23	-104	72	32	89	26	-38	331	-13	-33	7	-12	30	-2	0	-1
174.96	131	20	-425	-339	-188	282	155	38	226	81	-42	234	300	16	555	-11	3	-11	-10	2	-27	3	93	48	-9	-47	-10	-59	-27	30	-80	40	12	-26	-101	72	32	87	28	-29	291	-10	-36	6	-10	34	-9	-7	4
222.64	139	29	-497	-401	-180	289	157	38	227	82	-42	241	320	19	577	-14	3	-10	-11	5	-27	4	97	47	-9	-47	-12	-65	-30	31	-93	44	13	-30	-98	73	34	86	31	-21	318	-6	-36	16	-5	28	1	-8	-5
276.26	146	20	-572	-457	-170	297	158	37	228	82	-43	249	344	21	601	-17	3	-10	-12	7	-28	5	101	46	-8	-47	-17	-73	-34	30	-106	51	15	-34	-96	73	35	84	34	-11	315	-2	-37	4	-6	29	4	-14	-2
330.59	153	17	-646	-504	-158	307	160	38	228	83	-45	257	370	24	627	-20	3	-10	-12	9	-29	7	106	45	-9	-47	-19	-80	-36	30	-118	56	17	-37	-95	74	36	82	36	-3	337	2	-34	4	-3	26	3	-14	-4
377.68	160	9	-696	-538	-149	316	161	37	228	84	-45	264	392	26	652	-22	3	-10	-13	11	-29	7	112	44	-8	-47	-21	-86	-39	30	-129	58	18	-40	-93	74	36	81	38	7	349	6	-36	6	-3	27	3	-20	-2
438.37	169	6	-771	-583	-133	331	163	36	228	88	-47	275	431	30	698	-26	3	-11	-13	13	-30	9	123	43	-9	-47	-25	-97	-44	30	-148	68	19	-47	-90	74	38	78	42	27	376	14	-35	4	3	26	4	-24	-4
507.01	181	-5	-849	-629	-113	352	165	35	228	91	-51	288	477	33	752	-29	5	-11	-13	15	-30	10	137	42	-9	-47	-28	-109	-48	31	-165	79	23	-52	-88	74	39	77	45	51	401	28	-37	7	2	25	8	-30	-5
614.3	200	-23	-956	-693	-80	389	170	32	227	97	-58	316	557	37	864	-30	6	-14	-13	17	-30	12	171	40	-11	-46	-32	-129	-55	33	-194	106	30	-60	-85	73	41	75	52	98	492	56	-33	5	4	24	9	-37	-4
749.03	236	-44	-1082	-767	-34	446	174	29	225	113	-72	361	670	42	1038	-27	9	-18	-12	17	-28	12	233	38	-14	-46	-36	-149	-62	36	-223	151	38	-67	-83	73	43	77	58	154	575	86	-30	11	8	20	12	-45	-2
850.28	272	-63	-1170	-823	13	504	178	26	222	131	-83	414	774	44	1197	-22	12	-21	-11	17	-25	13	291	36	-16	-46	-40	-167	-68	39	-247	195	48	-74	-84	72	45	80	63	211	682	112	-25	4	9	17	13	-53	-2
985.66	329	-93	-1268	-896	90	590	183	22	220	161	-98	500	932	47	1428	-12	17	-25	-10	16	-20	13	373	34	-17	-45	-44	-192	-76	47	-277	252	61	-82	-82	70	46	84	68	294	837	154	-18	15	-27	22	15	-66	0
1133.95	415	-125	-1360	-973	182	699	190	17	217	200	-113	609	1119	52	1686	2	22	-28	-9	19	-16	14	452	31	-16	-45	-48	-216	-83	57	-305	311	74	-92	-78	70	47	89	74	388	987	201	-13	6	3	15	18	-75	0
1241.84	480	-157	-1420	-1027	257	778	194	14	216	227	-122	690	1258	55	1865	13	25	-30	-9	20	-13	15	502	30	-16	-45	-51	-233	-89	66	-325	349	82	-98	-78	69	48	91	77	456	1092	233	-12	9	0	16	17	-85	0
1322.89	527	-162	-1461	-1068	319	835	197	12	214	247	-128	750	1362	58	1998	21	28	-31	-9	22	-12	16	537	29	-15	-45	-52	-247	-93	72	-339	374	90	-103	-77	69	50	93	80	509	1191	257	-7	10	4	12	18	-88	2
1383.7	567	-178	-1494	-1100	373	883	200	10	214	263	-133	797	1447	60	2104	27	30	-32	-9	23	-11	16	562	28	-15	-45	-54	-258	-97	77	-351	395	93	-108	-76	68	50	94	81	552	1239	278	-6	10	5	13	20	-93	1
1438.02	598	-187	-1521	-1126	417	919	202	10	214	275	-136	832	1512	62	2184	32	31	-33	-9	23	-10	16	581	27	-15	-45	-55	-265	-99	80	-360	409	99	-111	-75	67	51	95	83	584	1282	294	-5	4	4	11	20	-94	0
1478.52	623	-202	-1541	-1148	455	948	203	8	214	286	-139	862	1568	63	2253	35	32	-34	-9	24	-9	17	596	27	-15	-46	-56	-272	-101	83	-368	422	102	-114	-75	68	51	96	85	612	1315	302	-5	3	2	11	19	-99	2
1512.59	642	-211	-1557	-1164	487	972	205	8	213	294	-141	886	1614	64	2312	39	33	-34	-9	24	-8	17	611	25	-15	-45	-58	-279	-103	86	-376	432	105	-117	-74	67	52	97	86	642	1359	319	-4	15	3	12	22	-101	3
1566.05	674	-219	-1579	-1188	543	1008	206	6	212	308	-144	927	1688	67	2405	45	35	-35	-9	26	-7	17	630	24	-14	-46	-59	-288	-107	91	-386	449	110	-120	-73	67	53	98	87	679	1424	336	-5	3	6	11	24	-102	3
1606.66	700	-225	-1599	-1210	592	1040	208	5	213	319	-146	961	1754	68	2489	49	37	-36	-9	27	-6	18	649	24	-14	-46	-60	-297	-110	95	-397	466	114	-125	-72	67	53	99	89	720	1489	360	-3	5	8	11	23	-107	3
1667.36	736	-249	-1624	-1238	655	1080	210	3	213	332	-149	1003	1828	70	2577	55	39	-36	-8	27	-6	18	666	23	-14	-45	-62	-305	-112	99	-404	478	119	-128	-70	68	54	100	92	745	1517	368	-2	16	3	11	24	-113	1
1694.14	749	-245	-1637	-1250	673	1092	211	2	212	338	-150	1016	1851	71	2606	56	39	-38	-8	28	-6	18	672	23	-14	-46	-62	-308	-113	100	-409	485	121	-129	-71	67	54	100	92	765	1549	380	-2	5	7	7	26	-116	3
1714.34	772	-261	-1651	-1267	716	1118	212	2	212	347	-152	1044	1900	73	2667	60	40	-38	-9	29	-5	19	683	22	-14	-46	-63	-313	-114	103	-413	490	122	-131	-70	68	54	101	93	780	1568	381	-2	4	3	9	24	-117	5
1707.86	773	-256	-1654	-1267	713	1120	213	2	212	349	-152	1045	1900	72	2666	59	40	-38	-9	29	-5	19	684	22	-14	-46	-63	-313	-114	103	-413	492	123	-130	-70	68	54	100	93	781	1570	379	-2	4	6	8	24	-115	2
1701.43	774	-258	-1654	-1268	712	1121	213	2	214	350	-151	1046	1900	72	2667	59	40	-38	-8	29	-5	19	685	22	-13	-46	-62	-313	-114	103	-413	490	123	-130	-71	68	55	100	93	783	1572	379	-2	10	4	9	24	-117	1
1721.74	775	-254	-1658	-1271	714	1122	213	2	214	351	-152	1048	1905	72	2673	60	40	-38	-9	29	-5	19	686	23	-14	-46	-63	-314	-115	103	-415	490	123	-131	-70	68	54	100	93	786	1581	381	-1	3	6	8	24	-117	2
1741.93	782	-261	-1665	-1280	732	1131	213	1	214	353	-154	1059	1929	73	2705	61	41	-39	-8	28	-5	19	690	22	-14	-46	-63	-318	-116	104	-419	496	125	-132	-70	68	55	101	94	803	1610	392	0	15	5	10	24	-118	3
1782.38	800	-273	-1679	-1296	772	1152	215	0	214	360	-155	1085	1982	74	2772	65	41	-39	-8	29	-4	19	701	22	-14	-45	-65	-327	-119	108	-429	507	129	-136	-68	67	55	102	96	836	1667	418	1	3	4	6	25	-121	5
1836	833	-283	-1699	-1320	834	1188	217	-1	213	374	-158	1127	2058	78	2868	71	43	-40	-8	30	-2	20	719	21	-13	-46	-66	-337	-122	113	-440	522	134	-140	-67	67	56	104	98	872	1723	438	3	11	5	8	26	-125	2
1896.8	866	-293	-1720	-1344	890	1220	219	-2	214	386	-160	1166	2127	80	2957	75	45	-41	-8	31	-1	21	734	20	-13	-45	-68	-345	-124	118	-450	538	139	-143	-67	67	57	105	100	905	1776	458	3	5	6	6	28	-130	4
1944.54	896	-310	-1743	-1368	943	1252	221	-4	216	400	-162	1205	2194	82	3039	81	46	-42	-8	32	0	21	748	19	-13	-45	-69	-353	-128	123	-460	549	143	-146	-66	67	57	106	100	940	1821	478	4	3	5	5	30	-134	4
1991.63	924	-319	-1762	-1387	984	1279	223	-5	216	412	-165	1240	2253	83	3113	85	47	-43	-7	32	1	21	761	19	-13	-46	-70	-361	-130	127	-467	561	147	-149	-65	67	58	107	102	969	1880	498	5	5	6	5	29	-137	4
2038.66	954	-329	-1782	-1407	1024	1306	226	-6	215	427	-167	1276	2311	85	3185	89	48	-44	-7	32	3	21	774	18	-13	-46	-71	-368	-132	131	-475	575	152	-152	-64	66	58	108	104	999	1916	513	4	12	6	5	29	-139	6
2080.3	981	-340	-1803	-1428	1055	1331	228	-7	215	444	-170	1315	2367	86	3254	92	49	-44	-6	32	3	21	787	18	-14	-45	-72	-376	-135	136	-483	589	157	-155	-64	66	59	107	105	1029	1971	528	4	4	6	5	33	-142	5
2126.95	1017	-349	-1823	-1449	1083	1363	230	-8	213	466	-173	1365	2436	88	3338	96	51	-45	-7	34	6	22	806	17	-12	-46	-74	-384	-137	143	-492	612	163	-159	-62	66	59	107	107	1067	2025	549	5	4	7	5	29	-145	5
2160.32	1050	-361	-1841	-1467	1122	1391	232	-10	212	487	-176	1410	2489	90	3406	100	53	-45	-7	34	6	22	822	17	-12	-46	-74	-390	-139	150	-499	635	168	-161	-61	65	60	105	107	1090	2060	559	5	4	4	3	30	-146	4
2173.99	1068	-368	-1849	-1474	1140	1403	233	-10	212	504	-178	1434	2510	89	3444	102	52	-45	-7	34	7	22	832	16	-13	-46	-72	-393	-140	154	-502	651	171	-163	-62	65	60	104	108	1104	2081	566	4	12	2	3	32	-147	6
2173.99	1080	-371	-1856	-1480	1152	1412	236	-10	211	516	-180	1451	2524	90	3498	103	53	-45	-6	33	7	22	839	16	-13	-46	-72	-394	-140	158	-504	672	173	-161	-60	65	60	103	108	1113	2090	567	5	3	1	4	30	-147	6
2153.68	1104	-355	-1874	-1494	1158	1428	270	-10	197	552	-183	1480	2546	90	3641	102	59	-44	-6	32	8	22	858	17	-15	-46	-70	-398	-140	165	-509	717	182	-161	-62	66	61	100	111	1130	2120	563	5	4	5	6	32	-140	10
2153.68	1130	-344	-1869	-1487	1158	1434	403	-10	200	553	-183	1481	2546	90	3649	102	59	-44	-6	32	8	23	858	17	-15	-46	-69	-398	-140	167	-509	715	183	-161	-63	66	61	100	111	1130	2124	563	4	5	6	5	33	-141	11
2147.15	1130	-358	-1870	-1491	1157	1434	358	-11	200	555	-183	1482	2546	90	3656	102	59	-44	-6	32	8	22	859	17	-15	-46	-69	-398	-139	168	-509	719	183	-161	-62	66	61	103	111	1131	2123	595	5	6	6	6	32	-141	10
2147.15	1137	-349	-1861	-1489	1158	1437	285	-11	202	556	-184	1482	2547	90	3661	100	59	-43	-9	32	8	22	859	18	-13	-46	-69	-398	-139	169	-509	721	184	-161	-62	66	61	103	111	1131	2123	594	5	9	6	8	34	-138	12
2160.7	1133	-366	-1868	-1492	1157	1436	281	-10	201	558	-184	1484	2548	90	3669	100	59	-43	-6	32	8	22	860	17	-15	-46	-69	-398	-140	168	-510	723	184	-161	-62	66	61	103	111	1132	2125	592	6	8	6	7	32	-140	12
2147.15	1127	-352	-1875	-1503	1163	1443	255	-10	194	570	-184	1496	2561	91	3712	102	59	-44	-6	32	8	22	866	18	-15	-46	-68	-400	-139	169	-512	734	185	-161	-63	65	61	101	111	1135	2134	590	4	1	3	3	28	-144	8
2140.02	1126	-359	-1877	-1504	1161	1443	253	-10	193	572	-184	1497	2561	91	3717	102	59	-44	-6	31	9	22	867	17	-15	-47	-68	-399	-139	170	-511	735	185	-161	-62	65	61	101	112	1134	2128	589	6	3	3	4	28	-144	8
2153.74	1127	-355	-1879	-1506	1160	1445	251	-10	190	575	-185	1499	2561	91	3725	100	59	-43	-6	32	9	23	868	18	-15	-47	-68	-399	-139	171	-512	739	187	-161	-62	65	62	101	112	1133	2132	588	7	3	6	4	29	-140	9
2153.63	1127	-361	-1881	-1507	1158	1446	250	-10	192	578	-185	1500	2561	91	3729	100	59	-43	-6	32	8	22	869	17	-15	-47	-67	-399	-139	171	-512	739	187	-161	-62	65	62	100	111	1132	2137	587	8	2	3	5	28	-141	9
2160.27	1149	-360	-1896	-1529	1262	1461	273	-11	187	599	-187	1527	2598	92	3836	102	59	-42	-5	32	10	23	880	17	-15	-47	-67	-404	-140	175	-516	755	192	-163	-53	353	71	148	113	1144	2161	597	35	2	5	2	28	-144	9
2153.68	1149	-365	-1899	-1530	1244	1459	270	-11	185	601	-188	1527	2598	92	3847	100	59	-42	-5	32	10	23	881	18	-17	-46	-67	-404	-140	176	-516	758	192	-163	-52	351	71	147	114	1143	2162	595	34	5	5	4	29	-144	12
2147.15	1149	-369	-1899	-1530	1242	1458	269	-12	188	601	-188	1528	2598	92	3850	100	59	-42	-5	32	9	23	881	18	-15	-46	-67	-404	-140	177	-516	758	194	-163	-53	350	69	147	114	1143	2174	595	34	19	4	5	29	-143	13
2133.49	1149	-363	-1899	-1530	1239	1458	269	-11	188	602	-188	1528	2596	91	3848	100	59	-42	-6	33	9	23	881	18	-15	-46	-66	-403	-140	177	-515	758	193	-161	-53	349	71	147	113	1140	2169	592	34	5	6	6	29	-142	9
1977.86	1146	-365	-1896	-1525	1230	1454	269	-11	190	601	-188	1524	2584	91	3835	100	59	-42	-5	33	9	23	880	18	-17	-46	-66	-401	-139	177	-511	757	192	-160	-54	349	69	147	112	1134	2159	587	34	13	2	4	27	-142	8
1916.89	1136	-355	-1882	-1508	1197	1442	267	-10	191	598	-186	1508	2536	89	3775	98	57	-41	-6	33	9	23	875	19	-14	-46	-64	-390	-135	174	-497	746	188	-155	-54	348	68	146	110	1100	2090	553	31	6	3	4	27	-140	9
1762.13	1086	-323	-1837	-1451	1079	1391	263	-6	193	589	-181	1443	2373	85	3565	89	54	-36	-7	35	7	23	856	21	-12	-47	-57	-362	-125	165	-464	716	175	-145	-56	350	65	142	103	1007	1929	471	28	14	2	5	22	-128	7
1539.22	991	-269	-1765	-1358	891	1300	257	-2	197	568	-173	1339	2150	82	3283	73	51	-33	-10	38	3	24	829	25	-7	-48	-52	-333	-114	153	-430	675	159	-134	-56	351	63	139	97	900	1749	389	25	6	4	7	23	-115	6
1370.52	906	-232	-1698	-1273	721	1207	251	3	206	544	-164	1234	1939	79	3009	57	49	-30	-12	41	-1	25	792	28	-18	-49	-46	-302	-103	141	-396	624	142	-123	-56	353	61	136	92	779	1557	322	20	17	4	8	17	-106	5
1160.57	808	-193	-1619	-1177	546	1092	245	8	209	513	-151	1118	1720	75	2726	41	47	-26	-14	42	-5	26	748	31	0	-49	-41	-273	-94	127	-365	564	125	-113	-57	354	59	134	87	670	1388	249	12	5	6	11	17	-92	1
1012.12	717	-155	-1546	-1090	404	970	240	12	212	477	-139	1007	1523	72	2468	27	44	-23	-15	44	-9	27	688	33	4	-50	-37	-246	-85	116	-336	501	111	-101	-57	355	58	133	83	567	1234	189	7	19	7	11	15	-83	1
904.28	638	-125	-1485	-1021	295	854	237	15	215	441	-128	911	1360	68	2255	15	41	-21	-16	40	-13	25	617	36	6	-51	-34	-223	-78	101	-311	438	97	-92	-61	354	57	132	79	472	1084	139	2	7	9	14	14	-72	-1
742.23	527	-85	-1396	-923	149	700	229	20	217	375	-111	759	1112	58	1926	-2	32	-17	-14	31	-18	21	473	39	-2	-50	-30	-187	-67	82	-265	328	75	-77	-69	352	54	131	69	337	865	106	-5	16	6	15	11	-59	0
566.35	417	-44	-1269	-801	15	560	221	26	220	298	-92	606	863	47	1598	-13	23	-13	-13	24	-22	17	325	42	-4	-50	-24	-147	-55	62	-214	212	54	-61	-74	351	50	130	58	216	671	76	-11	6	4	18	7	-45	-2
404.19	314	6	-1083	-661	-97	443	209	30	223	223	-74	477	654	36	1339	-16	16	-9	-12	18	-24	13	225	45	-5	-50	-19	-116	-45	51	-169	134	39	-49	-81	349	48	130	49	118	541	47	-15	19	2	24	5	-29	-1
249.21	246	24	-888	-532	-163	369	200	33	224	169	-61	386	500	26	1160	-13	11	-7	-12	11	-25	8	156	48	-7	-50	-12	-86	-35	43	-122	76	28	-34	-88	348	44	132	39	36	430	28	-17	8	-4	29	2	-15	-1
127.66	201	43	-689	-411	-205	324	192	34	225	137	-52	324	398	18	1049	-9	9	-7	-9	4	-26	5	119	51	-9	-50	-6	-64	-27	39	-85	42	20	-23	-93	347	41	133	31	-13	367	10	-18	20	-5	29	-1	-6	-1
5.99	162	40	-458	-251	-234	293	186	34	224	113	-45	278	330	11	975	-6	7	-7	-8	-1	-25	2	100	52	-12	-49	-2	-52	-20	38	-63	29	18	-17	-97	345	39	134	27	-41	333	4	-18	16	-8	32	-3	2	0
-0.54	151	40	-369	-194	-239	284	184	34	224	104	-44	265	310	10	948	-4	7	-7	-8	-2	-26	0	96	53	-10	-48	-1	-47	-19	37	-55	26	15	-15	-99	345	39	134	26	-52	315	0	-16	10	-9	33	-1	6	1
-0.54	144	39	-320	-167	-241	279	182	34	224	99	-43	257	298	8	928	-4	7	-7	-7	-3	-26	0	93	53	-10	-47	-1	-44	-17	37	-51	26	15	-14	-99	344	38	134	26	-60	298	-2	-14	8	-10	34	-3	7	0
-0.49	139	39	-296	-158	-240	277	182	34	224	96	-43	253	292	7	918	-3	6	-8	-7	-3	-25	0	92	53	-12	-47	0	-43	-17	37	-49	27	15	-13	-99	343	38	134	24	-64	295	-3	-13	19	-10	33	-2	8	2
-0.54	137	45	-277	-150	-240	276	181	34	224	94	-42	250	287	7	907	-3	6	-8	-7	-3	-26	0	92	53	-9	-47	0	-42	-16	36	-46	28	15	-12	-101	343	38	134	24	-68	286	-3	-13	11	-8	36	0	12	4
19.76	133	41	-259	-146	-239	273	178	34	223	91	-42	247	283	6	898	-3	6	-8	-7	-4	-26	-2	91	53	-11	-46	0	-42	-16	36	-46	30	14	-12	-102	341	38	134	22	-71	295	-4	-13	9	-11	34	-2	10	2
60.43	133	39	-263	-147	-235	273	177	34	224	89	-42	248	284	7	896	-3	6	-7	-7	-4	-26	0	92	53	-11	-46	0	-42	-17	36	-47	34	15	-13	-101	340	38	134	23	-70	302	-5	-14	9	-11	35	-1	10	2
93.74	136	48	-283	-162	-231	275	177	34	225	89	-43	251	292	8	902	-4	6	-8	-7	-3	-26	0	94	52	-12	-46	-2	-46	-19	36	-54	35	15	-16	-99	338	39	133	26	-66	308	-3	-14	7	-8	37	-1	8	-2
121.23	143	38	-350	-242	-221	280	179	34	226	90	-43	258	310	11	921	-7	7	-7	-8	1	-26	2	98	51	-11	-45	-5	-53	-23	35	-67	40	16	-21	-97	340	40	131	29	-55	322	1	-15	9	-8	34	-1	5	1
188.62	151	40	-455	-361	-211	289	181	34	228	90	-44	268	337	15	950	-11	7	-8	-9	5	-27	5	104	49	-9	-45	-8	-66	-29	34	-89	48	17	-27	-93	340	42	129	34	-37	343	7	-14	8	-6	32	0	2	-3
283.55	167	40	-613	-487	-188	307	185	35	230	93	-45	286	392	21	1009	-18	8	-7	-10	10	-29	8	115	47	-8	-45	-16	-82	-36	34	-121	62	20	-36	-87	341	44	125	40	-13	378	17	-13	20	-2	30	3	-11	1
398.25	184	28	-755	-575	-164	329	187	33	231	96	-48	305	444	25	1075	-24	8	-8	-11	13	-30	10	128	45	-8	-46	-20	-95	-41	34	-140	71	23	-42	-85	340	46	123	44	3	403	23	-14	14	2	29	5	-18	0
458.62	194	18	-830	-620	-146	344	188	32	233	99	-51	318	482	29	1129	-27	8	-9	-11	15	-30	11	137	44	-7	-46	-23	-105	-45	34	-155	80	25	-47	-83	340	46	121	47	20	426	31	-13	6	3	26	5	-23	0
533.14	208	13	-912	-669	-128	367	191	31	232	103	-55	333	527	31	1199	-29	9	-10	-12	17	-30	12	151	43	-11	-45	-25	-115	-48	35	-170	95	29	-52	-82	338	47	119	50	38	450	41	-13	16	5	26	7	-29	0
586.82	220	-4	-969	-701	-112	386	191	30	231	108	-58	346	563	33	1249	-31	10	-11	-11	17	-30	12	163	42	-10	-46	-27	-122	-51	36	-180	98	31	-54	-81	338	48	118	52	53	469	48	-12	4	4	26	8	-34	-2
630.02	231	-8	-1014	-730	-99	403	192	28	230	114	-63	361	602	35	1310	-31	11	-12	-12	18	-30	13	182	41	-12	-46	-30	-132	-55	37	-195	115	34	-59	-80	336	48	117	55	80	510	66	-9	6	6	25	8	-37	-1
701.89	252	-22	-1084	-770	-72	432	194	27	229	124	-69	388	661	37	1401	-32	12	-14	-11	17	-29	13	213	40	-14	-46	-32	-142	-58	38	-209	139	39	-62	-79	336	49	118	57	105	552	80	-9	8	7	25	10	-41	0
756.16	268	-35	-1132	-799	-55	456	196	25	230	134	-75	410	703	38	1466	-32	13	-16	-11	17	-29	13	236	39	-14	-46	-33	-149	-60	39	-220	153	41	-65	-79	335	50	118	59	125	577	88	-9	13	7	22	10	-45	0
789.48	282	-42	-1163	-818	-41	474	197	24	228	141	-79	426	735	39	1515	-31	13	-16	-11	17	-28	13	254	39	-14	-46	-34	-153	-62	40	-227	166	44	-67	-79	334	50	119	59	140	602	95	-8	18	5	21	10	-49	-1
816.97	294	-45	-1188	-834	-29	488	198	24	228	148	-82	442	762	40	1554	-30	14	-17	-11	17	-27	13	268	39	-16	-46	-35	-157	-63	42	-233	178	47	-68	-79	334	50	119	62	153	627	100	-7	6	7	22	12	-48	1
843.8	305	-52	-1210	-850	-16	504	199	23	226	155	-85	458	791	41	1599	-29	15	-18	-10	17	-26	13	287	39	-16	-46	-36	-163	-65	43	-240	194	50	-70	-78	333	51	120	64	171	657	109	-6	13	5	22	13	-50	1
884.36	321	-59	-1240	-872	4	527	200	21	225	166	-91	484	835	41	1660	-27	16	-19	-10	17	-26	13	311	37	-17	-46	-37	-171	-69	44	-249	211	54	-73	-78	332	51	120	65	192	701	117	-4	13	7	22	12	-53	3
931.34	343	-69	-1273	-896	31	554	202	20	224	179	-96	515	885	43	1727	-25	18	-21	-10	16	-24	13	337	37	-18	-46	-39	-178	-71	46	-258	230	59	-75	-78	331	52	121	67	217	742	130	-3	6	5	21	12	-58	0
971.84	365	-78	-1306	-920	59	583	204	19	223	192	-101	545	936	43	1798	-21	19	-22	-9	16	-23	13	363	36	-19	-46	-40	-187	-74	49	-268	252	63	-78	-78	330	52	122	68	244	795	143	0	14	4	21	13	-60	3
1026.16	394	-87	-1343	-952	94	622	207	17	223	209	-108	593	1012	45	1905	-16	22	-24	-9	16	-22	13	403	35	-19	-45	-41	-198	-77	54	-282	286	71	-82	-78	329	53	124	71	286	873	166	3	6	5	20	13	-62	2
1092.15	431	-102	-1380	-985	132	668	210	16	223	229	-114	642	1089	47	2011	-11	24	-25	-9	17	-20	14	440	34	-19	-45	-43	-209	-81	59	-294	316	77	-86	-77	329	54	125	73	331	948	187	6	19	4	17	15	-68	3
1194.8	503	-118	-1435	-1038	211	752	215	12	220	267	-126	741	1246	51	2224	1	28	-27	-8	20	-17	15	511	32	-19	-45	-46	-232	-87	75	-322	386	91	-96	-72	329	55	126	79	425	1102	232	10	6	4	15	16	-76	3
1309.88	583	-143	-1495	-1097	303	843	220	9	218	308	-136	843	1408	55	2429	13	33	-30	-8	22	-14	16	572	30	-16	-45	-48	-253	-94	87	-344	439	103	-103	-71	327	57	127	83	507	1223	269	13	7	3	13	18	-82	3
1377.22	631	-163	-1531	-1135	367	898	224	8	219	333	-142	904	1510	58	2555	21	34	-31	-8	23	-12	16	608	29	-16	-45	-50	-267	-98	95	-359	478	111	-109	-70	326	57	128	86	569	1320	302	15	16	4	14	18	-86	5
1512.54	720	-200	-1593	-1203	504	1002	231	3	216	382	-152	1022	1710	63	2805	36	40	-33	-8	25	-9	18	672	27	-13	-45	-53	-292	-106	110	-389	543	126	-120	-69	325	59	128	90	676	1480	355	18	6	1	9	19	-97	4
1613.09	788	-229	-1640	-1257	613	1076	235	0	215	416	-159	1105	1850	66	2968	45	42	-34	-8	26	-7	19	709	24	-16	-45	-55	-308	-111	120	-405	577	134	-125	-67	324	60	129	94	734	1559	383	19	10	0	9	19	-105	5
1653.7	818	-235	-1663	-1280	658	1107	238	0	215	433	-162	1144	1919	69	3055	50	45	-35	-8	28	-6	19	727	24	-14	-45	-56	-315	-113	125	-414	597	139	-128	-65	324	61	129	95	769	1612	397	20	7	2	10	21	-107	6
1681.18	838	-245	-1673	-1291	684	1125	238	-1	215	444	-162	1156	1933	70	3067	51	44	-35	-8	28	-5	19	731	24	-13	-46	-56	-316	-113	126	-414	594	139	-129	-66	324	61	129	95	774	1615	396	20	16	3	8	20	-108	5
1667.36	838	-245	-1676	-1293	682	1126	238	-1	215	446	-162	1157	1933	69	3066	50	44	-35	-8	28	-6	19	732	24	-14	-45	-56	-317	-113	125	-414	593	139	-129	-66	324	61	128	95	775	1613	394	20	4	1	9	20	-109	5
1660.82	839	-244	-1677	-1293	680	1127	238	0	215	448	-163	1157	1933	70	3066	51	44	-34	-8	28	-5	19	731	24	-14	-45	-56	-317	-113	125	-414	592	139	-129	-66	323	61	128	95	776	1613	393	19	16	2	6	20	-109	4
1653.64	841	-245	-1678	-1294	678	1128	239	0	215	449	-162	1157	1933	69	3066	50	44	-34	-8	28	-6	19	732	24	-16	-46	-56	-317	-114	126	-416	595	140	-129	-66	323	61	129	95	782	1619	397	19	18	2	8	20	-108	6
1694.2	846	-245	-1685	-1302	690	1135	239	-1	216	451	-163	1166	1950	70	3086	51	44	-35	-8	27	-5	19	736	23	-16	-46	-57	-319	-115	126	-417	595	141	-129	-66	322	61	129	96	786	1632	399	18	3	3	8	20	-109	5
1714.39	857	-255	-1695	-1314	714	1148	240	-1	214	457	-164	1186	1989	71	3139	54	45	-36	-8	28	-5	19	745	23	-16	-45	-58	-327	-117	131	-426	610	145	-133	-65	322	61	129	97	820	1684	423	19	17	0	7	21	-111	5
1782.38	898	-271	-1716	-1343	789	1191	242	-3	213	475	-168	1239	2080	73	3251	61	47	-38	-8	29	-3	20	766	22	-11	-45	-59	-339	-121	139	-440	637	151	-138	-64	321	62	129	99	872	1767	466	20	3	0	7	20	-115	6
1843.24	937	-281	-1739	-1372	861	1233	245	-5	208	495	-171	1288	2168	77	3361	67	49	-39	-7	29	-2	20	787	21	-10	-46	-60	-350	-124	146	-453	664	158	-142	-63	321	63	130	101	917	1842	488	23	15	1	6	22	-119	8
1910.63	979	-299	-1767	-1403	936	1276	250	-7	209	517	-175	1343	2263	80	3483	74	51	-40	-7	31	0	21	811	20	-13	-45	-62	-362	-128	153	-466	690	164	-147	-60	321	64	131	104	969	1914	513	25	13	1	6	24	-124	7
1977.86	1024	-317	-1794	-1433	1011	1321	252	-9	209	539	-178	1399	2356	83	3601	81	53	-41	-7	32	2	22	833	19	-13	-45	-63	-375	-132	161	-479	716	171	-152	-59	320	65	132	106	1020	2005	539	27	5	1	4	24	-130	6
2053.84	1074	-335	-1825	-1469	1094	1369	254	-10	205	565	-183	1463	2460	86	3738	88	54	-42	-7	32	4	22	856	18	-13	-45	-65	-388	-136	169	-495	746	180	-157	-58	319	66	132	108	1075	2084	567	28	5	2	5	25	-135	7
2127.01	1120	-355	-1858	-1504	1171	1413	258	-13	194	594	-187	1526	2557	88	3872	93	57	-43	-6	33	7	22	879	17	-14	-45	-66	-401	-140	177	-509	781	189	-163	-57	319	67	132	111	1131	2158	596	28	7	1	4	27	-139	8
2200.77	1174	-377	-1887	-1537	1257	1461	263	-15	188	629	-191	1601	2666	92	4025	100	59	-46	-7	35	9	23	909	16	-13	-45	-66	-415	-143	190	-526	833	198	-169	-54	320	67	131	112	1194	2255	627	29	14	0	4	28	-143	9
2248.56	1218	-391	-1910	-1562	1329	1502	268	-16	190	661	-194	1659	2744	95	4175	102	61	-46	-7	36	11	23	934	15	-13	-46	-64	-423	-144	198	-532	873	205	-170	-53	319	68	129	113	1225	2293	631	28	18	0	4	27	-145	10
2241.32	1233	-394	-1917	-1567	1340	1512	270	-17	187	676	-196	1672	2751	94	4295	100	60	-45	-7	36	11	23	944	15	-13	-46	-64	-423	-143	200	-532	889	207	-170	-55	319	68	128	113	1228	2275	627	26	4	0	3	26	-146	9
2228.36	1237	-391	-1920	-1570	1340	1517	271	-17	189	683	-197	1675	2752	95	4340	100	60	-45	-7	35	11	23	948	15	-13	-46	-62	-423	-143	202	-532	892	210	-169	-55	319	68	128	114	1228	2294	624	25	6	1	4	26	-144	11
2248.51	1311	-405	-1976	-1630	1406	1605	338	-15	178	770	-206	1771	2874	101	4912	104	60	-42	-8	34	12	22	997	13	-17	-48	-61	-435	-145	208	-547	939	232	-173	-55	308	67	119	112	1269	2377	627	27	0	-4	3	24	-146	12
2241.27	1312	-409	-1976	-1630	1404	1606	334	-15	182	771	-206	1772	2874	101	4918	104	60	-42	-8	34	12	22	997	14	-17	-48	-61	-435	-144	208	-546	941	233	-173	-55	308	68	119	113	1268	2381	626	27	4	-3	2	25	-144	12
2228.36	1312	-404	-1980	-1632	1399	1608	333	-14	177	776	-206	1773	2875	101	4934	104	60	-41	-7	34	12	22	999	13	-17	-48	-61	-435	-144	207	-546	941	234	-173	-56	307	67	118	112	1273	2375	667	26	2	-3	3	22	-148	13
2214.59	1306	-407	-1982	-1634	1396	1608	339	-14	184	779	-207	1774	2874	101	4944	104	59	-41	-8	34	12	21	1000	14	-17	-49	-61	-434	-143	207	-546	941	235	-173	-56	307	67	118	112	1272	2376	662	25	0	-5	0	21	-148	11
2167.51	1304	-412	-1989	-1639	1382	1611	334	-13	187	788	-207	1774	2873	100	4971	103	59	-39	-8	34	12	22	1003	14	-18	-48	-61	-432	-143	206	-545	940	238	-172	-57	304	68	116	112	1263	2373	650	30	-2	-6	-1	20	-147	10
2160.22	1303	-413	-1990	-1640	1381	1610	333	-13	189	788	-207	1775	2872	100	4972	103	59	-39	-8	34	12	22	1004	14	-17	-49	-60	-432	-143	206	-545	942	239	-172	-56	304	68	116	113	1263	2355	649	26	0	-2	0	18	-147	11
2153.68	1304	-416	-1991	-1641	1378	1611	333	-13	193	790	-207	1775	2872	100	4975	103	58	-39	-8	34	12	22	1004	14	-17	-49	-61	-431	-143	206	-544	940	240	-172	-56	303	68	116	113	1262	2368	648	26	0	-7	-1	20	-146	11
2208.06	1306	-412	-1996	-1644	1372	1613	332	-11	191	795	-207	1776	2875	101	4992	103	59	-38	-7	34	12	22	1006	14	-17	-49	-60	-431	-142	206	-544	939	242	-171	-54	301	68	116	113	1258	2372	645	29	0	-4	0	19	-148	9
2208.06	1305	-418	-1996	-1644	1371	1613	331	-11	195	795	-207	1776	2875	101	4993	103	59	-38	-8	34	12	22	1006	14	-17	-48	-60	-431	-142	207	-544	940	241	-171	-55	301	68	116	113	1257	2375	645	27	1	-5	-1	21	-146	9
2200.72	1305	-418	-1996	-1644	1371	1613	333	-11	197	795	-207	1777	2875	101	4994	103	59	-38	-8	34	12	22	1006	14	-17	-48	-60	-431	-142	207	-544	940	242	-171	-56	301	68	116	113	1257	2372	646	27	5	-5	0	19	-146	13
2200.72	1305	-420	-1996	-1644	1370	1613	332	-11	195	796	-207	1776	2874	101	4994	103	59	-38	-8	34	12	22	1006	14	-17	-48	-60	-431	-142	207	-544	942	241	-171	-55	301	68	115	113	1256	2367	645	27	3	-5	-2	21	-146	9
2089.85	1303	-418	-1995	-1642	1365	1611	331	-11	199	795	-207	1774	2868	101	4987	103	58	-38	-8	34	12	21	1005	14	-17	-49	-60	-429	-142	207	-542	937	241	-171	-56	300	68	115	113	1249	2372	639	25	7	-6	2	20	-145	10
1930.72	1279	-389	-1965	-1603	1290	1578	328	-8	205	787	-203	1729	2750	97	4837	97	55	-34	-8	35	11	22	989	16	-14	-49	-54	-401	-131	194	-506	900	226	-157	-58	302	65	115	106	1147	2188	543	21	9	-3	-2	17	-137	9
1627.67	1159	-325	-1874	-1481	1039	1449	320	-1	210	747	-192	1577	2432	91	4450	77	52	-29	-12	40	5	23	949	20	-8	-50	-47	-358	-117	172	-459	822	201	-142	-59	306	61	114	98	988	1919	422	17	6	-4	4	13	-123	6
1282.23	990	-250	-1760	-1325	714	1261	308	7	214	678	-173	1360	2035	85	3957	51	48	-24	-16	46	-4	26	874	25	0	-52	-38	-302	-99	142	-397	685	163	-122	-59	310	58	113	90	763	1567	269	9	6	1	4	9	-103	2
1052.78	841	-194	-1654	-1190	466	1070	297	13	219	603	-154	1174	1725	79	3571	30	44	-19	-18	45	-12	26	777	30	1	-53	-33	-260	-86	115	-350	552	134	-103	-63	311	56	114	81	581	1280	161	2	16	4	6	9	-89	1
755.89	614	-115	-1509	-1006	157	764	281	21	228	451	-120	861	1234	59	2956	0	29	-13	-16	30	-23	19	501	36	-6	-53	-27	-189	-67	75	-266	324	86	-76	-75	310	51	117	64	336	851	84	-11	18	3	12	4	-64	-1
478.6	410	-34	-1284	-793	-76	533	260	29	234	296	-88	605	848	42	2484	-11	16	-8	-14	20	-28	13	293	41	-8	-53	-20	-136	-50	51	-195	165	55	-55	-84	309	46	120	50	161	601	43	-13	4	3	19	-1	-39	-3
262.98	279	23	-1003	-593	-211	395	245	33	234	190	-66	436	588	26	2180	-7	9	-5	-12	10	-30	7	175	45	-10	-52	-11	-93	-37	38	-129	75	34	-35	-93	308	41	123	37	39	452	14	-11	16	0	20	-2	-23	-4
107.24	200	45	-700	-410	-278	326	234	34	232	134	-55	344	446	16	2026	-1	5	-5	-10	2	-30	3	128	48	-11	-52	-5	-68	-27	34	-86	38	26	-24	-99	306	38	126	29	-24	385	-7	-16	7	-3	28	-4	-7	-3
19.6	168	35	-508	-281	-302	300	229	35	232	112	-49	304	386	10	1962	3	3	-5	-9	-1	-30	0	110	50	-12	-51	-2	-56	-22	33	-66	25	22	-19	-102	306	36	126	25	-51	349	-13	-18	8	-9	27	-4	2	-1
-0.59	152	34	-400	-215	-308	289	227	34	232	99	-47	286	360	8	1933	4	3	-5	-9	-4	-30	-2	105	50	-13	-50	0	-51	-19	33	-57	24	19	-16	-104	306	35	127	24	-66	342	-17	-17	8	-10	31	-8	3	-1
-0.59	146	32	-348	-189	-308	284	223	34	232	94	-46	278	348	6	1920	7	2	-6	-9	-4	-30	-3	103	50	-11	-50	0	-49	-19	32	-53	25	18	-15	-106	305	35	127	22	-73	335	-20	-18	15	-12	31	-7	5	-3
-0.54	141	35	-318	-177	-307	282	222	34	232	90	-45	273	339	6	1913	7	3	-6	-8	-5	-30	-3	102	51	-13	-49	1	-47	-18	32	-49	26	18	-14	-106	305	35	127	21	-78	339	-21	-19	6	-11	32	-8	6	0
-0.54	137	36	-284	-167	-303	279	222	34	232	85	-45	268	330	5	1904	8	2	-6	-8	-5	-30	-3	101	51	-13	-48	1	-45	-17	33	-46	30	16	-13	-107	304	35	127	20	-84	327	-22	-20	6	-12	30	-8	8	-2
40.01	135	33	-275	-165	-300	278	221	34	231	83	-45	267	328	5	1902	8	3	-6	-8	-5	-31	-3	101	51	-13	-48	1	-45	-17	33	-47	31	17	-13	-107	304	35	127	20	-84	334	-22	-21	6	-13	33	-3	6	0
66.85	136	34	-282	-167	-296	279	221	34	232	83	-45	268	331	6	1905	7	3	-6	-8	-4	-30	-3	102	50	-12	-48	1	-47	-18	33	-48	22	12	-15	-106	304	35	126	22	-84	327	-23	-21	17	-12	34	-7	5	2
87.16	138	31	-308	-185	-290	280	222	34	232	82	-45	271	341	7	1913	5	3	-6	-9	-4	-30	-2	105	50	-12	-47	0	-50	-20	32	-56	41	18	-16	-105	304	36	126	23	-78	337	-21	-19	-2	-8	32	-1	6	3
141.53	147	2	-399	-296	-278	288	224	34	232	83	-46	282	367	11	1939	1	5	-6	-10	1	-31	2	110	49	-11	-47	-5	-62	-26	31	-76	45	19	-24	-100	306	38	124	28	-62	357	-14	-19	-8	-24	29	-4	-2	-1
229.12	162	41	-560	-452	-259	302	229	35	235	86	-48	300	412	17	1986	-5	6	-6	-11	6	-32	5	121	46	-10	-47	-11	-77	-33	31	-106	58	22	-33	-95	307	40	120	35	-37	394	-3	-18	16	-4	26	-1	-10	-1
357.32	182	27	-738	-577	-231	326	233	34	241	92	-51	325	477	23	2054	-13	6	-6	-12	11	-33	8	134	44	-10	-47	-17	-95	-41	31	-136	74	26	-41	-91	307	43	117	40	-14	426	7	-17	3	0	25	-2	-17	-1
458.62	201	16	-866	-656	-203	351	236	32	240	98	-55	345	532	28	2118	-20	6	-7	-13	13	-34	9	148	43	-10	-47	-20	-107	-45	32	-156	85	29	-47	-89	307	44	115	43	4	455	15	-17	4	1	21	-4	-29	-7
505.66	212	8	-922	-688	-190	366	238	32	241	102	-56	356	560	29	2152	-22	7	-8	-13	15	-34	10	155	42	-9	-47	-22	-113	-47	33	-165	92	31	-50	-88	307	45	114	45	15	469	19	-17	12	1	24	2	-30	-2
546.26	220	-2	-962	-712	-181	378	239	31	241	105	-59	365	583	31	2181	-23	7	-9	-12	15	-34	11	162	42	-11	-47	-24	-118	-49	33	-172	99	33	-52	-88	307	45	113	46	24	486	23	-16	16	1	23	1	-32	-2
566.57	225	-5	-989	-729	-173	387	240	31	243	109	-60	372	602	32	2205	-24	8	-9	-12	16	-34	10	170	41	-11	-47	-25	-123	-50	34	-180	104	35	-54	-87	307	46	112	48	34	500	30	-16	4	3	22	5	-33	-1
607.07	237	-8	-1030	-753	-160	402	241	30	243	114	-63	386	631	34	2244	-26	8	-9	-12	16	-33	11	182	41	-12	-47	-27	-129	-53	34	-189	111	36	-56	-87	306	47	112	50	49	524	39	-16	15	5	23	6	-37	-2
647.57	249	-14	-1076	-780	-144	420	243	29	243	121	-67	403	667	35	2289	-27	9	-11	-12	17	-33	12	199	40	-13	-47	-28	-135	-55	36	-199	124	40	-59	-86	306	47	111	52	65	545	46	-15	14	6	23	4	-38	-1
688.07	261	-21	-1117	-803	-129	438	244	28	241	129	-71	420	699	36	2330	-28	10	-12	-12	17	-33	12	216	40	-15	-47	-29	-142	-57	36	-207	133	42	-61	-85	306	47	110	54	80	565	53	-14	1	6	21	3	-41	0
728.68	275	-29	-1155	-827	-113	458	245	27	240	139	-76	439	737	37	2383	-30	10	-13	-11	17	-32	12	240	39	-14	-46	-31	-149	-60	38	-219	153	48	-63	-85	305	48	111	56	99	596	64	-14	11	6	20	6	-44	-1
796.77	300	-46	-1212	-865	-84	491	247	25	235	157	-85	476	801	38	2471	-30	12	-15	-11	17	-31	12	279	38	-19	-47	-33	-160	-63	40	-235	182	55	-68	-84	305	49	111	59	130	658	80	-12	3	4	17	7	-49	-1
857.47	330	-56	-1266	-902	-53	530	250	24	233	179	-93	522	873	40	2568	-28	14	-16	-11	16	-29	13	323	37	-18	-46	-36	-172	-68	44	-251	218	61	-72	-84	304	50	112	63	165	728	98	-9	4	6	17	5	-54	0
938.57	373	-75	-1331	-949	-4	583	254	21	230	210	-103	584	969	42	2693	-24	17	-18	-10	15	-27	12	377	35	-21	-46	-38	-187	-73	48	-269	259	72	-76	-84	302	51	112	66	212	816	119	-6	12	3	14	8	-56	1
1046.41	431	-102	-1403	-1007	58	651	259	18	227	249	-116	666	1093	44	2844	-18	20	-21	-9	15	-25	13	440	33	-22	-46	-41	-204	-78	55	-289	316	85	-83	-84	301	51	114	69	277	930	149	-1	6	-2	12	8	-64	-2
1147.72	513	-122	-1465	-1068	147	752	265	15	224	310	-130	795	1279	49	3079	-5	26	-23	-9	19	-21	15	534	31	-18	-45	-43	-232	-86	77	-323	413	105	-94	-79	301	54	114	76	399	1131	205	4	5	1	11	8	-72	0
1330.13	648	-168	-1561	-1166	313	906	276	9	220	404	-148	984	1567	57	3429	16	32	-26	-9	22	-16	16	658	28	-17	-45	-46	-274	-98	105	-368	543	134	-111	-75	300	56	112	84	578	1413	291	9	6	-2	11	11	-83	3
1532.79	795	-218	-1656	-1271	520	1068	287	5	217	496	-165	1168	1856	64	3769	35	39	-29	-9	25	-11	17	754	24	-17	-45	-50	-307	-108	126	-404	638	156	-123	-72	300	59	111	90	716	1610	349	12	6	-2	7	13	-98	5
1653.7	888	-255	-1719	-1341	656	1160	293	1	212	549	-174	1266	2011	69	3948	44	41	-30	-8	26	-8	18	793	23	-16	-45	-51	-322	-112	134	-419	677	165	-128	-71	299	60	111	92	771	1678	369	14	5	-4	4	11	-106	4
1681.18	908	-261	-1734	-1356	683	1181	295	2	214	562	-175	1287	2044	69	3987	46	42	-30	-8	26	-8	18	803	23	-17	-45	-51	-326	-113	136	-423	685	167	-129	-71	299	60	111	92	785	1699	374	13	15	-4	5	12	-107	3
1694.2	914	-266	-1742	-1364	692	1189	295	1	214	568	-175	1296	2057	69	4001	46	42	-30	-8	26	-7	18	806	22	-17	-46	-51	-327	-113	137	-424	686	168	-130	-70	298	60	110	93	792	1707	375	14	4	-5	7	12	-107	8
1714.39	929	-271	-1752	-1376	717	1205	296	1	212	577	-177	1315	2088	70	4038	48	42	-31	-8	27	-7	18	814	22	-17	-46	-52	-330	-114	139	-429	694	170	-131	-70	297	60	110	93	808	1729	382	14	5	-5	6	11	-109	6
1701.43	931	-266	-1754	-1377	717	1207	296	0	213	580	-177	1316	2088	70	4038	48	42	-30	-8	27	-7	18	815	22	-17	-46	-52	-330	-114	139	-429	692	171	-131	-70	298	60	110	93	809	1728	381	15	5	-2	5	12	-108	6
1714.39	933	-270	-1757	-1381	721	1211	296	0	213	582	-178	1321	2098	70	4053	48	42	-30	-8	27	-6	19	817	22	-17	-46	-52	-333	-115	140	-432	696	172	-132	-70	297	60	110	94	822	1747	388	15	6	-3	5	14	-110	3
1741.93	950	-278	-1768	-1394	757	1234	298	0	214	596	-179	1359	2162	73	4134	53	44	-31	-8	29	-5	19	836	21	-16	-46	-53	-344	-118	149	-446	730	179	-137	-69	298	61	110	96	881	1841	426	16	14	-5	3	15	-112	6
1849.66	1029	-302	-1802	-1445	898	1317	304	-3	213	637	-187	1458	2324	79	4336	65	47	-33	-8	31	-2	20	881	20	-15	-46	-55	-364	-124	163	-467	787	193	-145	-65	297	63	110	101	970	1979	474	19	17	-3	2	14	-117	6
1971.32	1112	-334	-1849	-1502	1044	1403	310	-7	209	683	-195	1567	2501	85	4560	75	51	-35	-7	32	2	21	926	17	-15	-46	-57	-387	-131	178	-492	848	207	-154	-62	296	65	110	105	1069	2139	522	23	8	-4	3	15	-126	9
2066.2	1179	-360	-1883	-1544	1160	1470	316	-8	207	721	-200	1653	2636	90	4734	84	54	-36	-8	34	5	22	959	16	-14	-46	-58	-404	-135	189	-510	890	219	-160	-60	297	66	109	108	1142	2225	553	21	14	-4	1	15	-132	9
2180.57	1253	-392	-1933	-1598	1292	1549	322	-12	201	768	-206	1754	2794	95	4941	94	57	-39	-7	36	8	22	998	15	-13	-46	-59	-425	-142	204	-535	948	234	-170	-57	296	67	108	111	1234	2365	595	23	1	-5	0	20	-139	8
2289.01	1327	-421	-1976	-1646	1427	1633	329	-13	200	823	-213	1859	2950	103	5136	104	60	-39	-8	39	12	23	1040	13	-12	-46	-60	-441	-145	216	-551	1001	249	-175	-55	297	68	105	113	1298	2440	610	21	3	-6	1	21	-147	9
2302.13	1356	-429	-1996	-1658	1462	1660	332	-11	204	848	-215	1884	2978	104	5179	104	60	-38	-8	38	13	23	1052	13	-13	-47	-60	-442	-145	217	-552	1011	253	-175	-55	297	68	104	113	1304	2452	608	22	5	-7	-2	21	-147	11
2289.01	1360	-428	-2000	-1659	1461	1666	333	-9	206	856	-216	1887	2982	104	5182	104	60	-38	-8	38	13	23	1056	14	-13	-46	-59	-442	-145	217	-552	1012	257	-175	-54	297	68	104	113	1304	2455	605	21	3	-6	0	17	-148	11
2281.93	1362	-432	-2003	-1659	1459	1671	334	-7	208	861	-216	1890	2993	104	5194	104	60	-36	-8	38	13	23	1058	14	-13	-47	-59	-441	-144	217	-552	1013	258	-174	-55	297	69	103	114	1303	2454	603	21	6	-7	2	18	-146	10
2255.09	1367	-427	-2011	-1661	1448	1676	336	-4	207	872	-216	1892	3022	104	5214	104	60	-35	-8	38	13	23	1063	14	-14	-47	-58	-441	-144	214	-552	1013	261	-174	-56	296	68	103	114	1301	2457	600	22	3	-5	-1	20	-147	13
2295.65	1418	-411	-2020	-1666	1466	1695	493	10	211	902	-214	1918	3069	108	5328	100	62	-34	-8	38	14	23	1071	13	-14	-47	-58	-443	-145	216	-556	1020	267	-175	-55	295	69	102	114	1311	2475	603	23	5	-6	0	19	-150	13
2289.01	1405	-423	-2024	-1667	1463	1695	446	5	214	900	-214	1919	3074	108	5350	99	62	-34	-7	38	14	23	1072	14	-14	-47	-58	-443	-144	218	-555	1022	268	-175	-55	294	69	102	114	1310	2475	602	22	5	-6	-2	21	-146	12
2275.34	1445	-399	-2030	-1666	1461	1696	303	4	215	900	-214	1919	3078	108	5372	99	62	-34	-8	39	14	23	1073	14	-14	-47	-58	-443	-144	218	-555	1023	269	-175	-54	294	69	102	115	1309	2475	601	23	2	-4	1	19	-146	13
2268.81	1439	-430	-2033	-1668	1458	1697	300	4	216	901	-215	1919	3081	108	5390	99	61	-34	-8	38	14	24	1073	14	-14	-47	-58	-443	-144	217	-555	1020	270	-175	-55	293	69	102	114	1307	2474	600	22	7	-7	0	18	-149	14
2261.57	1437	-430	-2034	-1668	1456	1697	290	4	217	901	-215	1919	3084	108	5404	99	61	-33	-8	38	14	24	1073	14	-14	-47	-57	-443	-143	218	-554	1022	271	-174	-55	293	68	102	114	1307	2470	599	21	3	-7	1	16	-144	14
2302.18	1439	-431	-2039	-1673	1459	1701	279	-10	222	898	-217	1924	3096	109	5426	105	62	-34	-7	38	14	23	1075	14	-15	-47	-58	-444	-144	218	-557	1022	272	-175	-55	293	68	101	114	1310	2479	602	21	5	-5	0	18	-148	14
2315.84	1451	-435	-2061	-1690	1471	1724	255	-7	215	930	-217	1949	3177	110	5613	100	62	-32	-8	38	15	23	1088	13	-16	-48	-57	-447	-145	218	-561	1028	280	-177	-56	290	68	105	115	1319	2502	646	34	2	-3	0	18	-147	13
2309.31	1452	-441	-2062	-1691	1470	1725	254	-7	219	931	-218	1949	3187	110	5623	100	62	-32	-8	38	15	23	1088	13	-16	-48	-57	-447	-144	219	-561	1028	283	-177	-56	290	68	104	114	1319	2501	605	35	6	-3	-1	19	-147	16
2302.18	1452	-439	-2062	-1691	1469	1725	252	-7	219	932	-217	1949	3315	110	5639	100	62	-32	-8	38	15	23	1089	13	-15	-48	-57	-447	-144	218	-561	1030	284	-176	-57	290	69	104	114	1318	2506	598	35	4	-2	0	19	-147	14
2281.82	1451	-437	-2066	-1692	1463	1727	257	-6	199	933	-218	1949	3457	110	5675	100	61	-31	-8	38	15	23	1091	13	-16	-48	-57	-447	-144	218	-560	1027	284	-176	-56	289	68	104	114	1314	2503	635	34	5	-2	1	17	-146	16
2255.04	1451	-435	-2067	-1693	1458	1728	255	-5	209	936	-218	1949	3540	110	5706	100	61	-31	-8	38	15	23	1093	13	-16	-49	-56	-445	-143	217	-560	1029	285	-176	-56	363	68	103	115	1311	2494	610	31	3	0	1	16	-145	15
2255.09	1450	-443	-2068	-1693	1458	1728	257	-5	205	936	-219	1949	3548	111	5709	100	61	-31	-8	37	15	23	1092	13	-16	-49	-57	-445	-144	219	-559	1028	284	-176	-57	360	68	103	114	1310	2503	609	34	16	-2	1	16	-148	17
2248.51	1449	-444	-2068	-1693	1456	1728	261	-5	210	935	-219	1949	3556	110	5704	100	61	-30	-8	37	15	22	1093	13	-16	-48	-57	-445	-143	218	-558	1028	285	-176	-58	359	68	102	114	1308	2494	607	33	4	-3	0	19	-144	16
2126.9	1446	-439	-2066	-1689	1449	1725	260	-5	212	935	-218	1944	3553	110	5693	99	60	-31	-8	37	15	22	1091	13	-16	-49	-56	-443	-143	218	-555	1025	285	-175	-58	358	68	102	113	1298	2482	598	30	6	-3	0	16	-143	12
2032.02	1426	-422	-2044	-1660	1395	1699	259	-3	216	928	-215	1912	3476	107	5599	97	59	-29	-9	38	15	23	1083	14	-14	-49	-53	-427	-137	212	-536	1006	276	-168	-58	358	67	103	112	1251	2404	555	29	14	-3	1	17	-141	15
1910.47	1387	-393	-2008	-1615	1309	1654	266	-1	216	914	-212	1856	3361	104	5460	92	58	-27	-10	39	13	23	1069	16	-12	-49	-50	-407	-130	202	-515	975	265	-160	-59	360	65	103	108	1186	2291	506	29	20	0	0	13	-134	13
1768.66	1321	-359	-1963	-1554	1181	1588	261	1	218	889	-206	1777	3208	101	5280	83	55	-24	-11	42	10	24	1048	18	-9	-50	-46	-385	-123	188	-487	926	250	-151	-59	361	63	103	103	1085	2136	430	27	6	2	0	13	-127	14
1525.34	1206	-304	-1886	-1445	949	1454	253	5	222	836	-192	1610	2906	96	4916	62	51	-20	-14	47	3	26	995	22	-2	-51	-39	-341	-109	161	-437	817	215	-135	-59	364	60	104	96	888	1828	297	20	5	4	5	11	-113	9
1194.59	1015	-233	-1763	-1271	598	1216	237	9	231	725	-165	1341	2452	88	4369	33	47	-14	-18	48	-9	27	873	28	0	-53	-32	-279	-91	119	-373	632	167	-112	-62	366	58	107	86	629	1414	150	10	17	10	5	10	-95	4
863.84	765	-144	-1625	-1082	236	882	213	13	241	546	-131	994	1920	66	3730	1	33	-9	-17	33	-22	21	591	35	-6	-53	-27	-205	-71	73	-286	385	111	-81	-75	363	51	114	69	363	964	105	-1	17	13	8	4	-69	-2
512.68	476	-40	-1357	-818	-91	563	186	17	246	319	-89	652	1416	45	3142	-16	17	-4	-15	21	-30	14	334	40	-8	-53	-20	-145	-54	50	-209	200	70	-59	-85	361	46	118	54	165	695	64	-8	12	9	15	-1	-40	-2
397.55	377	5	-1174	-690	-196	457	173	16	248	232	-73	529	1226	36	2919	-15	13	-3	-13	16	-31	11	245	43	-9	-52	-16	-119	-45	41	-169	136	53	-47	-90	360	43	121	47	73	589	46	-10	6	8	17	-1	-29	-1
289.76	311	31	-1002	-583	-259	390	163	15	246	177	-63	446	1092	26	2766	-12	9	-2	-12	10	-31	8	189	45	-9	-52	-11	-97	-38	36	-135	103	41	-37	-95	359	41	123	40	11	507	34	-13	7	6	22	-4	-17	-1
118.21	238	42	-697	-401	-326	323	151	13	248	122	-50	347	931	14	2584	-4	5	-2	-10	1	-32	2	131	48	-12	-51	-3	-66	-27	31	-81	48	28	-23	-105	357	36	127	29	-66	413	5	-14	1	-1	28	-7	-6	1
-0.59	195	44	-432	-235	-354	292	147	11	243	93	-44	299	852	7	2493	0	2	-2	-9	-3	-32	-3	112	50	-13	-50	1	-52	-20	30	-56	32	25	-16	-110	357	35	129	30	-95	369	17	-13	7	-1	31	-9	2	1
-0.59	187	38	-366	-205	-355	287	144	11	243	86	-43	288	835	6	2472	2	2	-3	-9	-5	-32	-3	109	50	-13	-49	1	-49	-18	30	-51	32	22	-14	-109	356	35	130	30	-103	362	12	-14	7	-4	31	-8	7	1
-0.59	183	38	-337	-193	-354	284	142	11	243	83	-43	284	827	5	2463	2	2	-3	-8	-5	-31	-3	108	50	-13	-49	2	-47	-18	30	-48	33	22	-14	-111	356	34	130	29	-106	353	11	-14	17	-5	34	-9	4	2
-0.49	180	35	-314	-185	-352	282	141	10	241	80	-43	280	821	4	2456	3	2	-3	-9	-5	-32	-3	107	51	-13	-49	2	-46	-17	30	-45	32	20	-13	-111	355	35	130	29	-109	353	10	-15	7	-8	33	-9	7	2
-0.54	179	39	-301	-182	-350	282	141	10	241	79	-42	279	817	4	2452	3	2	-3	-8	-5	-31	-4	107	51	-13	-48	3	-46	-17	30	-44	33	20	-12	-111	354	34	130	28	-112	348	9	-15	19	-6	32	-7	7	0
-0.54	176	37	-286	-178	-350	280	140	9	244	76	-42	275	812	3	2446	3	2	-3	-8	-6	-31	-4	106	51	-14	-48	3	-44	-17	30	-42	33	20	-12	-112	354	34	129	28	-115	342	9	-16	8	-8	32	-9	7	2
-0.49	175	39	-275	-174	-348	280	139	10	246	75	-40	274	809	3	2443	4	2	-4	-8	-6	-31	-4	106	51	-14	-48	3	-44	-16	30	-41	35	20	-11	-112	354	34	129	28	-115	338	8	-16	16	-6	33	-8	8	1
12.58	174	37	-268	-172	-346	278	138	9	246	74	-42	273	808	3	2441	3	2	-3	-8	-6	-32	-4	106	51	-13	-48	3	-44	-16	31	-41	37	19	-12	-111	353	34	130	27	-116	345	8	-16	21	-8	34	-8	9	3
12.64	173	37	-265	-171	-343	278	137	9	247	73	-42	273	807	3	2440	3	2	-3	-8	-6	-32	-4	106	51	-13	-47	3	-44	-16	31	-41	39	19	-12	-112	353	34	129	27	-117	341	9	-15	7	-7	33	-5	9	0
40.12	173	36	-268	-175	-339	278	137	9	252	72	-42	273	808	3	2440	3	2	-4	-8	-6	-32	-3	107	51	-13	-47	3	-44	-17	31	-43	42	19	-12	-112	352	34	129	28	-116	335	10	-14	9	-6	33	-8	8	3
46.66	174	31	-273	-177	-337	278	137	9	252	72	-42	274	809	4	2441	3	2	-4	-8	-6	-31	-3	107	51	-13	-47	3	-45	-17	30	-44	42	19	-12	-112	352	35	129	27	-115	338	9	-16	14	-9	34	-10	7	2
66.91	175	34	-285	-181	-333	279	137	9	252	71	-42	276	813	5	2444	3	2	-3	-8	-5	-31	-3	108	50	-13	-47	2	-47	-18	30	-46	45	19	-13	-111	352	34	128	28	-113	337	10	-14	17	-6	32	-9	6	-2
87.21	178	29	-321	-209	-327	281	138	9	253	72	-42	281	824	7	2455	1	3	-3	-8	-3	-32	-2	111	50	-12	-47	0	-52	-20	30	-55	49	22	-17	-110	352	36	127	32	-105	359	12	-14	9	-8	32	-5	4	1
141.53	185	31	-412	-310	-318	289	139	9	253	73	-43	292	850	11	2482	-3	4	-3	-10	1	-32	2	117	48	-11	-46	-4	-63	-26	29	-76	56	25	-23	-105	353	37	125	37	-90	379	20	-12	16	-4	34	-7	0	-6
249.43	203	37	-607	-488	-295	306	143	9	253	78	-45	314	905	17	2540	-12	5	-3	-11	7	-34	5	128	46	-10	-46	-11	-81	-35	29	-109	73	26	-34	-99	354	40	121	44	-65	412	33	-12	13	0	28	-1	-10	0
397.87	232	25	-817	-624	-261	337	149	8	250	86	-49	343	979	23	2620	-21	6	-4	-12	11	-36	8	144	43	-11	-47	-17	-98	-42	29	-139	87	31	-41	-95	354	42	118	49	-40	447	44	-12	5	4	24	0	-20	0
444.91	241	21	-871	-655	-250	348	151	8	250	91	-51	353	1004	25	2647	-23	6	-4	-12	12	-36	8	150	43	-11	-47	-19	-104	-44	29	-149	94	32	-44	-93	354	43	116	52	-29	464	49	-11	17	7	25	0	-24	0
508.9	255	11	-951	-705	-230	371	152	7	251	98	-55	373	1055	30	2713	-27	7	-5	-12	15	-36	10	167	41	-12	-47	-22	-118	-49	31	-170	106	34	-51	-91	353	44	114	55	-6	502	60	-12	18	7	22	2	-28	0
600.48	277	-5	-1056	-765	-199	407	154	5	250	112	-63	407	1125	32	2803	-33	9	-8	-12	16	-36	10	196	39	-13	-47	-27	-133	-54	33	-194	131	45	-58	-89	352	46	112	60	30	553	80	-10	5	8	23	1	-36	0
722.14	318	-25	-1182	-838	-147	466	159	2	245	142	-77	467	1233	36	2947	-37	11	-10	-11	16	-34	11	259	38	-16	-46	-30	-152	-61	36	-223	170	56	-65	-89	351	47	111	66	77	640	104	-7	5	10	20	6	-42	0
817.02	361	-50	-1270	-891	-104	517	163	0	242	174	-89	524	1325	39	3077	-37	14	-12	-11	15	-32	12	311	37	-18	-46	-33	-165	-65	39	-241	205	66	-69	-88	350	48	111	69	115	692	122	-3	7	7	18	6	-48	2
899.1	402	-73	-1341	-941	-58	571	167	-1	244	212	-101	593	1432	41	3215	-35	17	-15	-10	14	-30	12	377	35	-20	-46	-36	-183	-71	45	-265	260	81	-76	-88	349	49	112	74	173	813	150	2	18	6	15	4	-52	1
1012.34	471	-89	-1421	-1003	15	652	175	-3	242	267	-114	694	1580	45	3397	-28	21	-17	-10	15	-28	12	459	33	-20	-46	-39	-205	-77	56	-290	336	98	-83	-86	348	51	112	79	257	954	187	6	15	7	14	5	-59	4
1147.77	579	-122	-1505	-1077	120	772	183	-6	242	348	-130	838	1784	50	3637	-15	26	-20	-10	19	-24	13	552	30	-19	-45	-41	-231	-85	75	-321	423	119	-93	-83	347	52	110	84	369	1135	233	10	8	6	12	8	-69	3
1309.88	707	-166	-1595	-1168	277	920	194	-8	235	449	-149	1027	2063	57	3966	3	32	-22	-10	22	-19	15	681	27	-18	-46	-44	-271	-97	102	-365	555	150	-109	-78	346	54	107	93	544	1408	311	14	8	4	7	10	-80	7
1505.25	854	-213	-1687	-1271	487	1083	205	-11	233	548	-168	1223	2354	65	4295	23	38	-24	-9	25	-13	17	785	23	-17	-46	-46	-305	-106	124	-402	666	175	-122	-76	345	57	104	98	696	1633	375	17	15	4	7	11	-91	5
1633.39	957	-251	-1753	-1342	637	1187	212	-13	231	611	-177	1335	2526	70	4483	33	41	-25	-9	26	-10	17	834	22	-17	-46	-48	-321	-110	132	-417	704	188	-128	-75	345	57	103	101	750	1704	392	19	6	2	4	11	-101	7
1673.95	983	-260	-1775	-1365	675	1215	214	-13	231	630	-180	1366	2575	70	4536	35	41	-26	-9	26	-9	17	846	21	-18	-46	-48	-326	-112	135	-424	714	192	-129	-75	344	58	102	100	774	1736	401	18	20	4	6	12	-102	12
1694.2	1002	-268	-1789	-1381	706	1238	215	-13	230	644	-183	1390	2612	71	4580	37	42	-26	-9	26	-8	17	857	21	-18	-46	-49	-330	-113	138	-427	725	194	-130	-75	343	58	102	101	791	1757	406	17	6	1	6	12	-103	11
1701.49	1009	-270	-1795	-1385	712	1244	215	-13	231	649	-183	1394	2618	71	4584	37	42	-26	-9	26	-8	17	859	21	-18	-46	-49	-330	-113	138	-429	722	196	-131	-75	343	58	102	101	793	1756	405	18	8	2	4	9	-102	10
1694.2	1009	-269	-1797	-1386	709	1245	215	-14	229	652	-183	1394	2618	71	4583	37	42	-26	-9	26	-8	17	859	21	-18	-46	-49	-330	-113	137	-428	721	194	-130	-75	343	58	102	101	794	1757	404	17	16	3	4	12	-102	10
1681.13	1008	-279	-1798	-1388	707	1245	215	-13	231	653	-183	1394	2617	71	4582	37	42	-26	-9	26	-8	17	859	21	-18	-47	-49	-331	-113	136	-429	720	195	-130	-75	343	58	102	102	794	1758	402	16	7	-2	5	11	-103	10
1673.95	1009	-272	-1799	-1387	706	1246	215	-13	230	654	-183	1394	2617	71	4581	37	42	-25	-8	26	-8	17	859	21	-18	-47	-48	-330	-113	137	-429	719	195	-130	-76	342	58	102	101	793	1754	402	16	17	0	5	13	-104	9
1701.43	1011	-276	-1804	-1394	714	1252	215	-14	231	657	-185	1406	2640	71	4609	38	42	-26	-9	26	-8	17	865	21	-17	-47	-48	-338	-114	144	-437	743	199	-134	-73	345	59	101	103	831	1818	423	16	6	2	6	10	-106	10
1762.18	1058	-289	-1819	-1418	799	1301	219	-14	229	682	-188	1465	2732	77	4716	44	45	-27	-9	29	-5	19	889	20	-17	-47	-49	-346	-117	150	-447	763	206	-137	-72	344	60	101	105	869	1873	443	16	7	1	6	11	-111	9
1815.8	1092	-304	-1839	-1444	856	1338	221	-15	226	705	-192	1511	2804	79	4799	48	46	-28	-9	29	-4	19	910	19	-17	-47	-50	-355	-120	155	-456	788	213	-140	-72	343	60	100	106	907	1931	461	16	9	-1	5	14	-112	11
1869.97	1130	-315	-1860	-1471	923	1380	224	-16	227	728	-196	1561	2887	81	4895	54	47	-28	-9	29	-2	19	934	18	-17	-47	-52	-365	-123	161	-467	816	222	-144	-71	342	60	99	108	951	1994	482	17	8	2	3	12	-115	10
1903.99	1153	-330	-1873	-1487	964	1405	227	-17	226	743	-198	1594	2940	83	4959	57	48	-28	-8	30	-1	19	949	18	-16	-47	-52	-373	-125	167	-475	837	228	-147	-69	342	62	99	110	990	2057	504	17	15	0	2	13	-118	10
1964.74	1200	-341	-1895	-1515	1041	1453	230	-17	231	771	-202	1653	3035	87	5070	63	50	-29	-9	31	1	20	973	17	-16	-47	-53	-384	-128	175	-486	870	236	-152	-67	341	63	98	112	1039	2133	526	18	18	1	2	13	-121	13
2018.41	1241	-358	-1917	-1540	1110	1496	233	-18	230	796	-206	1707	3119	90	5170	68	52	-29	-8	32	3	20	995	16	-15	-47	-53	-394	-131	182	-498	899	242	-155	-65	341	63	97	115	1084	2201	550	18	7	0	1	13	-126	13
2066.2	1278	-372	-1938	-1563	1171	1535	236	-19	232	818	-209	1754	3196	92	5259	73	53	-30	-8	33	5	21	1014	15	-15	-47	-54	-403	-133	188	-508	924	250	-158	-65	341	64	97	116	1124	2258	570	19	18	-2	1	14	-129	12
2119.82	1308	-388	-1958	-1586	1229	1571	239	-19	231	841	-211	1796	3267	95	5342	77	54	-31	-8	34	6	21	1031	14	-15	-47	-55	-411	-136	193	-519	946	257	-164	-64	340	65	96	117	1163	2311	587	19	6	-2	2	13	-132	13
2160.27	1337	-399	-1976	-1604	1282	1603	242	-19	233	859	-214	1835	3331	97	5418	81	57	-31	-8	35	7	21	1046	14	-14	-47	-56	-420	-138	199	-528	967	263	-167	-63	340	65	95	117	1198	2358	602	19	13	-2	1	14	-135	13
2208.06	1368	-413	-1997	-1625	1341	1638	244	-20	234	881	-216	1878	3402	101	5502	85	58	-32	-9	36	9	21	1063	13	-15	-48	-56	-429	-141	206	-538	992	271	-170	-62	340	66	94	118	1237	2408	621	21	18	-2	0	14	-140	13
2248.56	1399	-420	-2015	-1644	1394	1672	246	-20	233	905	-218	1920	3470	104	5579	88	59	-32	-9	37	10	22	1079	12	-14	-48	-57	-437	-143	211	-547	1014	278	-174	-61	340	65	94	119	1272	2459	635	22	18	-3	1	17	-142	15
2295.59	1429	-434	-2040	-1666	1456	1709	249	-19	238	929	-221	1963	3543	107	5663	92	60	-32	-9	38	12	22	1097	12	-14	-48	-57	-445	-145	215	-554	1035	285	-176	-60	340	66	93	120	1298	2487	644	24	2	-3	-1	17	-144	13
2302.18	1441	-443	-2047	-1670	1470	1720	250	-18	235	940	-222	1973	3562	107	5680	92	60	-32	-9	38	12	22	1102	12	-14	-48	-57	-445	-144	215	-555	1037	287	-175	-60	341	66	92	120	1301	2494	640	24	13	-5	0	19	-145	15
2295.59	1443	-443	-2050	-1669	1469	1723	251	-17	233	945	-222	1975	3565	107	5683	92	60	-31	-9	38	12	22	1105	12	-15	-48	-57	-444	-145	215	-554	1037	288	-176	-60	341	66	92	120	1300	2497	639	23	6	-4	-1	15	-143	15
2289.01	1444	-439	-2052	-1669	1469	1725	251	-17	231	948	-223	1975	3569	107	5685	92	60	-31	-9	38	12	22	1106	12	-15	-48	-57	-444	-144	215	-554	1038	290	-176	-58	341	66	92	122	1300	2499	637	23	17	-2	1	16	-143	16
2281.88	1445	-444	-2054	-1669	1467	1726	251	-16	234	950	-223	1975	3571	107	5686	92	60	-31	-9	38	12	22	1107	12	-15	-48	-57	-444	-144	214	-555	1040	291	-176	-59	341	66	92	121	1300	2492	637	21	6	-6	1	15	-146	13
2275.34	1445	-439	-2055	-1669	1466	1727	252	-15	232	952	-223	1976	3572	108	5686	91	60	-30	-9	38	12	22	1108	12	-15	-48	-57	-443	-144	214	-554	1038	291	-175	-59	341	67	92	120	1299	2497	636	21	13	-2	-2	17	-140	13
2281.88	1446	-441	-2057	-1670	1464	1728	252	-14	232	954	-223	1976	3576	107	5688	91	60	-30	-9	37	13	22	1109	12	-15	-48	-57	-444	-144	214	-555	1042	292	-176	-59	340	67	91	121	1301	2489	637	21	4	-3	2	16	-142	15
2302.13	1449	-447	-2062	-1674	1470	1732	252	-15	232	957	-224	1982	3587	108	5700	91	60	-30	-9	37	13	22	1110	12	-15	-48	-57	-445	-145	214	-557	1041	292	-176	-60	340	66	91	121	1305	2496	639	20	7	-3	0	16	-143	16
2309.36	1453	-444	-2066	-1678	1477	1737	253	-14	231	962	-224	1988	3599	109	5712	92	61	-30	-9	38	13	22	1112	12	-15	-48	-57	-447	-145	215	-559	1043	295	-177	-60	340	66	91	120	1311	2509	643	21	14	-2	0	16	-143	16
2322.43	1461	-447	-2071	-1683	1488	1746	254	-14	233	967	-225	1999	3621	109	5731	93	60	-30	-9	38	13	22	1115	12	-15	-48	-58	-449	-146	216	-561	1049	297	-177	-59	340	67	91	121	1319	2525	646	22	9	-2	0	15	-145	19
2328.86	1466	-450	-2076	-1688	1499	1754	254	-14	234	972	-225	2008	3652	110	5750	93	60	-31	-9	38	13	22	1120	12	-15	-48	-57	-451	-146	218	-563	1052	299	-179	-60	338	67	90	120	1326	2529	650	20	7	0	-2	17	-145	16
2342.63	1475	-454	-2081	-1694	1512	1764	256	-13	235	979	-226	2020	3730	111	5774	94	61	-30	-9	38	14	22	1125	12	-15	-48	-58	-453	-147	219	-566	1058	303	-180	-59	340	67	90	121	1336	2555	654	21	8	-2	0	16	-146	16
2349.16	1480	-458	-2086	-1699	1524	1773	257	-13	235	986	-227	2031	3917	112	5801	95	61	-30	-9	39	14	22	1130	11	-15	-48	-58	-455	-148	220	-568	1066	306	-181	-59	341	67	90	111	1346	2564	658	18	16	-2	1	16	-145	17
2369.47	1491	-461	-2095	-1707	1540	1787	259	-13	237	996	-229	2047	+*******	114	5843	96	61	-30	-9	39	15	22	1137	11	-15	-49	-58	-458	-148	222	-571	1075	311	-182	-59	342	67	91	111	1356	2583	663	19	7	0	0	17	-143	16
2369.47	1500	-466	-2100	-1711	1552	1800	259	-11	232	1006	-232	2059	+*******	116	5957	97	61	-30	-9	39	15	22	1144	11	-15	-49	-58	-458	-148	222	-572	1081	314	-182	-58	344	67	90	112	1361	2592	663	20	7	-2	-1	17	-148	18
2369.47	1559	-438	-2108	-1715	1559	1826	501	-8	238	1032	-240	2077	+*******	123	6201	98	61	-27	-9	39	16	23	1160	11	-16	-49	-57	-458	-148	220	-574	1088	325	-181	-58	343	67	116	112	1364	2589	654	40	8	5	-2	19	-143	16
2369.41	1500	-442	-2111	-1719	1560	1829	484	-8	244	1035	-241	2081	+*******	124	6229	97	61	-26	-9	38	16	22	1162	11	-16	-49	-57	-459	-148	221	-575	1091	326	-182	-60	343	67	115	112	1366	2594	655	39	6	6	1	14	-143	19
2376.65	1540	-435	-2119	-1722	1564	1842	428	-9	241	1040	-242	2086	+*******	126	6268	98	61	-25	-9	39	16	22	1165	11	-16	-49	-58	-459	-148	221	-576	1091	328	-182	-59	343	67	114	112	1369	2596	656	37	9	5	0	16	-145	19
2369.41	1532	-443	-2119	-1723	1562	1843	340	-10	240	1045	-243	2088	+*******	128	6311	98	61	-25	-8	39	17	23	1166	11	-16	-48	-57	-459	-148	221	-575	1091	330	-182	-59	343	68	114	113	1369	2596	655	39	9	6	0	17	-143	21
2356.34	1527	-445	-2122	-1724	1556	1846	307	-12	241	1052	-243	2089	+*******	130	6352	98	61	-25	-9	39	17	22	1168	11	-16	-49	-57	-459	-148	219	-575	1093	331	-181	-58	342	68	113	113	1368	2599	654	40	5	9	0	15	-146	20
2349.16	1527	-454	-2123	-1724	1554	1847	304	-12	240	1055	-244	2089	+*******	131	6368	98	61	-25	-9	39	17	22	1169	12	-16	-49	-57	-458	-147	221	-575	1093	332	-181	-59	342	68	113	112	1366	2597	653	40	9	6	0	15	-144	18
2349.16	1521	-451	-2134	-1730	1524	1856	288	-14	253	1076	-247	2094	+*******	137	6476	97	60	-23	-9	38	17	22	1173	11	-16	-49	-57	-457	-147	217	-575	1089	337	-181	-59	340	68	110	113	1359	2584	649	40	3	12	-1	14	-141	18
2369.47	1524	-458	-2140	-1736	1528	1861	287	-15	256	1081	-249	2100	+*******	139	6510	97	60	-23	-9	38	17	22	1175	11	-17	-49	-57	-459	-148	217	-577	1093	339	-181	-58	340	67	110	113	1364	2600	652	38	4	13	1	15	-142	21
2362.88	1526	-458	-2140	-1735	1527	1862	290	-15	255	1082	-248	2101	+*******	140	6516	97	60	-23	-9	38	17	22	1175	11	-16	-49	-57	-459	-148	218	-577	1095	341	-182	-58	340	68	109	113	1364	2596	652	37	18	14	2	11	-139	18
2362.88	1526	-459	-2141	-1736	1526	1862	288	-14	258	1083	-249	2101	+*******	141	6520	97	60	-22	-9	39	17	22	1176	11	-17	-49	-57	-458	-148	219	-576	1093	341	-181	-59	340	68	109	113	1363	2596	651	35	8	13	0	16	-142	21
2246.83	1526	-456	-2140	-1735	1522	1861	288	-14	256	1083	-249	2099	+*******	141	6519	97	60	-22	-9	38	17	22	1175	11	-17	-49	-57	-457	-147	219	-575	1091	340	-181	-59	340	68	109	113	1360	2592	649	35	19	14	0	15	-141	18
2194.18	1523	-453	-2139	-1732	1517	1860	287	-14	258	1083	-248	2096	+*******	141	6516	97	60	-22	-9	38	17	22	1175	11	-17	-50	-57	-457	-147	218	-574	1089	340	-181	-59	340	67	109	113	1357	2586	646	36	22	14	1	15	-143	19
2139.97	1518	-451	-2134	-1724	1501	1852	286	-14	257	1081	-248	2086	+*******	139	6490	97	59	-22	-9	38	17	22	1171	11	-16	-50	-56	-451	-145	216	-567	1083	338	-177	-60	341	67	109	111	1341	2561	632	36	7	13	-2	14	-140	19
2099.41	1504	-437	-2118	-1704	1468	1836	285	-13	262	1076	-246	2065	+*******	138	6442	96	59	-20	-9	39	16	22	1167	12	-15	-49	-54	-444	-142	213	-558	1074	333	-174	-61	341	67	110	111	1318	2531	614	38	16	15	1	13	-137	15
2038.61	1484	-426	-2100	-1681	1423	1812	283	-12	257	1067	-244	2039	+*******	136	6379	94	58	-20	-10	39	16	23	1161	13	-14	-50	-53	-436	-139	210	-548	1063	327	-171	-60	342	66	109	110	1291	2485	593	36	8	16	0	10	-131	18
1977.8	1463	-410	-2080	-1656	1374	1787	282	-11	260	1058	-242	2009	+*******	134	6311	91	57	-18	-11	39	15	23	1153	13	-13	-50	-51	-426	-136	206	-537	1046	322	-167	-61	343	66	110	108	1259	2434	568	36	9	15	2	10	-129	15
1916.95	1438	-395	-2059	-1629	1320	1756	280	-10	263	1046	-239	1974	+*******	133	6233	88	55	-17	-10	41	14	23	1145	15	-12	-50	-49	-415	-132	199	-526	1029	317	-163	-62	343	65	111	107	1222	2388	540	36	15	16	-2	11	-126	18
1843.13	1400	-377	-2035	-1592	1240	1711	277	-9	265	1026	-235	1913	+*******	130	6099	80	54	-15	-12	42	11	24	1128	16	-9	-51	-46	-397	-127	188	-504	989	299	-156	-61	344	63	112	104	1134	2239	470	35	8	18	1	6	-122	15
1336.45	1143	-265	-1872	-1360	735	1401	260	-1	279	869	-199	1534	+*******	115	5348	39	47	-8	-19	51	-7	28	985	24	1	-54	-34	-305	-98	126	-405	735	218	-122	-61	352	59	117	91	730	1617	232	22	8	25	5	5	-98	8
1032.43	887	-180	-1738	-1172	353	1080	244	4	286	699	-167	1230	+*******	93	4827	12	38	-5	-18	41	-17	24	824	29	-3	-54	-32	-257	-86	92	-354	586	181	-103	-68	352	56	123	82	541	1322	168	17	19	26	6	0	-77	4
870.37	742	-131	-1649	-1064	163	902	232	6	287	579	-146	1042	+*******	79	4505	-2	31	-3	-18	34	-24	21	660	32	-6	-54	-29	-217	-76	69	-308	447	145	-87	-76	349	52	128	72	382	1072	127	13	5	26	7	1	-63	2
707.08	603	-81	-1541	-948	2	740	219	9	292	453	-124	855	+*******	66	4184	-12	24	-1	-16	28	-29	17	499	36	-7	-53	-26	-182	-65	54	-262	319	112	-73	-83	349	48	132	63	255	861	98	6	19	26	11	-1	-51	1
525.69	466	-23	-1382	-812	-153	578	203	11	297	311	-97	658	+*******	50	3838	-18	15	1	-15	20	-32	13	330	40	-9	-53	-20	-140	-53	40	-202	185	77	-56	-90	348	44	137	51	111	643	64	-1	8	26	14	-3	-35	0
336.8	340	22	-1141	-655	-283	441	187	15	300	195	-74	494	+*******	36	3548	-15	8	2	-14	11	-35	8	215	44	-10	-53	-13	-104	-42	31	-147	99	54	-40	-96	346	40	141	40	4	506	39	-4	12	20	22	-4	-21	-1
222.37	273	50	-929	-538	-348	376	178	15	298	142	-62	412	+*******	26	3403	-10	5	3	-12	6	-34	5	167	45	-11	-52	-8	-83	-34	28	-114	66	42	-31	-101	345	38	144	33	-49	442	26	-6	17	17	25	-6	-11	0
86.99	220	53	-678	-395	-392	329	169	14	295	105	-52	343	+*******	16	3284	-3	2	2	-10	0	-33	1	133	48	-13	-52	-3	-64	-27	26	-78	38	34	-21	-107	344	36	147	27	-96	387	12	-7	5	11	28	-6	-2	1
-0.65	189	45	-477	-279	-412	305	164	13	295	85	-46	307	+*******	11	3220	1	1	1	-9	-3	-33	-3	119	49	-13	-51	0	-54	-23	26	-60	27	29	-16	-111	343	34	148	22	-116	358	7	-7	9	7	31	-8	3	2
-0.59	179	47	-393	-238	-413	298	162	12	297	77	-45	294	+*******	9	3198	3	0	1	-9	-4	-32	-3	114	50	-14	-50	1	-51	-21	25	-53	24	28	-14	-112	344	34	148	21	-124	361	6	-9	15	7	31	-7	4	2
-0.54	175	43	-355	-225	-411	295	160	13	299	74	-43	288	+*******	8	3188	3	0	1	-9	-5	-33	-4	113	50	-14	-50	2	-49	-20	26	-50	26	28	-13	-113	343	34	149	21	-129	353	6	-9	9	3	28	-8	5	3
-0.54	171	43	-331	-218	-409	293	159	12	300	72	-44	284	+*******	7	3181	4	0	0	-9	-5	-33	-4	112	50	-13	-49	2	-48	-19	26	-48	27	27	-13	-114	343	34	149	20	-131	351	5	-9	10	4	30	-6	6	2
-0.49	170	41	-317	-214	-407	292	158	12	300	70	-43	283	+*******	7	3177	4	0	0	-8	-5	-32	-4	111	50	-14	-49	2	-47	-19	26	-47	30	25	-12	-113	343	34	148	19	-133	351	5	-10	16	3	31	-9	9	2
-0.49	167	41	-304	-210	-404	291	158	12	300	69	-43	281	+*******	7	3173	4	0	0	-9	-6	-32	-4	111	50	-13	-49	2	-46	-19	26	-46	28	26	-12	-113	343	33	149	20	-135	347	5	-10	17	2	33	-8	7	2
19.71	167	45	-296	-208	-402	290	157	11	299	67	-43	280	+*******	6	3171	4	0	0	-8	-5	-32	-4	111	50	-14	-48	2	-46	-18	26	-46	33	25	-12	-113	343	33	148	20	-135	349	7	-11	18	3	31	-8	8	1
40.07	165	44	-298	-211	-397	289	156	11	298	66	-43	280	+*******	6	3171	4	0	0	-9	-5	-33	-4	112	50	-13	-48	1	-47	-19	26	-47	35	25	-12	-113	343	34	148	20	-135	349	8	-11	5	3	32	-9	7	3
53.19	166	41	-302	-212	-394	291	156	12	301	67	-43	281	+*******	7	3172	4	1	0	-8	-5	-33	-4	113	50	-14	-48	2	-48	-19	26	-48	35	26	-13	-113	342	34	148	20	-134	353	7	-11	19	1	31	-7	7	2
80.73	168	46	-318	-221	-389	292	157	11	303	66	-43	284	+*******	8	3177	3	1	0	-9	-5	-33	-3	114	50	-13	-48	1	-50	-20	26	-53	40	26	-14	-113	343	34	147	21	-130	353	8	-12	16	6	32	-8	5	1
107.46	171	36	-371	-272	-381	295	157	11	303	67	-44	291	+*******	10	3194	1	1	0	-9	-2	-33	-2	119	48	-12	-47	-2	-57	-24	25	-66	46	27	-19	-110	343	36	145	24	-119	366	12	-11	6	4	31	-8	3	0
195.1	185	48	-518	-421	-364	307	160	12	302	71	-46	308	+*******	16	3236	-5	2	0	-11	3	-35	3	127	46	-11	-48	-7	-72	-32	24	-94	59	30	-28	-105	344	38	141	31	-97	378	22	-11	13	7	27	-5	-4	0
337.07	210	38	-761	-598	-328	336	165	11	305	80	-53	342	+*******	23	3320	-17	2	0	-12	9	-37	6	144	43	-11	-47	-16	-93	-40	24	-132	79	35	-39	-99	345	40	136	37	-69	422	35	-8	4	11	25	-4	-13	-1
424.66	229	32	-876	-667	-305	357	167	10	305	89	-57	363	+*******	28	3371	-22	2	0	-13	12	-37	8	155	42	-11	-48	-18	-103	-44	25	-149	89	39	-43	-97	345	41	134	41	-53	452	42	-8	6	14	23	-3	-20	0
478.87	242	9	-943	-705	-286	375	170	10	307	94	-61	379	+*******	29	3412	-26	3	-1	-13	13	-38	9	165	41	-12	-48	-21	-111	-47	26	-162	98	41	-47	-95	345	43	133	43	-40	476	48	-8	3	11	17	-6	-27	-3
533.84	255	17	-1011	-746	-265	399	172	9	306	105	-66	402	+*******	34	3474	-30	5	-3	-13	15	-37	10	184	40	-13	-47	-24	-124	-52	28	-183	116	47	-54	-92	344	44	130	48	-12	517	64	-8	17	18	24	0	-32	0
654.86	292	-8	-1145	-818	-221	454	175	7	302	133	-80	455	+*******	38	3594	-37	7	-5	-13	15	-36	11	237	38	-15	-47	-29	-142	-58	30	-211	149	58	-61	-92	344	46	129	53	29	590	85	-8	3	17	20	4	-38	-1
756.16	329	-33	-1246	-875	-180	507	179	5	297	166	-94	510	+*******	40	3701	-40	9	-7	-12	15	-35	11	287	37	-17	-47	-31	-155	-63	33	-230	176	67	-65	-90	343	47	128	56	63	644	101	-5	6	16	16	4	-45	0
809.68	358	-40	-1300	-906	-153	541	182	4	295	192	-102	545	+*******	42	3770	-40	11	-9	-12	15	-35	11	321	36	-18	-47	-33	-164	-65	34	-242	201	75	-68	-90	342	47	129	59	90	690	114	-5	18	17	16	6	-47	1
884.36	395	-62	-1364	-951	-112	592	186	3	290	232	-114	611	+*******	45	3895	-39	13	-11	-11	13	-32	11	388	35	-21	-47	-36	-182	-72	39	-265	254	89	-74	-90	341	48	128	64	144	801	141	1	8	14	16	5	-50	2
992.03	466	-86	-1443	-1008	-37	673	193	1	291	298	-129	713	+*******	48	4069	-33	17	-13	-11	15	-30	12	469	32	-20	-46	-39	-201	-77	49	-289	322	109	-82	-88	340	49	127	69	221	929	174	5	14	13	12	5	-58	3
1086.91	547	-115	-1511	-1063	43	762	199	0	286	362	-140	818	+*******	52	4237	-25	21	-14	-10	18	-28	13	540	31	-20	-46	-40	-220	-82	60	-311	386	125	-88	-86	340	51	125	72	293	1041	198	9	23	11	11	7	-61	3
1174.45	611	-132	-1565	-1109	110	834	205	-1	286	414	-151	908	+*******	56	4380	-18	24	-15	-10	18	-27	14	602	29	-20	-46	-42	-237	-87	73	-330	446	142	-95	-84	340	52	124	77	375	1167	231	11	20	12	9	6	-70	6
1282.39	696	-153	-1621	-1166	216	935	213	-3	281	484	-163	1033	+*******	63	4581	-7	28	-16	-10	20	-23	15	683	27	-20	-46	-43	-261	-94	88	-356	527	164	-103	-83	338	53	121	81	479	1328	273	13	20	14	10	6	-74	8
1417.72	809	-193	-1697	-1245	365	1064	223	-5	278	572	-178	1189	+*******	71	4830	7	33	-17	-10	23	-19	15	773	24	-19	-46	-45	-287	-101	104	-385	616	188	-114	-81	337	55	118	85	596	1504	315	15	7	13	6	8	-83	9
1552.99	914	-230	-1763	-1316	521	1181	233	-7	276	649	-191	1326	+*******	80	+*******	20	37	-17	-10	24	-14	16	846	22	-19	-46	-46	-311	-108	120	-410	691	209	-123	-78	337	57	115	90	703	1662	351	17	8	12	3	5	-91	11
1626.86	976	-253	-1800	-1355	608	1244	238	-8	278	690	-197	1394	+*******	84	+*******	25	38	-18	-9	26	-12	17	875	22	-18	-46	-47	-321	-110	124	-419	714	216	-126	-78	337	57	114	91	738	1704	361	19	10	12	6	7	-95	13
1653.7	996	-257	-1816	-1372	641	1270	241	-8	279	710	-199	1431	+*******	87	+*******	29	39	-18	-9	26	-11	17	892	21	-18	-46	-47	-327	-112	129	-426	735	222	-128	-77	337	57	113	92	769	1752	373	18	15	14	3	7	-97	13
1681.18	1017	-270	-1828	-1386	670	1292	242	-8	279	724	-201	1449	+*******	87	+*******	30	40	-18	-9	26	-10	17	900	21	-18	-47	-48	-330	-113	130	-430	740	224	-129	-77	337	58	112	93	780	1764	376	18	10	12	6	9	-98	14
1694.14	1024	-273	-1835	-1392	676	1298	242	-8	277	730	-202	1455	+*******	87	+*******	30	40	-17	-9	26	-10	17	903	21	-18	-47	-48	-330	-113	129	-431	742	226	-130	-77	337	58	112	93	784	1775	376	16	9	11	4	4	-100	13
1687.61	1026	-272	-1837	-1393	676	1301	242	-8	281	732	-202	1457	+*******	88	+*******	31	40	-17	-9	26	-10	17	903	21	-18	-47	-48	-330	-112	129	-430	740	227	-129	-77	337	58	112	92	784	1776	375	17	16	12	3	9	-98	11
1694.14	1027	-273	-1841	-1397	676	1304	242	-8	279	734	-203	1459	+*******	88	+*******	30	39	-17	-9	26	-10	17	904	21	-18	-47	-48	-331	-113	130	-432	742	227	-129	-77	337	58	112	92	789	1783	378	18	7	12	1	8	-98	12
1701.43	1030	-272	-1846	-1401	682	1309	242	-8	279	738	-203	1465	+*******	88	+*******	31	40	-17	-9	26	-9	17	907	21	-19	-47	-48	-333	-113	130	-433	743	228	-130	-77	336	58	112	93	794	1787	380	17	9	14	4	6	-97	10
1707.91	1036	-275	-1850	-1406	691	1315	243	-8	276	743	-203	1473	+*******	88	+*******	32	40	-17	-9	26	-9	17	910	21	-19	-47	-48	-335	-114	131	-436	750	230	-131	-77	336	58	112	94	807	1813	387	17	17	14	4	7	-97	10
1728.16	1055	-279	-1857	-1418	724	1335	244	-9	278	754	-205	1499	+*******	90	+*******	35	41	-17	-9	27	-8	18	921	21	-18	-47	-48	-339	-115	135	-441	763	234	-132	-76	336	59	111	94	828	1844	397	17	8	15	3	9	-100	11
1762.24	1077	-290	-1867	-1432	766	1361	245	-9	279	771	-208	1532	+*******	93	+*******	38	42	-17	-8	28	-7	18	939	20	-18	-47	-49	-347	-118	142	-449	786	240	-135	-75	335	59	110	96	864	1903	415	19	11	12	4	7	-102	11
1802.68	1110	-301	-1882	-1453	823	1398	248	-10	277	794	-211	1577	+*******	96	+*******	42	43	-18	-8	29	-5	18	960	19	-18	-47	-50	-355	-119	148	-458	813	247	-139	-73	335	60	109	98	902	1953	433	18	22	13	2	8	-105	12
1843.24	1139	-312	-1897	-1470	872	1429	250	-11	279	813	-214	1615	+*******	100	+*******	46	44	-18	-8	30	-3	19	977	19	-17	-47	-50	-362	-121	152	-466	832	253	-142	-73	335	61	109	98	935	2006	451	19	21	14	2	8	-107	14
1890.27	1175	-326	-1916	-1494	933	1469	254	-12	278	838	-218	1664	+*******	103	+*******	51	45	-19	-9	30	-2	19	1000	18	-17	-47	-50	-372	-124	159	-476	864	262	-145	-71	335	61	108	100	978	2070	472	18	5	14	2	10	-110	17
1937.25	1207	-338	-1932	-1514	986	1505	256	-12	278	860	-221	1707	+*******	106	+*******	55	47	-19	-8	31	1	20	1019	17	-17	-47	-52	-379	-126	164	-484	885	268	-148	-71	335	61	107	102	1013	2123	489	21	20	13	2	9	-114	15
1977.86	1239	-347	-1949	-1535	1038	1540	258	-13	275	882	-225	1749	+*******	110	+*******	58	48	-19	-8	32	2	20	1036	16	-16	-47	-52	-387	-128	170	-492	911	276	-151	-70	335	62	107	104	1051	2172	506	20	21	13	2	11	-114	13
2025.7	1275	-362	-1967	-1556	1099	1580	261	-14	273	908	-227	1797	+*******	114	+*******	63	49	-19	-8	33	4	21	1056	16	-16	-47	-52	-396	-131	176	-502	937	283	-155	-68	335	63	106	105	1091	2226	523	20	19	13	2	8	-117	15
2066.2	1310	-370	-1988	-1578	1159	1618	263	-15	270	933	-231	1844	+*******	117	+*******	67	51	-20	-8	34	5	21	1075	15	-15	-47	-53	-404	-133	182	-512	961	290	-158	-67	335	64	105	106	1132	2288	544	20	10	15	0	11	-120	17
2119.82	1343	-388	-2009	-1600	1217	1656	266	-16	271	957	-233	1888	+*******	121	+*******	71	52	-20	-8	35	7	21	1092	15	-15	-47	-54	-413	-136	187	-523	987	298	-163	-67	335	64	104	107	1171	2345	567	21	11	14	1	10	-123	15
2160.32	1370	-398	-2029	-1619	1268	1689	269	-17	273	979	-235	1928	+*******	125	+*******	75	53	-21	-8	36	8	21	1108	14	-15	-47	-54	-423	-138	192	-533	1010	306	-166	-66	334	65	103	108	1210	2395	583	21	16	14	1	9	-125	18
2214.59	1407	-412	-2051	-1642	1336	1731	272	-18	271	1008	-238	1980	+*******	131	+*******	80	55	-21	-8	38	10	22	1129	13	-14	-48	-55	-433	-141	199	-544	1038	316	-170	-65	335	66	102	110	1255	2441	599	21	20	13	1	12	-130	16
2261.57	1442	-422	-2072	-1662	1400	1774	275	-19	269	1037	-241	2029	+*******	137	+*******	84	58	-22	-9	39	12	22	1147	12	-14	-48	-56	-443	-143	206	-555	1065	327	-174	-62	335	66	101	111	1297	2493	616	23	5	16	2	14	-134	18
2315.9	1478	-442	-2098	-1683	1463	1818	279	-20	271	1069	-244	2082	+*******	145	+*******	88	59	-24	-8	40	14	23	1169	12	-13	-47	-56	-452	-146	213	-567	1095	338	-179	-59	336	67	99	113	1341	2569	633	21	19	15	-2	15	-134	17
2362.88	1512	-456	-2121	-1705	1518	1861	282	-20	274	1105	-248	2133	+*******	155	+*******	92	60	-23	-9	42	16	23	1189	11	-13	-48	-57	-461	-149	219	-578	1126	353	-183	-57	338	67	97	114	1384	2631	651	23	7	17	2	13	-140	19
2410.02	1552	-462	-2145	-1726	1572	1913	287	-19	268	1148	-254	2191	+*******	170	+*******	97	62	-21	-10	42	18	24	1217	10	-13	-48	-57	-470	-151	225	-588	1160	368	-186	-54	340	68	94	115	1428	2686	665	23	10	20	1	13	-141	21
2437.45	1580	-467	-2161	-1737	1601	1962	291	-15	269	1187	-264	2227	+*******	182	+*******	99	63	-19	-9	44	19	23	1236	10	-13	-48	-57	-471	-150	226	-590	1174	377	-186	-54	340	68	91	115	1436	2692	661	22	13	26	1	11	-140	21
2430.16	1581	-466	-2166	-1736	1598	1980	292	-11	271	1203	-267	2232	+*******	188	+*******	99	63	-18	-10	42	19	24	1243	10	-14	-48	-57	-471	-150	225	-591	1178	381	-186	-55	338	67	89	115	1438	2690	660	21	10	32	1	12	-138	21
2443.99	1589	-469	-2176	-1743	1605	2007	294	-8	274	1222	-271	2246	+*******	195	+*******	99	64	-17	-10	42	19	23	1252	10	-14	-48	-58	-474	-151	226	-594	1187	387	-187	-55	342	67	87	114	1448	2699	662	21	9	34	3	13	-140	23
2417.26	1593	-459	-2187	-1743	1591	2053	297	1	280	1250	-278	2253	+*******	207	+*******	98	64	-15	-10	41	19	23	1268	10	-14	-48	-57	-472	-150	222	-593	1190	397	-186	-55	342	68	82	114	1444	2688	653	23	8	52	3	11	-135	23
2409.97	1593	-463	-2189	-1743	1582	2059	298	4	278	1255	-278	2253	+*******	208	+*******	98	65	-14	-10	41	20	23	1270	10	-15	-49	-57	-471	-150	222	-592	1187	398	-186	-55	341	67	81	114	1441	2676	651	22	8	53	0	12	-134	24
2423.68	1594	-458	-2192	-1743	1579	2063	298	6	281	1258	-279	2254	+*******	209	+*******	97	65	-14	-9	41	20	23	1271	10	-15	-49	-57	-471	-150	222	-594	1188	400	-186	-55	340	67	81	114	1443	2682	652	22	10	58	2	12	-133	25
2396.95	1588	-443	-2218	-1750	1540	2154	312	31	302	1326	-285	2277	+*******	231	+*******	94	68	-8	-8	41	21	23	1298	12	-15	-48	-55	-470	-148	218	-594	1194	416	-184	-53	337	69	75	114	1442	2694	647	26	8	91	4	8	-129	26
2389.66	1588	-450	-2220	-1751	1537	2155	311	32	302	1327	-285	2276	+*******	231	+*******	94	68	-8	-8	41	22	24	1298	11	-15	-48	-55	-470	-148	219	-594	1193	415	-184	-53	336	69	75	113	1441	2692	646	23	12	94	1	13	-132	27
2383.13	1587	-447	-2220	-1751	1535	2156	311	33	301	1327	-286	2276	+*******	231	+*******	94	69	-8	-8	41	22	23	1298	12	-15	-48	-55	-469	-148	219	-593	1191	416	-184	-53	335	68	74	114	1435	2660	642	23	14	95	1	11	-129	25
2208.06	1578	-434	-2212	-1739	1510	2142	312	34	305	1322	-284	2257	+*******	229	+*******	93	67	-7	-9	41	21	23	1293	12	-14	-49	-54	-462	-146	216	-584	1181	411	-180	-53	336	68	75	114	1413	2648	624	22	25	96	1	10	-127	27
2119.72	1549	-418	-2184	-1704	1436	2105	308	36	306	1303	-281	2210	+*******	224	+*******	90	66	-5	-10	42	20	24	1280	13	-12	-48	-50	-441	-138	207	-558	1145	396	-171	-54	338	66	77	112	1330	2518	557	23	14	96	3	10	-123	27
1937.2	1487	-382	-2130	-1633	1285	2020	304	39	306	1260	-274	2112	+*******	216	+*******	82	64	-1	-11	46	18	25	1259	16	-9	-49	-46	-416	-130	192	-530	1095	377	-160	-54	341	65	78	108	1238	2391	490	24	29	97	1	9	-114	23
1782.27	1408	-337	-2076	-1557	1117	1923	298	41	313	1209	-265	2003	+*******	207	+*******	71	62	1	-12	48	13	26	1232	18	-5	-50	-42	-393	-122	178	-505	1041	354	-153	-55	343	63	80	104	1140	2245	426	21	26	100	3	4	-106	20
1626.75	1320	-301	-2023	-1484	948	1822	292	43	317	1152	-254	1890	+*******	199	+*******	59	59	2	-15	51	8	27	1200	20	-2	-50	-39	-372	-116	164	-480	983	331	-145	-55	345	62	80	100	1041	2099	366	18	27	103	2	3	-102	16
1478.3	1228	-265	-1965	-1406	777	1707	285	45	320	1085	-241	1770	+*******	190	+*******	48	58	3	-16	53	2	29	1163	22	2	-51	-36	-349	-108	149	-457	919	307	-137	-53	347	61	81	98	938	1949	306	17	14	102	5	3	-94	17
1370.47	1157	-239	-1920	-1347	654	1614	279	45	320	1031	-231	1677	+*******	183	+*******	40	55	4	-18	54	-2	30	1129	24	3	-52	-34	-332	-103	137	-438	870	289	-131	-54	350	60	82	96	856	1825	271	14	20	102	6	2	-89	11
1261.98	1074	-215	-1876	-1285	528	1506	273	45	323	967	-219	1570	+*******	173	+*******	31	53	4	-18	53	-6	30	1086	25	3	-52	-32	-312	-98	122	-419	807	270	-124	-56	353	60	84	93	769	1704	233	11	11	103	6	1	-83	10
1180.87	994	-190	-1838	-1231	418	1396	265	46	319	904	-209	1468	+*******	161	+*******	22	49	5	-18	49	-11	28	1036	28	0	-52	-32	-293	-93	106	-400	748	254	-117	-59	353	59	85	90	684	1588	205	9	13	101	8	2	-80	11
1093.28	912	-162	-1798	-1177	311	1284	257	46	325	832	-199	1364	+*******	149	+*******	14	46	6	-18	45	-15	26	968	29	-2	-52	-31	-272	-88	92	-376	673	232	-107	-63	353	57	88	85	582	1443	170	7	23	103	6	0	-72	11
965.14	808	-141	-1742	-1102	174	1128	247	46	327	728	-182	1206	+*******	131	+*******	2	39	6	-17	39	-21	24	845	32	-4	-52	-28	-240	-80	73	-339	559	201	-93	-69	352	54	92	78	452	1237	138	4	15	97	8	-4	-63	7
837.05	691	-105	-1666	-1017	49	980	235	45	331	617	-163	1055	+*******	115	+*******	-7	33	7	-16	34	-26	22	719	35	-5	-51	-27	-213	-73	59	-308	462	174	-83	-75	351	51	98	73	352	1075	115	-1	21	95	10	-1	-52	8
708.16	565	-60	-1560	-918	-75	827	220	43	335	487	-141	887	+*******	99	+*******	-16	26	7	-15	28	-30	19	577	37	-6	-51	-23	-184	-64	50	-269	349	143	-71	-80	349	49	104	65	241	891	92	-5	14	89	13	-1	-42	5
553.28	454	-16	-1430	-816	-187	686	204	41	339	356	-118	718	+*******	81	+*******	-22	17	7	-14	21	-33	15	418	40	-8	-51	-19	-147	-54	40	-220	225	105	-57	-85	349	46	110	55	119	672	63	-10	23	84	15	-5	-32	4
431.62	365	19	-1278	-722	-269	575	191	39	338	260	-99	597	+*******	67	+*******	-22	13	8	-13	17	-35	12	325	42	-8	-51	-14	-124	-47	35	-186	159	86	-47	-89	346	43	115	48	43	577	44	-10	18	78	19	-3	-24	5
283.34	283	52	-1070	-608	-351	466	176	39	338	173	-79	471	+*******	51	+*******	-16	7	9	-12	9	-33	7	218	46	-10	-51	-8	-90	-35	27	-131	80	59	-31	-98	346	39	123	37	-52	419	14	-14	12	69	23	-6	-14	4
60.26	199	62	-691	-408	-429	358	160	36	337	102	-58	356	+*******	32	+*******	-3	2	8	-9	0	-32	2	152	49	-12	-50	-1	-63	-25	25	-80	35	42	-18	-105	345	36	130	26	-116	362	-8	-18	13	51	29	-8	-2	5
-0.59	172	57	-479	-303	-449	326	153	33	333	81	-52	322	+*******	25	+*******	3	0	7	-8	-3	-32	0	138	50	-13	-50	2	-55	-20	25	-66	25	38	-14	-109	344	35	131	23	-134	358	-12	-22	12	45	29	-9	4	5
-0.54	162	54	-398	-269	-451	316	151	33	335	73	-48	311	+*******	23	+*******	4	0	6	-8	-4	-32	-2	134	51	-13	-49	3	-52	-19	25	-60	25	36	-12	-110	344	34	132	21	-142	345	-14	-19	18	41	31	-11	7	4
-0.54	157	54	-353	-255	-449	310	149	32	336	69	-47	304	+*******	21	+*******	7	0	6	-8	-4	-32	-3	131	51	-13	-49	4	-49	-18	25	-56	26	35	-11	-111	344	34	133	20	-147	321	-14	-19	9	40	29	-9	7	5
-0.54	154	57	-330	-248	-446	308	148	31	339	67	-46	301	+*******	20	+*******	7	0	6	-8	-4	-32	-3	130	51	-13	-48	4	-48	-18	26	-54	30	33	-10	-111	343	34	133	19	-149	337	-14	-20	14	39	30	-9	8	4
26.3	153	54	-319	-245	-443	307	147	31	341	66	-46	300	+*******	20	+*******	8	0	6	-8	-4	-32	-2	131	51	-13	-47	4	-48	-17	26	-54	34	35	-10	-111	343	34	133	20	-150	335	-14	-17	20	34	38	-11	8	5
32.89	152	50	-316	-245	-440	307	146	31	341	65	-46	300	+*******	21	+*******	8	0	5	-8	-4	-32	-2	131	51	-13	-47	4	-48	-18	26	-54	32	35	-11	-111	343	34	133	20	-150	309	-14	-19	21	36	33	-9	7	5
40.07	152	52	-316	-245	-436	306	145	31	340	65	-46	300	+*******	21	+*******	7	0	5	-8	-4	-32	-3	131	51	-12	-47	4	-48	-18	26	-54	35	33	-11	-111	343	34	132	20	-150	336	-14	-18	11	36	31	-10	9	1
53.19	152	49	-324	-250	-430	306	145	30	342	64	-46	301	+*******	21	+*******	7	0	6	-8	-4	-32	-2	133	51	-12	-47	3	-49	-18	26	-56	40	35	-11	-111	343	34	132	21	-149	336	-13	-17	12	35	32	-9	5	4
73.44	154	51	-341	-261	-425	307	145	30	342	65	-47	304	+*******	22	+*******	5	0	5	-8	-3	-32	-2	135	51	-12	-47	3	-52	-19	26	-60	42	36	-13	-110	343	35	132	22	-146	340	-12	-16	11	37	30	-9	6	5
101.03	157	49	-379	-299	-417	311	145	31	342	66	-47	309	+*******	24	+*******	3	1	5	-9	-2	-32	0	137	50	-12	-46	1	-56	-21	26	-69	46	36	-15	-108	343	35	131	24	-139	333	-10	-15	9	37	32	-10	4	4
141.53	163	49	-457	-375	-407	319	146	31	342	69	-49	318	+*******	26	+*******	0	2	6	-9	1	-33	3	142	49	-11	-46	-1	-63	-25	25	-81	52	36	-20	-105	344	37	129	28	-130	366	-5	-16	20	36	30	-6	0	2
182.03	172	56	-532	-443	-395	326	148	31	342	71	-51	327	+*******	29	+*******	-3	2	6	-10	3	-33	4	146	48	-11	-46	-3	-68	-28	26	-90	58	38	-23	-104	344	37	128	29	-124	360	-2	-14	10	41	29	-8	0	2
222.7	178	54	-602	-497	-383	334	148	30	343	74	-53	334	+*******	31	+*******	-7	1	5	-10	5	-35	5	150	47	-11	-46	-5	-73	-29	25	-99	66	41	-25	-101	344	38	127	31	-117	371	1	-15	8	41	29	-5	-9	3
243	182	51	-632	-520	-376	339	149	31	344	76	-54	339	+*******	33	+*******	-9	2	5	-11	6	-35	5	153	47	-10	-46	-6	-76	-31	25	-107	68	39	-27	-100	344	38	126	33	-111	383	4	-16	20	41	24	-7	-7	4
283.55	189	45	-695	-566	-364	349	150	30	343	79	-57	348	+*******	35	+*******	-14	2	5	-11	7	-36	6	158	46	-10	-46	-9	-84	-34	25	-119	76	41	-31	-98	345	39	124	35	-101	392	8	-14	17	41	27	-4	-8	4
324	197	49	-755	-603	-352	360	152	30	344	82	-59	357	+*******	37	+*******	-18	2	5	-11	9	-37	7	164	45	-10	-46	-10	-88	-36	26	-128	83	42	-33	-97	344	41	123	36	-94	396	12	-13	7	44	27	1	-11	-2
371.09	205	43	-819	-641	-338	375	153	30	347	88	-63	369	+*******	39	+*******	-22	2	4	-11	11	-37	8	172	44	-10	-46	-12	-95	-39	26	-141	90	47	-37	-95	345	41	121	40	-83	401	18	-13	10	45	26	-4	-15	3
418.12	213	36	-883	-679	-324	393	154	29	345	94	-67	382	+*******	41	+*******	-26	3	4	-12	12	-37	9	181	44	-11	-46	-14	-102	-42	27	-152	97	49	-40	-94	345	43	119	42	-71	464	23	-12	13	47	23	-4	-18	4
485.35	227	31	-963	-722	-305	419	156	28	342	105	-74	403	+*******	44	+*******	-31	4	3	-12	13	-37	10	197	42	-11	-46	-18	-112	-45	28	-167	106	53	-45	-92	344	43	117	45	-55	469	30	-11	16	48	22	-3	-24	1
533.2	239	20	-1026	-754	-288	443	157	28	341	116	-80	419	+*******	46	+*******	-34	6	2	-12	15	-38	11	212	42	-12	-46	-19	-119	-47	28	-177	119	57	-49	-91	344	44	117	47	-43	489	35	-9	7	48	23	-2	-25	0
560.09	248	17	-1059	-770	-276	458	158	28	341	123	-83	430	+*******	48	+*******	-36	6	2	-12	15	-37	11	223	41	-12	-46	-21	-123	-50	28	-185	123	60	-51	-91	344	45	116	48	-33	528	41	-8	22	50	22	0	-30	3
614.36	262	5	-1125	-804	-254	490	160	27	340	141	-91	457	+*******	50	+*******	-40	7	0	-11	16	-37	12	256	40	-14	-46	-23	-133	-53	29	-200	144	67	-55	-89	343	46	115	52	-11	548	54	-7	8	50	18	0	-30	2
667.87	281	-9	-1182	-834	-232	523	162	26	337	162	-99	484	+*******	51	+*******	-42	9	-1	-11	16	-36	11	283	39	-15	-46	-25	-140	-56	30	-211	160	73	-57	-89	343	46	115	54	6	560	63	-7	19	49	20	1	-37	2
722.14	301	-15	-1238	-864	-207	554	164	25	337	186	-107	513	+*******	52	+*******	-44	10	-2	-11	15	-36	12	313	39	-16	-46	-27	-148	-58	31	-223	177	79	-60	-89	342	47	115	56	27	609	73	-8	7	49	20	0	-37	4
762.64	318	-28	-1279	-887	-185	585	166	25	335	210	-113	542	+*******	54	+*******	-45	11	-3	-11	15	-35	12	345	38	-17	-45	-29	-155	-61	33	-234	197	86	-63	-88	341	47	114	58	49	635	85	-5	16	50	17	2	-42	4
843.8	356	-42	-1349	-928	-140	636	170	24	332	255	-127	602	+*******	57	+*******	-45	13	-4	-10	14	-33	12	403	37	-19	-45	-31	-169	-65	35	-253	239	101	-68	-88	340	48	113	62	90	662	105	1	18	50	21	-2	-44	4
911.14	395	-66	-1411	-968	-96	689	175	23	328	297	-138	660	+*******	59	+*******	-43	15	-6	-9	13	-31	12	454	36	-21	-45	-33	-182	-70	38	-267	274	112	-72	-86	340	49	112	67	131	795	121	6	6	46	16	0	-51	5
979.18	449	-98	-1462	-1005	-42	753	180	22	328	346	-148	735	+*******	64	+*******	-39	18	-6	-10	15	-31	13	513	33	-20	-45	-36	-196	-74	45	-284	326	130	-77	-86	338	50	110	69	186	881	143	8	22	-29	13	3	-57	5
1079.73	526	-95	-1531	-1057	37	848	187	21	327	414	-162	844	+*******	70	+*******	-32	21	-7	-9	17	-29	13	591	32	-19	-45	-38	-215	-80	55	-308	399	152	-85	-83	338	51	106	74	270	1085	175	18	8	54	13	2	-58	6
1160.78	591	-115	-1580	-1098	99	928	193	21	326	474	-172	940	+*******	77	+*******	-25	25	-8	-9	19	-27	15	661	30	-19	-45	-40	-233	-85	68	-329	468	172	-92	-82	337	52	102	78	355	1154	204	13	21	57	13	3	-65	7
1249.07	669	-136	-1636	-1147	179	1024	201	22	327	542	-183	1049	+*******	86	+*******	-17	29	-8	-9	20	-24	15	731	29	-19	-45	-40	-253	-91	80	-350	537	193	-99	-80	337	53	99	80	444	1222	237	12	24	61	8	1	-65	10
1377.22	779	-168	-1710	-1219	303	1161	212	22	325	642	-198	1208	+*******	101	+*******	-5	34	-8	-9	22	-20	16	826	25	-18	-45	-43	-280	-98	96	-381	634	220	-110	-79	335	55	93	86	570	1502	283	20	12	67	9	4	-74	10
1492.29	873	-199	-1769	-1278	415	1274	223	24	324	723	-209	1335	+*******	114	+*******	5	37	-8	-9	24	-15	17	897	24	-18	-45	-44	-303	-103	109	-405	715	245	-119	-76	335	56	89	89	676	1614	320	14	21	67	5	3	-79	10
1606.66	961	-223	-1820	-1332	528	1379	232	24	324	797	-219	1452	+*******	126	+*******	17	42	-9	-9	26	-12	18	957	23	-17	-45	-45	-322	-108	121	-426	778	265	-126	-74	335	58	86	93	765	1721	354	11	24	73	6	4	-84	15
1687.66	1026	-242	-1862	-1372	607	1451	238	25	323	848	-225	1523	+*******	134	+*******	21	43	-8	-8	26	-9	18	983	22	-18	-45	-46	-330	-111	124	-433	795	272	-128	-75	335	58	85	93	790	1797	364	18	20	75	4	4	-88	16
1714.45	1047	-249	-1879	-1390	631	1476	240	26	322	866	-227	1547	+*******	135	+*******	23	43	-8	-8	26	-9	18	994	21	-18	-46	-46	-333	-112	125	-437	803	276	-129	-76	334	58	84	94	804	1738	364	20	12	75	3	5	-90	19
1701.49	1048	-255	-1884	-1392	625	1478	240	26	323	871	-227	1548	+*******	136	+*******	23	43	-8	-8	26	-9	17	996	21	-18	-46	-46	-334	-112	126	-439	802	277	-129	-76	334	58	84	94	812	1800	367	21	13	77	3	3	-90	16
1728.16	1058	-261	-1895	-1403	643	1493	241	26	324	882	-229	1567	+*******	137	+*******	25	44	-8	-8	26	-8	18	1005	21	-17	-46	-46	-340	-113	131	-446	820	281	-132	-74	335	59	83	95	842	1850	380	23	22	78	4	3	-91	15
1782.38	1105	-269	-1912	-1429	719	1551	245	26	322	922	-234	1638	+*******	147	+*******	31	47	-8	-8	28	-5	19	1038	19	-17	-46	-48	-353	-117	140	-459	863	294	-137	-73	334	60	81	97	904	1977	409	26	12	79	2	6	-93	15
1843.24	1155	-292	-1937	-1460	793	1610	251	26	322	961	-240	1706	+*******	154	+*******	37	49	-8	-8	30	-3	19	1069	19	-17	-46	-48	-364	-120	148	-472	899	306	-141	-73	334	60	79	99	961	2044	433	22	20	82	5	7	-99	19
1910.63	1210	-305	-1964	-1491	876	1675	257	27	319	1006	-246	1781	+*******	164	+*******	44	51	-8	-9	31	0	20	1101	18	-16	-46	-49	-379	-123	157	-486	942	321	-147	-71	335	61	78	101	1024	2136	463	12	25	84	3	5	-102	20
1991.63	1269	-328	-1997	-1528	966	1745	261	27	320	1054	-252	1860	+*******	175	+*******	51	53	-9	-8	32	3	20	1136	17	-16	-46	-50	-392	-128	166	-501	986	333	-152	-69	334	62	76	104	1088	2216	496	18	12	84	3	6	-105	17
2066.2	1326	-345	-2030	-1563	1058	1817	266	28	319	1105	-259	1942	+*******	187	+*******	58	57	-9	-8	34	7	21	1170	15	-15	-46	-50	-407	-132	177	-519	1033	348	-158	-67	335	63	74	106	1159	2295	527	20	12	89	3	8	-109	20
2133.54	1377	-369	-2060	-1593	1139	1879	271	29	317	1147	-263	2010	+*******	197	+*******	64	60	-9	-8	36	9	22	1197	14	-14	-46	-52	-420	-135	185	-534	1071	363	-164	-64	336	64	72	108	1217	2422	556	22	23	91	0	5	-114	19
2208.06	1424	-380	-2095	-1626	1221	1943	277	31	319	1193	-268	2081	+*******	208	+*******	69	61	-9	-9	37	11	22	1225	13	-14	-46	-54	-435	-140	193	-550	1112	374	-170	-62	336	65	71	110	1280	2484	580	26	12	95	2	8	-117	22
2281.93	1478	-399	-2129	-1656	1310	2017	284	34	318	1246	-273	2161	+*******	223	+*******	76	65	-9	-9	40	14	23	1254	12	-13	-47	-54	-449	-143	204	-567	1157	392	-176	-58	337	66	69	112	1346	2508	609	27	26	97	3	6	-120	22
2356.4	1534	-415	-2166	-1687	1389	2094	290	39	322	1304	-277	2241	+*******	237	+*******	83	69	-9	-9	42	16	23	1285	12	-13	-47	-55	-463	-147	213	-585	1202	409	-182	-56	337	67	66	112	1412	2742	632	38	15	103	2	6	-122	25
2443.99	1598	-432	-2209	-1722	1473	2191	299	52	324	1381	-282	2337	+*******	261	+*******	90	74	-7	-10	45	20	24	1327	10	-12	-47	-56	-479	-151	224	-603	1260	427	-189	-52	338	68	63	114	1487	2770	657	28	15	117	2	9	-127	26
2504.84	1644	-432	-2240	-1746	1547	2323	305	76	335	1465	-292	2402	+*******	282	+*******	93	80	-3	-10	45	23	24	1376	9	-12	-47	-57	-486	-154	226	-613	1298	450	-191	-45	340	68	60	115	1518	2796	661	27	14	144	4	10	-127	27
2511.38	1652	-419	-2251	-1748	1571	2405	309	96	350	1508	-298	2411	+*******	286	+*******	91	84	1	-10	45	24	24	1397	9	-13	-48	-56	-487	-153	225	-613	1304	458	-191	-45	345	67	60	113	1516	2786	656	26	26	180	5	7	-123	30
2518.51	1659	-412	-2265	-1753	1603	2466	312	116	376	1546	-303	2423	+*******	288	+*******	92	89	5	-9	45	25	24	1415	10	-13	-47	-57	-487	-153	223	-615	1309	467	-191	-44	342	67	59	114	1513	2781	653	22	16	229	4	7	-120	31
2504.79	1655	-406	-2268	-1752	1604	2484	313	124	392	1557	-305	2421	+*******	288	+*******	91	91	7	-10	44	25	23	1420	10	-13	-48	-56	-486	-152	222	-615	1310	468	-190	-43	346	68	59	114	1507	2777	649	19	16	251	4	7	-119	31
2470.77	1650	-396	-2274	-1748	1589	2506	316	141	412	1570	-305	2417	+*******	286	+*******	90	94	10	-9	44	25	23	1423	10	-14	-48	-56	-483	-151	218	-613	1304	472	-189	-45	336	67	59	113	1495	2769	643	15	14	290	5	5	-119	32
2464.34	1648	-401	-2276	-1747	1584	2509	321	144	421	1572	-306	2415	+*******	286	+*******	90	94	10	-10	44	25	23	1423	10	-14	-48	-56	-483	-151	218	-614	1301	474	-189	-44	334	67	60	113	1492	2794	642	18	17	295	7	6	-117	32
2484.54	1648	-406	-2278	-1748	1582	2513	319	146	422	1574	-306	2415	+*******	285	+*******	90	94	11	-9	44	26	23	1423	10	-14	-48	-56	-483	-150	218	-614	1300	474	-189	-44	333	67	59	114	1492	2778	643	15	21	299	3	4	-115	30
2491.07	1650	-391	-2282	-1751	1585	2520	319	148	424	1578	-307	2419	+*******	286	+*******	90	95	11	-10	44	25	23	1425	10	-14	-48	-56	-484	-151	218	-615	1303	476	-190	-44	332	67	59	113	1495	2767	645	14	15	306	4	4	-116	31
2504.84	1654	-399	-2289	-1755	1592	2532	319	150	431	1585	-307	2426	+*******	287	+*******	90	96	12	-10	44	26	23	1427	10	-14	-48	-57	-486	-152	218	-617	1306	478	-190	-43	332	67	59	114	1498	2752	648	13	18	307	5	4	-119	33
2504.84	1658	-398	-2293	-1758	1596	2543	319	155	441	1593	-308	2432	+*******	288	+*******	90	96	12	-10	44	26	22	1429	10	-14	-48	-56	-486	-152	218	-618	1304	480	-190	-45	332	67	59	112	1499	2790	649	13	16	316	7	3	-115	31
2504.79	1658	-392	-2296	-1759	1598	2553	320	157	453	1597	-308	2434	+*******	288	+*******	91	97	13	-10	44	26	23	1430	11	-14	-48	-56	-486	-152	218	-618	1307	482	-190	-44	331	67	59	112	1497	2783	648	18	14	319	6	4	-118	33
2498.2	1657	-389	-2296	-1758	1597	2557	320	160	463	1599	-308	2434	+*******	288	+*******	90	97	13	-9	44	26	22	1431	11	-15	-48	-57	-486	-151	217	-618	1308	483	-189	-42	330	67	59	112	1495	2772	646	22	17	326	5	1	-115	33
2491.07	1659	-360	-2315	-1763	1601	2619	322	203	557	1637	-312	2449	+*******	290	+*******	89	103	19	-9	44	27	23	1440	12	-14	-48	-56	-487	-152	212	-622	1307	499	-189	-44	320	66	59	113	1488	2776	646	18	12	383	8	0	-112	33
2491.07	1660	-371	-2315	-1763	1600	2619	323	207	569	1638	-312	2449	+*******	290	+*******	89	103	20	-9	44	28	23	1440	13	-15	-48	-56	-486	-151	214	-621	1307	500	-189	-45	321	66	59	111	1487	2587	646	24	27	385	7	3	-113	36
2484.49	1657	-371	-2316	-1762	1599	2617	323	211	572	1638	-312	2447	+*******	290	+*******	89	103	20	-9	44	27	23	1440	13	-15	-48	-56	-486	-151	213	-621	1310	500	-189	-45	321	66	59	112	1485	2765	645	18	13	391	7	0	-110	37
2484.49	1658	-370	-2316	-1761	1598	2617	323	216	569	1638	-312	2447	+*******	290	+*******	89	104	20	-9	42	27	23	1440	12	-14	-48	-56	-486	-151	213	-621	1307	502	-189	-45	320	66	59	111	1484	2809	644	18	25	393	7	0	-112	36
2477.95	1656	-376	-2317	-1762	1596	2616	323	222	583	1637	-312	2447	+*******	290	+*******	89	104	19	-9	42	28	22	1440	13	-14	-48	-57	-486	-151	213	-621	1304	500	-189	-46	319	66	59	111	1482	2751	644	16	15	398	9	-1	-109	34
2362.88	1654	-361	-2316	-1760	1590	2610	322	230	590	1634	-312	2443	+*******	289	+*******	89	104	20	-9	44	27	23	1439	13	-14	-48	-56	-484	-150	212	-619	1303	501	-188	-45	319	66	60	112	1476	2749	639	21	16	404	7	-1	-109	35
2275.34	1649	-354	-2313	-1753	1575	2600	322	235	598	1627	-310	2432	+*******	288	+*******	89	103	21	-9	44	27	23	1435	13	-14	-48	-55	-477	-147	209	-609	1294	495	-184	-45	319	66	60	111	1446	2656	612	13	24	406	7	-1	-107	33
2147.09	1601	-321	-2267	-1694	1463	2524	319	234	587	1575	-306	2346	+*******	278	+*******	85	101	23	-10	45	26	24	1417	15	-11	-49	-50	-451	-138	196	-577	1242	473	-173	-46	322	65	62	110	1354	2620	544	14	15	406	5	-2	-100	31
1903.93	1501	-275	-2184	-1589	1244	2379	314	227	579	1474	-297	2187	+*******	260	+*******	72	96	26	-13	49	21	26	1376	19	-5	-49	-43	-408	-124	174	-528	1147	429	-156	-46	324	62	64	103	1163	2368	418	23	15	399	7	-4	-93	28
1646.95	1375	-229	-2103	-1475	1007	2205	307	218	562	1357	-282	2006	+*******	243	+*******	58	92	25	-15	54	13	29	1334	22	0	-50	-39	-379	-114	156	-497	1066	396	-146	-45	326	61	66	101	1045	2177	353	38	27	394	5	-4	-87	23
1451.52	1228	-186	-2014	-1360	783	2017	297	205	547	1222	-263	1804	+*******	222	+*******	41	87	22	-18	56	3	30	1257	28	2	-52	-33	-333	-102	121	-448	911	345	-128	-49	330	59	69	94	794	1829	228	42	15	385	4	-5	-79	20
1052.68	876	-105	-1846	-1131	329	1505	267	176	507	871	-217	1320	+*******	157	+*******	10	66	21	-16	40	-18	24	1020	34	-4	-52	-28	-255	-81	67	-362	627	263	-96	-63	330	53	77	80	472	1314	143	33	18	347	9	-10	-59	15
850.01	680	-53	-1724	-1004	132	1234	248	159	487	669	-189	1066	+*******	128	+*******	-6	54	20	-16	33	-26	21	831	37	-6	-51	-25	-213	-71	49	-315	474	212	-80	-70	330	50	84	71	311	1092	108	37	17	319	11	-9	-48	13
674.84	523	-12	-1587	-891	-21	1011	230	144	470	484	-160	839	+*******	103	+*******	-18	43	21	-14	25	-32	17	630	41	-8	-51	-19	-171	-58	41	-260	295	170	-63	-77	331	46	96	59	154	838	71	15	26	295	14	-10	-37	9
498.96	389	26	-1405	-779	-153	820	209	131	453	323	-130	640	+*******	79	+*******	-26	32	19	-13	18	-35	13	449	45	-9	-51	-13	-133	-46	35	-205	157	124	-45	-83	329	42	106	47	15	651	37	12	16	257	20	-10	-29	10
275.94	263	70	-1104	-635	-281	620	188	117	432	183	-92	452	+*******	53	+*******	-24	23	17	-11	9	-34	8	275	49	-11	-51	-4	-93	-32	29	-142	67	82	-27	-92	330	37	119	35	-94	520	6	1	27	201	23	-13	-13	8
86.94	183	81	-725	-466	-366	469	173	103	413	104	-64	342	+*******	34	+*******	-11	17	15	-9	1	-33	3	180	52	-12	-50	3	-68	-22	28	-97	24	58	-16	-99	328	35	126	25	-145	503	-12	7	13	145	27	-14	-3	4
5.99	160	78	-520	-368	-390	413	167	98	404	78	-54	308	+*******	25	+*******	-3	15	14	-8	-2	-32	1	153	54	-12	-49	6	-58	-18	28	-81	13	51	-12	-102	327	34	129	21	-163	89	-16	-10	27	125	30	-14	2	6
-0.59	148	75	-420	-325	-397	389	164	95	401	69	-50	294	+*******	22	+*******	0	14	13	-7	-3	-32	0	144	54	-12	-48	7	-55	-16	28	-74	16	49	-10	-104	326	33	130	21	-171	456	-20	-1	24	118	29	-13	3	5
-0.59	144	70	-374	-310	-397	380	163	93	398	65	-48	287	+*******	21	+*******	2	14	12	-7	-4	-31	0	140	54	-12	-48	7	-53	-16	29	-70	14	47	-9	-105	326	33	131	20	-175	323	-20	-3	12	116	32	-14	5	2
-0.54	141	69	-348	-303	-395	374	162	92	397	63	-47	283	+*******	20	+*******	3	13	12	-7	-4	-31	-2	138	54	-13	-48	7	-52	-16	29	-68	18	47	-9	-104	326	33	131	19	-178	342	-21	-6	27	107	31	-14	6	6
-0.54	139	72	-330	-298	-393	370	161	91	396	61	-47	282	+*******	19	+*******	4	14	12	-7	-4	-31	-2	136	54	-12	-47	8	-51	-15	29	-66	18	43	-8	-106	326	33	132	18	-180	368	-21	-3	23	107	29	-12	4	6
-0.54	136	77	-310	-292	-393	366	160	90	397	59	-46	278	+*******	18	+*******	5	13	11	-7	-5	-32	-2	134	54	-12	-47	8	-50	-15	29	-64	19	45	-7	-107	326	33	133	16	-182	342	-21	2	11	109	33	-14	6	6
6.05	134	71	-296	-288	-391	362	159	90	398	58	-45	277	+*******	18	+*******	5	13	11	-7	-5	-31	-2	134	54	-12	-47	8	-49	-14	29	-63	22	43	-7	-106	327	33	133	18	-184	420	-21	2	14	105	34	-15	6	6
19.76	134	76	-293	-289	-388	361	159	90	396	58	-45	276	+*******	18	+*******	5	13	11	-7	-5	-31	-2	133	55	-13	-46	8	-50	-15	29	-63	24	42	-7	-107	326	33	132	20	-184	259	-21	6	24	104	31	-14	5	7
26.3	133	67	-294	-289	-385	360	158	89	399	57	-46	276	+*******	18	+*******	5	14	10	-8	-4	-31	-2	134	54	-12	-46	8	-50	-15	30	-63	25	44	-7	-108	326	33	132	19	-184	342	-20	8	14	104	32	-13	6	4
32.89	135	81	-296	-291	-381	360	158	89	399	58	-45	277	+*******	18	+*******	5	14	11	-7	-4	-31	0	135	54	-12	-46	8	-50	-15	30	-65	29	43	-8	-107	326	33	132	18	-183	448	-20	2	20	104	31	-13	6	7
46.66	134	76	-306	-294	-376	362	158	89	398	58	-45	279	+*******	19	+*******	4	14	10	-7	-5	-32	-2	136	54	-12	-46	7	-51	-16	30	-65	31	45	-9	-106	326	33	132	20	-182	419	-20	-3	13	103	33	-13	4	5
46.71	134	64	-311	-296	-373	361	158	89	398	59	-46	279	+*******	19	+*******	4	14	10	-7	-4	-32	-2	137	54	-12	-46	7	-52	-15	30	-67	29	45	-9	-107	326	33	131	19	-181	508	-20	1	13	102	33	-13	4	5
66.91	136	59	-329	-305	-369	363	159	88	398	59	-47	282	+*******	20	+*******	3	14	10	-7	-3	-32	0	139	53	-12	-45	7	-53	-16	29	-72	28	46	-10	-105	326	34	131	21	-178	372	-19	1	22	103	32	-14	3	5
87.16	139	96	-358	-328	-361	368	160	89	402	61	-47	286	+*******	21	+*******	1	14	10	-7	-2	-32	1	141	53	-12	-45	6	-56	-18	29	-76	39	46	-12	-104	326	34	130	22	-174	379	-17	3	23	114	30	-5	15	18
101.03	144	82	-396	-361	-357	371	159	89	401	63	-48	289	+*******	23	+*******	-1	15	10	-8	-1	-32	2	144	53	-11	-45	4	-59	-18	29	-81	44	49	-13	-103	326	35	129	23	-171	347	-15	16	24	105	30	-13	0	4
127.82	146	68	-440	-402	-349	376	160	88	401	64	-49	295	+*******	23	+*******	-4	15	10	-8	0	-33	3	147	53	-11	-45	3	-63	-21	29	-89	55	51	-16	-102	327	35	128	24	-165	326	-13	9	19	106	29	-7	1	9
174.85	152	75	-509	-465	-339	388	161	88	402	68	-51	303	+*******	28	+*******	-9	16	10	-9	3	-33	4	153	51	-10	-45	0	-71	-25	29	-105	58	51	-21	-97	327	36	126	28	-153	421	-6	16	14	105	29	-11	-6	4
263.25	166	69	-655	-571	-315	418	164	88	404	78	-58	321	+*******	32	+*******	-21	17	10	-10	7	-36	7	167	49	-10	-45	-4	-85	-31	29	-130	69	56	-28	-95	328	38	122	35	-136	455	3	21	20	107	27	-9	-10	4
343.49	181	59	-784	-644	-290	455	167	88	403	89	-65	338	+*******	38	+*******	-28	18	9	-10	9	-37	8	181	48	-11	-45	-7	-94	-34	29	-145	76	61	-32	-92	328	40	121	38	-124	373	9	13	22	111	26	-9	-16	3
391.23	191	18	-861	-687	-273	484	170	87	408	100	-72	354	+*******	40	+*******	-34	19	9	-10	11	-37	9	200	46	-11	-45	-10	-104	-38	30	-159	84	70	-37	-89	328	41	119	39	-110	237	16	15	20	103	24	-9	-19	4
478.93	205	57	-967	-740	-245	533	172	86	405	120	-84	379	+*******	44	+*******	-40	21	7	-11	12	-38	10	236	45	-12	-45	-13	-117	-43	29	-181	106	78	-43	-88	328	43	118	45	-90	455	27	10	10	119	23	-1	-25	7
607.12	238	30	-1127	-813	-191	621	176	86	402	166	-105	430	+*******	47	+*******	-46	23	5	-11	13	-36	11	300	44	-15	-45	-20	-134	-49	30	-206	145	92	-51	-87	327	44	116	50	-58	428	44	15	8	117	21	-7	-31	3
701.89	268	4	-1233	-866	-139	690	180	84	403	216	-123	485	+*******	51	+*******	-50	25	3	-9	12	-34	11	370	41	-17	-44	-25	-150	-55	31	-231	185	109	-58	-86	326	45	114	54	-16	449	68	20	10	114	18	-3	-38	6
796.77	309	-1	-1332	-914	-76	764	185	85	406	275	-141	555	+*******	55	+*******	-49	29	3	-9	11	-32	11	441	40	-19	-44	-27	-165	-60	32	-252	236	124	-63	-85	325	47	112	57	31	711	90	27	21	125	22	-4	-39	3
911.09	378	-38	-1424	-969	8	871	192	85	413	362	-162	670	+*******	64	+*******	-44	32	2	-9	15	-31	13	547	38	-18	-44	-32	-191	-69	39	-282	338	158	-73	-82	324	49	105	66	119	999	128	21	20	141	13	-5	-48	5
1100.03	527	-55	-1563	-1061	159	1078	208	92	432	518	-189	888	+*******	82	+*******	-33	40	3	-9	18	-28	14	695	34	-19	-44	-36	-224	-79	55	-323	474	201	-86	-79	321	50	96	73	261	982	178	24	14	177	10	-1	-56	10
1228.77	636	-104	-1652	-1127	260	1220	219	101	449	625	-204	1042	+*******	95	+*******	-24	46	4	-8	19	-24	15	784	32	-19	-44	-39	-247	-86	69	-349	556	233	-95	-78	320	51	90	78	368	1036	212	26	14	203	9	-7	-60	12
1330.13	719	-111	-1713	-1178	340	1330	229	110	457	707	-215	1156	+*******	107	+*******	-17	50	5	-9	21	-22	16	851	30	-19	-44	-40	-266	-91	79	-368	608	253	-101	-77	320	53	85	81	449	1334	239	18	26	228	9	-4	-64	13
1417.72	792	-131	-1765	-1222	412	1424	238	118	467	780	-223	1258	+*******	116	+*******	-11	54	5	-8	22	-18	15	906	29	-18	-44	-41	-281	-96	86	-386	674	270	-107	-76	320	53	83	84	523	1536	264	24	15	243	9	-5	-65	17
1497.42	864	-144	-1810	-1266	487	1521	245	126	475	853	-231	1366	+*******	128	+*******	-4	59	7	-8	24	-14	16	966	27	-18	-44	-42	-299	-100	97	-406	742	293	-115	-73	320	55	79	87	615	1653	297	14	25	261	5	-3	-67	15
1603.04	956	-168	-1863	-1318	586	1636	255	137	488	940	-241	1492	+*******	143	+*******	7	65	9	-8	26	-10	17	1030	25	-17	-44	-43	-319	-105	106	-427	809	314	-122	-73	320	56	76	91	700	1599	327	29	16	279	6	-2	-74	19
1660.77	999	-182	-1895	-1345	629	1689	260	142	494	978	-246	1538	+*******	148	+*******	9	67	10	-7	25	-8	17	1049	25	-18	-45	-44	-325	-107	109	-434	822	321	-123	-74	319	56	75	91	726	1280	334	10	15	289	7	-3	-77	21
1687.55	1022	-180	-1913	-1361	653	1719	262	145	501	1002	-248	1570	+*******	151	+*******	11	67	10	-8	25	-7	17	1064	24	-18	-44	-45	-329	-108	111	-439	835	328	-125	-72	319	57	75	92	753	1892	343	5	18	297	4	-2	-75	22
1694.09	1042	-189	-1920	-1368	672	1744	265	147	499	1018	-249	1593	+*******	156	+*******	13	69	11	-8	28	-6	18	1073	24	-17	-45	-44	-331	-108	113	-441	835	329	-126	-71	320	57	75	92	759	1872	339	16	24	299	5	-4	-76	19
1687.5	1043	-180	-1923	-1369	669	1745	264	147	498	1020	-249	1592	+*******	156	+*******	13	69	11	-8	27	-6	19	1073	24	-16	-45	-44	-331	-108	113	-441	849	323	-126	-72	320	57	75	91	760	1824	337	1	17	299	7	-5	-76	19
1696.52	1043	-189	-1927	-1372	668	1747	265	148	502	1024	-250	1596	+*******	156	+*******	13	69	11	-8	27	-6	18	1076	24	-17	-45	-44	-333	-109	113	-444	842	330	-126	-72	320	57	74	92	768	1786	343	14	17	302	4	-5	-77	20
1721.68	1055	-195	-1935	-1382	682	1763	266	150	503	1035	-250	1613	+*******	157	+*******	15	70	11	-7	27	-5	17	1082	24	-18	-45	-44	-336	-110	116	-447	855	336	-128	-71	319	57	74	93	781	1985	349	24	26	304	5	-6	-77	21
1741.88	1067	-186	-1944	-1391	698	1779	267	151	507	1047	-252	1630	+*******	159	+*******	15	71	11	-7	27	-5	18	1089	24	-17	-45	-45	-339	-111	118	-450	861	337	-128	-71	319	58	74	93	795	1825	355	18	19	307	3	-6	-77	22
1754.89	1080	-203	-1951	-1400	713	1797	269	153	506	1060	-254	1649	+*******	162	+*******	17	71	12	-7	27	-4	18	1097	23	-17	-45	-45	-342	-111	119	-453	867	343	-129	-71	318	58	73	94	810	1818	361	10	26	306	4	-4	-78	21
1775.14	1093	-207	-1960	-1408	730	1814	270	155	509	1072	-255	1667	+*******	164	+*******	18	72	12	-7	27	-3	18	1106	23	-18	-45	-46	-345	-112	121	-457	876	346	-130	-71	318	58	73	94	824	1995	367	14	23	309	4	-4	-80	22
1788.91	1107	-205	-1968	-1418	746	1832	271	156	513	1086	-258	1686	+*******	167	+*******	20	73	12	-7	27	-2	18	1114	23	-18	-45	-46	-348	-113	123	-460	889	349	-132	-71	318	58	72	94	839	1815	373	26	17	312	4	-4	-80	22
1809.22	1120	-216	-1976	-1427	765	1850	273	158	516	1103	-259	1724	+*******	176	+*******	23	75	12	-8	31	-1	20	1132	22	-14	-45	-45	-355	-114	130	-467	918	354	-134	-68	321	59	72	97	873	1982	389	55	28	313	5	-4	-81	23
1835.95	1155	-220	-1984	-1438	809	1891	276	161	521	1130	-261	1754	+*******	179	+*******	26	77	13	-7	31	0	20	1146	22	-16	-45	-46	-359	-116	132	-472	932	360	-136	-68	321	59	71	97	894	2292	397	36	27	319	3	-4	-82	23
1869.91	1182	-226	-2000	-1457	844	1928	278	165	524	1159	-265	1796	+*******	184	+*******	29	78	14	-7	31	2	20	1167	22	-15	-45	-47	-369	-118	139	-482	964	371	-140	-67	320	60	70	99	945	2161	421	36	16	326	4	-3	-83	23
1937.25	1232	-230	-2025	-1485	913	1996	283	171	534	1210	-270	1871	+*******	194	+*******	36	81	14	-7	32	5	20	1201	21	-15	-45	-47	-381	-121	147	-496	1007	385	-145	-65	319	60	68	101	1002	2236	443	35	28	335	4	-5	-86	24
2005.34	1283	-249	-2053	-1516	986	2066	288	177	542	1263	-275	1952	+*******	208	+*******	42	85	15	-7	34	8	21	1238	20	-14	-45	-48	-396	-126	157	-514	1059	399	-151	-61	319	62	66	102	1077	2407	473	24	29	345	5	-1	-90	25
2099.41	1358	-266	-2097	-1557	1099	2172	296	189	560	1339	-281	2056	+*******	224	+*******	50	89	16	-8	37	12	22	1282	18	-13	-46	-50	-414	-131	168	-536	1117	422	-159	-57	318	63	64	105	1164	2397	512	12	14	359	4	-2	-93	26
2187.81	1422	-281	-2135	-1590	1197	2264	303	201	578	1407	-286	2150	+*******	240	+*******	59	94	16	-8	39	15	22	1321	17	-13	-45	-51	-432	-135	177	-555	1177	438	-166	-54	318	63	63	107	1240	2543	543	41	24	378	3	-2	-97	28
2295.59	1495	-292	-2191	-1634	1314	2380	310	221	600	1492	-292	2262	+*******	258	+*******	68	99	18	-9	41	19	23	1365	15	-12	-46	-53	-452	-141	189	-580	1240	463	-176	-50	321	65	61	108	1333	2680	586	44	16	400	2	1	-102	30
2394.74	1570	-309	-2239	-1670	1424	2494	318	255	643	1574	-297	2376	+*******	279	+*******	76	106	19	-9	44	23	23	1408	14	-11	-46	-54	-471	-146	200	-603	1305	486	-184	-45	320	66	58	110	1420	2572	621	10	15	428	5	-1	-105	31
2477.9	1635	-308	-2283	-1698	1513	2601	326	320	690	1648	-300	2479	+*******	300	+*******	85	112	24	-10	48	26	24	1448	13	-10	-47	-56	-486	-150	211	-623	1381	512	-190	-40	320	67	57	112	1490	2865	650	7	28	475	4	1	-105	34
2546.05	1688	-304	-2319	-1721	1604	2645	334	433	749	1729	-314	2534	+*******	323	+*******	92	119	28	-10	48	30	25	1494	12	-10	-47	-56	-496	-153	216	-636	1441	539	-194	-37	326	67	56	113	1524	2859	662	25	14	543	8	-2	-107	36
2579.36	1713	-294	-2332	-1729	1749	2657	340	554	817	1818	-346	2522	+*******	341	+*******	95	126	29	-10	49	33	25	1510	12	-10	-47	-57	-501	-154	214	-642	1450	567	-195	-37	324	67	57	110	1526	2936	656	28	31	676	9	-2	-108	35
2585.84	1717	-289	-2339	-1729	1947	2654	344	626	873	1853	-364	2540	+*******	347	+*******	96	129	32	-10	48	34	24	1510	12	-11	-47	-57	-502	-152	211	-644	1454	581	-195	-37	323	66	57	112	1523	2802	656	34	17	758	9	-5	-107	38
2592.27	1721	-280	-2346	-1730	2154	2639	347	653	892	1884	-378	2553	+*******	353	+*******	97	132	34	-10	48	36	23	1509	13	-11	-47	-57	-501	-152	209	-644	1437	592	-195	-39	323	66	58	110	1517	2769	652	28	17	817	9	-3	-108	40
2585.84	1723	-229	-2374	-1719	2599	2638	357	652	920	1946	-395	2571	+*******	363	+*******	97	140	43	-10	46	39	22	1509	13	-12	-48	-56	-500	-150	200	-652	1404	620	-194	-41	322	65	60	107	1502	2953	658	9	19	972	8	-9	-104	39
2585.84	1724	-286	-2374	-1717	2640	2639	358	653	920	1951	-395	2572	+*******	364	+*******	97	140	43	-9	46	39	22	1510	13	-12	-47	-56	-500	-150	201	-653	1401	624	-193	-42	322	65	60	106	1501	2861	658	16	35	981	7	-5	-105	39
2585.84	1721	-282	-2376	-1718	2638	2641	357	653	919	1956	-396	2573	+*******	366	+*******	97	141	43	-10	46	39	22	1510	13	-12	-47	-57	-501	-149	201	-654	1402	627	-194	-41	323	65	60	106	1502	2887	656	13	19	990	6	-9	-104	40
2585.84	1724	-285	-2376	-1716	2656	2639	358	653	916	1960	-396	2573	+*******	366	+*******	97	141	43	-10	47	39	22	1511	13	-12	-47	-56	-500	-149	201	-653	1401	628	-194	-42	324	65	61	108	1498	2980	653	11	34	998	6	-8	-104	40
2579.31	1719	-288	-2375	-1713	2647	2634	358	650	917	1961	-396	2569	+*******	366	+*******	97	141	44	-9	46	39	22	1510	14	-13	-47	-56	-499	-149	200	-653	1393	623	-193	-43	326	65	61	106	1495	2902	652	9	20	1004	8	-8	-106	41
2572.02	1717	-289	-2375	-1710	2652	2631	358	648	906	1961	-396	2565	+*******	366	+*******	97	141	44	-10	46	40	22	1510	13	-13	-48	-55	-498	-149	199	-653	1399	627	-193	-43	327	65	60	106	1492	2860	650	10	20	1009	-29	-8	-106	40
2565.54	1715	-285	-2374	-1708	2664	2628	359	646	905	1962	-396	2562	+*******	364	+*******	97	141	46	-10	45	40	22	1509	14	-13	-48	-56	-498	-148	199	-653	1394	628	-192	-44	326	64	61	106	1489	2911	649	3	24	1015	6	-8	-104	43
2559.11	1713	-293	-2374	-1706	2681	2627	359	646	906	1962	-396	2561	+*******	363	+*******	97	141	46	-10	46	40	22	1509	14	-13	-48	-56	-497	-148	198	-653	1392	631	-192	-43	325	65	61	105	1487	2764	649	11	25	1017	7	-7	-105	40
2551.88	1712	-282	-2374	-1705	2683	2624	359	644	907	1962	-395	2559	+*******	364	+*******	96	142	47	-9	45	40	22	1508	14	-13	-47	-56	-497	-148	197	-653	1394	628	-192	-43	325	65	60	107	1485	2882	648	-6	25	1024	7	-8	-105	42
2551.88	1712	-285	-2375	-1704	2686	2622	359	645	902	1963	-395	2558	+*******	364	+*******	96	142	47	-9	45	40	22	1508	13	-13	-47	-55	-496	-148	197	-652	1389	629	-192	-44	325	64	60	106	1484	2889	647	0	24	1024	8	-7	-103	41
2545.29	1711	-287	-2375	-1702	2686	2620	359	644	903	1963	-395	2557	+*******	363	+*******	96	142	47	-9	45	40	22	1508	14	-14	-47	-55	-495	-148	196	-652	1387	629	-192	-43	324	64	61	106	1482	2896	647	12	37	1028	11	-10	-102	40
2545.24	1709	-287	-2376	-1702	2684	2617	359	645	901	1963	-395	2556	+*******	363	+*******	96	142	47	-9	45	40	22	1508	14	-13	-48	-55	-495	-148	196	-652	1391	629	-191	-44	324	64	61	105	1481	2919	646	8	23	1031	7	-10	-102	41
2538.81	1709	-285	-2376	-1700	2684	2616	360	645	901	1963	-394	2554	+*******	363	+*******	96	142	48	-9	45	40	22	1507	14	-14	-47	-55	-494	-147	196	-652	1389	628	-191	-44	324	64	60	106	1480	2810	646	-13	38	1033	8	-8	-102	42
2531.57	1708	-283	-2376	-1700	2682	2614	360	645	898	1964	-394	2555	+*******	363	+*******	96	142	48	-9	45	40	22	1507	14	-13	-47	-55	-494	-147	196	-652	1387	629	-191	-44	323	64	60	106	1478	2854	645	-2	23	1037	9	-10	-103	42
2531.57	1708	-287	-2376	-1697	2679	2613	360	646	895	1964	-394	2554	+*******	363	+*******	96	143	48	-9	45	40	22	1507	14	-13	-47	-55	-494	-147	195	-652	1385	627	-191	-44	324	65	61	107	1477	2838	645	1	24	1037	8	-9	-102	41
2524.99	1706	-289	-2377	-1697	2675	2613	360	645	890	1964	-394	2553	+*******	363	+*******	96	143	48	-9	45	40	22	1506	14	-14	-47	-55	-494	-147	195	-652	1385	630	-191	-44	323	64	61	108	1476	2856	645	4	25	1040	7	-9	-103	39
2524.99	1706	-287	-2377	-1696	2672	2611	362	645	895	1965	-394	2552	+*******	363	+*******	96	143	48	-9	45	40	22	1506	14	-14	-47	-55	-494	-147	195	-652	1388	624	-190	-44	322	65	60	105	1474	2890	645	3	26	1045	8	-7	-102	40
2524.99	1705	-282	-2378	-1695	2669	2611	362	650	899	1966	-394	2551	+*******	363	+*******	96	143	49	-9	45	40	22	1505	14	-14	-47	-55	-493	-147	195	-651	1382	627	-190	-44	322	65	61	106	1473	2843	645	11	26	1047	7	-10	-101	43
2538.81	1704	-287	-2378	-1694	2664	2610	362	650	902	1966	-394	2551	+*******	363	+*******	96	144	49	-9	45	40	22	1505	14	-14	-47	-55	-493	-147	194	-652	1378	632	-190	-44	321	65	61	106	1472	2811	644	2	26	1047	8	-7	-102	42
2559.06	1705	-291	-2381	-1696	2660	2613	362	650	900	1969	-394	2552	+*******	363	+*******	96	144	49	-9	45	40	22	1506	14	-14	-47	-55	-494	-147	194	-653	1382	630	-190	-45	320	65	60	107	1473	2881	646	8	26	1052	7	-8	-102	42
2559.11	1706	-284	-2382	-1696	2661	2615	362	652	897	1972	-394	2555	+*******	364	+*******	96	144	49	-9	45	40	22	1506	14	-14	-47	-55	-494	-147	194	-654	1383	630	-191	-44	320	65	60	106	1474	2874	647	3	25	1057	5	-7	-100	42
2565.54	1712	-288	-2385	-1698	2667	2623	363	656	899	1979	-393	2564	+*******	367	+*******	97	146	50	-9	46	41	23	1507	14	-13	-47	-55	-496	-148	195	-655	1382	630	-191	-45	319	64	61	104	1480	2855	650	12	33	1061	10	-8	-100	42
2572.02	1716	-289	-2388	-1702	2676	2629	363	661	905	1986	-393	2571	+*******	369	+*******	98	146	50	-9	46	41	22	1509	14	-13	-47	-55	-497	-148	196	-657	1386	634	-192	-44	318	65	60	106	1482	2846	653	2	26	1067	8	-8	-102	42
2579.36	1719	-298	-2391	-1704	2688	2633	364	666	911	1994	-393	2576	+*******	371	+*******	97	146	50	-9	46	41	22	1510	14	-13	-47	-56	-498	-148	195	-658	1389	635	-192	-44	319	64	60	105	1485	2911	656	7	25	1074	8	-6	-101	41
2592.32	1727	-293	-2394	-1706	2714	2640	365	672	916	2006	-393	2584	+*******	374	+*******	99	148	50	-9	46	41	23	1512	14	-13	-47	-56	-500	-149	197	-661	1393	639	-194	-44	319	65	60	106	1491	2907	660	5	25	1084	7	-11	-105	44
2599.67	1732	-290	-2397	-1708	2742	2646	366	678	917	2020	-393	2595	+*******	378	+*******	100	150	50	-9	47	41	23	1514	14	-13	-47	-56	-503	-149	197	-664	1401	644	-194	-45	319	65	61	105	1499	2887	664	6	26	1093	8	-7	-99	44
2612.57	1742	-286	-2399	-1713	2760	2656	367	688	928	2042	-394	2611	+*******	388	+*******	102	155	49	-9	47	41	23	1519	14	-12	-47	-57	-505	-150	199	-667	1405	653	-195	-43	321	65	61	105	1507	2903	664	-13	26	1112	10	-5	-101	43
2626.4	1749	-296	-2398	-1715	2781	2666	367	694	937	2067	-396	2617	+*******	398	+*******	104	158	48	-10	47	42	22	1524	13	-12	-48	-56	-508	-150	200	-670	1410	664	-196	-43	325	64	62	105	1509	2916	663	-1	26	1138	10	-11	-101	46
2632.82	1753	-294	-2396	-1717	2778	2670	368	696	936	2089	-396	2621	+*******	406	+*******	106	162	48	-10	47	42	22	1526	13	-12	-48	-57	-509	-150	199	-672	1413	672	-197	-44	323	64	63	105	1510	2888	662	2	38	1165	7	-7	-99	46
2632.82	1753	-297	-2391	-1716	2712	2665	368	699	941	2111	-394	2621	+*******	414	+*******	107	164	49	-9	47	43	22	1528	13	-12	-47	-56	-509	-150	198	-673	1411	683	-196	-45	319	64	63	105	1507	3058	660	-3	23	1196	8	-6	-99	45
2632.82	1748	-295	-2388	-1712	2359	2659	369	701	946	2126	-392	2629	+*******	418	+*******	107	167	51	-10	46	43	22	1528	13	-13	-48	-56	-510	-150	198	-675	1412	695	-197	-45	317	64	63	104	1506	2886	660	-8	29	1220	12	-9	-97	48
2640.06	1749	-293	-2388	-1711	2302	2658	370	704	949	2140	-391	2636	+*******	422	+*******	108	169	53	-9	47	43	21	1529	13	-12	-48	-56	-509	-150	197	-676	1411	705	-197	-45	318	63	64	103	1507	2906	661	1	30	1240	9	-6	-96	48
2640.11	1747	-293	-2388	-1709	2261	2661	371	707	957	2155	-391	2643	+*******	425	+*******	109	170	53	-10	46	43	22	1529	13	-12	-48	-56	-510	-150	197	-678	1412	714	-197	-45	323	63	65	103	1507	2948	663	-12	28	1260	11	-7	-97	48
2646.7	1746	-300	-2388	-1706	2028	2670	377	718	975	2193	-390	2659	+*******	432	+*******	111	174	53	-10	46	44	21	1530	13	-13	-47	-57	-511	-150	196	-681	1416	733	-198	-45	321	63	66	103	1509	2903	666	-7	28	1309	7	-8	-94	51
2653.13	1746	-300	-2387	-1707	1959	2674	381	725	987	2213	-392	2668	+*******	436	+*******	112	176	54	-10	46	44	21	1530	13	-13	-47	-57	-512	-150	195	-684	1416	737	-198	-45	320	63	68	104	1511	3162	668	-3	25	1335	8	-7	-93	49
2653.13	1744	-306	-2386	-1705	1926	2673	387	727	996	2227	-392	2678	+*******	439	+*******	114	177	55	-10	46	45	21	1531	13	-13	-48	-57	-512	-150	195	-685	1414	741	-198	-46	319	63	70	103	1509	2946	667	-6	26	1355	8	-7	-95	51
2640.06	1736	-305	-2382	-1694	1868	2654	391	722	995	2231	-393	2674	+*******	438	+*******	114	178	56	-9	45	45	20	1529	13	-13	-48	-56	-510	-149	193	-683	1414	739	-197	-47	317	62	71	102	1502	2924	663	-8	28	1374	10	-6	-90	50
2632.88	1730	-297	-2380	-1687	1842	2649	392	720	994	2232	-393	2672	+*******	437	+*******	114	179	56	-9	45	44	20	1529	13	-13	-48	-56	-509	-149	191	-683	1413	738	-196	-47	316	62	72	103	1499	2936	662	-4	25	1383	9	-7	-90	50
2632.82	1728	-297	-2381	-1682	1814	2645	395	719	994	2234	-392	2671	+*******	436	+*******	113	179	56	-9	45	45	20	1528	13	-13	-48	-56	-508	-148	191	-683	1411	739	-196	-49	315	62	72	102	1495	2950	661	0	39	1388	11	-6	-91	52
2626.4	1725	-299	-2382	-1679	1798	2643	396	719	998	2235	-391	2670	+*******	436	+*******	113	179	57	-9	45	45	20	1528	13	-13	-48	-56	-507	-149	190	-683	1408	736	-196	-49	314	62	73	102	1494	2921	661	1	41	1392	10	-7	-93	50
2626.4	1720	-302	-2383	-1676	1780	2639	396	718	994	2235	-391	2668	+*******	435	+*******	112	180	57	-10	45	45	20	1527	13	-13	-48	-56	-506	-148	190	-682	1409	738	-195	-49	313	62	73	102	1491	2925	661	-5	26	1395	8	-6	-89	50
2626.34	1718	-296	-2383	-1673	1760	2638	397	718	992	2237	-390	2671	+*******	435	+*******	112	180	57	-9	45	45	20	1527	13	-14	-47	-56	-506	-148	189	-682	1407	738	-195	-50	313	62	73	102	1490	2936	660	-3	27	1400	10	-5	-92	52
2626.4	1716	-302	-2384	-1671	1740	2636	398	718	993	2238	-390	2674	+*******	434	+*******	111	181	58	-9	44	45	20	1526	13	-14	-48	-56	-505	-147	189	-682	1405	736	-195	-49	311	62	74	102	1489	2908	660	11	26	1401	9	-6	-90	52
2626.34	1717	-289	-2385	-1669	1725	2637	399	719	994	2240	-389	2677	+*******	434	+*******	111	181	58	-9	44	45	20	1526	13	-14	-47	-55	-506	-147	188	-683	1401	735	-195	-50	311	62	73	100	1489	2877	661	4	39	1407	9	-8	-89	49
2626.34	1716	-301	-2387	-1668	1704	2639	400	723	998	2244	-389	2680	+*******	434	+*******	111	182	58	-9	44	45	20	1526	13	-14	-47	-56	-505	-147	188	-684	1406	738	-195	-49	312	62	74	102	1489	2935	662	-2	24	1410	9	-7	-89	51
2626.4	1715	-304	-2390	-1668	1695	2641	400	726	1002	2249	-388	2685	+*******	434	+*******	111	181	58	-9	44	45	20	1527	14	-14	-47	-56	-506	-147	188	-684	1411	740	-195	-50	312	62	74	101	1490	2880	664	1	27	1416	8	-7	-91	51
2632.82	1717	-305	-2392	-1668	1688	2645	401	731	1007	2255	-388	2692	+*******	435	+*******	111	182	59	-10	45	45	20	1527	13	-14	-47	-56	-506	-148	188	-685	1406	740	-195	-51	312	62	75	102	1491	2871	665	0	38	1423	9	-7	-89	51
2632.88	1719	-308	-2394	-1668	1685	2649	402	734	1013	2260	-388	2697	+*******	436	+*******	111	183	59	-9	45	46	20	1528	13	-13	-47	-55	-506	-148	189	-685	1410	741	-195	-50	312	62	74	102	1493	2945	666	-6	39	1426	8	-8	-87	52
2640.06	1723	-308	-2398	-1669	1683	2654	403	739	1018	2271	-388	2706	+*******	437	+*******	112	184	59	-10	45	46	20	1528	13	-14	-47	-56	-508	-147	189	-687	1411	743	-196	-50	312	62	75	101	1495	2912	668	3	24	1435	10	-4	-89	52
2640.06	1725	-310	-2399	-1668	1688	2655	404	741	1022	2278	-387	2712	+*******	437	+*******	112	185	60	-9	45	45	20	1529	13	-13	-47	-56	-507	-147	189	-688	1411	743	-196	-50	311	63	75	102	1495	2959	670	-3	22	1443	7	-6	-88	50
2632.82	1720	-311	-2401	-1664	1686	2651	405	736	1023	2280	-387	2712	+*******	437	+*******	111	185	60	-9	45	46	20	1529	13	-14	-47	-56	-507	-147	188	-687	1407	745	-195	-49	311	62	76	102	1492	2959	668	2	28	1446	7	-5	-88	52
2632.82	1717	-299	-2401	-1661	1682	2649	405	734	1022	2281	-387	2711	+*******	436	+*******	112	185	60	-9	44	46	20	1529	13	-14	-48	-56	-506	-147	187	-687	1406	745	-195	-49	310	62	76	102	1490	2922	667	3	27	1457	10	-4	-88	51
2626.34	1716	-304	-2401	-1658	1674	2647	406	732	1023	2281	-386	2710	+*******	436	+*******	111	186	60	-9	44	46	20	1528	14	-14	-47	-56	-505	-147	187	-687	1407	745	-195	-49	310	62	76	101	1488	2938	666	2	30	1455	10	-7	-87	52
2619.81	1713	-299	-2402	-1657	1666	2646	406	731	1023	2281	-386	2709	+*******	435	+*******	111	185	60	-10	44	46	20	1527	14	-14	-48	-55	-505	-147	187	-687	1407	744	-195	-50	309	62	76	102	1486	2909	665	9	29	1457	7	-6	-87	52
2619.81	1710	-306	-2402	-1655	1661	2644	407	730	1026	2281	-386	2710	+*******	435	+*******	111	186	61	-9	44	46	19	1527	13	-14	-48	-55	-505	-147	186	-687	1403	744	-195	-51	309	62	76	101	1485	2921	664	5	27	1457	8	-8	-87	51
2612.52	1709	-305	-2402	-1654	1654	2643	408	728	1025	2280	-386	2710	+*******	435	+*******	111	186	61	-9	44	46	19	1527	14	-14	-47	-56	-504	-146	186	-686	1402	744	-194	-50	309	62	77	101	1484	2917	664	3	40	1458	8	-6	-86	50
2612.52	1707	-307	-2403	-1652	1647	2642	408	728	1025	2280	-386	2709	+*******	435	+*******	110	186	61	-9	44	46	20	1527	13	-14	-48	-55	-504	-146	185	-686	1406	743	-194	-52	310	62	77	101	1482	2929	664	4	27	1460	10	-7	-86	52
2606.09	1706	-304	-2404	-1651	1640	2641	409	727	1025	2280	-385	2709	+*******	434	+*******	110	186	61	-9	44	46	20	1527	13	-14	-48	-55	-504	-146	185	-686	1402	744	-194	-51	309	62	77	101	1481	2932	664	2	27	1463	6	-9	-87	53
2606.09	1704	-311	-2404	-1650	1634	2640	409	726	1026	2280	-385	2708	+*******	434	+*******	110	186	62	-10	42	46	19	1526	14	-14	-47	-55	-503	-146	185	-686	1400	743	-194	-51	309	62	77	101	1480	2935	664	3	30	1460	8	-8	-87	54
2592.32	1700	-302	-2406	-1646	1614	2638	410	725	1024	2280	-386	2706	+*******	433	+*******	109	187	62	-9	42	46	20	1525	13	-15	-48	-55	-502	-145	183	-686	1402	743	-194	-51	309	62	77	102	1477	2935	664	2	23	1467	6	-8	-84	51
2592.27	1699	-310	-2406	-1646	1604	2637	411	725	1023	2280	-385	2705	+*******	433	+*******	109	187	62	-10	42	46	19	1526	13	-15	-48	-55	-502	-145	183	-686	1399	743	-194	-51	308	62	77	102	1476	2932	663	1	25	1466	8	-8	-86	51
2599.56	1699	-309	-2406	-1644	1599	2637	412	725	1023	2280	-385	2705	+*******	433	+*******	109	187	63	-9	44	46	20	1525	14	-15	-48	-55	-502	-145	184	-686	1397	743	-193	-50	308	62	78	102	1476	2957	664	2	39	1468	8	-8	-86	52
2612.52	1697	-310	-2408	-1645	1591	2637	412	726	1024	2281	-385	2705	+*******	432	+*******	107	187	62	-9	42	46	19	1525	14	-15	-48	-55	-502	-145	183	-686	1400	742	-193	-51	309	62	77	102	1476	2897	664	3	26	1469	8	-7	-86	51
2626.4	1700	-310	-2413	-1648	1585	2644	414	735	1029	2287	-384	2712	+*******	433	+*******	107	185	63	-10	42	46	19	1526	14	-13	-47	-54	-505	-146	188	-690	1408	745	-195	-49	311	63	78	104	1489	2949	671	2	25	1472	6	-8	-85	51
2626.4	1719	-310	-2411	-1646	1596	2665	416	748	1039	2304	-382	2734	+*******	443	+*******	109	188	63	-11	47	46	21	1530	13	-12	-48	-55	-506	-146	188	-692	1408	747	-196	-47	310	63	78	103	1491	2957	679	-6	27	1484	6	-7	-85	52
2632.82	1720	-312	-2414	-1650	1619	2670	417	755	1046	2314	-382	2742	+*******	444	+*******	109	188	63	-10	46	46	21	1531	13	-12	-48	-55	-507	-147	188	-693	1409	754	-196	-50	307	63	78	103	1493	2873	677	3	28	1491	8	-6	-86	51
2646.59	1720	-312	-2419	-1652	1637	2675	419	762	1052	2325	-381	2750	+*******	446	+*******	110	189	63	-10	46	46	20	1532	13	-13	-48	-56	-509	-147	188	-695	1412	755	-197	-49	306	63	79	102	1495	2958	677	0	26	1500	7	-5	-85	53
2653.07	1723	-314	-2421	-1654	1660	2680	420	767	1059	2334	-380	2759	+*******	447	+*******	111	190	63	-11	46	47	20	1534	13	-13	-48	-56	-510	-148	187	-697	1413	759	-197	-50	305	63	79	103	1496	2963	679	3	30	1508	8	-7	-88	52
2660.26	1724	-316	-2423	-1655	1680	2685	422	772	1068	2345	-378	2768	+*******	449	+*******	112	192	64	-10	46	47	20	1535	13	-13	-47	-56	-511	-148	187	-698	1414	764	-198	-47	305	63	80	103	1498	2965	675	0	40	1516	9	-8	-85	53
2666.84	1725	-316	-2425	-1655	1714	2692	423	775	1078	2355	-375	2777	+*******	451	+*******	113	193	64	-10	46	47	20	1537	13	-13	-48	-56	-512	-148	187	-699	1409	771	-198	-49	305	63	82	102	1499	2955	675	3	24	1526	8	-8	-86	53
2673.38	1724	-316	-2424	-1655	1763	2693	424	777	1087	2365	-370	2783	+*******	453	+*******	114	194	64	-10	46	47	20	1538	13	-13	-48	-57	-513	-148	187	-701	1416	775	-199	-51	305	63	83	101	1499	2961	674	4	26	1536	10	-9	-83	56
2680.56	1724	-316	-2426	-1654	1796	2692	426	781	1095	2376	-367	2794	+*******	454	+*******	114	194	64	-10	46	47	20	1540	12	-13	-47	-57	-514	-148	187	-702	1416	782	-199	-50	305	63	85	101	1501	2915	674	18	26	1548	10	-6	-84	55
2680.61	1725	-315	-2424	-1652	1837	2693	428	784	1103	2388	-364	2803	+*******	456	+*******	115	196	64	-10	46	47	20	1541	12	-12	-48	-57	-515	-149	187	-704	1422	786	-199	-50	306	62	87	101	1502	2963	674	12	39	1560	9	-7	-83	55
2687.15	1723	-319	-2425	-1651	1873	2698	430	787	1113	2398	-363	2807	+*******	457	+*******	115	196	64	-10	46	47	20	1543	12	-13	-48	-57	-516	-149	187	-705	1419	792	-200	-49	306	63	89	101	1503	2928	674	21	27	1570	8	-5	-82	54
2693.74	1720	-317	-2423	-1648	1922	2706	434	794	1121	2415	-360	2819	+*******	460	+*******	115	197	64	-10	45	48	20	1544	12	-13	-48	-57	-518	-149	187	-707	1424	801	-200	-50	304	62	91	101	1504	2943	674	26	27	1586	10	-8	-82	56
2700.86	1721	-313	-2424	-1646	1956	2709	436	799	1129	2427	-359	2830	+*******	461	+*******	116	199	64	-10	46	48	19	1545	12	-13	-48	-57	-519	-149	187	-709	1423	808	-201	-50	304	63	93	101	1507	3036	675	26	26	1601	10	-7	-83	54
2707.34	1724	-315	-2421	-1643	2008	2712	439	809	1146	2450	-353	2852	+*******	466	+*******	117	201	64	-11	45	48	19	1546	12	-13	-48	-57	-521	-149	186	-713	1428	817	-201	-49	304	62	96	101	1508	2958	671	24	29	1623	7	-6	-80	54
2707.34	1718	-324	-2418	-1637	2022	2707	443	812	1157	2463	-351	2865	+*******	468	+*******	117	203	65	-10	45	48	19	1546	12	-13	-48	-57	-521	-149	186	-713	1426	823	-201	-49	303	62	98	100	1505	2958	669	39	25	1636	7	-6	-79	56
2700.92	1710	-320	-2417	-1630	2019	2704	444	810	1161	2466	-350	2871	+*******	467	+*******	116	203	66	-10	45	48	18	1545	12	-14	-48	-57	-519	-148	184	-713	1423	827	-200	-49	301	62	99	100	1502	2969	667	36	26	1646	7	-6	-79	55
2700.86	1703	-322	-2417	-1625	2011	2707	447	814	1165	2474	-348	2881	+*******	467	+*******	116	204	67	-10	44	48	18	1545	12	-13	-48	-57	-519	-148	184	-713	1423	830	-200	-47	301	62	100	100	1500	2930	668	55	23	1656	11	-6	-77	59
2693.68	1700	-320	-2417	-1619	2003	2706	448	814	1170	2476	-347	2884	+*******	467	+*******	116	205	68	-10	44	48	18	1545	13	-14	-48	-57	-518	-147	182	-713	1421	831	-200	-47	302	61	100	99	1496	2995	666	51	23	1664	8	-7	-76	55
2687.15	1694	-320	-2415	-1615	1994	2702	450	813	1171	2477	-346	2887	+*******	466	+*******	116	205	69	-10	44	48	18	1544	12	-14	-48	-57	-516	-147	181	-713	1419	829	-199	-49	303	62	101	99	1494	2961	665	44	22	1668	6	-6	-74	55
2687.15	1690	-322	-2417	-1612	1979	2701	452	814	1172	2478	-346	2888	+*******	466	+*******	116	205	69	-10	42	48	18	1543	13	-14	-47	-56	-515	-147	181	-713	1421	828	-198	-50	302	61	101	99	1492	2962	665	45	34	1671	7	-4	-74	57
2687.09	1687	-329	-2419	-1608	1969	2699	455	814	1177	2479	-345	2891	+*******	464	+*******	115	207	70	-10	44	49	18	1543	13	-14	-48	-56	-515	-147	180	-713	1418	827	-199	-51	302	61	102	99	1491	3039	665	53	23	1673	6	-4	-76	57
2687.09	1686	-322	-2420	-1607	1961	2699	455	818	1176	2482	-345	2896	+*******	464	+*******	115	207	71	-10	42	49	18	1543	12	-14	-48	-56	-515	-146	180	-713	1414	828	-198	-51	302	61	103	98	1490	2898	666	70	24	1678	5	-5	-75	56
2687.09	1683	-322	-2423	-1604	1953	2701	458	825	1185	2488	-344	3051	+*******	464	+*******	114	206	71	-10	42	48	17	1543	12	-15	-48	-57	-515	-146	179	-714	1418	826	-199	-51	302	61	103	98	1490	2937	667	69	25	1685	7	-6	-74	58
2687.09	1683	-330	-2425	-1603	1952	2704	460	833	1185	2493	-343	3088	+*******	466	+*******	114	208	71	-10	42	49	18	1543	13	-15	-48	-56	-515	-147	180	-715	1418	831	-199	-52	301	61	103	98	1491	2915	668	58	23	1690	7	-6	-71	55
2687.09	1684	-324	-2428	-1601	1954	2709	461	839	1193	2500	-343	3114	+*******	467	+*******	114	209	72	-10	42	49	17	1543	12	-14	-48	-56	-516	-147	179	-716	1418	832	-200	-52	301	60	103	98	1492	2927	669	57	24	1700	5	-5	-71	56
2693.63	1685	-334	-2430	-1601	1958	2713	463	845	1201	2508	-342	3145	+*******	468	+*******	115	209	73	-10	42	49	18	1544	12	-14	-48	-56	-516	-146	179	-717	1415	834	-200	-52	301	60	104	98	1493	2971	670	58	23	1704	6	-5	-72	59
2693.63	1686	-327	-2433	-1600	1968	2717	465	850	1209	2517	-341	3174	+*******	469	+*******	115	209	73	-10	44	49	17	1545	12	-15	-48	-57	-518	-147	179	-718	1421	837	-200	-51	301	61	105	97	1494	2949	672	43	21	1714	4	-5	-70	58
2700.86	1687	-330	-2433	-1598	1976	2719	468	855	1215	2525	-341	3204	+*******	470	+*******	115	211	73	-10	44	49	18	1545	12	-14	-48	-56	-518	-147	179	-719	1420	843	-200	-50	301	61	106	99	1496	2933	678	48	23	1722	7	-4	-69	58
2700.86	1690	-331	-2436	-1597	1992	2722	470	863	1224	2537	-340	3248	+*******	472	+*******	116	212	75	-10	44	49	18	1546	12	-14	-48	-56	-519	-147	179	-721	1422	843	-200	-50	301	60	107	98	1497	2974	680	51	24	1734	5	-6	-69	60
2707.34	1689	-340	-2439	-1591	2043	2726	476	878	1241	2557	-339	3346	+*******	473	+*******	117	213	75	-10	44	49	18	1546	12	-14	-48	-56	-520	-147	179	-723	1426	851	-200	-51	300	60	111	98	1496	2959	678	68	25	1751	5	-1	-64	61
2700.86	1686	-336	-2436	-1586	2049	2718	477	882	1243	2559	-338	3367	+*******	473	+*******	117	214	75	-10	44	49	18	1546	12	-14	-48	-56	-519	-147	178	-722	1419	852	-200	-51	300	60	112	98	1494	2958	676	56	37	1756	6	-2	-68	61
2693.68	1682	-338	-2436	-1582	2045	2711	479	884	1245	2560	-338	3381	+*******	472	+*******	117	213	75	-10	42	49	17	1545	12	-14	-48	-56	-516	-146	177	-722	1422	851	-199	-52	301	60	113	97	1491	2949	676	59	19	1761	7	-3	-63	58
2687.15	1678	-340	-2436	-1579	2039	2706	480	883	1249	2560	-338	3388	+*******	471	+*******	116	214	76	-10	42	49	17	1545	12	-14	-48	-56	-516	-146	176	-721	1420	851	-199	-52	301	60	113	97	1489	2933	675	68	38	1763	7	-1	-62	59
2687.09	1675	-338	-2437	-1576	2029	2701	481	886	1252	2561	-338	3399	+*******	470	+*******	116	214	76	-10	42	49	17	1544	12	-15	-48	-56	-515	-146	176	-722	1420	850	-199	-51	300	60	113	97	1488	2961	675	59	23	1766	6	-3	-62	59
2693.68	1674	-340	-2439	-1575	2023	2702	483	894	1257	2565	-337	3411	+*******	470	+*******	116	214	76	-10	42	49	17	1544	12	-15	-48	-56	-516	-146	175	-722	1421	850	-199	-52	299	60	114	96	1489	2919	676	60	26	1772	5	-1	-60	58
2693.68	1675	-343	-2441	-1574	2024	2708	485	907	1264	2573	-336	3429	+*******	471	+*******	116	215	76	-10	42	49	17	1544	12	-15	-48	-56	-518	-146	176	-724	1421	853	-200	-52	298	60	114	96	1492	2971	679	56	23	1776	4	0	-62	57
2700.86	1680	-347	-2443	-1572	2035	2716	487	916	1275	2583	-334	3453	+*******	473	+*******	116	216	76	-10	42	49	17	1545	12	-15	-48	-56	-518	-146	176	-726	1425	855	-200	-53	297	60	115	97	1495	2930	682	62	25	1787	4	-2	-61	58
2707.34	1682	-351	-2444	-1571	2047	2721	489	925	1285	2595	-333	3480	+*******	475	+*******	117	217	76	-10	44	50	17	1546	12	-14	-48	-56	-520	-147	177	-728	1427	858	-200	-52	297	60	115	97	1499	2882	686	74	26	1793	5	-1	-60	59
2713.93	1687	-359	-2447	-1571	2075	2727	491	938	1295	2611	-331	3530	+*******	477	+*******	118	218	77	-11	44	50	18	1547	12	-14	-48	-57	-521	-147	176	-730	1431	864	-201	-53	300	60	116	97	1502	2911	687	75	25	1806	5	0	-59	61
2721.22	1690	-356	-2449	-1568	2084	2727	494	949	1308	2628	-329	3608	+*******	480	+*******	119	219	77	-10	44	50	17	1549	11	-14	-48	-57	-522	-147	177	-732	1436	869	-201	-52	300	60	116	97	1505	2995	689	77	27	1826	4	1	-58	61
2734.18	1694	-359	-2450	-1563	2084	2721	502	975	1330	2653	-322	3758	+*******	482	+*******	119	220	77	-11	44	51	17	1550	12	-14	-48	-57	-523	-147	177	-735	1441	876	-202	-52	305	60	115	97	1507	2975	692	101	25	1851	2	1	-57	61
2734.24	1693	-374	-2450	-1560	2096	2720	505	990	1341	2670	-319	3853	+*******	483	+*******	120	222	77	-11	44	51	17	1550	12	-14	-48	-57	-524	-147	176	-737	1440	882	-202	-52	306	60	115	97	1508	2994	693	97	28	1864	1	3	-54	62
2734.18	1695	-369	-2449	-1556	2112	2722	509	1006	1354	2692	-315	3928	+*******	486	+*******	121	223	77	-11	44	51	17	1550	12	-14	-48	-57	-524	-147	176	-739	1440	891	-202	-52	307	60	114	96	1508	2926	694	117	35	1882	2	4	-54	62
2741.53	1693	-374	-2450	-1553	2124	2725	513	1026	1370	2713	-312	3992	+*******	490	+*******	121	224	78	-11	42	51	17	1551	11	-14	-48	-52	-524	-147	175	-741	1436	898	-202	-52	307	60	113	95	1509	2946	695	136	34	1897	0	3	-51	62
2741.47	1692	-381	-2450	-1549	2135	2728	517	1049	1385	2730	-307	4053	+*******	496	+*******	121	225	79	-11	42	52	16	1551	12	-14	-48	-57	-524	-147	175	-742	1442	906	-203	-52	307	60	111	95	1509	2995	696	122	27	1914	-1	5	-48	61
2747.9	1692	-373	-2451	-1542	2137	2729	521	1082	1401	2749	-303	4082	+*******	509	+*******	121	228	80	-11	42	52	16	1551	11	-14	-48	-57	-523	-147	174	-745	1447	915	-202	-52	307	59	109	94	1509	2934	696	158	40	1936	-2	6	-43	62
2747.95	1692	-379	-2451	-1534	2137	2730	527	1099	1423	2765	-299	4155	+*******	518	+*******	121	230	80	-11	42	52	16	1552	11	-14	-48	-56	-523	-146	174	-747	1447	922	-202	-51	307	60	106	96	1510	2989	697	149	37	1955	-3	9	-42	62
2754.38	1693	-374	-2453	-1527	2135	2734	533	1131	1445	2784	-295	4247	+*******	525	+*******	121	232	81	-11	42	52	16	1552	11	-14	-48	-56	-523	-146	173	-750	1449	929	-202	-51	308	60	104	95	1511	3008	699	158	28	1980	-2	7	-41	61
2754.43	1695	-384	-2454	-1521	2140	2738	538	1155	1468	2801	-292	4327	+*******	530	+*******	122	234	82	-11	42	54	16	1553	12	-14	-48	-56	-523	-145	173	-753	1452	935	-202	-52	305	59	101	95	1511	2991	701	176	46	1999	-5	8	-37	62
2754.32	1696	-380	-2451	-1513	2153	2741	545	1197	1491	2832	-289	4424	+*******	536	+*******	120	236	83	-11	42	54	16	1553	11	-14	-48	-56	-522	-145	172	-757	1453	942	-202	-53	305	59	98	94	1511	2882	703	210	27	2026	-4	10	-36	60
2754.38	1696	-378	-2456	-1506	2163	2735	553	1246	1517	2861	-285	4516	+*******	542	+*******	121	238	84	-11	42	54	16	1553	11	-14	-48	-56	-521	-144	172	-760	1455	950	-202	-53	305	59	95	93	1510	2932	708	224	44	2055	-7	7	-31	62
2754.38	1694	-384	-2459	-1499	2170	2724	562	1318	1542	2889	-281	4642	+*******	547	+*******	122	241	84	-11	41	54	16	1553	11	-14	-48	-55	-519	-143	170	-764	1453	961	-201	-55	308	58	91	93	1510	2906	711	254	38	2085	-8	4	-28	62
2754.38	1690	-384	-2463	-1493	2170	2713	572	1411	1571	2922	-277	4796	+*******	550	+*******	126	245	86	-11	40	55	15	1553	12	-14	-48	-54	-516	-143	168	-769	1452	967	-200	-54	317	58	89	93	1508	2525	714	242	27	2122	-9	3	-24	59
2754.38	1690	-376	-2468	-1482	2172	2706	580	1542	1605	2955	-273	4950	+*******	551	+*******	129	246	88	-11	40	55	15	1552	12	-14	-49	-52	-509	-140	166	-776	1457	990	-199	-54	319	58	86	90	1503	2814	714	338	25	2160	-10	2	-21	54
2727.59	1687	-414	-2491	-1450	2139	2696	593	+*******	1746	3011	-271	5220	+*******	563	+*******	132	249	92	-11	39	52	15	1543	13	-14	-48	-48	-489	-134	161	-791	1455	989	-193	-56	316	57	83	89	1493	3027	727	379	49	2252	-13	4	-29	43
2700.86	1683	-386	-2507	-1453	2100	2685	617	+*******	1911	3026	-265	+*******	+*******	566	+*******	136	252	98	-10	38	51	15	1539	14	-14	-48	-46	-477	-130	156	-807	1466	990	-189	-56	316	57	84	88	1488	2927	739	423	33	2360	-14	-18	-23	40
2693.63	1694	-386	-2514	-1455	2085	2680	638	+*******	2002	3039	-261	+*******	+*******	575	+*******	138	256	102	-11	38	51	15	1537	15	-15	-48	-44	-471	-128	152	-820	1469	995	-187	-55	316	57	85	87	1487	2841	748	439	36	2377	-16	-24	-12	40
2693.68	1706	-380	-2522	-1454	2074	2679	656	+*******	2073	3078	-257	+*******	+*******	581	+*******	140	264	107	-11	38	51	15	1537	15	-15	-48	-44	-466	-126	150	-833	1479	995	-186	-57	318	57	86	86	1487	2919	757	456	53	2413	-17	-37	-4	45
2693.68	1716	-375	-2527	-1451	2064	2673	675	+*******	2155	3102	-253	+*******	+*******	585	+*******	140	272	113	-11	38	51	15	1536	15	-15	-47	-42	-461	-124	148	-846	1486	991	-184	-56	313	57	88	85	1487	2861	763	462	39	2478	-15	-47	3	51
2687.09	1731	-368	-2532	-1447	2049	2668	695	+*******	2280	3136	-249	+*******	+*******	591	+*******	141	282	119	-11	37	51	15	1535	16	-14	-47	-41	-455	-121	145	-858	1487	991	-182	-57	318	57	88	85	1486	2907	763	479	56	2529	-16	-56	7	55
2687.09	1743	-364	-2538	-1443	2033	2654	713	+*******	2414	3177	-244	+*******	+*******	600	+*******	143	296	128	-11	37	51	16	1536	16	-15	-47	-39	-448	-119	143	-872	1494	985	-180	-56	316	57	89	85	1486	2862	770	489	42	2588	-18	-69	17	58
2687.09	1762	-367	-2544	-1435	2017	2651	727	+*******	2545	3220	-242	+*******	+*******	609	+*******	147	303	135	-11	37	51	16	1536	17	-15	-47	-38	-443	-117	140	-886	1500	979	-178	-56	313	57	89	84	1485	2893	783	491	60	2641	-15	-83	23	62
2687.09	1778	-362	-2548	-1423	1987	2652	745	+*******	2847	3266	-240	+*******	+*******	619	+*******	153	319	146	-11	37	51	16	1535	17	-14	-46	-36	-435	-114	137	-905	1510	971	-175	-55	308	56	90	84	1485	2881	799	493	57	2714	-15	-96	26	66
2680.51	1795	-352	-2556	-1399	1946	2648	759	+*******	4605	3299	-239	+*******	+*******	626	+*******	156	338	153	-11	36	52	16	1535	18	-15	-46	-34	-423	-109	133	-928	1519	958	-171	-55	308	56	90	81	1481	2823	815	506	44	2784	-16	-116	33	69
2666.84	1826	-343	-2558	-1341	1912	2671	748	+*******	+*******	3299	-239	+*******	+*******	628	+*******	163	352	166	-11	35	52	16	1533	19	-15	-46	-30	-404	-102	127	-960	1520	983	-164	-55	311	56	90	79	1466	2890	833	535	61	2853	-17	-133	39	75
2632.82	1822	-318	-2521	+*******	1836	+*******	756	+*******	+*******	3162	-244	+*******	+*******	650	+*******	176	383	178	-10	33	50	17	1530	22	-15	-45	-22	-374	-89	118	-1009	1527	1068	-151	-56	307	55	87	78	1446	2754	860	615	45	3055	-15	-172	48	80
2602.53	1800	+*******	+*******	+*******	1774	+*******	791	+*******	+*******	3108	-249	+*******	+*******	678	+*******	183	421	194	-10	32	50	17	1526	23	-16	-44	-17	-353	-78	109	-1052	1531	1112	-144	-56	307	55	81	77	1433	2809	894	628	65	3233	-15	-195	57	77
2538.7	1867	+*******	+*******	+*******	1730	+*******	846	+*******	+*******	3073	-254	+*******	+*******	710	+*******	199	411	217	-10	33	56	18	1507	28	-14	-45	-8	-322	-62	91	-1144	1534	1156	-130	-55	306	54	78	73	1395	2679	895	371	55	3456	-9	-207	70	74
2322.27	1919	+*******	+*******	+*******	1602	+*******	879	+*******	+*******	3068	-264	+*******	+*******	680	+*******	191	358	239	-11	33	63	19	1477	31	-14	-43	-4	-303	-52	75	-1171	1505	1078	-120	-58	302	53	77	69	1343	2587	873	450	48	3940	-15	-186	70	70
2275.29	1917	+*******	+*******	+*******	1576	+*******	880	+*******	+*******	3068	-264	+*******	+*******	679	+*******	191	355	240	-11	34	63	19	1475	32	-14	-43	-4	-300	-51	81	-1169	1499	1074	-119	-58	302	53	78	70	1334	2568	866	458	50	3953	-15	-184	69	70
2133.38	1898	+*******	+*******	+*******	1529	+*******	881	+*******	+*******	3046	-265	+*******	+*******	672	+*******	190	353	241	-11	34	64	20	1468	32	-14	-43	-2	-292	-48	79	-1157	1481	1056	-116	-58	302	52	78	70	1307	2514	843	451	54	3941	-15	-183	65	68
2079.05	1872	+*******	+*******	+*******	1488	+*******	880	+*******	+*******	3021	-266	+*******	+*******	664	+*******	189	351	241	-12	35	63	20	1460	33	-13	-43	-1	-284	-46	77	-1145	1457	1039	-112	-59	303	52	78	70	1276	2519	818	446	54	3917	-16	-182	63	66
1984.93	1830	+*******	+*******	+*******	1416	+*******	877	+*******	+*******	2969	-267	+*******	+*******	650	+*******	188	348	240	-12	37	61	21	1440	34	-12	-44	3	-268	-39	72	-1119	1414	1006	-105	-60	304	51	80	69	1208	2440	766	452	51	3874	-17	-180	61	61
1869.8	1771	+*******	+*******	+*******	1339	+*******	874	+*******	+*******	2898	-265	+*******	+*******	633	+*******	187	345	239	-13	38	58	22	1417	36	-11	-44	6	-252	-34	67	-1092	1362	976	-99	-59	306	51	79	67	1140	2357	718	452	54	3816	-20	-174	56	57
1762.02	1709	+*******	+*******	+*******	1280	+*******	871	+*******	+*******	2822	-264	+*******	+*******	615	+*******	186	341	235	-13	40	55	23	1391	38	-9	-44	9	-235	-28	61	-1066	1313	942	-92	-59	307	50	81	68	1064	2204	666	443	52	3758	-19	-169	48	49
1640.3	1646	+*******	+*******	+*******	1317	+*******	867	+*******	+*******	2732	-261	+*******	+*******	596	+*******	186	337	232	-14	44	50	24	1355	39	-7	-44	12	-217	-21	56	-1035	1251	906	-85	-59	309	49	83	67	973	2099	604	444	62	3695	-21	-161	41	46
1457.95	1531	+*******	+*******	+*******	1228	+*******	855	+*******	+*******	2569	-257	+*******	+*******	561	+*******	188	327	216	-15	45	42	25	1276	41	-5	-44	17	-189	-12	44	-983	1128	847	-73	-62	312	46	84	63	819	1793	508	464	47	3593	-20	-153	29	34
1228.45	1299	+*******	+*******	+*******	1075	+*******	818	+*******	+*******	2279	-249	+*******	+*******	498	+*******	195	294	207	-14	33	27	20	1081	45	-11	-44	22	-145	0	22	-906	924	769	-53	-73	311	39	90	51	587	1569	377	461	50	3394	-18	-135	14	22
1038.85	1086	+*******	+*******	+*******	980	+*******	781	+*******	+*******	2012	-239	+*******	+*******	451	+*******	203	262	196	-12	26	15	17	900	48	-15	-44	27	-116	10	14	-848	771	706	-38	-79	313	37	91	43	438	1366	314	468	62	3203	-11	-115	5	15
890.57	904	+*******	+*******	+*******	889	+*******	744	+*******	+*******	1777	-230	+*******	+*******	413	+*******	216	230	183	-12	19	5	14	729	50	-17	-44	31	-89	18	10	-785	604	649	-25	-88	319	32	94	36	293	1140	244	503	43	3028	-14	-96	-6	8
478.55	513	+*******	+*******	+*******	745	+*******	648	+*******	+*******	1228	-192	+*******	+*******	334	+*******	263	140	144	-9	3	-15	7	321	56	-22	-44	42	-41	36	18	-630	255	497	2	-99	332	25	112	14	17	827	127	522	40	2580	-3	-59	-19	-11
222.32	274	+*******	+*******	+*******	642	+*******	572	+*******	+*******	854	-151	+*******	+*******	295	+*******	306	76	115	-8	-5	-24	3	101	59	-24	-44	47	-21	44	24	-532	110	403	14	-100	334	22	128	8	-95	568	59	537	43	2205	7	-40	-31	-25
73.17	145	+*******	+*******	+*******	583	+*******	524	+*******	+*******	541	-123	+*******	+*******	276	+*******	332	40	96	-7	-9	-26	0	25	61	-24	-44	50	-11	47	28	-471	51	350	21	-102	335	21	140	2	-150	579	32	525	30	1948	15	-30	-34	-34
12.37	83	+*******	+*******	+*******	544	+*******	500	+*******	+*******	393	-108	+*******	+*******	266	+*******	347	28	79	-6	-12	-28	-3	-6	61	-24	-44	50	-7	48	29	-443	27	325	23	-105	335	20	148	0	-175	494	16	536	42	1819	11	-21	-37	-38
-0.7	52	+*******	+*******	+*******	536	+*******	484	+*******	+*******	314	-98	+*******	+*******	260	+*******	342	19	72	-6	-12	-27	-3	-25	62	-23	-43	51	-5	48	31	-423	20	308	24	-105	334	20	153	-2	-191	383	8	535	26	1742	15	-19	-37	-41
[truncated: 25 more columns]
